# Supplementary material for: Machine learning-guided optimization for ionic liquid-based polyethylene terephthalate waste recycling
Source: Royal Society of Chemistry journal article supplement (doi:10.1039/d5gc01998b), 2025-01-01
Supplement: d5gc01998b1.xlsx [file d5gc01998b1.xlsx]

## Sheet: Comment
	Page			Comment
	Literature_Data			Contains data collected from literature. References for the data can be found from Supplementary Materials.
	Comparison_Exp-Pred			Cases for experimental validation. Contains their experimental values, predicted values, and estimated KPIs.
	KPI_Literature			Contains the estimated KPIs for top literature data.
	KPI_Screen			Contains the top 1e4 cases based on their KPI estimated from simulation.

## Sheet: Literature_Data
paper	cation_name	anion_name	cation_smiles	anion_smiles	catalyst_amount	solvent	solvent_amount	PET_amount	conversion	selectivity	temperature_c	reaction_time_min	PET_source	PET_size_mm	yield
-	-	-	-	-	g	-	g	g	%	%	C	min	-	mm	%
Wang(2015) First-Row	BMIM	CoCl4	CCCCN1C=C[N+](=C1)C	Cl[Co-2](Cl)(Cl)Cl	0	eg	20	5	2	5	170	90	Powder	0.3
Wang(2010) Fe	BMIM	FeCl4	CCCCN1C=C[N+](=C1)C	Cl[Fe-](Cl)(Cl)Cl	0	eg	20	5	0	0	160	240	Pellet	3
Liu(2020) Degradation	Ch	Ac	C[N+](C)(C)CCO	CC(=O)[O-]	0	eg	20	5	3		180	180	Powder	0.3	0
Zhou(2012) Effective	DEIM	Zn(Ac)3	CC[N]1C=C[N+](=C1)CC	[Zn+2](CC(=O)[O-])(CC(=O)[O-])(CC(=O)[O-])	0	eg	20	3	69	54	180	150	Powder	0.3
Yue(2013) The	BMIM	ZnCl3	CCCCN1C=C[N+](=C1)C	Cl[Zn-](Cl)Cl	0.003125	eg	22	2	52.2	68.9655	190	120	Bottle	1	36
Yue(2013) The	BMIM	ZnCl3	CCCCN1C=C[N+](=C1)C	Cl[Zn-](Cl)Cl	0.0062	eg	22	2	7.04	18.892	190	30	Bottle	1	1.33
Yue(2013) The	BMIM	ZnCl3	CCCCN1C=C[N+](=C1)C	Cl[Zn-](Cl)Cl	0.0062	eg	22	2	15	8.86667	190	60	Bottle	1	1.33
Yue(2013) The	BMIM	ZnCl3	CCCCN1C=C[N+](=C1)C	Cl[Zn-](Cl)Cl	0.0062	eg	22	2	33	51.5152	190	90	Bottle	1	17
Yue(2013) The	BMIM	MnCl3	CCCCN1C=C[N+](=C1)C	Cl[Mn-](Cl)Cl	0.0062	eg	22	2	64.5	59.2248	190	120	Bottle	1	38.2
Yue(2013) The	BMIM	ZnCl3	CCCCN1C=C[N+](=C1)C	Cl[Zn-](Cl)Cl	0.0062	eg	22	2	52	69.2308	190	120	Bottle	1	36
Yue(2013) The	BMIM	ZnCl3	CCCCN1C=C[N+](=C1)C	Cl[Zn-](Cl)Cl	0.0062	eg	22	2	79	75.9494	190	180	Bottle	1	60
Yue(2013) The	BMIM	ZnCl3	CCCCN1C=C[N+](=C1)C	Cl[Zn-](Cl)Cl	0.0062	eg	22	2	97	80.4124	190	240	Bottle	1	78
Yue(2013) The	BMIM	ZnCl3	CCCCN1C=C[N+](=C1)C	Cl[Zn-](Cl)Cl	0.0062	eg	22	2	100	83.8	190	300	Bottle	1	83.8
Yue(2013) The	BMIM	ZnCl3	CCCCN1C=C[N+](=C1)C	Cl[Zn-](Cl)Cl	0.00625	eg	22	2	100	79.5	190	120	Bottle	1	79.5
Yue(2013) The	BMIM	ZnCl3	CCCCN1C=C[N+](=C1)C	Cl[Zn-](Cl)Cl	0.0125	eg	22	2	100	83.4	190	120	Bottle	1	83.4
Marullo(2021) Amino	Ch	OH	C[N+](C)(C)CCO	[OH-]	0.0127	eg	0.4	0.1	32		150	360	Pellet		17
Marullo(2021) Amino	Ch	Im	C[N+](C)(C)CCO	C1=CN=C[N-]1	0.0179	eg	0.4	0.1	9		150	360	Pellet		0
Marullo(2021) Amino	Ch	Gly	C[N+](C)(C)CCO	C(C(=O)[O-])N	0.0186	eg	0.4	0.1	83		120	240	Pellet		15
Marullo(2021) Amino	Ch	Gly	C[N+](C)(C)CCO	C(C(=O)[O-])N	0.0186	eg	0.4	0.1	83		150	240	Pellet		29
Marullo(2021) Amino	Ch	Gly	C[N+](C)(C)CCO	C(C(=O)[O-])N	0.0186	eg	0.4	0.1	100		180	240	Pellet		25
Marullo(2021) Amino	Ch	Gly	C[N+](C)(C)CCO	C(C(=O)[O-])N	0.0186	eg	0.4	0.1	83		150	240	Pellet		29
Marullo(2021) Amino	Ch	Gly	C[N+](C)(C)CCO	C(C(=O)[O-])N	0.0186	eg	0.4	0.1	80		150	360	Pellet		43
Marullo(2021) Amino	Ch	Gly	C[N+](C)(C)CCO	C(C(=O)[O-])N	0.0186	eg	0.4	0.1	0		150	360	Pellet		0
Marullo(2021) Amino	Ch	Gly	C[N+](C)(C)CCO	C(C(=O)[O-])N	0.0186	eg	0.4	0.1	49		150	360	Pellet		23
Marullo(2021) Amino	Ch	Gly	C[N+](C)(C)CCO	C(C(=O)[O-])N	0.0186	eg	0.4	0.1	80		150	360	Pellet		43
Marullo(2021) Amino	Ch	Gly	C[N+](C)(C)CCO	C(C(=O)[O-])N	0.0186	eg	0.4	0.1	80		150	360	Pellet		43
Marullo(2021) Amino	Ch	Gly	C[N+](C)(C)CCO	C(C(=O)[O-])N	0.0186	eg	0.4	0.1	85		150	360	Bottle	10	51
Marullo(2021) Amino	Ch	Gly	C[N+](C)(C)CCO	C(C(=O)[O-])N	0.0186	eg	0.4	0.1	62		150	360	Bottle	10	31
Marullo(2021) Amino	Ch	Gly	C[N+](C)(C)CCO	C(C(=O)[O-])N	0.0186	eg	0.4	0.1	84		150	360	Bottle	10	20
Marullo(2021) Amino	Ch	Gly	C[N+](C)(C)CCO	C(C(=O)[O-])N	0.0186	eg	0.4	0.1	91		180	360	Bottle	10	61
Marullo(2021) Amino	Ch	Gly	C[N+](C)(C)CCO	C(C(=O)[O-])N	0.0186	eg	0.4	0.1	90		150	480	Pellet		38
Yue(2010) GlycoLysis	BMIM	OH	CCCCN1C=C[N+](=C1)C	[OH-]	0.02	eg	20	2	51	35.2941	190	120	Bottle	1	18
Marullo(2021) Amino	Ch	Ala	C[N+](C)(C)CCO	CC(C(=O)[O-])N	0.02	eg	0.4	0.1	6		150	360	Pellet		0
Shuangjun(2020) Glycolysis	HMIM	CoCl3	CCCCCCN1C=C[N+](=C1)C	Cl[Co-](Cl)Cl	0.02	eg	22	2	26.5		190	60	Bottle	4	11.8
Shuangjun(2020) Glycolysis	HMIM	ZnCl3	CCCCCCN1C=C[N+](=C1)C	Cl[Zn-](Cl)Cl	0.02	eg	22	2	59.6		190	60	Bottle	4	7.9
Shuangjun(2020) Glycolysis	HMIM	CoCl3	CCCCCCN1C=C[N+](=C1)C	Cl[Co-](Cl)Cl	0.02	eg	22	2	69.8		190	90	Bottle	4	24.5
Shuangjun(2020) Glycolysis	HMIM	ZnCl3	CCCCCCN1C=C[N+](=C1)C	Cl[Zn-](Cl)Cl	0.02	eg	22	2	100		190	90	Bottle	4	68.3
Shuangjun(2020) Glycolysis	HMIM	CoCl3	CCCCCCN1C=C[N+](=C1)C	Cl[Co-](Cl)Cl	0.02	eg	22	2	85.5		190	120	Bottle	4	38.1
Shuangjun(2020) Glycolysis	HMIM	ZnCl3	CCCCCCN1C=C[N+](=C1)C	Cl[Zn-](Cl)Cl	0.02	eg	22	2	100		190	120	Bottle	4	76.8
Shuangjun(2020) Glycolysis	HMIM	CoCl3	CCCCCCN1C=C[N+](=C1)C	Cl[Co-](Cl)Cl	0.02	eg	22	2	100		190	240	Bottle	4	79
Shuangjun(2020) Glycolysis	HMIM	ZnCl3	CCCCCCN1C=C[N+](=C1)C	Cl[Zn-](Cl)Cl	0.02	eg	22	2	100		190	240	Bottle	4	72.8
Marullo(2021) Amino	Ch	PO4	C[N+](C)(C)CCO	[O-]P(=O)([O-])[O-]	0.0208	eg	0.4	0.1	72		150	360	Pellet		27
Yue(2013) The	BMIM	ZnCl3	CCCCN1C=C[N+](=C1)C	Cl[Zn-](Cl)Cl	0.025	eg	22	2	100	84.9	190	120	Bottle	1	84.9
Sce(2019) Comparing	DMIM	Fe2Cl6O	CN1C=C[N+](=C1)C	Cl[Fe-](Cl)(Cl)O[Fe-](Cl)(Cl)Cl	0.025	eg	0.888	0.125	82		170	1440	Pellet	4	54
Sce(2019) Comparing	DMIM	Fe2Cl6O	CN1C=C[N+](=C1)C	Cl[Fe-](Cl)(Cl)O[Fe-](Cl)(Cl)Cl	0.025	eg	0.888	0.125	96		170	1440	Bottle	6	74
Sce(2019) Comparing	DMIM	FeCl4	CN1C=C[N+](=C1)C	Cl[Fe-](Cl)(Cl)Cl	0.025	eg	0.888	0.125	99		170	1440	Pellet	4	78
Sce(2019) Comparing	DMIM	FeCl4	CN1C=C[N+](=C1)C	Cl[Fe-](Cl)(Cl)Cl	0.025	eg	0.888	0.125	89		170	1440	Bottle	6	77
Sce(2019) Comparing	DMIM	FeCl4	CN1C=C[N+](=C1)C	Cl[Fe-](Cl)(Cl)Cl	0.025	eg	0.888	0.125	99		170	1440	Powder		93
Marullo(2021) Amino	Ch	Lys	C[N+](C)(C)CCO	C(CCN)CC(C(=O)[O-])N	0.026	eg	0.4	0.1	50		150	360	Pellet		24
Yue(2010) GlycoLysis	BMIM	OH	CCCCN1C=C[N+](=C1)C	[OH-]	0.04	eg	20	2	74	35.1351	190	120	Bottle	1	26
Yao(2021) Multiple	BMIM	Pro	CCCCN1C=C[N+](=C1)C	C1CC(NC1)C(=O)[O-]	0.05	eg	4	1	100		190	60	Powder	0.3	75
Yao(2021) Multiple	BMIM	Ac	CCCCN1C=C[N+](=C1)C	CC(=O)[O-]	0.05	eg	4	1	100		190	90	Powder	0.3	60
Yao(2021) Multiple	BMIM	Ala	CCCCN1C=C[N+](=C1)C	CC(C(=O)[O-])N	0.05	eg	4	1	89.2		190	120	Powder	0.3	67.6
Yao(2021) Multiple	BMIM	Arg	CCCCN1C=C[N+](=C1)C	C(CC(C(=O)[O-])N)CN=C(N)N	0.05	eg	4	1	76.3		190	120	Powder	0.3	26.7
Yao(2021) Multiple	BMIM	His	CCCCN1C=C[N+](=C1)C	C1=C(N=CN1)CC(C(=O)[O-])N	0.05	eg	4	1	80.3		190	120	Powder	0.3	62.3
Yao(2021) Multiple	BMIM	Leu	CCCCN1C=C[N+](=C1)C	CC(C)CC(C(=O)[O-])N	0.05	eg	4	1	86.1		190	120	Powder	0.3	63.4
Yao(2021) Multiple	BMIM	Lys	CCCCN1C=C[N+](=C1)C	C(CCN)CC(C(=O)[O-])N	0.05	eg	4	1	99.1		190	120	Powder	0.3	66.4
Yao(2021) Multiple	BMIM	Pro	CCCCN1C=C[N+](=C1)C	C1CC(NC1)C(=O)[O-]	0.05	eg	4	1	100		190	120	Powder	0.3	75.5
Yue(2013) The	BMIM	ZnCl3	CCCCN1C=C[N+](=C1)C	Cl[Zn-](Cl)Cl	0.05	eg	22	2	100	83	190	120	Bottle	1	83
Sun(2017) Solubilization	Ch	Asp	C[N+](C)(C)CCO	C(C(C(=O)[O-])N)C(=O)O	0.05	eg	2	0.5	100		180	240	Bottle	10	34.7
Sun(2017) Solubilization	Ch	Lys	C[N+](C)(C)CCO	C(CCN)CC(C(=O)[O-])N	0.05	eg	2	0.5	100		180	240	Bottle	10	42.7
Sun(2017) Solubilization	Ch	PO4	C[N+](C)(C)CCO	[O-]P(=O)([O-])[O-]	0.05	eg	2	0.5	100		180	240	Bottle	10	55.1
Sun(2017) Solubilization	Ch	PO4	C[N+](C)(C)CCO	[O-]P(=O)([O-])[O-]	0.05	eg	2	0.5	90.1		180	240	Bottle	10	45.5
Sun(2017) Solubilization	Ch	PO4	C[N+](C)(C)CCO	[O-]P(=O)([O-])[O-]	0.05	eg	2	0.5	10.1		180	240	Bottle	10	4.5
Sun(2017) Solubilization	Ch	PO4	C[N+](C)(C)CCO	[O-]P(=O)([O-])[O-]	0.05	eg	2	0.5	100		180	240	Bottle	10	60.6
Sun(2017) Solubilization	Ch	PO4	C[N+](C)(C)CCO	[O-]P(=O)([O-])[O-]	0.05	eg	2	0.5	13.6		160	240	Bottle	10	4.5
Sun(2017) Solubilization	Ch	PO4	C[N+](C)(C)CCO	[O-]P(=O)([O-])[O-]	0.05	eg	2	0.5	31		170	240	Bottle	10	10.6
Sun(2017) Solubilization	Ch	PO4	C[N+](C)(C)CCO	[O-]P(=O)([O-])[O-]	0.05	eg	2	0.5	100		190	240	Bottle	10	63.6
Sun(2017) Solubilization	Ch	Cl	C[N+](C)(C)CCO	[Cl-]	0.05	eg	2	0.5	90		180	840	Bottle	10	15.2
Sun(2017) Solubilization	EMIM	Ac	CCN1C=C[N+](=C1)C	CC(=O)[O-]	0.05	eg	2	0.5	100		180	240	Bottle	10	50
Yue(2010) GlycoLysis	BMIM	OH	CCCCN1C=C[N+](=C1)C	[OH-]	0.06	eg	20	2	91	52.7473	190	120	Bottle	1	48
Yue(2010) GlycoLysis	BMIM	OH	CCCCN1C=C[N+](=C1)C	[OH-]	0.08	eg	20	2	93	55.914	190	120	Bottle	1	52
Silva(2018) PET	BMIM	ZnCl3	CCCCN1C=C[N+](=C1)C	Cl[Zn-](Cl)Cl	0.1	eg	4	2			180	60			15.048
Silva(2018) PET	BMIM	ZnCl3	CCCCN1C=C[N+](=C1)C	Cl[Zn-](Cl)Cl	0.1	eg	12	2			170	60			0.6499
Silva(2018) PET	BMIM	ZnCl3	CCCCN1C=C[N+](=C1)C	Cl[Zn-](Cl)Cl	0.1	eg	12	2			190	60			18.9777
Yue(2010) GlycoLysis	BMIM	OH	CCCCN1C=C[N+](=C1)C	[OH-]	0.1	eg	20	2	55	1.81818	190	60	Bottle	1	1
Silva(2018) PET	BMIM	ZnCl3	CCCCN1C=C[N+](=C1)C	Cl[Zn-](Cl)Cl	0.1	eg	20	2			180	60			1.5615
Silva(2018) PET	BMIM	ZnCl3	CCCCN1C=C[N+](=C1)C	Cl[Zn-](Cl)Cl	0.1	eg	4	2			170	90			0.1315
Silva(2018) PET	BMIM	ZnCl3	CCCCN1C=C[N+](=C1)C	Cl[Zn-](Cl)Cl	0.1	eg	4	2			190	90			18.5935
Silva(2018) PET	BMIM	ZnCl3	CCCCN1C=C[N+](=C1)C	Cl[Zn-](Cl)Cl	0.1	eg	12	2			180	90			16.1729
Silva(2018) PET	BMIM	ZnCl3	CCCCN1C=C[N+](=C1)C	Cl[Zn-](Cl)Cl	0.1	eg	12	2			180	90			20.495
Silva(2018) PET	BMIM	ZnCl3	CCCCN1C=C[N+](=C1)C	Cl[Zn-](Cl)Cl	0.1	eg	12	2			180	90			18.1154
Wang(2015) First-Row	BMIM	CoCl4	CCCCN1C=C[N+](=C1)C	Cl[Co-2](Cl)(Cl)Cl	0.1	eg	20	5	52	84	170	90	Powder	0.3
Yue(2010) GlycoLysis	BMIM	OH	CCCCN1C=C[N+](=C1)C	[OH-]	0.1	eg	20	2	75	62.6667	190	90	Bottle	1	47
Silva(2018) PET	BMIM	ZnCl3	CCCCN1C=C[N+](=C1)C	Cl[Zn-](Cl)Cl	0.1	eg	20	2			170	90			0.7044
Silva(2018) PET	BMIM	ZnCl3	CCCCN1C=C[N+](=C1)C	Cl[Zn-](Cl)Cl	0.1	eg	20	2			190	90			37.5753
Silva(2018) PET	BMIM	ZnCl3	CCCCN1C=C[N+](=C1)C	Cl[Zn-](Cl)Cl	0.1	eg	4	2			180	120			16.2325
Yue(2010) GlycoLysis	BMIM	OH	CCCCN1C=C[N+](=C1)C	[OH-]	0.1	eg	10	2	88	53.4091	190	120	Bottle	1	47
Silva(2018) PET	BMIM	ZnCl3	CCCCN1C=C[N+](=C1)C	Cl[Zn-](Cl)Cl	0.1	eg	12	2			170	120			7.849
Silva(2018) PET	BMIM	ZnCl3	CCCCN1C=C[N+](=C1)C	Cl[Zn-](Cl)Cl	0.1	eg	12	2			190	120			29.4154
Yue(2010) GlycoLysis	BMIM	OH	CCCCN1C=C[N+](=C1)C	[OH-]	0.1	eg	15	2	95	62.1053	190	120	Bottle	1	59
Yue(2010) GlycoLysis	BMIM	Br	CCCCN1C=C[N+](=C1)C	[Br-]	0.1	eg	20	2	10.7	0	190	120	Bottle	1	0
Yue(2010) GlycoLysis	BMIM	Cl	CCCCN1C=C[N+](=C1)C	[Cl-]	0.1	eg	20	2	28.9	20.7612	190	120	Bottle	1	6
Yue(2010) Glycolysis	BMIM	HCO3	CCCCN1C=C[N+](=C1)C	OC([O-])=O	0.1	eg	20	2	82.8	17.029	190	120	Bottle	1	14.1
Yue(2010) GlycoLysis	BMIM	OH	CCCCN1C=C[N+](=C1)C	[OH-]	0.1	eg	20	2	100	71.2	190	120	Bottle	1	71.2
Yue(2010) GlycoLysis	BMIM	OH	CCCCN1C=C[N+](=C1)C	[OH-]	0.1	eg	20	2	100	71.2	190	120	Bottle	1	71.2
Yue(2010) GlycoLysis	BMIM	OH	CCCCN1C=C[N+](=C1)C	[OH-]	0.1	eg	20	2	10	10	150	120	Bottle	1	1
Yue(2010) GlycoLysis	BMIM	OH	CCCCN1C=C[N+](=C1)C	[OH-]	0.1	eg	20	2	34	11.7647	160	120	Bottle	1	4
Yue(2010) GlycoLysis	BMIM	OH	CCCCN1C=C[N+](=C1)C	[OH-]	0.1	eg	20	2	36	33.3333	170	120	Bottle	1	12
Yue(2010) GlycoLysis	BMIM	OH	CCCCN1C=C[N+](=C1)C	[OH-]	0.1	eg	20	2	90	50	180	120	Bottle	1	45
Yue(2010) GlycoLysis	BMIM	OH	CCCCN1C=C[N+](=C1)C	[OH-]	0.1	eg	20	2	100	71	190	120	Bottle	1	71
Yue(2010) GlycoLysis	BMIM	OH	CCCCN1C=C[N+](=C1)C	[OH-]	0.1	eg	20	2	100	72	190	120	Bottle	1	72
Yue(2010) GlycoLysis	BMIM	OH	CCCCN1C=C[N+](=C1)C	[OH-]	0.1	eg	20	2	100	71	190	120	Bottle	1	71
Silva(2018) PET	BMIM	ZnCl3	CCCCN1C=C[N+](=C1)C	Cl[Zn-](Cl)Cl	0.1	eg	20	2			180	120			38.2821
Yue(2013) The	BMIM	Cl	CCCCN1C=C[N+](=C1)C	[Cl-]	0.1	eg	22	2	3.3	0	190	120	Bottle	1	0
Yue(2013) The	BMIM	MnCl3	CCCCN1C=C[N+](=C1)C	Cl[Mn-](Cl)Cl	0.1	eg	22	2	100	83.3	190	120	Bottle	1	83.3
Yue(2013) The	BMIM	ZnCl3	CCCCN1C=C[N+](=C1)C	Cl[Zn-](Cl)Cl	0.1	eg	22	2	100	82.6	190	120	Bottle	1	82.6
Yue(2010) GlycoLysis	BMIM	OH	CCCCN1C=C[N+](=C1)C	[OH-]	0.1	eg	25	2	71	40.8451	190	120	Bottle	1	29
Yue(2010) GlycoLysis	BMIM	OH	CCCCN1C=C[N+](=C1)C	[OH-]	0.1	eg	30	2	58	32.7586	190	120	Bottle	1	19
Yue(2010) GlycoLysis	BMIM	OH	CCCCN1C=C[N+](=C1)C	[OH-]	0.1	eg	20	2	100	70	190	240	Bottle	1	70
Yue(2013) The	BMIM	Cl	CCCCN1C=C[N+](=C1)C	[Cl-]	0.1	eg	22	2	35.4	24.8588	190	240	Bottle	1	8.8
Yue(2010) GlycoLysis	BMIM	OH	CCCCN1C=C[N+](=C1)C	[OH-]	0.1	eg	20	2	100	56	190	360	Bottle	1	56
Yue(2013) The	BMIM	Cl	CCCCN1C=C[N+](=C1)C	[Cl-]	0.1	eg	22	2	57.2	24.4755	190	360	Bottle	1	14
Yue(2010) GlycoLysis	BMIM	OH	CCCCN1C=C[N+](=C1)C	[OH-]	0.1	eg	20	2	100	54	190	480	Bottle	1	54
Yue(2013) The	BMIM	Cl	CCCCN1C=C[N+](=C1)C	[Cl-]	0.1	eg	22	2	100	57.1	190	480	Bottle	1	57.1
Yue(2010) GlycoLysis	BMIM	OH	CCCCN1C=C[N+](=C1)C	[OH-]	0.12	eg	20	2	100	56	190	120	Bottle	1	56
Al-Sabagh(2014) GlycoLysis	BMIM	Ac	CCCCN1C=C[N+](=C1)C	CC(=O)[O-]	0.125	eg	20	2	14.8	38.3	180	120	Pellet	4
Al-Sabagh(2014) Cu-	BMIM	Cu(Ac)3	CCCCN1C=C[N+](=C1)C	[Cu+2](CC(=O)[O-])(CC(=O)[O-])(CC(=O)[O-])	0.125	eg	20	2	30	22	180	120	Pellet	4	6.5
Al-Sabagh(2014) Cu-	BMIM	Zn(Ac)3	CCCCN1C=C[N+](=C1)C	[Zn+2](CC(=O)[O-])(CC(=O)[O-])(CC(=O)[O-])	0.125	eg	20	2	32	21.875	180	120	Pellet	4	7
Liu(2020) Degradation	Ch	Ac	C[N+](C)(C)CCO	CC(=O)[O-]	0.125	eg	20	5	81		180	180	Powder	0.3	35
Yue(2010) GlycoLysis	BMIM	OH	CCCCN1C=C[N+](=C1)C	[OH-]	0.14	eg	20	2	100	49	190	120	Bottle	1	49
Yue(2010) GlycoLysis	BMIM	OH	CCCCN1C=C[N+](=C1)C	[OH-]	0.16	eg	20	2	100	47	190	120	Bottle	1	47
Wang(2015) First-Row	BMIM	CoCl4	CCCCN1C=C[N+](=C1)C	Cl[Co-2](Cl)(Cl)Cl	0.25	eg	20	5	85	78	170	90	Powder	0.3
Al-Sabagh(2014) GlycoLysis	BMIM	Ac	CCCCN1C=C[N+](=C1)C	CC(=O)[O-]	0.25	eg	20	2	37.95	45	180	120	Pellet	4
Al-Sabagh(2014) Cu-	BMIM	Cu(Ac)3	CCCCN1C=C[N+](=C1)C	[Cu+2](CC(=O)[O-])(CC(=O)[O-])(CC(=O)[O-])	0.25	eg	20	2	47	23	180	120	Pellet	4	11
Al-Sabagh(2014) Cu-	BMIM	Zn(Ac)3	CCCCN1C=C[N+](=C1)C	[Zn+2](CC(=O)[O-])(CC(=O)[O-])(CC(=O)[O-])	0.25	eg	20	2	33	24.2424	180	120	Pellet	4	8
Wang(2010) Fe	BMIM	FeCl4	CCCCN1C=C[N+](=C1)C	Cl[Fe-](Cl)(Cl)Cl	0.25	eg	20	5	9	50	160	240	Pellet	3
Liu(2020) Degradation	Ch	Ac	C[N+](C)(C)CCO	CC(=O)[O-]	0.25	eg	20	5	46		180	30	Powder	0.3	40
Liu(2020) Degradation	Ch	Ac	C[N+](C)(C)CCO	CC(=O)[O-]	0.25	eg	20	5	70		180	60	Powder	0.3	60
Liu(2022) Optimization	Ch	Arg	C[N+](C)(C)CCO	C(CC(C(=O)[O-])N)CN=C(N)N	0.25	eg	20	5	43		190	90	Bottle	10	34.8
Liu(2022) Optimization	Ch	Cl	C[N+](C)(C)CCO	[Cl-]	0.25	eg	20	5	79		190	90	Bottle	10	67.2
Liu(2022) Optimization	Ch	Gly	C[N+](C)(C)CCO	C(C(=O)[O-])N	0.25	eg	20	5	100		190	90	Bottle	10	84.5
Liu(2022) Optimization	Ch	Lys	C[N+](C)(C)CCO	C(CCN)CC(C(=O)[O-])N	0.25	eg	20	5	36		190	90	Bottle	10	35.2
Liu(2022) Optimization	Ch	Pro	C[N+](C)(C)CCO	C1CC(NC1)C(=O)[O-]	0.25	eg	20	5	59		190	90	Bottle	10	40.2
Liu(2022) Optimization	Ch	Ser	C[N+](C)(C)CCO	C(C(C(=O)[O-])N)O	0.25	eg	20	5	25		190	90	Bottle	10	19.6
Liu(2022) Optimization	Ch	Try	C[N+](C)(C)CCO	C1=CC=C2C(=C1)C(=CN2)CC(C(=O)[O-])N	0.25	eg	20	5	79		190	90	Bottle	10	48.5
Liu(2020) Degradation	Ch	Ac	C[N+](C)(C)CCO	CC(=O)[O-]	0.25	eg	20	5	90		180	120	Powder	0.3	78
Liu(2022) Optimization	Ch	Ac	C[N+](C)(C)CCO	CC(=O)[O-]	0.25	eg	20	5	94.3		180	180	Bottle	10	82.9
Liu(2020) Degradation	Ch	Ac	C[N+](C)(C)CCO	CC(=O)[O-]	0.25	eg	20	5	94.3		180	180	Powder	0.3	82.9
Liu(2020) Degradation	Ch	Ac	C[N+](C)(C)CCO	CC(=O)[O-]	0.25	eg	20	5	19		145	180	Powder	0.3	16
Liu(2020) Degradation	Ch	Ac	C[N+](C)(C)CCO	CC(=O)[O-]	0.25	eg	20	5	38		155	180	Powder	0.3	33
Liu(2020) Degradation	Ch	Ac	C[N+](C)(C)CCO	CC(=O)[O-]	0.25	eg	20	5	63		165	180	Powder	0.3	54
Liu(2020) Degradation	Ch	Ac	C[N+](C)(C)CCO	CC(=O)[O-]	0.25	eg	20	5	81		175	180	Powder	0.3	70
Liu(2020) Degradation	Ch	Ac	C[N+](C)(C)CCO	CC(=O)[O-]	0.25	eg	20	5	95		180	180	Powder	0.3	82
Liu(2020) Degradation	Ch	Ac	C[N+](C)(C)CCO	CC(=O)[O-]	0.25	eg	20	5	100		190	180	Powder	0.3	85
Liu(2020) Degradation	Ch	Ac	C[N+](C)(C)CCO	CC(=O)[O-]	0.25	eg	20	5	100		195	180	Powder	0.3	86
Liu(2020) Degradation	Ch	Ac	C[N+](C)(C)CCO	CC(=O)[O-]	0.25	eg	20	5	94		180	180	Powder	0.3	82
Liu(2020) Degradation	Ch	Ac	C[N+](C)(C)CCO	CC(=O)[O-]	0.25	eg	20	5	95		180	180	Powder	0.3	82
Liu(2020) Degradation	Ch	But	C[N+](C)(C)CCO	CCCC(=O)[O-]	0.25	eg	20	5	33.3		180	180	Powder	0.3	9.9
Liu(2020) Degradation	Ch	Cl	C[N+](C)(C)CCO	[Cl-]	0.25	eg	20	5	3.2		180	180	Powder	0.3	0
Liu(2022) Optimization	Ch	For	C[N+](C)(C)CCO	C(=O)[O-]	0.25	eg	20	5	97.1		180	180	Bottle	10	84.5
Liu(2020) Degradation	Ch	For	C[N+](C)(C)CCO	C(=O)[O-]	0.25	eg	20	5	97.1		180	180	Powder	0.3	84.5
Liu(2020) Degradation	Ch	HSO4	C[N+](C)(C)CCO	OS(=O)(=O)[O-]	0.25	eg	20	5	2.9		180	180	Powder	0.3	0
Liu(2020) Degradation	Ch	Mesy	C[N+](C)(C)CCO	CS(=O)(=O)[O-]	0.25	eg	20	5	4.2		180	180	Powder	0.3	0
Liu(2020) Degradation	Ch	Pro	C[N+](C)(C)CCO	CCC(=O)[O-]	0.25	eg	20	5	65.1		180	180	Powder	0.3	40.5
Liu(2020) Degradation	Ch	Ac	C[N+](C)(C)CCO	CC(=O)[O-]	0.25	eg	20	5	98		180	240	Powder	0.3	85
Liu(2020) Degradation	Ch	Ac	C[N+](C)(C)CCO	CC(=O)[O-]	0.25	eg	20	5	100		180	300	Powder	0.3	84
Zhou(2012) Effective	DEIM	Zn(Ac)3	CC[N]1C=C[N+](=C1)CC	[Zn+2](CC(=O)[O-])(CC(=O)[O-])(CC(=O)[O-])	0.25	eg	20	3	69	68	180	150	Powder	0.3
Wang(2013) 1-Allyl-3-methylimidazolium	AMIM	Cl	C[N+]1=CN(C=C1)CC=C	[Cl-]	0.5	eg	20	5	4.8	11.4	175	75	Pellet	3
Wang(2013) 1-Allyl-3-methylimidazolium	AMIM	CoCl3	C[N+]1=CN(C=C1)CC=C	Cl[Co-](Cl)Cl	0.5	eg	20	5	100	79.5	175	75	Pellet	3
Wang(2013) 1-Allyl-3-methylimidazolium	AMIM	ZnCl3	C[N+]1=CN(C=C1)CC=C	Cl[Zn-](Cl)Cl	0.5	eg	20	5	100	80.1	175	75	Pellet	3
Wang(2013) 1-Allyl-3-methylimidazolium	AMIM	MnCl3	C[N+]1=CN(C=C1)CC=C	Cl[Mn-](Cl)Cl	0.5	eg	20	5	100	74.6	175	90	Pellet	3
Wang(2013) 1-Allyl-3-methylimidazolium	AMIM	CuCl3	C[N+]1=CN(C=C1)CC=C	Cl[Cu-](Cl)Cl	0.5	eg	20	5	10.8	77.3	175	180	Pellet	3
Wang(2013) 1-Allyl-3-methylimidazolium	AMIM	FeCl4	C[N+]1=CN(C=C1)CC=C	Cl[Fe-](Cl)(Cl)Cl	0.5	eg	20	5	100	71.4	175	180	Pellet	3
Wang(2015) First-Row	BMIM	CoCl4	CCCCN1C=C[N+](=C1)C	Cl[Co-2](Cl)(Cl)Cl	0.5	eg	20	5	40	71	170	30	Powder	0.3
Wang(2015) First-Row	BMIM	CoCl4	CCCCN1C=C[N+](=C1)C	Cl[Co-2](Cl)(Cl)Cl	0.5	eg	20	5	66	75	170	60	Powder	0.3
Wang(2013) 1-Allyl-3-methylimidazolium	BMIM	Cl	CCCCN1C=C[N+](=C1)C	[Cl-]	0.5	eg	20	5	3.7	9.8	175	75	Pellet	3
Wang(2013) 1-Allyl-3-methylimidazolium	BMIM	FeCl4	CCCCN1C=C[N+](=C1)C	Cl[Fe-](Cl)(Cl)Cl	0.5	eg	20	5	19.7	48.3	175	75	Pellet	3
Wang(2015) First-Row	BMIM	CoCl4	CCCCN1C=C[N+](=C1)C	Cl[Co-2](Cl)(Cl)Cl	0.5	eg	20	5	92	89	170	90	Powder	0.3
Wang(2015) First-Row	BMIM	CoCl4	CCCCN1C=C[N+](=C1)C	Cl[Co-2](Cl)(Cl)Cl	0.5	eg	20	5	2	33	130	90	Powder	0.3
Wang(2015) First-Row	BMIM	CoCl4	CCCCN1C=C[N+](=C1)C	Cl[Co-2](Cl)(Cl)Cl	0.5	eg	20	5	8	41	140	90	Powder	0.3
Wang(2015) First-Row	BMIM	CoCl4	CCCCN1C=C[N+](=C1)C	Cl[Co-2](Cl)(Cl)Cl	0.5	eg	20	5	28	59	150	90	Powder	0.3
Wang(2015) First-Row	BMIM	CoCl4	CCCCN1C=C[N+](=C1)C	Cl[Co-2](Cl)(Cl)Cl	0.5	eg	20	5	33	68	160	90	Powder	0.3
Wang(2015) First-Row	BMIM	CoCl4	CCCCN1C=C[N+](=C1)C	Cl[Co-2](Cl)(Cl)Cl	0.5	eg	20	5	92	79	170	90	Powder	0.3
Wang(2015) First-Row	BMIM	CoCl4	CCCCN1C=C[N+](=C1)C	Cl[Co-2](Cl)(Cl)Cl	0.5	eg	20	5	100	76	175	90	Powder	0.3
Wang(2015) First-Row	BMIM	CoCl4	CCCCN1C=C[N+](=C1)C	Cl[Co-2](Cl)(Cl)Cl	0.5	eg	20	5	100	75	180	90	Powder	0.3
Wang(2015) First-Row	BMIM	CoCl4	CCCCN1C=C[N+](=C1)C	Cl[Co-2](Cl)(Cl)Cl	0.5	eg	20	5	100	74	185	90	Powder	0.3
Wang(2015) First-Row	BMIM	CoCl4	CCCCN1C=C[N+](=C1)C	Cl[Co-2](Cl)(Cl)Cl	0.5	eg	20	5	93	77	170	90	Powder	0.3
Wang(2015) First-Row	BMIM	CoCl4	CCCCN1C=C[N+](=C1)C	Cl[Co-2](Cl)(Cl)Cl	0.5	eg	20	5	100	77	175	90	Powder	0.3
Wang(2015) First-Row	BMIM	CoCl4	CCCCN1C=C[N+](=C1)C	Cl[Co-2](Cl)(Cl)Cl	0.5	eg	20	2	100	77	175	90	Powder	0.3
Wang(2015) First-Row	BMIM	CoCl4	CCCCN1C=C[N+](=C1)C	Cl[Co-2](Cl)(Cl)Cl	0.5	eg	20	3	100	81	175	90	Powder	0.3
Wang(2015) First-Row	BMIM	CoCl4	CCCCN1C=C[N+](=C1)C	Cl[Co-2](Cl)(Cl)Cl	0.5	eg	20	4	100	79	175	90	Powder	0.3
Wang(2015) First-Row	BMIM	CoCl4	CCCCN1C=C[N+](=C1)C	Cl[Co-2](Cl)(Cl)Cl	0.5	eg	20	5	100	80	175	90	Powder	0.3
Wang(2015) First-Row	BMIM	CoCl4	CCCCN1C=C[N+](=C1)C	Cl[Co-2](Cl)(Cl)Cl	0.5	eg	20	6	100	78	175	90	Powder	0.3
Wang(2015) First-Row	BMIM	CoCl4	CCCCN1C=C[N+](=C1)C	Cl[Co-2](Cl)(Cl)Cl	0.5	eg	20	7	100	72	175	90	Powder	0.3
Wang(2015) First-Row	BMIM	CoCl4	CCCCN1C=C[N+](=C1)C	Cl[Co-2](Cl)(Cl)Cl	0.5	eg	25	5	100	77	175	90	Powder	0.3
Wang(2015) First-Row	BMIM	CoCl4	CCCCN1C=C[N+](=C1)C	Cl[Co-2](Cl)(Cl)Cl	0.5	eg	30	5	100	79	175	90	Powder	0.3
Wang(2015) First-Row	BMIM	CoCl4	CCCCN1C=C[N+](=C1)C	Cl[Co-2](Cl)(Cl)Cl	0.5	eg	35	5	100	80	175	90	Powder	0.3
Wang(2015) First-Row	BMIM	CoCl4	CCCCN1C=C[N+](=C1)C	Cl[Co-2](Cl)(Cl)Cl	0.5	eg	40	5	100	77	175	90	Powder	0.3
Al-Sabagh(2014) GlycoLysis	BMIM	Ac	CCCCN1C=C[N+](=C1)C	CC(=O)[O-]	0.5	eg	20	2	48.5	49.87	180	120	Pellet	4
Wang(2015) First-Row	BMIM	CoCl4	CCCCN1C=C[N+](=C1)C	Cl[Co-2](Cl)(Cl)Cl	0.5	eg	20	5	96	77	170	120	Powder	0.3
Al-Sabagh(2014) Cu-	BMIM	Cu(Ac)3	CCCCN1C=C[N+](=C1)C	[Cu+2](CC(=O)[O-])(CC(=O)[O-])(CC(=O)[O-])	0.5	eg	20	2	53	42	180	120	Pellet	4	22
Al-Sabagh(2014) Cu-	BMIM	Zn(Ac)3	CCCCN1C=C[N+](=C1)C	[Zn+2](CC(=O)[O-])(CC(=O)[O-])(CC(=O)[O-])	0.5	eg	20	2	53	26	180	120	Pellet	4	13
Wang(2015) First-Row	BMIM	CoCl4	CCCCN1C=C[N+](=C1)C	Cl[Co-2](Cl)(Cl)Cl	0.5	eg	20	5	98	76	170	150	Powder	0.3
Wang(2015) First-Row	BMIM	CoCl4	CCCCN1C=C[N+](=C1)C	Cl[Co-2](Cl)(Cl)Cl	0.5	eg	20	5	99	74	170	180	Powder	0.3
Wang(2010) Fe	BMIM	FeCl4	CCCCN1C=C[N+](=C1)C	Cl[Fe-](Cl)(Cl)Cl	0.5	eg	20	5	17		160	180	Pellet	3
Wang(2010) Fe	BMIM	FeCl4	CCCCN1C=C[N+](=C1)C	Cl[Fe-](Cl)(Cl)Cl	0.5	eg	20	5	26		160	240	Pellet	3
Wang(2010) Fe	BMIM	FeCl4	CCCCN1C=C[N+](=C1)C	Cl[Fe-](Cl)(Cl)Cl	0.5	eg	20	5	25	76	160	240	Pellet	3
Wang(2010) Fe	BMIM	FeCl4	CCCCN1C=C[N+](=C1)C	Cl[Fe-](Cl)(Cl)Cl	0.5	eg	20	5	50	70	160	240	Pellet	3
Wang(2010) Fe	BMIM	FeCl4	CCCCN1C=C[N+](=C1)C	Cl[Fe-](Cl)(Cl)Cl	0.5	eg	20	5	34		160	300	Pellet	3
Wang(2010) Fe	BMIM	FeCl4	CCCCN1C=C[N+](=C1)C	Cl[Fe-](Cl)(Cl)Cl	0.5	eg	20	5	40		160	360	Pellet	3
Wang(2010) Fe	BMIM	FeCl4	CCCCN1C=C[N+](=C1)C	Cl[Fe-](Cl)(Cl)Cl	0.5	eg	20	5	48		160	420	Pellet	3
Wang(2021) Formation	C2TMG	ZnCl3	CC[N+]=C(N(C)C)N(C)C	Cl[Zn-](Cl)Cl	0.5	eg	25	5	100		195	70	Powder	0.3	86.6
Wang(2021) Formation	C4TMG	ZnCl3	CCCC[N+]=C(N(C)C)N(C)C	Cl[Zn-](Cl)Cl	0.5	eg	25	5	100		195	70	Powder	0.3	81.4
Wang(2021) Formation	C6TMG	ZnCl3	CCCCCC[N+]=C(N(C)C)N(C)C	Cl[Zn-](Cl)Cl	0.5	eg	25	5	100		195	70	Bottle	10	84
Wang(2021) Formation	C6TMG	ZnCl3	CCCCCC[N+]=C(N(C)C)N(C)C	Cl[Zn-](Cl)Cl	0.5	eg	25	5	100		195	70	Powder	0.3	89.4
Wang(2021) Formation	C6TMG	ZnCl3	CCCCCC[N+]=C(N(C)C)N(C)C	Cl[Zn-](Cl)Cl	0.5	eg	25	5	100		195	70	Powder	0.3	92.7
Wang(2021) Formation	C8TMG	ZnCl3	CCCCCCCC[N+]=C(N(C)C)N(C)C	Cl[Zn-](Cl)Cl	0.5	eg	25	5	100		195	70	Powder	0.3	78.7
Liu(2020) Degradation	Ch	Ac	C[N+](C)(C)CCO	CC(=O)[O-]	0.5	eg	20	5	100		180	180	Powder	0.3	81
Zhou(2012) Effective	DEIM	Zn(Ac)3	CC[N]1C=C[N+](=C1)CC	[Zn+2](CC(=O)[O-])(CC(=O)[O-])(CC(=O)[O-])	0.5	eg	20	3	39	30	180	60	Powder	0.3
Zhou(2012) Effective	DEIM	Co(Ac)3	CC[N]1C=C[N+](=C1)CC	[Co+2](CC(=O)[O-])(CC(=O)[O-])(CC(=O)[O-])	0.5	eg	20	3	100	56.65	180	90	Powder	0.3
Zhou(2012) Effective	DEIM	Zn(Ac)3	CC[N]1C=C[N+](=C1)CC	[Zn+2](CC(=O)[O-])(CC(=O)[O-])(CC(=O)[O-])	0.5	eg	20	3	100	67.1	180	90	Powder	0.3
Zhou(2012) Effective	DEIM	Ni(Ac)3	CC[N]1C=C[N+](=C1)CC	[Ni+2](CC(=O)[O-])(CC(=O)[O-])(CC(=O)[O-])	0.5	eg	20	3	100	54.13	180	105	Powder	0.3
Zhou(2012) Effective	DEIM	Cu(Ac)3	CC[N]1C=C[N+](=C1)CC	[Cu+2](CC(=O)[O-])(CC(=O)[O-])(CC(=O)[O-])	0.5	eg	20	3	100	58.64	180	120	Powder	0.3
Zhou(2012) Effective	DEIM	Zn(Ac)3	CC[N]1C=C[N+](=C1)CC	[Zn+2](CC(=O)[O-])(CC(=O)[O-])(CC(=O)[O-])	0.5	eg	20	3	77	54	180	120	Powder	0.3
Zhou(2012) Effective	DEIM	Zn(Ac)3	CC[N]1C=C[N+](=C1)CC	[Zn+2](CC(=O)[O-])(CC(=O)[O-])(CC(=O)[O-])	0.5	eg	20	3	98	70	180	150	Powder	0.3
Zhou(2012) Effective	DEIM	Zn(Ac)3	CC[N]1C=C[N+](=C1)CC	[Zn+2](CC(=O)[O-])(CC(=O)[O-])(CC(=O)[O-])	0.5	eg	20	3	97	71	180	150	Powder	0.3
Zhou(2012) Effective	DEIM	Zn(Ac)3	CC[N]1C=C[N+](=C1)CC	[Zn+2](CC(=O)[O-])(CC(=O)[O-])(CC(=O)[O-])	0.5	eg	20	3	30	3	160	150	Powder	0.3
Zhou(2012) Effective	DEIM	Zn(Ac)3	CC[N]1C=C[N+](=C1)CC	[Zn+2](CC(=O)[O-])(CC(=O)[O-])(CC(=O)[O-])	0.5	eg	20	3	41	6	170	150	Powder	0.3
Zhou(2012) Effective	DEIM	Zn(Ac)3	CC[N]1C=C[N+](=C1)CC	[Zn+2](CC(=O)[O-])(CC(=O)[O-])(CC(=O)[O-])	0.5	eg	20	3	65	69	175	150	Powder	0.3
Zhou(2012) Effective	DEIM	Zn(Ac)3	CC[N]1C=C[N+](=C1)CC	[Zn+2](CC(=O)[O-])(CC(=O)[O-])(CC(=O)[O-])	0.5	eg	20	3	99	71	180	150	Powder	0.3
Zhou(2012) Effective	DEIM	Zn(Ac)3	CC[N]1C=C[N+](=C1)CC	[Zn+2](CC(=O)[O-])(CC(=O)[O-])(CC(=O)[O-])	0.5	eg	20	3	100	64	190	150	Powder	0.3
Zhou(2012) Effective	DEIM	Zn(Ac)3	CC[N]1C=C[N+](=C1)CC	[Zn+2](CC(=O)[O-])(CC(=O)[O-])(CC(=O)[O-])	0.5	eg	20	1	93.7	47	180	150	Powder	0.3
Zhou(2012) Effective	DEIM	Zn(Ac)3	CC[N]1C=C[N+](=C1)CC	[Zn+2](CC(=O)[O-])(CC(=O)[O-])(CC(=O)[O-])	0.5	eg	20	3	98	70	180	150	Powder	0.3
Zhou(2012) Effective	DEIM	Zn(Ac)3	CC[N]1C=C[N+](=C1)CC	[Zn+2](CC(=O)[O-])(CC(=O)[O-])(CC(=O)[O-])	0.5	eg	20	5	96.5	67.5	180	150	Powder	0.3
Zhou(2012) Effective	DEIM	Zn(Ac)3	CC[N]1C=C[N+](=C1)CC	[Zn+2](CC(=O)[O-])(CC(=O)[O-])(CC(=O)[O-])	0.5	eg	20	6	94.1	62	180	150	Powder	0.3
Zhou(2012) Effective	DEIM	Zn(Ac)3	CC[N]1C=C[N+](=C1)CC	[Zn+2](CC(=O)[O-])(CC(=O)[O-])(CC(=O)[O-])	0.5	eg	20	7	94.3	41	180	150	Powder	0.3
Zhou(2012) Effective	DEIM	Zn(Ac)3	CC[N]1C=C[N+](=C1)CC	[Zn+2](CC(=O)[O-])(CC(=O)[O-])(CC(=O)[O-])	0.5	eg	20	3	100	64	180	180	Powder	0.3
Zhou(2012) Effective	DEIM	Mn(Ac)3	CC[N]1C=C[N+](=C1)CC	[Mn+2](CC(=O)[O-])(CC(=O)[O-])(CC(=O)[O-])	0.5	eg	20	3	100	51.3	180	225	Powder	0.3
Zhou(2012) Effective	DEIM	Zn(Ac)3	CC[N]1C=C[N+](=C1)CC	[Zn+2](CC(=O)[O-])(CC(=O)[O-])(CC(=O)[O-])	0.5	eg	20	3	100	64	180	240	Powder	0.3
Wang(2012) Urea	N1111	Ala	C[N+](C)(C)C	CC(C(=O)[O-])N	0.5	eg	20	5	100	74.6	170	50	Bottle	5
Wang(2012) Urea	N1111	Asp	C[N+](C)(C)C	C(C(C(=O)[O-])N)C(=O)O	0.5	eg	20	5	100	72.7	170	60	Bottle	5
Wang(2012) Urea	N2222	Ala	CC[N+](CC)(CC)CC	CC(C(=O)[O-])N	0.5	eg	20	5	100	74.3	170	50	Bottle	5
Wang(2012) Urea	N2222	Asp	CC[N+](CC)(CC)CC	C(C(C(=O)[O-])N)C(=O)O	0.5	eg	20	5	100	72.5	170	60	Bottle	5
Wang(2012) Urea	N2222	Ser	CC[N+](CC)(CC)CC	C(C(C(=O)[O-])N)O	0.5	eg	20	5	100	71.4	170	120	Bottle	5
Wang(2021) Formation	TMG	CoCl3	[N+]=C(N(C)C)N(C)C	Cl[Co-](Cl)Cl	0.5	eg	25	5	100		195	70	Powder	0.3	81.6
Wang(2021) Formation	TMG	FeCl4	[N+]=C(N(C)C)N(C)C	Cl[Fe-](Cl)(Cl)Cl	0.5	eg	25	5	89.8		195	70	Powder	0.3	79.2
Wang(2021) Formation	TMG	ZnCl3	[N+]=C(N(C)C)N(C)C	Cl[Zn-](Cl)Cl	0.5	eg	25	5	100		195	70	Powder	0.3	84.5
Wang(2010) Fe	BMIM	Cl	CCCCN1C=C[N+](=C1)C	[Cl-]	0.52	eg	20	5	0	0	140	240	Pellet	3
Wang(2010) Fe	BMIM	Cl	CCCCN1C=C[N+](=C1)C	[Cl-]	0.52	eg	20	5	0	0	150	240	Pellet	3
Wang(2010) Fe	BMIM	Cl	CCCCN1C=C[N+](=C1)C	[Cl-]	0.52	eg	20	5	0	0	160	240	Pellet	3
Wang(2010) Fe	BMIM	Cl	CCCCN1C=C[N+](=C1)C	[Cl-]	0.52	eg	20	5	1.2	1.2	170	240	Pellet	3
Wang(2010) Fe	BMIM	Cl	CCCCN1C=C[N+](=C1)C	[Cl-]	0.52	eg	20	5	5.1	5.7	178	240	Pellet	3
Liu(2020) Degradation	Ch	Ac	C[N+](C)(C)CCO	CC(=O)[O-]	0.75	eg	20	5	100		180	180	Powder	0.3	79
Al-Sabagh(2014) GlycoLysis	BMIM	Ac	CCCCN1C=C[N+](=C1)C	CC(=O)[O-]	1	eg	20	2	64	24.8	190	60	Pellet	4
Al-Sabagh(2014) Cu-	BMIM	Cu(Ac)3	CCCCN1C=C[N+](=C1)C	[Cu+2](CC(=O)[O-])(CC(=O)[O-])(CC(=O)[O-])	1	eg	20	2	65	23.0769	190	60	Pellet	4	15
Al-Sabagh(2014) Cu-	BMIM	Zn(Ac)3	CCCCN1C=C[N+](=C1)C	[Zn+2](CC(=O)[O-])(CC(=O)[O-])(CC(=O)[O-])	1	eg	20	2	42	30	190	60	Pellet	4	15
Wang(2015) First-Row	BMIM	CoCl4	CCCCN1C=C[N+](=C1)C	Cl[Co-2](Cl)(Cl)Cl	1	eg	20	5	100	76	170	90	Powder	0.3
Wang(2015) First-Row	BMIM	CoCl4	CCCCN1C=C[N+](=C1)C	Cl[Co-2](Cl)(Cl)Cl	1	eg	20	5	100	73.4	170	90	Powder	0.3
Wang(2015) First-Row	BMIM	CoCl4	CCCCN1C=C[N+](=C1)C	Cl[Co-2](Cl)(Cl)Cl	1	eg	20	5	100	73.5	170	108	Powder	0.71
Al-Sabagh(2014) GlycoLysis	BMIM	Ac	CCCCN1C=C[N+](=C1)C	CC(=O)[O-]	1	eg	20	2	11	0	150	120	Pellet	4
Al-Sabagh(2014) GlycoLysis	BMIM	Ac	CCCCN1C=C[N+](=C1)C	CC(=O)[O-]	1	eg	20	2	37	22	170	120	Pellet	4
Al-Sabagh(2014) GlycoLysis	BMIM	Ac	CCCCN1C=C[N+](=C1)C	CC(=O)[O-]	1	eg	20	2	75.1	61.9	180	120	Pellet	4
Al-Sabagh(2014) GlycoLysis	BMIM	Ac	CCCCN1C=C[N+](=C1)C	CC(=O)[O-]	1	eg	20	2	100	41	190	120	Pellet	4
Al-Sabagh(2014) GlycoLysis	BMIM	Ac	CCCCN1C=C[N+](=C1)C	CC(=O)[O-]	1	eg	20	2	100	41	190	120	Pellet	4
Al-Sabagh(2014) GlycoLysis	BMIM	Br	CCCCN1C=C[N+](=C1)C	[Br-]	1	eg	20	2	0	0	180	120	Pellet	4
Al-Sabagh(2014) Cu-	BMIM	Br	CCCCN1C=C[N+](=C1)C	[Br-]	1	eg	20	2	0	0	180	120	Pellet	4
Al-Sabagh(2014) GlycoLysis	BMIM	Cl	CCCCN1C=C[N+](=C1)C	[Cl-]	1	eg	20	2	0	0	180	120	Pellet	4
Al-Sabagh(2014) Cu-	BMIM	Cl	CCCCN1C=C[N+](=C1)C	[Cl-]	1	eg	20	2	0	0	180	120	Pellet	4
Al-Sabagh(2014) Cu-	BMIM	Cu(Ac)3	CCCCN1C=C[N+](=C1)C	[Cu+2](CC(=O)[O-])(CC(=O)[O-])(CC(=O)[O-])	1	eg	20	2	65.5	44.4	180	120	Pellet	4
Al-Sabagh(2014) Cu-	BMIM	Cu(Ac)3	CCCCN1C=C[N+](=C1)C	[Cu+2](CC(=O)[O-])(CC(=O)[O-])(CC(=O)[O-])	1	eg	20	2	65	45	180	120	Pellet	4	29
Al-Sabagh(2014) Cu-	BMIM	Cu(Ac)3	CCCCN1C=C[N+](=C1)C	[Cu+2](CC(=O)[O-])(CC(=O)[O-])(CC(=O)[O-])	1	eg	20	2	10	0	150	120	Pellet	4
Al-Sabagh(2014) Cu-	BMIM	Cu(Ac)3	CCCCN1C=C[N+](=C1)C	[Cu+2](CC(=O)[O-])(CC(=O)[O-])(CC(=O)[O-])	1	eg	20	2	42	32	170	120	Pellet	4	17
Al-Sabagh(2014) Cu-	BMIM	Cu(Ac)3	CCCCN1C=C[N+](=C1)C	[Cu+2](CC(=O)[O-])(CC(=O)[O-])(CC(=O)[O-])	1	eg	20	2	63	42.8571	180	120	Pellet	4	27
Al-Sabagh(2014) Cu-	BMIM	Cu(Ac)3	CCCCN1C=C[N+](=C1)C	[Cu+2](CC(=O)[O-])(CC(=O)[O-])(CC(=O)[O-])	1	eg	20	2	95	50	190	120	Pellet	4	40
Al-Sabagh(2014) Cu-	BMIM	Cu(Ac)3	CCCCN1C=C[N+](=C1)C	[Cu+2](CC(=O)[O-])(CC(=O)[O-])(CC(=O)[O-])	1	eg	20	2	92	50	190	120	Pellet	4	46
Wang(2013) 1-Allyl-3-methylimidazolium	BMIM	HCO3	CCCCN1C=C[N+](=C1)C	OC([O-])=O	1	eg	20	2	82.8	14.1	190	120	Pellet	3
Wang(2013) 1-Allyl-3-methylimidazolium	BMIM	OH	CCCCN1C=C[N+](=C1)C	[OH-]	1	eg	20	2	100	71.2	190	120	Pellet	3
Al-Sabagh(2014) Cu-	BMIM	Zn(Ac)3	CCCCN1C=C[N+](=C1)C	[Zn+2](CC(=O)[O-])(CC(=O)[O-])(CC(=O)[O-])	1	eg	20	2	63.5	29.16	180	120	Pellet	4
Al-Sabagh(2014) Cu-	BMIM	Zn(Ac)3	CCCCN1C=C[N+](=C1)C	[Zn+2](CC(=O)[O-])(CC(=O)[O-])(CC(=O)[O-])	1	eg	20	2	63	28	180	120	Pellet	4	19
Al-Sabagh(2014) Cu-	BMIM	Zn(Ac)3	CCCCN1C=C[N+](=C1)C	[Zn+2](CC(=O)[O-])(CC(=O)[O-])(CC(=O)[O-])	1	eg	20	2	5	0	150	120	Pellet	4
Al-Sabagh(2014) Cu-	BMIM	Zn(Ac)3	CCCCN1C=C[N+](=C1)C	[Zn+2](CC(=O)[O-])(CC(=O)[O-])(CC(=O)[O-])	1	eg	20	2	26	7.69231	170	120	Pellet	4	2
Al-Sabagh(2014) Cu-	BMIM	Zn(Ac)3	CCCCN1C=C[N+](=C1)C	[Zn+2](CC(=O)[O-])(CC(=O)[O-])(CC(=O)[O-])	1	eg	20	2	62	29	180	120	Pellet	4	20
Al-Sabagh(2014) Cu-	BMIM	Zn(Ac)3	CCCCN1C=C[N+](=C1)C	[Zn+2](CC(=O)[O-])(CC(=O)[O-])(CC(=O)[O-])	1	eg	20	2	100	40	190	120	Pellet	4	40
Al-Sabagh(2014) Cu-	BMIM	Zn(Ac)3	CCCCN1C=C[N+](=C1)C	[Zn+2](CC(=O)[O-])(CC(=O)[O-])(CC(=O)[O-])	1	eg	20	2	100	40	190	120	Pellet	4	40
Wang(2015) First-Row	BMIM	CoCl4	CCCCN1C=C[N+](=C1)C	Cl[Co-2](Cl)(Cl)Cl	1	eg	20	5	100	73.8	170	132	Powder	1.01
Al-Sabagh(2014) GlycoLysis	BMIM	Ac	CCCCN1C=C[N+](=C1)C	CC(=O)[O-]	1	eg	5	2	100	36.6	190	180	Pellet	4
Al-Sabagh(2014) Cu-	BMIM	Cu(Ac)3	CCCCN1C=C[N+](=C1)C	[Cu+2](CC(=O)[O-])(CC(=O)[O-])(CC(=O)[O-])	1	eg	5	2	75	22.6667	190	180	Pellet	4	17
Al-Sabagh(2014) Cu-	BMIM	Zn(Ac)3	CCCCN1C=C[N+](=C1)C	[Zn+2](CC(=O)[O-])(CC(=O)[O-])(CC(=O)[O-])	1	eg	5	2	100	15	190	180	Pellet	4	15
Al-Sabagh(2014) GlycoLysis	BMIM	Ac	CCCCN1C=C[N+](=C1)C	CC(=O)[O-]	1	eg	10	2	100	44.2	190	180	Pellet	4
Al-Sabagh(2014) Cu-	BMIM	Cu(Ac)3	CCCCN1C=C[N+](=C1)C	[Cu+2](CC(=O)[O-])(CC(=O)[O-])(CC(=O)[O-])	1	eg	10	2	100	39	190	180	Pellet	4	39
Al-Sabagh(2014) Cu-	BMIM	Zn(Ac)3	CCCCN1C=C[N+](=C1)C	[Zn+2](CC(=O)[O-])(CC(=O)[O-])(CC(=O)[O-])	1	eg	10	2	100	22	190	180	Pellet	4	22
Al-Sabagh(2014) GlycoLysis	BMIM	Ac	CCCCN1C=C[N+](=C1)C	CC(=O)[O-]	1	eg	20	2	100	53.5	190	180	Pellet	4
Al-Sabagh(2014) GlycoLysis	BMIM	Ac	CCCCN1C=C[N+](=C1)C	CC(=O)[O-]	1	eg	20	2	100	53.5	190	180	Pellet	4
Al-Sabagh(2014) GlycoLysis	BMIM	Ac	CCCCN1C=C[N+](=C1)C	CC(=O)[O-]	1	eg	20	1	100	35.5	190	180	Pellet	4
Al-Sabagh(2014) GlycoLysis	BMIM	Ac	CCCCN1C=C[N+](=C1)C	CC(=O)[O-]	1	eg	20	2	100	53.5	190	180	Pellet	4
Al-Sabagh(2014) GlycoLysis	BMIM	Ac	CCCCN1C=C[N+](=C1)C	CC(=O)[O-]	1	eg	20	3	100	58.21	190	180	Pellet	4
Al-Sabagh(2014) GlycoLysis	BMIM	Ac	CCCCN1C=C[N+](=C1)C	CC(=O)[O-]	1	eg	20	5	100	50.6	190	180	Pellet	4
Al-Sabagh(2014) GlycoLysis	BMIM	Ac	CCCCN1C=C[N+](=C1)C	CC(=O)[O-]	1	eg	20	7	91	28.6	190	180	Pellet	4
Wang(2015) First-Row	BMIM	CoCl4	CCCCN1C=C[N+](=C1)C	Cl[Co-2](Cl)(Cl)Cl	1	eg	20	5	100	74.1	170	180	Powder	1.55
Al-Sabagh(2014) Cu-	BMIM	Cu(Ac)3	CCCCN1C=C[N+](=C1)C	[Cu+2](CC(=O)[O-])(CC(=O)[O-])(CC(=O)[O-])	1	eg	20	2	100	51	190	180	Pellet	4	56
Al-Sabagh(2014) Cu-	BMIM	Cu(Ac)3	CCCCN1C=C[N+](=C1)C	[Cu+2](CC(=O)[O-])(CC(=O)[O-])(CC(=O)[O-])	1	eg	20	2	100	53	190	180	Pellet	4	55
Al-Sabagh(2014) Cu-	BMIM	Cu(Ac)3	CCCCN1C=C[N+](=C1)C	[Cu+2](CC(=O)[O-])(CC(=O)[O-])(CC(=O)[O-])	1	eg	20	1	100	30	190	180	Pellet	4	30
Al-Sabagh(2014) Cu-	BMIM	Cu(Ac)3	CCCCN1C=C[N+](=C1)C	[Cu+2](CC(=O)[O-])(CC(=O)[O-])(CC(=O)[O-])	1	eg	20	2	100	55	190	180	Pellet	4	55
Al-Sabagh(2014) Cu-	BMIM	Cu(Ac)3	CCCCN1C=C[N+](=C1)C	[Cu+2](CC(=O)[O-])(CC(=O)[O-])(CC(=O)[O-])	1	eg	20	3	100	56	190	180	Pellet	4	56
Al-Sabagh(2014) Cu-	BMIM	Cu(Ac)3	CCCCN1C=C[N+](=C1)C	[Cu+2](CC(=O)[O-])(CC(=O)[O-])(CC(=O)[O-])	1	eg	20	5	100	50	190	180	Pellet	4	50
Al-Sabagh(2014) Cu-	BMIM	Cu(Ac)3	CCCCN1C=C[N+](=C1)C	[Cu+2](CC(=O)[O-])(CC(=O)[O-])(CC(=O)[O-])	1	eg	20	7	95	27	190	180	Pellet	4	25
Al-Sabagh(2014) Cu-	BMIM	Zn(Ac)3	CCCCN1C=C[N+](=C1)C	[Zn+2](CC(=O)[O-])(CC(=O)[O-])(CC(=O)[O-])	1	eg	20	2	100	42	190	180	Pellet	4	42
Al-Sabagh(2014) Cu-	BMIM	Zn(Ac)3	CCCCN1C=C[N+](=C1)C	[Zn+2](CC(=O)[O-])(CC(=O)[O-])(CC(=O)[O-])	1	eg	20	2	100	40	190	180	Pellet	4	41
Al-Sabagh(2014) Cu-	BMIM	Zn(Ac)3	CCCCN1C=C[N+](=C1)C	[Zn+2](CC(=O)[O-])(CC(=O)[O-])(CC(=O)[O-])	1	eg	20	1	100	30	190	180	Pellet	4	30
Al-Sabagh(2014) Cu-	BMIM	Zn(Ac)3	CCCCN1C=C[N+](=C1)C	[Zn+2](CC(=O)[O-])(CC(=O)[O-])(CC(=O)[O-])	1	eg	20	2	100	42	190	180	Pellet	4	42
Al-Sabagh(2014) Cu-	BMIM	Zn(Ac)3	CCCCN1C=C[N+](=C1)C	[Zn+2](CC(=O)[O-])(CC(=O)[O-])(CC(=O)[O-])	1	eg	20	3	100	45	190	180	Pellet	4	45
Al-Sabagh(2014) Cu-	BMIM	Zn(Ac)3	CCCCN1C=C[N+](=C1)C	[Zn+2](CC(=O)[O-])(CC(=O)[O-])(CC(=O)[O-])	1	eg	20	5	100	40	190	180	Pellet	4	40
Al-Sabagh(2014) Cu-	BMIM	Zn(Ac)3	CCCCN1C=C[N+](=C1)C	[Zn+2](CC(=O)[O-])(CC(=O)[O-])(CC(=O)[O-])	1	eg	20	7	100	27	190	180	Pellet	4	27
Al-Sabagh(2014) GlycoLysis	BMIM	Ac	CCCCN1C=C[N+](=C1)C	CC(=O)[O-]	1	eg	25	2	100	27.5	190	180	Pellet	4
Al-Sabagh(2014) Cu-	BMIM	Cu(Ac)3	CCCCN1C=C[N+](=C1)C	[Cu+2](CC(=O)[O-])(CC(=O)[O-])(CC(=O)[O-])	1	eg	25	2	100	50	190	180	Pellet	4	50
Al-Sabagh(2014) Cu-	BMIM	Zn(Ac)3	CCCCN1C=C[N+](=C1)C	[Zn+2](CC(=O)[O-])(CC(=O)[O-])(CC(=O)[O-])	1	eg	25	2	100	30	190	180	Pellet	4	35
Wang(2015) First-Row	BMIM	CoCl4	CCCCN1C=C[N+](=C1)C	Cl[Co-2](Cl)(Cl)Cl	1	eg	20	5	100	74.2	170	210	Powder	1.7
Al-Sabagh(2014) GlycoLysis	BMIM	Ac	CCCCN1C=C[N+](=C1)C	CC(=O)[O-]	1	eg	20	2	100	44.9	190	240	Pellet	4
Wang(2015) First-Row	BMIM	CoCl4	CCCCN1C=C[N+](=C1)C	Cl[Co-2](Cl)(Cl)Cl	1	eg	20	5	100	77.8	170	240	Pellet	3
Wang(2015) First-Row	BMIM	CoCl4	CCCCN1C=C[N+](=C1)C	Cl[Co-2](Cl)(Cl)Cl	1	eg	20	5	100	77.8	170	240	Pellet	3
Wang(2015) First-Row	BMIM	CrCl4	CCCCN1C=C[N+](=C1)C	Cl[Cr-](Cl)(Cl)Cl	1	eg	20	5	1.7	4.2	160	240	Pellet	3
Al-Sabagh(2014) Cu-	BMIM	Cu(Ac)3	CCCCN1C=C[N+](=C1)C	[Cu+2](CC(=O)[O-])(CC(=O)[O-])(CC(=O)[O-])	1	eg	20	2	100	50	190	240	Pellet	4	55
Wang(2015) First-Row	BMIM	CuCl4	CCCCN1C=C[N+](=C1)C	Cl[Cu-2](Cl)(Cl)Cl	1	eg	20	5	6.7	9.8	170	240	Pellet	3
Wang(2010) Fe	BMIM	FeCl4	CCCCN1C=C[N+](=C1)C	Cl[Fe-](Cl)(Cl)Cl	1	eg	20	5	1.8	9.9	140	240	Pellet	3
Wang(2010) Fe	BMIM	FeCl4	CCCCN1C=C[N+](=C1)C	Cl[Fe-](Cl)(Cl)Cl	1	eg	20	5	16.5	76.4	150	240	Pellet	3
Wang(2010) Fe	BMIM	FeCl4	CCCCN1C=C[N+](=C1)C	Cl[Fe-](Cl)(Cl)Cl	1	eg	20	5	55.1	69.5	160	240	Pellet	3
Wang(2010) Fe	BMIM	FeCl4	CCCCN1C=C[N+](=C1)C	Cl[Fe-](Cl)(Cl)Cl	1	eg	20	5	88.6	62.8	170	240	Pellet	3
Wang(2010) Fe	BMIM	FeCl4	CCCCN1C=C[N+](=C1)C	Cl[Fe-](Cl)(Cl)Cl	1	eg	20	5	100	59.2	178	240	Pellet	3
Wang(2015) First-Row	BMIM	FeCl4	CCCCN1C=C[N+](=C1)C	Cl[Fe-](Cl)(Cl)Cl	1	eg	20	5	94.7	58.9	170	240	Pellet	3
Wang(2013) 1-Allyl-3-methylimidazolium	BMIM	FeCl4	CCCCN1C=C[N+](=C1)C	Cl[Fe-](Cl)(Cl)Cl	1	eg	20	5	100	59.2	178	240	Pellet	3
Wang(2015) First-Row	BMIM	MnCl3	CCCCN1C=C[N+](=C1)C	Cl[Mn-](Cl)Cl	1	eg	20	5	86.7	72.1	170	240	Pellet	3
Wang(2015) First-Row	BMIM	NiCl4	CCCCN1C=C[N+](=C1)C	Cl[Ni-2](Cl)(Cl)Cl	1	eg	20	5	45	64.3	170	240	Pellet	3
Al-Sabagh(2014) Cu-	BMIM	Zn(Ac)3	CCCCN1C=C[N+](=C1)C	[Zn+2](CC(=O)[O-])(CC(=O)[O-])(CC(=O)[O-])	1	eg	20	2	100	36	190	240	Pellet	4	38
Wang(2015) First-Row	BMIM	ZnCl4	CCCCN1C=C[N+](=C1)C	Cl[Zn-2](Cl)(Cl)Cl	1	eg	20	5	99.6	77.4	170	240	Pellet	3
Wang(2009) GlycoLysis	BMIM	Br	CCCCN1C=C[N+](=C1)C	[Br-]	1	eg	20	5	98.7		180	480	Pellet	3
Wang(2009) GlycoLysis	BMIM	Cl	CCCCN1C=C[N+](=C1)C	[Cl-]	1	eg	20	5	44.7	53.7	180	480	Pellet	3
Wang(2009) Glycolysis	BMIM	H2PO4	CCCCN1C=C[N+](=C1)C	OP(=O)(O)[O-]	1	eg	20	5	6.9		175	480	Pellet	3
Wang(2009) Glycolysis	BMIM	HSO4	CCCCN1C=C[N+](=C1)C	OS(=O)(=O)[O-]	1	eg	20	5	0.5		170	480	Pellet	3
Liu(2020) Degradation	Ch	Ac	C[N+](C)(C)CCO	CC(=O)[O-]	1	eg	20	5	100		180	180	Powder	0.3	78
Zhou(2012) Effective	DEIM	Zn(Ac)3	CC[N]1C=C[N+](=C1)CC	[Zn+2](CC(=O)[O-])(CC(=O)[O-])(CC(=O)[O-])	1	eg	20	3	98	75	180	150	Powder	0.3
Wang(2020) GlycoLysis	DMIM	Ac	CN1C=C[N+](=C1)C	CC(=O)[O-]	1	eg	50	5	10	0	185	30	Bottle	4	0
Wang(2020) GlycoLysis	DMIM	Ac	CN1C=C[N+](=C1)C	CC(=O)[O-]	1	eg	50	5	35	31.4286	185	60	Bottle	4	11
Wang(2020) GlycoLysis	DMIM	Ac	CN1C=C[N+](=C1)C	CC(=O)[O-]	1	eg	50	5	0	0	160	60	Bottle	4	0
Wang(2020) GlycoLysis	DMIM	Ac	CN1C=C[N+](=C1)C	CC(=O)[O-]	1	eg	50	5	0	0	170	60	Bottle	4	0
Wang(2020) GlycoLysis	DMIM	Ac	CN1C=C[N+](=C1)C	CC(=O)[O-]	1	eg	50	5	20	0	180	60	Bottle	4	0
Wang(2020) GlycoLysis	DMIM	Ac	CN1C=C[N+](=C1)C	CC(=O)[O-]	1	eg	50	5	38	31.5789	185	60	Bottle	4	12
Wang(2020) GlycoLysis	DMIM	Ac	CN1C=C[N+](=C1)C	CC(=O)[O-]	1	eg	50	5	62	35.4839	190	60	Bottle	4	22
Wang(2020) GlycoLysis	DMIM	Ac	CN1C=C[N+](=C1)C	CC(=O)[O-]	1	eg	50	5	68	38.2353	195	60	Bottle	4	26
Wang(2020) GlycoLysis	DMIM	Ac	CN1C=C[N+](=C1)C	CC(=O)[O-]	1	eg	50	5	66	39.3939	200	60	Bottle	4	26
Wang(2020) GlycoLysis	DMIM	Ac	CN1C=C[N+](=C1)C	CC(=O)[O-]	1	eg	50	5	79	40.5063	185	120	Bottle	4	32
Wang(2020) GlycoLysis	DMIM	Ac	CN1C=C[N+](=C1)C	CC(=O)[O-]	1	eg	50	5	100	42	185	180	Bottle	4	42
Wang(2020) GlycoLysis	DMIM	Ac	CN1C=C[N+](=C1)C	CC(=O)[O-]	1	eg	50	5	100	43	185	260	Bottle	4	43
Al-Sabagh(2014) GlycoLysis	BMIM	Ac	CCCCN1C=C[N+](=C1)C	CC(=O)[O-]	1.5	eg	20	2	55.05	10.29	180	120	Pellet	4
Al-Sabagh(2014) Cu-	BMIM	Cu(Ac)3	CCCCN1C=C[N+](=C1)C	[Cu+2](CC(=O)[O-])(CC(=O)[O-])(CC(=O)[O-])	1.5	eg	20	2	50	20	180	120	Pellet	4	10
Al-Sabagh(2014) Cu-	BMIM	Zn(Ac)3	CCCCN1C=C[N+](=C1)C	[Zn+2](CC(=O)[O-])(CC(=O)[O-])(CC(=O)[O-])	1.5	eg	20	2	62	25	180	120	Pellet	4	17
Wang(2010) Fe	BMIM	FeCl4	CCCCN1C=C[N+](=C1)C	Cl[Fe-](Cl)(Cl)Cl	1.6	eg	20	5	72	62	160	240	Pellet	3
Wang(2015) First-Row	BMIM	CoCl4	CCCCN1C=C[N+](=C1)C	Cl[Co-2](Cl)(Cl)Cl	2	eg	20	5	100	73	170	90	Powder	0.3
Al-Sabagh(2014) GlycoLysis	BMIM	Ac	CCCCN1C=C[N+](=C1)C	CC(=O)[O-]	2	eg	20	2	44.8	4.2	180	120	Pellet	4
Al-Sabagh(2014) Cu-	BMIM	Cu(Ac)3	CCCCN1C=C[N+](=C1)C	[Cu+2](CC(=O)[O-])(CC(=O)[O-])(CC(=O)[O-])	2	eg	20	2	51	9.80392	180	120	Pellet	4	5
Al-Sabagh(2014) Cu-	BMIM	Zn(Ac)3	CCCCN1C=C[N+](=C1)C	[Zn+2](CC(=O)[O-])(CC(=O)[O-])(CC(=O)[O-])	2	eg	20	2	60	10	180	120	Pellet	4	6
Wang(2010) Fe	BMIM	FeCl4	CCCCN1C=C[N+](=C1)C	Cl[Fe-](Cl)(Cl)Cl	2	eg	20	5	82	50	160	240	Pellet	3
Wang(2009) GlycoLysis	BMIM	Cl	CCCCN1C=C[N+](=C1)C	[Cl-]	2	eg	20	5	54.1	63	180	480	Pellet	3
Zhou(2012) Effective	DEIM	Zn(Ac)3	CC[N]1C=C[N+](=C1)CC	[Zn+2](CC(=O)[O-])(CC(=O)[O-])(CC(=O)[O-])	2	eg	20	3	93	53	180	150	Powder	0.3
Wang(2015) First-Row	BMIM	CoCl4	CCCCN1C=C[N+](=C1)C	Cl[Co-2](Cl)(Cl)Cl	2.5	eg	20	5	100	71	170	90	Powder	0.3
Al-Sabagh(2014) GlycoLysis	BMIM	Ac	CCCCN1C=C[N+](=C1)C	CC(=O)[O-]	2.5	eg	20	2	42.5	3.2	180	120	Pellet	4
Al-Sabagh(2014) Cu-	BMIM	Cu(Ac)3	CCCCN1C=C[N+](=C1)C	[Cu+2](CC(=O)[O-])(CC(=O)[O-])(CC(=O)[O-])	2.5	eg	20	2	45	6.66667	180	120	Pellet	4	3
Al-Sabagh(2014) Cu-	BMIM	Zn(Ac)3	CCCCN1C=C[N+](=C1)C	[Zn+2](CC(=O)[O-])(CC(=O)[O-])(CC(=O)[O-])	2.5	eg	20	2	57	5.26316	180	120	Pellet	4	3
Al-Sabagh(2014) GlycoLysis	BMIM	Ac	CCCCN1C=C[N+](=C1)C	CC(=O)[O-]	3	eg	20	2	41.5	0.7	180	120	Pellet	4
Al-Sabagh(2014) Cu-	BMIM	Cu(Ac)3	CCCCN1C=C[N+](=C1)C	[Cu+2](CC(=O)[O-])(CC(=O)[O-])(CC(=O)[O-])	3	eg	20	2	35	0	180	120	Pellet	4
Al-Sabagh(2014) Cu-	BMIM	Zn(Ac)3	CCCCN1C=C[N+](=C1)C	[Zn+2](CC(=O)[O-])(CC(=O)[O-])(CC(=O)[O-])	3	eg	20	2	58	0	180	120	Pellet	4
Wang(2009) GlycoLysis	BMIM	Cl	CCCCN1C=C[N+](=C1)C	[Cl-]	3	eg	20	5	66.9	59.9	180	480	Pellet	3
Wang(2009) GlycoLysis	BMIM	Cl	CCCCN1C=C[N+](=C1)C	[Cl-]	4	eg	20	5	50	77	180	300	Pellet	3
Wang(2009) GlycoLysis	BMIM	Cl	CCCCN1C=C[N+](=C1)C	[Cl-]	4	eg	20	5	56	93	180	360	Pellet	3
Wang(2009) GlycoLysis	BMIM	Cl	CCCCN1C=C[N+](=C1)C	[Cl-]	4	eg	20	5	66	82	180	420	Pellet	3
Wang(2009) GlycoLysis	BMIM	Cl	CCCCN1C=C[N+](=C1)C	[Cl-]	4	eg	20	5	70.1	59.4	180	480	Pellet	3
Wang(2009) GlycoLysis	BMIM	Cl	CCCCN1C=C[N+](=C1)C	[Cl-]	4	eg	20	5	0	0	160	480	Pellet	3
Wang(2009) GlycoLysis	BMIM	Cl	CCCCN1C=C[N+](=C1)C	[Cl-]	4	eg	20	5	18	10	170	480	Pellet	3
Wang(2009) GlycoLysis	BMIM	Cl	CCCCN1C=C[N+](=C1)C	[Cl-]	4	eg	20	5	100	70	190	480	Pellet	3
Wang(2009) GlycoLysis	BMIM	Cl	CCCCN1C=C[N+](=C1)C	[Cl-]	4	eg	20	5	100	75	195	480	Pellet	3
Wang(2009) GlycoLysis	BMIM	Cl	CCCCN1C=C[N+](=C1)C	[Cl-]	4	eg	20	5	80	62	180	540	Pellet	3
Wang(2009) GlycoLysis	BMIM	Cl	CCCCN1C=C[N+](=C1)C	[Cl-]	4	eg	20	5	98	50	180	600	Pellet	3

## Sheet: Comparison_Exp-Pred
cation_name	anion_name	cation_smiles	anion_smiles	catalyst_amount	solvent	solvent_amount	temperature_c	reaction_time_min	PET_source	PET_size_mm	yield	yield pred	cost	co2e	cost_solvent	cost_catalyst	cost_utilities	KPI
-	-	-	-	ratio to PET	-	ratio to PET	C	min	1:powder, 0:pellet, -1:bottle	mm	%	%	USD/tonBHET	ton/tonBHET	USD/tonBHET	USD/tonBHET	USD/tonBHET	0.5cost(USD) + 0.5co2(kg)
Ch	ZnCl3	C[N+](C)(C)CCO	Cl[Zn-](Cl)Cl	0.02	eg	4	190	90	1	0.075	47.3976	76.5136	481.777	1.51612	353.452	60.4081	67.9174	998.948
Ch	ZnCl3	C[N+](C)(C)CCO	Cl[Zn-](Cl)Cl	0.02	eg	4	190	90	1	0.075	57.04	76.5136	400.334	1.25982	293.702	50.1963	56.4362	830.079
Ch	ZnCl3	C[N+](C)(C)CCO	Cl[Zn-](Cl)Cl	0.02	eg	4	190	90	1	0.075	54.0771	76.5136	422.269	1.32885	309.794	52.9467	59.5284	875.56
Ch	ZnCl4	C[N+](C)(C)CCO	Cl[Zn-2](Cl)(Cl)Cl	0.02	eg	4	190	90	1	0.075	53.4327	76.2237	433.689	1.34488	313.53	59.9128	60.2463	889.283
Ch	ZnCl4	C[N+](C)(C)CCO	Cl[Zn-2](Cl)(Cl)Cl	0.02	eg	4	190	90	1	0.075	63.5584	76.2237	364.597	1.13062	263.581	50.3679	50.6483	747.609
Ch	ZnCl4	C[N+](C)(C)CCO	Cl[Zn-2](Cl)(Cl)Cl	0.02	eg	4	190	90	1	0.075	51.9959	76.2237	445.674	1.38204	322.194	61.5684	61.911	913.857
N1111	ZnCl3	C[N+](C)(C)C	Cl[Zn-](Cl)Cl	0.02	eg	4	190	90	1	0.075	74.9082	75.5652	308.176	0.959313	223.644	41.5571	42.9742	633.744
N1111	ZnCl3	C[N+](C)(C)C	Cl[Zn-](Cl)Cl	0.02	eg	4	190	90	1	0.075	75.3699	75.5652	306.288	0.953437	222.274	41.3026	42.711	629.862
N1111	ZnCl3	C[N+](C)(C)C	Cl[Zn-](Cl)Cl	0.02	eg	4	190	90	1	0.075	70.0967	75.5652	329.329	1.02516	238.995	44.4097	45.924	677.245
N1111	ZnCl4	C[N+](C)(C)C	Cl[Zn-2](Cl)(Cl)Cl	0.02	eg	4	190	90	1	0.075	74.3939	74.9158	316.939	0.965945	225.19	48.4773	43.2713	641.442
N1111	ZnCl4	C[N+](C)(C)C	Cl[Zn-2](Cl)(Cl)Cl	0.02	eg	4	190	90	1	0.075	63.355	74.9158	372.162	1.13425	264.427	56.9239	50.8108	753.205
N1111	ZnCl4	C[N+](C)(C)C	Cl[Zn-2](Cl)(Cl)Cl	0.02	eg	4	190	90	1	0.075	62.306	74.9158	378.428	1.15335	268.879	57.8823	51.6663	765.887
TMG	ZnCl4	[N+]=C(N(C)C)N(C)C	Cl[Zn-2](Cl)(Cl)Cl	0.02	eg	4	190	90	1	0.075	50.3144	76.1196	493.562	1.42823	332.962	96.6195	63.9802	960.895
TMG	ZnCl4	[N+]=C(N(C)C)N(C)C	Cl[Zn-2](Cl)(Cl)Cl	0.02	eg	4	190	90	1	0.075	77.3333	76.1196	321.119	0.929229	216.631	62.8623	41.6266	625.174
TMG	ZnCl4	[N+]=C(N(C)C)N(C)C	Cl[Zn-2](Cl)(Cl)Cl	0.02	eg	4	190	90	1	0.075	51.2056	76.1196	484.971	1.40337	327.167	94.9379	62.8666	944.171
Ch	ZnCl3	C[N+](C)(C)CCO	Cl[Zn-](Cl)Cl	0.02	eg	4	190	90	-1	5	73.7478	77.7569	309.638	0.974407	227.163	38.8242	43.6504	642.023
Ch	ZnCl3	C[N+](C)(C)CCO	Cl[Zn-](Cl)Cl	0.02	eg	4	190	90	-1	5	72.7465	77.7569	313.9	0.987819	230.29	39.3586	44.2512	650.859
Ch	ZnCl3	C[N+](C)(C)CCO	Cl[Zn-](Cl)Cl	0.02	eg	4	190	90	-1	5	77.5157	77.7569	294.587	0.927044	216.121	36.9371	41.5287	610.815
Ch	ZnCl4	C[N+](C)(C)CCO	Cl[Zn-2](Cl)(Cl)Cl	0.02	eg	4	190	90	-1	5	75.6195	77.2272	306.445	0.950289	221.54	42.3343	42.57	628.367
Ch	ZnCl4	C[N+](C)(C)CCO	Cl[Zn-2](Cl)(Cl)Cl	0.02	eg	4	190	90	-1	5	85.447	77.2272	271.2	0.840993	196.06	37.4653	37.6739	556.096
Ch	ZnCl4	C[N+](C)(C)CCO	Cl[Zn-2](Cl)(Cl)Cl	0.02	eg	4	190	90	-1	5	78.3606	77.2272	295.725	0.917047	213.791	40.8535	41.0808	606.386
N1111	ZnCl3	C[N+](C)(C)C	Cl[Zn-](Cl)Cl	0.02	eg	4	190	90	-1	5	74.8784	76.4679	308.298	0.959694	223.733	41.5736	42.9913	633.996
N1111	ZnCl3	C[N+](C)(C)C	Cl[Zn-](Cl)Cl	0.02	eg	4	190	90	-1	5	76.2927	76.4679	302.583	0.941904	219.585	40.803	42.1943	622.243
N1111	ZnCl3	C[N+](C)(C)C	Cl[Zn-](Cl)Cl	0.02	eg	4	190	90	-1	5	72.7319	76.4679	317.397	0.988018	230.336	42.8006	44.2601	652.707
N1111	ZnCl4	C[N+](C)(C)C	Cl[Zn-2](Cl)(Cl)Cl	0.02	eg	4	190	90	-1	5	72.3225	74.6832	326.016	0.99361	231.64	49.8657	44.5106	659.813
N1111	ZnCl4	C[N+](C)(C)C	Cl[Zn-2](Cl)(Cl)Cl	0.02	eg	4	190	90	-1	5	78.8213	74.6832	299.136	0.911687	212.541	45.7543	40.8407	605.412
N1111	ZnCl4	C[N+](C)(C)C	Cl[Zn-2](Cl)(Cl)Cl	0.02	eg	4	190	90	-1	5	73.1508	74.6832	322.325	0.98236	229.017	49.3011	44.0067	652.343
TMG	ZnCl4	[N+]=C(N(C)C)N(C)C	Cl[Zn-2](Cl)(Cl)Cl	0.02	eg	4	190	90	-1	5	67.7372	77.201	366.612	1.06087	247.32	71.7678	47.5237	713.741
TMG	ZnCl4	[N+]=C(N(C)C)N(C)C	Cl[Zn-2](Cl)(Cl)Cl	0.02	eg	4	190	90	-1	5	76.1813	77.201	325.976	0.943281	219.907	63.8129	42.2561	634.629
TMG	ZnCl4	[N+]=C(N(C)C)N(C)C	Cl[Zn-2](Cl)(Cl)Cl	0.02	eg	4	190	90	-1	5	69.9199	77.201	355.167	1.02775	239.599	69.5274	46.0401	691.46
EMIM	ZnCl3	CCN1C=C[N+](=C1)C	Cl[Zn-](Cl)Cl	0.02	eg	4	190	90	-1	5	80.0094	71.281	280.685	0.89815	209.385	31.0651	40.2343	589.417
EMIM	ZnCl3	CCN1C=C[N+](=C1)C	Cl[Zn-](Cl)Cl	0.02	eg	4	190	90	-1	5	73.7949	71.281	304.322	0.973786	227.018	33.6812	43.6226	639.054
EMIM	ZnCl3	CCN1C=C[N+](=C1)C	Cl[Zn-](Cl)Cl	0.02	eg	4	190	90	-1	5	77.3294	71.281	290.412	0.929277	216.642	32.1418	41.6287	609.845
EMIM	ZnCl4	CCN1C=C[N+](=C1)C	Cl[Zn-2](Cl)(Cl)Cl	0.02	eg	4	190	90	-1	5	72.9902	71.2715	310.536	0.984522	229.521	36.9111	44.1035	647.529	0
EMIM	ZnCl4	CCN1C=C[N+](=C1)C	Cl[Zn-2](Cl)(Cl)Cl	0.02	eg	4	190	90	-1	5	79.6384	71.2715	284.612	0.902334	210.361	33.8298	40.4217	593.473
EMIM	ZnCl4	CCN1C=C[N+](=C1)C	Cl[Zn-2](Cl)(Cl)Cl	0.02	eg	4	190	90	-1	5	73.0385	71.2715	310.33	0.983871	229.369	36.8867	44.0743	647.1
EMIM	ZnCl3	CCN1C=C[N+](=C1)C	Cl[Zn-](Cl)Cl	0.02	eg	4	190	90	1	0.075	54.2453	61.6342	413.997	1.32473	308.834	45.8197	59.3438	869.364	0
EMIM	ZnCl3	CCN1C=C[N+](=C1)C	Cl[Zn-](Cl)Cl	0.02	eg	4	190	90	1	0.075	64.3083	61.6342	349.215	1.11744	260.507	38.6498	50.0576	733.325
EMIM	ZnCl4	CCN1C=C[N+](=C1)C	Cl[Zn-2](Cl)(Cl)Cl	0.02	eg	4	190	90	1	0.075	56.7275	55.8629	399.56	1.26676	295.32	47.4928	56.7471	833.162
EMIM	ZnCl4	CCN1C=C[N+](=C1)C	Cl[Zn-2](Cl)(Cl)Cl	0.02	eg	4	190	90	1	0.075	50.4046	55.8629	449.682	1.42567	332.366	53.4505	63.8656	937.677

## Sheet: KPI_Literature
cation_name	anion_name	IL_smiles	catalyst_amount	solvent_amount	temperature_c	reaction_time_min	PET_source	PET_size_mm	catalyst_price	yield	cost	co2e	cost_solvent	cost_catalyst	cost_utilities	KPI
-	-	-	ratio to PET	ratio to PET	C	min	1:powder, 0:pellet, -1:bottle	mm	USD/ton	fraction	USD/tonBHET	ton/tonBHET	USD/tonBHET	USD/tonBHET	USD/tonBHET	0.5cost(USD) + 0.5co2(kg)
Ch	Gly	C[N+](C)(C)CCO.C(C(=O)[O-])N	0.05	4	190	90	-1	10	2584	0.845	361.521	0.984	198.258	116.431	46.8316	672.76
BMIM	CoCl4	CCCCN1C=C[N+](=C1)C.Cl[Co-2](Cl)(Cl)Cl	0.0714286	2.85714	175	90	1	0.3	4011	0.72	517.041	1.02885	166.198	303.009	47.8339	772.944
AMIM	ZnCl3	C[N+]1=CN(C=C1)CC=C.Cl[Zn-](Cl)Cl	0.1	4	175	75	0	3	1852	0.801	423.256	1.1573	209.148	176.065	38.043	790.28
BMIM	Pro	CCCCN1C=C[N+](=C1)C.CCC(=O)[O-]	0.05	4	190	60	1	0.3	7507	0.75	634.968	0.968856	223.37	381.1	30.4979	801.912
Ch	Ac	C[N+](C)(C)CCO.CC(=O)[O-]	0.05	4	180	120	1	0.3	2054	0.78	391.263	1.22703	214.779	100.263	76.2209	809.146
BMIM	CoCl4	CCCCN1C=C[N+](=C1)C.Cl[Co-2](Cl)(Cl)Cl	0.0833333	3.33333	175	90	1	0.3	4011	0.78	552.004	1.07858	178.983	326.318	46.7035	815.291
BMIM	CoCl4	CCCCN1C=C[N+](=C1)C.Cl[Co-2](Cl)(Cl)Cl	0.05	4	170	90	1	0.3	4011	0.663	537.085	1.10648	252.681	230.342	54.0618	821.784
Ch	Ac	C[N+](C)(C)CCO.CC(=O)[O-]	0.05	4	180	60	1	0.3	2054	0.6	447.4	1.2097	279.213	130.342	37.8458	828.549
Ch	Cl	C[N+](C)(C)CCO.[Cl-]	0.05	4	190	90	-1	10	2238	0.672	434.973	1.23723	249.297	126.802	58.8739	836.101
BMIM	CoCl4	CCCCN1C=C[N+](=C1)C.Cl[Co-2](Cl)(Cl)Cl	0.1	4	170	90	1	0.3	4011	0.8188	621.425	1.08196	204.602	373.026	43.7981	851.695
N1111	Ala	C[N+](C)(C)C.CC(C(=O)[O-])N	0.1	4	170	50	-1	5	3946	0.746	649.798	1.09424	224.568	402.793	22.4371	872.018
TMG	ZnCl3	[N+]=C(N(C)C)N(C)C.Cl[Zn-](Cl)Cl	0.1	5	195	70	1	0.3	2717	0.845	529.907	1.23215	247.822	244.848	37.237	881.027
C2TMG	ZnCl3	CC[N+]=C(N(C)C)N(C)C.Cl[Zn-](Cl)Cl	0.1	5	195	70	1	0.3	3383	0.866	575.601	1.20214	241.813	297.473	36.3151	888.873
C6TMG	ZnCl3	CCCCCC[N+]=C(N(C)C)N(C)C.Cl[Zn-](Cl)Cl	0.1	5	195	70	1	0.3	4853	0.927	658.461	1.12293	225.9	398.653	33.9081	890.694
AMIM	MnCl3	C[N+]1=CN(C=C1)CC=C.Cl[Mn-](Cl)Cl	0.1	4	175	90	0	3	1989	0.746	480.152	1.31629	224.568	203.03	52.5542	898.22
BMIM	Ac	CCCCN1C=C[N+](=C1)C.CC(=O)[O-]	0.05	4	190	90	1	0.3	1519	0.6	441.524	1.38557	279.213	96.3919	65.9188	913.545
C6TMG	ZnCl3	CCCCCC[N+]=C(N(C)C)N(C)C.Cl[Zn-](Cl)Cl	0.1	5	195	70	1	0.3	4853	0.894	682.785	1.16449	234.239	413.368	35.1777	923.639
BMIM	CoCl4	CCCCN1C=C[N+](=C1)C.Cl[Co-2](Cl)(Cl)Cl	0.1	4	175	90	1	0.3	4011	0.8	640.21	1.22745	209.41	381.792	49.0087	933.831
BMIM	Lys	CCCCN1C=C[N+](=C1)C.C(CCN)CC(C(=O)[O-])N	0.05	4	190	120	1	0.3	1627	0.664	435.603	1.44372	252.301	93.294	90.0081	939.661
Ch	Ac	C[N+](C)(C)CCO.CC(=O)[O-]	0.05	4	195	180	1	0.3	2054	0.86	414.721	1.49001	194.8	90.936	128.985	952.364
AMIM	CoCl3	C[N+]1=CN(C=C1)CC=C.Cl[Co-](Cl)Cl	0.1	4	175	75	0	3	5132	0.795	740.624	1.16603	210.727	491.568	38.3289	953.327
BMIM	Ala	CCCCN1C=C[N+](=C1)C.CC(C(=O)[O-])N	0.05	4	190	120	1	0.3	2736	0.676	490.333	1.41809	247.822	154.1	88.4104	954.212
TMG	FeCl4	[N+]=C(N(C)C)N(C)C.Cl[Fe-](Cl)(Cl)Cl	0.1	5	195	70	1	0.3	3098	0.792	601.98	1.31447	264.406	297.866	39.7082	958.223
BMIM	CoCl4	CCCCN1C=C[N+](=C1)C.Cl[Co-2](Cl)(Cl)Cl	0.1	4	170	90	1	0.3	4011	0.7268	700.088	1.21892	230.5	420.244	49.3434	959.505
Ch	Ac	C[N+](C)(C)CCO.CC(=O)[O-]	0.05	4	190	180	1	0.3	2054	0.85	419.345	1.50629	197.091	92.0059	130.247	962.819
BMIM	CoCl4	CCCCN1C=C[N+](=C1)C.Cl[Co-2](Cl)(Cl)Cl	0.1	4	175	90	1	0.3	4011	0.77	665.109	1.27498	217.568	396.667	50.8737	970.046
Ch	For	C[N+](C)(C)CCO.C(=O)[O-]	0.05	4	180	180	-1	10	2256	0.845	430.384	1.5125	198.258	101.652	130.474	971.443
Ch	For	C[N+](C)(C)CCO.C(=O)[O-]	0.05	4	180	180	1	0.3	2256	0.845	430.384	1.5125	198.258	101.652	130.474	971.443
BMIM	CoCl4	CCCCN1C=C[N+](=C1)C.Cl[Co-2](Cl)(Cl)Cl	0.1	4	170	90	1	0.3	4011	0.7161	710.549	1.23714	233.945	426.524	50.0807	973.842
BMIM	Pro	CCCCN1C=C[N+](=C1)C.CCC(=O)[O-]	0.05	4	190	120	1	0.3	7507	0.755	679.627	1.26971	221.891	378.576	79.1595	974.668
C4TMG	ZnCl3	CCCC[N+]=C(N(C)C)N(C)C.Cl[Zn-](Cl)Cl	0.1	5	195	70	1	0.3	4096	0.814	679.054	1.27882	257.26	383.177	38.6172	978.939
BMIM	CoCl4	CCCCN1C=C[N+](=C1)C.Cl[Co-2](Cl)(Cl)Cl	0.1	4	175	90	1	0.3	4011	0.76	673.894	1.29198	220.431	401.886	51.5766	982.936
C6TMG	ZnCl3	CCCCCC[N+]=C(N(C)C)N(C)C.Cl[Zn-](Cl)Cl	0.1	5	195	70	-1	10	4853	0.84	726.678	1.23935	249.297	439.942	37.4391	983.016
Ch	Ac	C[N+](C)(C)CCO.CC(=O)[O-]	0.05	4	180	180	-1	10	2054	0.829	429.402	1.54162	202.084	94.3365	132.981	985.509
Ch	Ac	C[N+](C)(C)CCO.CC(=O)[O-]	0.05	4	180	180	1	0.3	2054	0.829	429.413	1.54169	202.084	94.3365	132.992	985.553
Ch	Ac	C[N+](C)(C)CCO.CC(=O)[O-]	0.05	4	180	180	1	0.3	2054	0.82	434.126	1.55861	204.302	95.3719	134.452	996.37
Ch	Ac	C[N+](C)(C)CCO.CC(=O)[O-]	0.05	4	180	180	1	0.3	2054	0.82	434.126	1.55861	204.302	95.3719	134.452	996.37
Ch	Ac	C[N+](C)(C)CCO.CC(=O)[O-]	0.05	4	180	180	1	0.3	2054	0.82	434.126	1.55861	204.302	95.3719	134.452	996.37
BMIM	CoCl4	CCCCN1C=C[N+](=C1)C.Cl[Co-2](Cl)(Cl)Cl	0.1	4	180	90	1	0.3	4011	0.75	683.042	1.31002	223.37	407.245	52.4273	996.529
N1111	Asp	C[N+](C)(C)C.C(C(C(=O)[O-])N)C(=O)O	0.1	4	170	60	-1	5	5793	0.727	866.18	1.14615	230.437	606.783	28.96	1006.16
BMIM	CoCl4	CCCCN1C=C[N+](=C1)C.Cl[Co-2](Cl)(Cl)Cl	0.1	4	170	120	1	0.3	4011	0.7392	712.198	1.30024	226.634	413.195	72.3699	1006.22
N2222	Ala	CC[N+](CC)(CC)CC.CC(C(=O)[O-])N	0.1	4	170	50	-1	5	6519	0.743	916.138	1.09867	225.475	668.123	22.5408	1007.4
BMIM	CoCl4	CCCCN1C=C[N+](=C1)C.Cl[Co-2](Cl)(Cl)Cl	0.1	4	185	90	1	0.3	4011	0.74	692.405	1.32832	226.389	412.748	53.2678	1010.36
BMIM	CoCl4	CCCCN1C=C[N+](=C1)C.Cl[Co-2](Cl)(Cl)Cl	0.02	4	170	90	1	0.3	4011	0.4368	605.443	1.47028	383.534	139.851	82.058	1037.86
TMG	CoCl3	[N+]=C(N(C)C)N(C)C.Cl[Co-](Cl)Cl	0.1	5	195	70	1	0.3	6124	0.816	866.66	1.27581	256.629	571.491	38.5403	1071.23
C8TMG	ZnCl3	CCCCCCCC[N+]=C(N(C)C)N(C)C.Cl[Zn-](Cl)Cl	0.1	5	195	70	1	0.3	5644	0.787	852.161	1.32288	266.086	546.105	39.9697	1087.52
BMIM	CoCl4	CCCCN1C=C[N+](=C1)C.Cl[Co-2](Cl)(Cl)Cl	0.1	4	170	150	1	0.3	4011	0.7448	734.44	1.4408	224.93	410.088	99.4221	1087.62
BMIM	CoCl4	CCCCN1C=C[N+](=C1)C.Cl[Co-2](Cl)(Cl)Cl	0.1	5	175	90	1	0.3	4011	0.77	724.962	1.4504	271.961	396.667	56.3349	1087.68
BMIM	Leu	CCCCN1C=C[N+](=C1)C.CC(C)CC(C(=O)[O-])N	0.05	4	190	120	1	0.3	5237	0.634	673.011	1.51203	264.239	314.505	94.2672	1092.52
N2222	Asp	CC[N+](CC)(CC)CC.C(C(C(=O)[O-])N)C(=O)O	0.1	4	170	60	-1	5	7540	0.725	1052.06	1.14931	231.073	791.949	29.0399	1100.69
Ch	Ac	C[N+](C)(C)CCO.CC(=O)[O-]	0.05	4	180	30	1	0.3	2054	0.4	638.318	1.60947	418.819	195.512	23.9866	1123.9
Ch	Ac	C[N+](C)(C)CCO.CC(=O)[O-]	0.1	4	180	180	1	0.3	2054	0.81	536.007	1.76569	206.824	193.099	136.083	1150.85
N2222	Ser	CC[N+](CC)(CC)CC.C(C(C(=O)[O-])N)O	0.1	4	170	120	-1	5	6118	0.714	962.089	1.34645	234.633	652.492	74.9645	1154.27
BMIM	CoCl4	CCCCN1C=C[N+](=C1)C.Cl[Co-2](Cl)(Cl)Cl	0.125	5	175	90	1	0.3	4011	0.79	803.288	1.51022	265.076	483.281	54.9313	1156.75
Ch	Ac	C[N+](C)(C)CCO.CC(=O)[O-]	0.05	4	175	180	1	0.3	2054	0.7	508.222	1.82418	239.325	111.721	157.175	1166.2
BMIM	CoCl4	CCCCN1C=C[N+](=C1)C.Cl[Co-2](Cl)(Cl)Cl	0.1	6	175	90	1	0.3	4011	0.79	764.944	1.5846	318.091	386.625	60.2284	1174.77
BMIM	CoCl4	CCCCN1C=C[N+](=C1)C.Cl[Co-2](Cl)(Cl)Cl	0.1	4	170	180	1	0.3	4011	0.7326	778.556	1.64736	228.676	416.917	132.963	1212.96
DEIM	Zn(Ac)3	CC[N]1C=C[N+](=C1)CC.[Zn+2](CC(=O)[O-])(CC(=O)[O-])(CC(=O)[O-])	0.0833333	3.33333	180	150	1	0.3	2272	0.58342	620.529	1.89382	239.29	247.121	134.118	1257.17
BMIM	CoCl4	CCCCN1C=C[N+](=C1)C.Cl[Co-2](Cl)(Cl)Cl	0.1	7	175	90	1	0.3	4011	0.8	812.998	1.73363	366.467	381.792	64.7391	1273.32
Ch	Ac	C[N+](C)(C)CCO.CC(=O)[O-]	0.05	4	165	180	1	0.3	2054	0.54	635.741	1.93246	310.237	144.824	180.68	1284.1

## Sheet: KPI_Screen
cation_name	anion_name	IL_smiles	catalyst_amount	solvent_amount	temperature_c	reaction_time_min	PET_source	PET_size_mm	catalyst_price	yield	cost	co2e	cost_solvent	cost_catalyst	cost_utilities	KPI
-	-	-	ratio to PET	ratio to PET	C	min	1:powder, 0:pellet, -1:bottle	mm	USD/ton	%	USD/tonBHET	ton/tonBHET	USD/tonBHET	USD/tonBHET	USD/tonBHET	0.5*cost(USD) + 0.5*co2(kg)
Ch	ZnCl3	C[N+](C)(C)CCO.Cl[Zn-](Cl)Cl	0.02	4	190	90	-1	5	1880	77.7569	293.673	0.924167	215.451	36.8225	41.3998	608.92
Ch	ZnCl4	C[N+](C)(C)CCO.Cl[Zn-2](Cl)(Cl)Cl	0.02	4	190	90	-1	5	2102	77.2272	300.065	0.930506	216.928	41.453	41.6837	615.285
TMG	ZnCl3	[N+]=C(N(C)C)N(C)C.Cl[Zn-](Cl)Cl	0.02	4	190	90	-1	5	2717	77.3044	311.882	0.929578	216.712	53.5278	41.6422	620.73
N1111	ZnCl3	C[N+](C)(C)C.Cl[Zn-](Cl)Cl	0.02	4	190	90	-1	5	2044	76.4679	301.89	0.939746	219.082	40.7095	42.0977	620.818
Ch	ZnCl3	C[N+](C)(C)CCO.Cl[Zn-](Cl)Cl	0.02	4	180	90	-1	5	1880	75.7283	301.454	0.948498	221.222	37.8089	42.4232	624.976
TMG	ZnCl4	[N+]=C(N(C)C)N(C)C.Cl[Zn-2](Cl)(Cl)Cl	0.02	4	190	90	-1	5	3192	77.201	321.67	0.930822	217.002	62.97	41.6979	626.246
C2TMG	ZnCl4	CC[N+]=C(N(C)C)N(C)C.Cl[Zn-2](Cl)(Cl)Cl	0.02	4	190	90	-1	5	3985	77.3553	336.641	0.928965	216.569	78.4571	41.6147	632.803
Ch	ZnCl4	C[N+](C)(C)CCO.Cl[Zn-2](Cl)(Cl)Cl	0.02	4	180	90	-1	5	2102	74.9943	308.913	0.957782	223.387	42.6873	42.8384	633.347
C2TMG	ZnCl3	CC[N+]=C(N(C)C)N(C)C.Cl[Zn-](Cl)Cl	0.02	4	190	90	-1	5	3383	76.4935	328.448	0.939431	219.009	67.3552	42.0836	633.94
TMG	ZnCl3	[N+]=C(N(C)C)N(C)C.Cl[Zn-](Cl)Cl	0.02	4	180	90	-1	5	2717	75.2796	320.184	0.954151	222.541	54.9675	42.676	637.167
N2222	ZnCl3	CC[N+](CC)(CC)CC.Cl[Zn-](Cl)Cl	0.02	4	190	90	-1	5	4258	77.1286	343.021	0.931695	217.206	84.0783	41.737	637.358
N1111	ZnCl4	C[N+](C)(C)C.Cl[Zn-2](Cl)(Cl)Cl	0.02	4	190	90	-1	5	2368	74.6832	315.711	0.962203	224.318	48.2895	43.1037	638.957
N1111	ZnCl3	C[N+](C)(C)C.Cl[Zn-](Cl)Cl	0.02	4	180	90	-1	5	2044	74.2426	310.851	0.967479	225.649	41.9297	43.2722	639.165
N2222	ZnCl4	CC[N+](CC)(CC)CC.Cl[Zn-2](Cl)(Cl)Cl	0.02	4	190	90	-1	5	5149	77.6947	357.987	0.924907	215.623	100.931	41.4329	641.447
TMG	ZnCl4	[N+]=C(N(C)C)N(C)C.Cl[Zn-2](Cl)(Cl)Cl	0.02	4	180	90	-1	5	3192	75.0178	330.945	0.957482	223.317	64.8026	42.825	644.213
C4TMG	ZnCl4	CCCC[N+]=C(N(C)C)N(C)C.Cl[Zn-2](Cl)(Cl)Cl	0.02	4	190	90	-1	5	4814	76.6152	356.372	0.93794	218.661	95.6942	42.0168	647.156
C2TMG	ZnCl4	CC[N+]=C(N(C)C)N(C)C.Cl[Zn-2](Cl)(Cl)Cl	0.02	4	180	90	-1	5	3985	75.2448	345.997	0.954593	222.644	80.6577	42.6958	650.295
C2TMG	ZnCl3	CC[N+]=C(N(C)C)N(C)C.Cl[Zn-](Cl)Cl	0.02	4	180	90	-1	5	3383	74.5237	337.043	0.96383	224.798	69.1356	43.109	650.436
C4TMG	ZnCl3	CCCC[N+]=C(N(C)C)N(C)C.Cl[Zn-](Cl)Cl	0.02	4	190	90	-1	5	4096	75.1794	348.633	0.955852	222.837	82.9765	42.8192	652.242
N2222	ZnCl3	CC[N+](CC)(CC)CC.Cl[Zn-](Cl)Cl	0.02	4	180	90	-1	5	4258	75.137	352.027	0.955963	222.963	86.307	42.7571	653.995
Ch	ZnCl3	C[N+](C)(C)CCO.Cl[Zn-](Cl)Cl	0.02	4	170	90	-1	5	1880	72.0653	316.687	0.996264	232.467	39.7307	44.4901	656.476
N2222	ZnCl4	CC[N+](CC)(CC)CC.Cl[Zn-2](Cl)(Cl)Cl	0.02	4	180	90	-1	5	5149	75.5721	367.956	0.950458	221.679	103.766	42.5109	659.207
DMIM	ZnCl3	CN1C=C[N+](=C1)C.Cl[Zn-](Cl)Cl	0.02	4	190	90	-1	5	1706	71.5837	315.296	1.00386	234.03	36.296	44.97	659.581
N1111	ZnCl4	C[N+](C)(C)C.Cl[Zn-2](Cl)(Cl)Cl	0.02	4	180	90	-1	5	2368	72.1261	326.814	0.995869	232.271	50.0015	44.5419	661.341
EMIM	ZnCl3	CCN1C=C[N+](=C1)C.Cl[Zn-](Cl)Cl	0.02	4	190	90	-1	5	1632	71.281	315.054	1.00813	235.024	34.8691	45.161	661.591
EMIM	ZnCl4	CCN1C=C[N+](=C1)C.Cl[Zn-2](Cl)(Cl)Cl	0.02	4	190	90	-1	5	1769	71.2715	318.024	1.00826	235.056	37.8012	45.167	663.143
Ch	ZnCl3	C[N+](C)(C)CCO.Cl[Zn-](Cl)Cl	0.04	4	190	90	-1	5	1880	78.0815	329.121	0.998346	214.555	73.3388	41.2277	663.733
C4TMG	ZnCl4	CCCC[N+]=C(N(C)C)N(C)C.Cl[Zn-2](Cl)(Cl)Cl	0.02	4	180	90	-1	5	4814	74.5686	366.066	0.96325	224.663	98.3205	43.083	664.658
C6TMG	ZnCl4	CCCCCC[N+]=C(N(C)C)N(C)C.Cl[Zn-2](Cl)(Cl)Cl	0.02	4	190	90	-1	5	5675	75.5619	378.693	0.951013	221.709	114.382	42.6024	664.853
DEIM	ZnCl4	CC[N]1C=C[N+](=C1)CC.Cl[Zn-2](Cl)(Cl)Cl	0.02	4	190	90	-1	5	1966	71.3138	322.042	1.00766	234.916	41.9859	45.1402	664.853
Ch	ZnCl4	C[N+](C)(C)CCO.Cl[Zn-2](Cl)(Cl)Cl	0.02	4	170	90	-1	5	2102	71.2366	325.118	1.00785	235.171	44.939	45.0077	666.486
DEIM	ZnCl3	CC[N]1C=C[N+](=C1)CC.Cl[Zn-](Cl)Cl	0.02	4	190	90	-1	5	1790	70.8808	320.228	1.01382	236.351	38.4608	45.416	667.024
C4TMG	ZnCl3	CCCC[N+]=C(N(C)C)N(C)C.Cl[Zn-](Cl)Cl	0.02	4	180	90	-1	5	4096	73.3626	357.178	0.979083	228.356	85.0313	43.7912	668.131
DMIM	ZnCl4	CN1C=C[N+](=C1)C.Cl[Zn-2](Cl)(Cl)Cl	0.02	4	190	90	-1	5	1877	70.8097	322.421	1.01484	236.589	40.3706	45.4616	668.629
EMIM	CoCl4	CCN1C=C[N+](=C1)C.Cl[Co-2](Cl)(Cl)Cl	0.02	4	190	90	-1	5	4435	73.6223	363.019	0.976068	227.55	91.7441	43.7248	669.543
TMG	ZnCl3	[N+]=C(N(C)C)N(C)C.Cl[Zn-](Cl)Cl	0.02	4	170	90	-1	5	2717	71.5696	336.692	1.00316	234.077	57.8169	44.7983	669.928
DMIM	CoCl4	CN1C=C[N+](=C1)C.Cl[Co-2](Cl)(Cl)Cl	0.02	4	190	90	-1	5	4734	73.7613	368.508	0.974228	227.121	97.7448	43.6424	671.368
N1111	ZnCl3	C[N+](C)(C)C.Cl[Zn-](Cl)Cl	0.02	4	170	90	-1	5	2044	70.6181	326.714	1.01668	237.23	44.0817	45.4018	671.697
C6TMG	ZnCl3	CCCCCC[N+]=C(N(C)C)N(C)C.Cl[Zn-](Cl)Cl	0.02	4	190	90	-1	5	4853	73.8444	370.548	0.973132	226.866	100.089	43.5933	671.84
Ch	ZnCl4	C[N+](C)(C)CCO.Cl[Zn-2](Cl)(Cl)Cl	0.04	4	190	90	-1	5	2102	77.5928	339.909	1.00463	215.906	82.5154	41.4873	672.271
AMIM	ZnCl3	C[N+]1=CN(C=C1)CC=C.Cl[Zn-](Cl)Cl	0.02	4	190	90	-1	5	1852	70.2794	324.312	1.0225	238.374	40.1335	45.8046	673.404
AMIM	ZnCl4	C[N+]1=CN(C=C1)CC=C.Cl[Zn-2](Cl)(Cl)Cl	0.02	4	190	90	-1	5	2047	70.4292	327.839	1.02032	237.867	44.2648	45.7072	674.08
DEIM	CoCl4	CC[N]1C=C[N+](=C1)CC.Cl[Co-2](Cl)(Cl)Cl	0.02	4	190	90	-1	5	4469	72.8538	367.559	0.986365	229.951	93.4227	44.186	676.962
N1111	ZnCl3	C[N+](C)(C)C.Cl[Zn-](Cl)Cl	0.04	4	190	90	-1	5	2044	76.8523	340.885	1.01431	217.987	81.0118	41.8871	677.599
TMG	ZnCl4	[N+]=C(N(C)C)N(C)C.Cl[Zn-2](Cl)(Cl)Cl	0.02	4	170	90	-1	5	3192	71.2337	348.435	1.0079	235.181	68.2451	45.0095	678.165
Ch	ZnCl3	C[N+](C)(C)CCO.Cl[Zn-](Cl)Cl	0.04	4	180	90	-1	5	1880	76.1192	337.521	1.02366	220.086	75.2295	42.2054	680.59
Ch	ZnCl3	C[N+](C)(C)CCO.Cl[Zn-](Cl)Cl	0.02	4	190	120	-1	5	1880	79.1671	308.748	1.05249	211.613	36.1666	60.9686	680.617
DMIM	NiCl4	CN1C=C[N+](=C1)C.Cl[Ni-2](Cl)(Cl)Cl	0.02	4	190	90	-1	5	4682	72.649	373.06	0.989145	230.599	98.1512	44.3106	681.103
C6TMG	ZnCl4	CCCCCC[N+]=C(N(C)C)N(C)C.Cl[Zn-2](Cl)(Cl)Cl	0.02	4	180	90	-1	5	5675	73.6383	388.498	0.975418	227.501	117.37	43.6272	681.958
AMIM	CoCl4	C[N+]1=CN(C=C1)CC=C.Cl[Co-2](Cl)(Cl)Cl	0.02	4	190	90	-1	5	4574	72.2594	372.796	0.994478	231.842	96.4042	44.5495	683.637
C2TMG	ZnCl3	CC[N+]=C(N(C)C)N(C)C.Cl[Zn-](Cl)Cl	0.02	4	170	90	-1	5	3383	70.8633	354.361	1.01316	236.41	72.7067	45.2448	683.762
C8TMG	ZnCl4	CCCCCCCC[N+]=C(N(C)C)N(C)C.Cl[Zn-2](Cl)(Cl)Cl	0.02	4	190	90	-1	5	6559	74.454	402.411	0.965165	225.008	134.166	43.2364	683.788
TMG	ZnCl3	[N+]=C(N(C)C)N(C)C.Cl[Zn-](Cl)Cl	0.04	4	190	90	-1	5	2717	77.6162	363.942	1.00433	215.841	106.626	41.4748	684.136
C2TMG	ZnCl4	CC[N+]=C(N(C)C)N(C)C.Cl[Zn-2](Cl)(Cl)Cl	0.02	4	170	90	-1	5	3985	71.4342	364.364	1.00507	234.52	84.9603	44.8832	684.715
EMIM	NiCl4	CCN1C=C[N+](=C1)C.Cl[Ni-2](Cl)(Cl)Cl	0.02	4	190	90	-1	5	4386	71.8228	371.075	1.00052	233.251	93.0037	44.8203	685.799
Ch	ZnCl4	C[N+](C)(C)CCO.Cl[Zn-2](Cl)(Cl)Cl	0.02	4	190	120	-1	5	2102	78.7721	314.588	1.05776	212.674	40.64	61.2743	686.176
C6TMG	ZnCl3	CCCCCC[N+]=C(N(C)C)N(C)C.Cl[Zn-](Cl)Cl	0.02	4	180	90	-1	5	4853	72.2674	378.544	0.993921	231.816	102.273	44.4548	686.233
N2222	ZnCl3	CC[N+](CC)(CC)CC.Cl[Zn-](Cl)Cl	0.02	4	170	90	-1	5	4258	71.4394	370.157	1.00499	234.503	90.7741	44.8799	687.575
C8TMG	ZnCl3	CCCCCCCC[N+]=C(N(C)C)N(C)C.Cl[Zn-](Cl)Cl	0.02	4	190	90	-1	5	5644	72.6515	393.214	0.989111	230.591	118.314	44.3091	691.162
Ch	ZnCl4	C[N+](C)(C)CCO.Cl[Zn-2](Cl)(Cl)Cl	0.04	4	180	90	-1	5	2102	75.4055	349.683	1.03335	222.169	84.9089	42.6048	691.515
N1111	ZnCl3	C[N+](C)(C)C.Cl[Zn-](Cl)Cl	0.02	4	190	120	-1	5	2044	78.0798	316.246	1.06714	214.56	39.8691	61.8177	691.695
TMG	ZnCl3	[N+]=C(N(C)C)N(C)C.Cl[Zn-](Cl)Cl	0.02	4	190	120	-1	5	2717	78.6894	326.822	1.05888	212.897	52.5857	61.3388	692.849
N2222	ZnCl4	CC[N+](CC)(CC)CC.Cl[Zn-2](Cl)(Cl)Cl	0.02	4	170	90	-1	5	5149	71.7585	387.422	1.00052	233.461	109.281	44.6804	693.973
TMG	ZnCl4	[N+]=C(N(C)C)N(C)C.Cl[Zn-2](Cl)(Cl)Cl	0.04	4	190	90	-1	5	3192	77.5534	382.892	1.00514	216.016	125.368	41.5085	694.018
Ch	ZnCl3	C[N+](C)(C)CCO.Cl[Zn-](Cl)Cl	0.02	4	180	120	-1	5	1880	77.3728	315.798	1.07635	216.52	37.0053	62.2725	696.072
N1111	ZnCl3	C[N+](C)(C)C.Cl[Zn-](Cl)Cl	0.04	4	180	90	-1	5	2044	74.6649	350.785	1.0436	224.373	83.3851	43.0274	697.191
TMG	ZnCl4	[N+]=C(N(C)C)N(C)C.Cl[Zn-2](Cl)(Cl)Cl	0.02	4	190	120	-1	5	3192	78.7048	335.95	1.05867	212.856	61.7669	61.3268	697.31
N1111	ZnCl4	C[N+](C)(C)C.Cl[Zn-2](Cl)(Cl)Cl	0.02	4	170	90	-1	5	2368	68.2912	345.072	1.05132	245.314	52.8094	46.9489	698.198
C8TMG	ZnCl4	CCCCCCCC[N+]=C(N(C)C)N(C)C.Cl[Zn-2](Cl)(Cl)Cl	0.02	4	180	90	-1	5	6559	72.7135	411.954	0.987824	230.394	137.378	44.1821	699.889
C4TMG	ZnCl4	CCCC[N+]=C(N(C)C)N(C)C.Cl[Zn-2](Cl)(Cl)Cl	0.02	4	170	90	-1	5	4814	70.7849	385.543	1.01429	236.672	103.576	45.2949	699.914
N1111	ZnCl4	C[N+](C)(C)C.Cl[Zn-2](Cl)(Cl)Cl	0.04	4	190	90	-1	5	2368	75.0966	361.997	1.03803	223.083	96.0474	42.8664	700.012
DEIM	NiCl4	CC[N]1C=C[N+](=C1)CC.Cl[Ni-2](Cl)(Cl)Cl	0.02	4	190	90	-1	5	4423	70.3865	379.448	1.02094	238.011	95.7022	45.735	700.195
C4TMG	ZnCl3	CCCC[N+]=C(N(C)C)N(C)C.Cl[Zn-](Cl)Cl	0.02	4	170	90	-1	5	4096	69.8802	374.886	1.02742	239.736	89.2688	45.8813	701.151
TMG	ZnCl3	[N+]=C(N(C)C)N(C)C.Cl[Zn-](Cl)Cl	0.04	4	180	90	-1	5	2717	75.6545	373.293	1.02995	221.438	109.39	42.4646	701.62
C8TMG	ZnCl3	CCCCCCCC[N+]=C(N(C)C)N(C)C.Cl[Zn-](Cl)Cl	0.02	4	180	90	-1	5	5644	71.3543	400.272	1.00664	234.783	120.465	45.0237	703.456
Ch	ZnCl4	C[N+](C)(C)CCO.Cl[Zn-2](Cl)(Cl)Cl	0.02	4	180	120	-1	5	2102	76.7772	322.651	1.0847	218.2	41.696	62.7555	703.674
AMIM	NiCl4	C[N+]1=CN(C=C1)CC=C.Cl[Ni-2](Cl)(Cl)Cl	0.02	4	190	90	-1	5	4528	70.0563	383.52	1.02575	239.133	98.4359	45.9505	704.636
C2TMG	ZnCl4	CC[N+]=C(N(C)C)N(C)C.Cl[Zn-2](Cl)(Cl)Cl	0.02	4	190	120	-1	5	3985	78.739	351.142	1.05821	212.763	77.0783	61.3001	704.675
C2TMG	ZnCl3	CC[N+]=C(N(C)C)N(C)C.Cl[Zn-](Cl)Cl	0.04	4	190	90	-1	5	3383	76.753	394.465	1.01563	218.269	134.255	41.9413	705.046
C2TMG	ZnCl3	CC[N+]=C(N(C)C)N(C)C.Cl[Zn-](Cl)Cl	0.02	4	190	120	-1	5	3383	77.7773	343.696	1.07129	215.394	66.2435	62.0581	707.495
C2TMG	ZnCl4	CC[N+]=C(N(C)C)N(C)C.Cl[Zn-2](Cl)(Cl)Cl	0.04	4	190	90	-1	5	3985	77.6669	413.433	1.00368	215.7	156.285	41.4478	708.554
TMG	ZnCl3	[N+]=C(N(C)C)N(C)C.Cl[Zn-](Cl)Cl	0.02	4	180	120	-1	5	2717	76.8974	334.327	1.083	217.859	53.8111	62.6575	708.664
N1111	ZnCl4	C[N+](C)(C)C.Cl[Zn-2](Cl)(Cl)Cl	0.02	4	190	120	-1	5	2368	76.4649	329.379	1.08968	219.091	47.1643	63.1232	709.53
N1111	ZnCl3	C[N+](C)(C)C.Cl[Zn-](Cl)Cl	0.02	4	180	120	-1	5	2044	76.0731	324.477	1.09474	220.219	40.9208	63.3364	709.607
N2222	ZnCl3	CC[N+](CC)(CC)CC.Cl[Zn-](Cl)Cl	0.02	4	190	120	-1	5	4258	78.4345	357.806	1.06232	213.589	82.6785	61.5381	710.062
N2222	ZnCl4	CC[N+](CC)(CC)CC.Cl[Zn-2](Cl)(Cl)Cl	0.02	4	190	120	-1	5	5149	79.1079	371.913	1.05327	211.771	99.1281	61.0142	712.594
TMG	ZnCl4	[N+]=C(N(C)C)N(C)C.Cl[Zn-2](Cl)(Cl)Cl	0.04	4	180	90	-1	5	3192	75.4258	393.607	1.03307	222.109	128.904	42.5933	713.338
Ch	ZnCl3	C[N+](C)(C)CCO.Cl[Zn-](Cl)Cl	0.04	4	170	90	-1	5	1880	72.5017	354.273	1.07429	231.067	78.983	44.2223	714.283
DEIM	MnCl3	CC[N]1C=C[N+](=C1)CC.Cl[Mn-](Cl)Cl	0.02	4	190	90	-1	5	1924	66.3115	345.372	1.08368	252.638	44.1886	48.5455	714.526
TMG	ZnCl4	[N+]=C(N(C)C)N(C)C.Cl[Zn-2](Cl)(Cl)Cl	0.02	4	180	120	-1	5	3192	76.7667	344.32	1.08484	218.23	63.3263	62.7641	714.582
EMIM	MnCl3	CCN1C=C[N+](=C1)C.Cl[Mn-](Cl)Cl	0.02	4	190	90	-1	5	1767	66.0927	342.897	1.08727	253.474	40.7171	48.7062	715.082
EMIM	ZnCl4	CCN1C=C[N+](=C1)C.Cl[Zn-2](Cl)(Cl)Cl	0.02	4	190	120	-1	5	1769	75.193	322.818	1.10811	222.797	35.8298	64.191	715.466
DMIM	ZnCl3	CN1C=C[N+](=C1)C.Cl[Zn-](Cl)Cl	0.02	4	190	120	-1	5	1706	75.0979	321.949	1.10952	223.079	34.5976	64.2723	715.733
Ch	ZnCl3	C[N+](C)(C)CCO.Cl[Zn-](Cl)Cl	0.02	4	160	90	-1	5	1880	66.0422	345.473	1.08664	253.668	43.3541	48.4507	716.057
N2222	ZnCl3	CC[N+](CC)(CC)CC.Cl[Zn-](Cl)Cl	0.04	4	190	90	-1	5	4258	77.4061	425.568	1.00706	216.427	167.554	41.5874	716.312
DMIM	ZnCl4	CN1C=C[N+](=C1)C.Cl[Zn-2](Cl)(Cl)Cl	0.02	4	190	120	-1	5	1877	75.1935	325.003	1.10811	222.796	38.017	64.1906	716.555
C6TMG	ZnCl4	CCCCCC[N+]=C(N(C)C)N(C)C.Cl[Zn-2](Cl)(Cl)Cl	0.02	4	170	90	-1	5	5675	69.9974	408.614	1.0257	239.334	123.475	45.8045	717.155
DMIM	MnCl3	CN1C=C[N+](=C1)C.Cl[Mn-](Cl)Cl	0.02	4	190	90	-1	5	1851	65.9696	345.476	1.0893	253.947	42.7323	48.797	717.386
DMIM	ZnCl3	CN1C=C[N+](=C1)C.Cl[Zn-](Cl)Cl	0.04	4	190	90	-1	5	1706	71.8311	350.382	1.08522	233.225	72.342	44.8151	717.799
C6TMG	ZnCl3	CCCCCC[N+]=C(N(C)C)N(C)C.Cl[Zn-](Cl)Cl	0.02	4	170	90	-1	5	4853	69.0397	396.148	1.03992	242.654	107.055	46.4398	718.036
Ch	ZnCl3	C[N+](C)(C)CCO.Cl[Zn-](Cl)Cl	0.06	4	190	90	-1	5	1880	78.3982	364.313	1.07202	213.688	109.564	41.0611	718.165
Ch	OH	C[N+](C)(C)CCO.[OH-]	0.02	4	190	90	-1	5	2579	66.5583	359.078	1.07966	251.701	59.0123	48.3654	719.369
EMIM	ZnCl3	CCN1C=C[N+](=C1)C.Cl[Zn-](Cl)Cl	0.04	4	190	90	-1	5	1632	71.5052	348.826	1.09016	234.287	69.5195	45.0194	719.495
C4TMG	ZnCl4	CCCC[N+]=C(N(C)C)N(C)C.Cl[Zn-2](Cl)(Cl)Cl	0.02	4	190	120	-1	5	4814	77.9232	371.02	1.06929	214.991	94.0878	61.9419	720.154
DEIM	ZnCl4	CC[N]1C=C[N+](=C1)CC.Cl[Zn-2](Cl)(Cl)Cl	0.02	4	190	120	-1	5	1966	74.8495	328.308	1.1132	223.82	40.0026	64.4856	720.753
N1111	OH	C[N+](C)(C)C.[OH-]	0.02	4	190	90	-1	5	3254	67.0903	371.554	1.0711	249.705	73.8672	47.9819	721.326
C2TMG	ZnCl4	CC[N+]=C(N(C)C)N(C)C.Cl[Zn-2](Cl)(Cl)Cl	0.02	4	180	120	-1	5	3985	76.8689	359.574	1.0834	217.939	78.9535	62.6807	721.488
EMIM	ZnCl3	CCN1C=C[N+](=C1)C.Cl[Zn-](Cl)Cl	0.02	4	190	120	-1	5	1632	74.4048	323.433	1.11985	225.157	33.4051	64.8709	721.642
EMIM	ZnCl4	CCN1C=C[N+](=C1)C.Cl[Zn-2](Cl)(Cl)Cl	0.04	4	190	90	-1	5	1769	71.5615	354.383	1.0893	234.103	75.296	44.984	721.844
C2TMG	ZnCl3	CC[N+]=C(N(C)C)N(C)C.Cl[Zn-](Cl)Cl	0.04	4	180	90	-1	5	3383	74.8621	404.342	1.04085	223.782	137.646	42.914	722.595
DEIM	FeCl4	CC[N]1C=C[N+](=C1)CC.Cl[Fe-](Cl)(Cl)Cl	0.02	4	190	90	-1	5	2233	65.8927	354.708	1.09057	254.243	51.6113	48.8539	722.637
EMIM	FeCl4	CCN1C=C[N+](=C1)C.Cl[Fe-](Cl)(Cl)Cl	0.02	4	190	90	-1	5	2108	65.6973	352.866	1.09381	254.999	48.8671	48.9993	723.338
C2TMG	ZnCl3	CC[N+]=C(N(C)C)N(C)C.Cl[Zn-](Cl)Cl	0.02	4	180	120	-1	5	3383	76.0141	351.556	1.09559	220.39	67.78	63.3855	723.571
N1111	ZnCl4	C[N+](C)(C)C.Cl[Zn-2](Cl)(Cl)Cl	0.04	4	180	90	-1	5	2368	72.5565	374.58	1.07392	230.893	99.4098	44.2777	724.251
Ch	ZnCl4	C[N+](C)(C)CCO.Cl[Zn-2](Cl)(Cl)Cl	0.02	4	160	90	-1	5	2102	65.3951	354.061	1.0974	256.178	48.9533	48.9301	725.728
DEIM	ZnCl4	CC[N]1C=C[N+](=C1)CC.Cl[Zn-2](Cl)(Cl)Cl	0.04	4	190	90	-1	5	1966	71.58	362.675	1.08902	234.043	83.6596	44.9723	725.849
N2222	ZnCl3	CC[N+](CC)(CC)CC.Cl[Zn-](Cl)Cl	0.02	4	180	120	-1	5	4258	76.6568	365.993	1.0864	218.543	84.5959	62.8542	726.197
AMIM	MnCl3	C[N+]1=CN(C=C1)CC=C.Cl[Mn-](Cl)Cl	0.02	4	190	90	-1	5	1989	65.312	352.173	1.10026	256.504	46.3806	49.2884	726.219
AMIM	ZnCl4	C[N+]1=CN(C=C1)CC=C.Cl[Zn-2](Cl)(Cl)Cl	0.02	4	190	120	-1	5	2047	74.345	332.195	1.12075	225.338	41.9334	64.9231	726.473
DEIM	ZnCl3	CC[N]1C=C[N+](=C1)CC.Cl[Zn-](Cl)Cl	0.04	4	190	90	-1	5	1790	71.1001	357.583	1.09637	235.622	76.6844	45.2759	726.978
Ch	ZnCl4	C[N+](C)(C)CCO.Cl[Zn-2](Cl)(Cl)Cl	0.04	4	170	90	-1	5	2102	71.6886	367.723	1.08648	233.688	89.3113	44.7239	727.1
C2TMG	ZnCl4	CC[N+]=C(N(C)C)N(C)C.Cl[Zn-2](Cl)(Cl)Cl	0.04	4	180	90	-1	5	3985	75.6233	424.519	1.03037	221.529	160.508	42.4821	727.445
C4TMG	ZnCl3	CCCC[N+]=C(N(C)C)N(C)C.Cl[Zn-](Cl)Cl	0.02	4	190	120	-1	5	4096	76.3769	364.215	1.09094	219.343	81.6755	63.1959	727.575
N2222	ZnCl4	CC[N+](CC)(CC)CC.Cl[Zn-2](Cl)(Cl)Cl	0.04	4	190	90	-1	5	5149	78.0217	456.995	0.999111	214.72	201.017	41.2593	728.053
N1111	ZnCl3	C[N+](C)(C)C.Cl[Zn-](Cl)Cl	0.02	4	160	90	-1	5	2044	65.1115	354.247	1.10218	257.294	47.8099	49.1432	728.211
Ch	ZnCl3	C[N+](C)(C)CCO.Cl[Zn-](Cl)Cl	0.02	4	170	120	-1	5	1880	73.9202	330.434	1.12605	226.633	38.7337	65.0667	728.243
DMIM	ZnCl4	CN1C=C[N+](=C1)C.Cl[Zn-2](Cl)(Cl)Cl	0.04	4	190	90	-1	5	1877	71.1275	361.17	1.09595	235.532	80.3805	45.2584	728.561
Ch	ZnCl4	C[N+](C)(C)CCO.Cl[Zn-2](Cl)(Cl)Cl	0.06	4	190	90	-1	5	2102	77.9479	379.431	1.07821	214.923	123.209	41.2984	728.821
DMIM	ZnCl3	CN1C=C[N+](=C1)C.Cl[Zn-](Cl)Cl	0.02	4	180	90	-1	5	1706	64.7563	348.439	1.10921	258.705	40.1228	49.6112	728.823
DMIM	FeCl4	CN1C=C[N+](=C1)C.Cl[Fe-](Cl)(Cl)Cl	0.02	4	190	90	-1	5	2198	65.257	357.347	1.10119	256.72	51.2973	49.3299	729.269
N2222	ZnCl4	CC[N+](CC)(CC)CC.Cl[Zn-2](Cl)(Cl)Cl	0.02	4	180	120	-1	5	5149	77.222	380.886	1.07845	216.943	101.549	62.3941	729.668
C6TMG	MnCl3	CCCCCC[N+]=C(N(C)C)N(C)C.Cl[Mn-](Cl)Cl	0.02	4	190	90	-1	5	5048	68.1767	405.709	1.05403	245.726	112.766	47.2173	729.87
DEIM	ZnCl3	CC[N]1C=C[N+](=C1)CC.Cl[Zn-](Cl)Cl	0.02	4	190	120	-1	5	1790	73.6867	329.851	1.13077	227.351	36.9963	65.5032	730.308
Ch	OH	C[N+](C)(C)CCO.[OH-]	0.02	4	180	90	-1	5	2579	65.4683	364.958	1.09714	255.891	59.9949	49.0716	731.05
C4TMG	MnCl3	CCCC[N+]=C(N(C)C)N(C)C.Cl[Mn-](Cl)Cl	0.02	4	190	90	-1	5	4284	67.2701	393.88	1.06824	249.038	96.9888	47.8537	731.059
N1111	ZnCl4	C[N+](C)(C)C.Cl[Zn-2](Cl)(Cl)Cl	0.02	4	180	120	-1	5	2368	74.1104	339.728	1.12373	226.052	48.6627	65.0138	731.728
C4TMG	ZnCl4	CCCC[N+]=C(N(C)C)N(C)C.Cl[Zn-2](Cl)(Cl)Cl	0.04	4	190	90	-1	5	4814	76.8847	450.482	1.01389	217.895	190.717	41.8695	732.184
C4TMG	ZnCl3	CCCC[N+]=C(N(C)C)N(C)C.Cl[Zn-](Cl)Cl	0.04	4	190	90	-1	5	4096	75.3891	430.409	1.034	222.217	165.491	42.7001	732.204
N1111	ZnCl3	C[N+](C)(C)C.Cl[Zn-](Cl)Cl	0.04	4	170	90	-1	5	2044	71.0602	368.489	1.09609	235.755	87.615	45.1194	732.287
C8TMG	MnCl3	CCCCCCCC[N+]=C(N(C)C)N(C)C.Cl[Mn-](Cl)Cl	0.02	4	190	90	-1	5	5846	68.7301	420.125	1.04554	243.747	129.54	46.8371	732.834
AMIM	ZnCl3	C[N+]1=CN(C=C1)CC=C.Cl[Zn-](Cl)Cl	0.02	4	190	120	-1	5	1852	73.419	332.339	1.13489	228.18	38.4173	65.7419	733.613
TMG	ZnCl3	[N+]=C(N(C)C)N(C)C.Cl[Zn-](Cl)Cl	0.02	4	160	90	-1	5	2717	65.317	368.824	1.09871	256.484	63.3516	48.9886	733.765
C8TMG	ZnCl3	CCCCCCCC[N+]=C(N(C)C)N(C)C.Cl[Zn-](Cl)Cl	0.02	4	170	90	-1	5	5644	68.3755	417.616	1.05003	245.011	125.713	46.891	733.821
EMIM	ZnCl3	CCN1C=C[N+](=C1)C.Cl[Zn-](Cl)Cl	0.02	4	180	90	-1	5	1632	64.235	349.512	1.11821	260.804	38.6939	50.0138	733.86
N1111	ZnCl3	C[N+](C)(C)C.Cl[Zn-](Cl)Cl	0.06	4	190	90	-1	5	2044	77.2314	379.519	1.08821	216.917	120.921	41.6815	733.866
AMIM	ZnCl3	C[N+]1=CN(C=C1)CC=C.Cl[Zn-](Cl)Cl	0.04	4	190	90	-1	5	1852	70.528	363.161	1.10527	237.534	79.984	45.6432	734.214
C8TMG	ZnCl4	CCCCCCCC[N+]=C(N(C)C)N(C)C.Cl[Zn-2](Cl)(Cl)Cl	0.02	4	170	90	-1	5	6559	69.2871	432.233	1.03621	241.788	144.171	46.274	734.222
N2222	ZnCl3	CC[N+](CC)(CC)CC.Cl[Zn-](Cl)Cl	0.04	4	180	90	-1	5	4258	75.4816	436.333	1.03231	221.945	171.826	42.5619	734.319
Ch	ZnCl3	C[N+](C)(C)CCO.Cl[Zn-](Cl)Cl	0.04	4	190	120	-1	5	1880	79.4618	343.636	1.12525	210.828	72.0649	60.7426	734.442
Ch	ZnCl3	C[N+](C)(C)CCO.Cl[Zn-](Cl)Cl	0.06	4	180	90	-1	5	1880	76.4879	373.327	1.09837	219.025	112.3	42.0019	735.849
AMIM	ZnCl4	C[N+]1=CN(C=C1)CC=C.Cl[Zn-2](Cl)(Cl)Cl	0.04	4	190	90	-1	5	2047	70.7288	370.528	1.10213	236.859	88.1548	45.5136	736.329
AMIM	FeCl4	C[N+]1=CN(C=C1)CC=C.Cl[Fe-](Cl)(Cl)Cl	0.02	4	190	90	-1	5	2292	64.7161	362.546	1.11039	258.866	53.9382	49.7422	736.47
EMIM	ZnCl4	CCN1C=C[N+](=C1)C.Cl[Zn-2](Cl)(Cl)Cl	0.02	4	180	90	-1	5	1769	64.133	353.321	1.11999	261.219	42.0088	50.0934	736.654
TMG	ZnCl3	[N+]=C(N(C)C)N(C)C.Cl[Zn-](Cl)Cl	0.04	4	170	90	-1	5	2717	72.014	392.074	1.08157	232.632	114.92	44.5218	736.821
C4TMG	ZnCl4	CCCC[N+]=C(N(C)C)N(C)C.Cl[Zn-2](Cl)(Cl)Cl	0.02	4	180	120	-1	5	4814	76.0814	379.89	1.09462	220.195	96.3655	63.3295	737.253
Ch	ZnCl4	C[N+](C)(C)CCO.Cl[Zn-2](Cl)(Cl)Cl	0.02	4	170	120	-1	5	2102	73.2282	338.173	1.13669	228.775	43.7168	65.6815	737.432
C2TMG	MnCl3	CC[N+]=C(N(C)C)N(C)C.Cl[Mn-](Cl)Cl	0.02	4	190	90	-1	5	3564	65.848	385.734	1.09131	254.416	82.4307	48.8871	738.52
DEIM	ZnCl4	CC[N]1C=C[N+](=C1)CC.Cl[Zn-2](Cl)(Cl)Cl	0.02	4	180	90	-1	5	1966	64.1574	357.863	1.11956	261.12	46.6692	50.0743	738.712
C6TMG	ZnCl4	CCCCCC[N+]=C(N(C)C)N(C)C.Cl[Zn-2](Cl)(Cl)Cl	0.02	4	190	120	-1	5	5675	76.7971	393.535	1.08497	218.143	112.542	62.8501	739.251
C8TMG	FeCl4	CCCCCCCC[N+]=C(N(C)C)N(C)C.Cl[Fe-](Cl)(Cl)Cl	0.02	4	190	90	-1	5	5745	67.8659	423.208	1.05886	246.851	128.924	47.4336	741.034
TMG	ZnCl4	[N+]=C(N(C)C)N(C)C.Cl[Zn-2](Cl)(Cl)Cl	0.02	4	160	90	-1	5	3192	65.1334	380.97	1.1018	257.207	74.6368	49.1266	741.387
Ch	ZnCl4	C[N+](C)(C)CCO.Cl[Zn-2](Cl)(Cl)Cl	0.04	4	190	120	-1	5	2102	79.1087	353.717	1.13027	211.769	80.9343	61.0137	741.994
TMG	ZnCl3	[N+]=C(N(C)C)N(C)C.Cl[Zn-](Cl)Cl	0.02	4	170	120	-1	5	2717	73.3925	350.178	1.13415	228.263	56.3809	65.5346	742.163
C6TMG	FeCl4	CCCCCC[N+]=C(N(C)C)N(C)C.Cl[Fe-](Cl)(Cl)Cl	0.02	4	190	90	-1	5	5013	66.9669	412.242	1.07307	250.165	114.007	48.0703	742.657
N1111	ZnCl3	C[N+](C)(C)C.Cl[Zn-](Cl)Cl	0.02	4	170	120	-1	5	2044	72.6486	339.655	1.14576	230.6	42.8497	66.2056	742.708
C4TMG	ZnCl3	CCCC[N+]=C(N(C)C)N(C)C.Cl[Zn-](Cl)Cl	0.02	4	180	120	-1	5	4096	74.7262	372.146	1.11447	224.189	83.4797	64.478	743.307
TMG	OH	[N+]=C(N(C)C)N(C)C.[OH-]	0.02	4	190	90	-1	5	4352	66.1949	401.842	1.08559	253.082	100.129	48.6309	743.715
DEIM	CoCl3	CC[N]1C=C[N+](=C1)CC.Cl[Co-](Cl)Cl	0.02	4	190	90	-1	5	5047	66.8448	413.77	1.07503	250.622	114.99	48.1581	744.401
DEIM	ZnCl3	CC[N]1C=C[N+](=C1)CC.Cl[Zn-](Cl)Cl	0.02	4	180	90	-1	5	1790	63.4681	357.527	1.13172	263.956	42.9528	50.6181	744.624
DMIM	ZnCl4	CN1C=C[N+](=C1)C.Cl[Zn-2](Cl)(Cl)Cl	0.02	4	180	90	-1	5	1877	63.5196	359.323	1.1308	263.742	45.0039	50.5771	745.062
N1111	OH	C[N+](C)(C)C.[OH-]	0.02	4	180	90	-1	5	3254	64.8922	384.04	1.10688	258.163	76.3694	49.5073	745.462
TMG	ZnCl3	[N+]=C(N(C)C)N(C)C.Cl[Zn-](Cl)Cl	0.06	4	190	90	-1	5	2717	77.9157	415.651	1.07866	215.012	159.324	41.3154	747.153
EMIM	CoCl3	CCN1C=C[N+](=C1)C.Cl[Co-](Cl)Cl	0.02	4	190	90	-1	5	5050	66.6	415.36	1.07899	251.543	115.481	48.3352	747.172
N1111	ZnCl3	C[N+](C)(C)C.Cl[Zn-](Cl)Cl	0.04	4	190	120	-1	5	2044	78.4372	354.493	1.13995	213.582	79.3748	61.536	747.22
N2222	ZnCl4	CC[N+](CC)(CC)CC.Cl[Zn-2](Cl)(Cl)Cl	0.04	4	180	90	-1	5	5149	75.9499	469.376	1.02594	220.577	206.5	42.2994	747.658
DMIM	CoCl4	CN1C=C[N+](=C1)C.Cl[Co-2](Cl)(Cl)Cl	0.02	4	190	120	-1	5	4734	74.8738	384.504	1.11284	223.747	96.2924	64.4646	748.67
C6TMG	ZnCl3	CCCCCC[N+]=C(N(C)C)N(C)C.Cl[Zn-](Cl)Cl	0.02	4	190	120	-1	5	4853	74.9635	386.461	1.1115	223.479	98.5949	64.3874	748.983
C4TMG	FeCl4	CCCC[N+]=C(N(C)C)N(C)C.Cl[Fe-](Cl)(Cl)Cl	0.02	4	190	90	-1	5	4321	65.6866	404.233	1.09399	255.041	100.185	49.0073	749.111
C4TMG	ZnCl3	CCCC[N+]=C(N(C)C)N(C)C.Cl[Zn-](Cl)Cl	0.04	4	180	90	-1	5	4096	73.6604	440.422	1.05783	227.432	169.375	43.6141	749.125
TMG	ZnCl4	[N+]=C(N(C)C)N(C)C.Cl[Zn-2](Cl)(Cl)Cl	0.02	4	170	120	-1	5	3192	73.1925	361.019	1.13725	228.887	66.4187	65.7136	749.133
Ch	ZnCl4	C[N+](C)(C)CCO.Cl[Zn-2](Cl)(Cl)Cl	0.06	4	180	90	-1	5	2102	75.8071	390.06	1.10823	220.992	126.689	42.3791	749.147
EMIM	CoCl4	CCN1C=C[N+](=C1)C.Cl[Co-2](Cl)(Cl)Cl	0.02	4	190	120	-1	5	4435	74.4377	380.639	1.11936	225.058	90.7392	64.8423	749.998
TMG	ZnCl4	[N+]=C(N(C)C)N(C)C.Cl[Zn-2](Cl)(Cl)Cl	0.04	4	170	90	-1	5	3192	71.6893	414.032	1.08647	233.686	135.623	44.7235	750.249
EMIM	CoCl4	CCN1C=C[N+](=C1)C.Cl[Co-2](Cl)(Cl)Cl	0.04	4	190	90	-1	5	4435	74.2526	450.903	1.04983	225.619	181.931	43.3536	750.364
Ch	ZnCl3	C[N+](C)(C)CCO.Cl[Zn-](Cl)Cl	0.04	4	180	120	-1	5	1880	77.7352	351.158	1.1497	215.511	73.6655	61.9821	750.427
C2TMG	ZnCl3	CC[N+]=C(N(C)C)N(C)C.Cl[Zn-](Cl)Cl	0.02	4	160	90	-1	5	3383	64.4756	389.369	1.11304	259.831	79.9099	49.6279	751.206
C4TMG	ZnCl4	CCCC[N+]=C(N(C)C)N(C)C.Cl[Zn-2](Cl)(Cl)Cl	0.04	4	180	90	-1	5	4814	74.9047	462.303	1.04026	223.654	195.759	42.8897	751.279
C2TMG	ZnCl4	CC[N+]=C(N(C)C)N(C)C.Cl[Zn-2](Cl)(Cl)Cl	0.02	4	160	90	-1	5	3985	65.0484	400.035	1.10324	257.543	93.3008	49.1908	751.639
TMG	OH	[N+]=C(N(C)C)N(C)C.[OH-]	0.02	4	180	90	-1	5	4352	65.4212	406.495	1.09793	256.075	101.313	49.1069	752.214
DMIM	CoCl3	CN1C=C[N+](=C1)C.Cl[Co-](Cl)Cl	0.02	4	190	90	-1	5	5308	66.4037	422.505	1.08218	252.287	121.74	48.4781	752.34
N2222	ZnCl3	CC[N+](CC)(CC)CC.Cl[Zn-](Cl)Cl	0.02	4	160	90	-1	5	4258	65.1358	405.882	1.10176	257.198	99.5589	49.1249	753.823
C6TMG	CoCl3	CCCCCC[N+]=C(N(C)C)N(C)C.Cl[Co-](Cl)Cl	0.02	4	190	90	-1	5	7501	68.4304	458.799	1.05012	244.815	166.942	47.0423	754.462
N1111	ZnCl3	C[N+](C)(C)C.Cl[Zn-](Cl)Cl	0.06	4	180	90	-1	5	2044	75.0823	390.296	1.11893	223.125	124.382	42.7882	754.614
Ch	HCO3	C[N+](C)(C)CCO.OC([O-])=O	0.02	4	180	90	-1	5	1984	62.7857	366.118	1.14402	266.825	48.1255	51.1683	755.069
TMG	ZnCl3	[N+]=C(N(C)C)N(C)C.Cl[Zn-](Cl)Cl	0.04	4	190	120	-1	5	2717	78.9695	378.062	1.13226	212.142	104.798	61.1212	755.163
DMIM	CoCl4	CN1C=C[N+](=C1)C.Cl[Co-2](Cl)(Cl)Cl	0.04	4	190	90	-1	5	4734	74.3827	462.358	1.04799	225.224	193.857	43.2778	755.174
C8TMG	CoCl3	CCCCCCCC[N+]=C(N(C)C)N(C)C.Cl[Co-](Cl)Cl	0.02	4	190	90	-1	5	8116	68.9716	468.779	1.04188	242.894	179.212	46.6732	755.332
Ch	Lys	C[N+](C)(C)CCO.C(CCN)CC(C(=O)[O-])N	0.02	4	180	90	-1	5	1993	62.7348	366.634	1.14495	267.041	48.383	51.2098	755.792
Ch	Ac	C[N+](C)(C)CCO.CC(=O)[O-]	0.02	4	180	90	-1	5	2054	62.7917	367.781	1.14391	266.799	49.8187	51.1634	755.847
AMIM	ZnCl4	C[N+]1=CN(C=C1)CC=C.Cl[Zn-2](Cl)(Cl)Cl	0.02	4	180	90	-1	5	2047	62.7815	367.671	1.1441	266.842	49.6569	51.1717	755.884
C6TMG	ZnCl4	CCCCCC[N+]=C(N(C)C)N(C)C.Cl[Zn-2](Cl)(Cl)Cl	0.02	4	180	120	-1	5	5675	75.0431	402.621	1.10976	223.242	115.173	64.2057	756.192
TMG	MnCl3	[N+]=C(N(C)C)N(C)C.Cl[Mn-](Cl)Cl	0.02	4	190	90	-1	5	2892	63.6265	383.116	1.12941	263.299	69.2236	50.594	756.263
C2TMG	ZnCl4	CC[N+]=C(N(C)C)N(C)C.Cl[Zn-2](Cl)(Cl)Cl	0.02	4	170	120	-1	5	3985	73.2402	377.274	1.13651	228.737	82.8653	65.6708	756.89
AMIM	CoCl3	C[N+]1=CN(C=C1)CC=C.Cl[Co-](Cl)Cl	0.02	4	190	90	-1	5	5132	65.8183	422.19	1.0918	254.531	118.75	48.9092	756.994
AMIM	ZnCl3	C[N+]1=CN(C=C1)CC=C.Cl[Zn-](Cl)Cl	0.02	4	180	90	-1	5	1852	62.4762	364.714	1.14969	268.146	45.1461	51.4218	757.201
C4TMG	CoCl3	CCCC[N+]=C(N(C)C)N(C)C.Cl[Co-](Cl)Cl	0.02	4	190	90	-1	5	6951	67.5451	452.41	1.06389	248.023	156.728	47.6588	758.149
Ch	But	C[N+](C)(C)CCO.CCCC(=O)[O-]	0.02	4	180	90	-1	5	2235	62.777	372.258	1.14418	266.862	54.2214	51.1754	758.219
N1111	ZnCl4	C[N+](C)(C)C.Cl[Zn-2](Cl)(Cl)Cl	0.02	4	160	90	-1	5	2368	62.8578	374.798	1.14169	266.519	57.3742	50.9052	758.245
C2TMG	ZnCl3	CC[N+]=C(N(C)C)N(C)C.Cl[Zn-](Cl)Cl	0.02	4	170	120	-1	5	3383	72.5033	368.463	1.14806	231.062	71.0622	66.3383	758.26
Ch	For	C[N+](C)(C)CCO.C(=O)[O-]	0.02	4	180	90	-1	5	2256	62.7867	372.71	1.144	266.82	54.7224	51.1675	758.356
N1111	Lys	C[N+](C)(C)C.C(CCN)CC(C(=O)[O-])N	0.02	4	180	90	-1	5	2193	62.7211	371.57	1.1452	267.099	53.2499	51.221	758.384
DEIM	CoCl4	CC[N]1C=C[N+](=C1)CC.Cl[Co-2](Cl)(Cl)Cl	0.04	4	190	90	-1	5	4469	73.5081	456.879	1.06046	227.904	185.182	43.7927	758.668
C2TMG	ZnCl3	CC[N+]=C(N(C)C)N(C)C.Cl[Zn-](Cl)Cl	0.04	4	170	90	-1	5	3383	71.277	424.589	1.09275	235.037	144.569	44.9821	758.67
N1111	HCO3	C[N+](C)(C)C.OC([O-])=O	0.02	4	180	90	-1	5	2307	62.7708	374.042	1.14429	266.888	55.9737	51.1805	759.167
C8TMG	ZnCl4	CCCCCCCC[N+]=C(N(C)C)N(C)C.Cl[Zn-2](Cl)(Cl)Cl	0.02	4	190	120	-1	5	6559	75.6177	417.478	1.10189	221.546	132.102	63.8304	759.683
N2222	ZnCl4	CC[N+](CC)(CC)CC.Cl[Zn-2](Cl)(Cl)Cl	0.02	4	160	90	-1	5	5149	65.517	424.232	1.09535	255.701	119.691	48.8391	759.792
C6TMG	ZnCl4	CCCCCC[N+]=C(N(C)C)N(C)C.Cl[Zn-2](Cl)(Cl)Cl	0.04	4	190	90	-1	5	5675	75.7956	491.555	1.02845	221.026	228.058	42.4711	760.005
N1111	Ac	C[N+](C)(C)C.CC(=O)[O-]	0.02	4	180	90	-1	5	2398	62.7856	376.162	1.14402	266.825	58.1679	51.1684	760.092
Ch	ZnCl4	C[N+](C)(C)CCO.Cl[Zn-2](Cl)(Cl)Cl	0.04	4	180	120	-1	5	2102	77.1702	362.492	1.15811	217.089	82.9673	62.436	760.303
N2222	MnCl3	CC[N+](CC)(CC)CC.Cl[Mn-](Cl)Cl	0.02	4	190	90	-1	5	4478	64.8703	413.006	1.10776	258.25	105.131	49.624	760.38
DEIM	CoCl4	CC[N]1C=C[N+](=C1)CC.Cl[Co-2](Cl)(Cl)Cl	0.02	4	190	120	-1	5	4469	73.4516	386.454	1.13438	228.079	92.6624	65.7128	760.42
N1111	ZnCl4	C[N+](C)(C)C.Cl[Zn-2](Cl)(Cl)Cl	0.06	4	190	90	-1	5	2368	75.5069	407.793	1.11307	221.871	143.288	42.6335	760.43
N2222	ZnCl3	CC[N+](CC)(CC)CC.Cl[Zn-](Cl)Cl	0.02	4	170	120	-1	5	4258	73.136	383.496	1.13812	229.063	88.6683	65.7643	760.81
C6TMG	ZnCl3	CCCCCC[N+]=C(N(C)C)N(C)C.Cl[Zn-](Cl)Cl	0.04	4	190	90	-1	5	4853	74.0228	469.503	1.05308	226.319	199.696	43.4882	761.294
TMG	ZnCl4	[N+]=C(N(C)C)N(C)C.Cl[Zn-2](Cl)(Cl)Cl	0.06	4	190	90	-1	5	3192	77.8878	443.663	1.07904	215.089	187.244	41.3302	761.353
DMIM	NiCl4	CN1C=C[N+](=C1)C.Cl[Ni-2](Cl)(Cl)Cl	0.02	4	190	120	-1	5	4682	73.5733	390.224	1.13251	227.702	96.9182	65.6041	761.366
Ch	MnCl3	C[N+](C)(C)CCO.Cl[Mn-](Cl)Cl	0.02	4	190	90	-1	5	2028	62.2879	370.225	1.15368	268.957	49.5859	51.6814	761.953
N1111	But	C[N+](C)(C)C.CCCC(=O)[O-]	0.02	4	180	90	-1	5	2553	62.7647	380.048	1.1444	266.914	61.9483	51.1854	762.226
Ch	Gly	C[N+](C)(C)CCO.C(C(=O)[O-])N	0.02	4	180	90	-1	5	2584	62.7889	380.653	1.14396	266.811	62.6764	51.1657	762.308
C2TMG	FeCl4	CC[N+]=C(N(C)C)N(C)C.Cl[Fe-](Cl)(Cl)Cl	0.02	4	190	90	-1	5	3681	63.8968	400.302	1.12463	262.185	87.7366	50.38	762.467
C2TMG	OH	CC[N+]=C(N(C)C)N(C)C.[OH-]	0.02	4	190	90	-1	5	5363	65.5558	429.247	1.09617	255.55	124.592	49.105	762.709
C6TMG	ZnCl3	CCCCCC[N+]=C(N(C)C)N(C)C.Cl[Zn-](Cl)Cl	0.02	4	180	120	-1	5	4853	73.5271	393.896	1.13264	227.845	100.521	65.5295	763.27
N1111	For	C[N+](C)(C)C.C(=O)[O-]	0.02	4	180	90	-1	5	2691	62.7803	383.301	1.14412	266.848	65.2807	51.1727	763.71
TMG	ZnCl4	[N+]=C(N(C)C)N(C)C.Cl[Zn-2](Cl)(Cl)Cl	0.04	4	190	120	-1	5	3192	79.0273	396.094	1.13144	211.987	123.03	61.0765	763.765
C2TMG	OH	CC[N+]=C(N(C)C)N(C)C.[OH-]	0.02	4	180	90	-1	5	5363	65.3903	430.234	1.09845	256.197	124.908	49.1302	764.344
N1111	ZnCl4	C[N+](C)(C)C.Cl[Zn-2](Cl)(Cl)Cl	0.04	4	170	90	-1	5	2368	68.719	395.404	1.13343	243.786	104.961	46.6566	764.416
N2222	ZnCl4	CC[N+](CC)(CC)CC.Cl[Zn-2](Cl)(Cl)Cl	0.02	4	170	120	-1	5	5149	73.6111	399.455	1.13078	227.585	106.53	65.3399	765.117
C2TMG	ZnCl4	CC[N+]=C(N(C)C)N(C)C.Cl[Zn-2](Cl)(Cl)Cl	0.04	4	170	90	-1	5	3985	71.8719	446.588	1.08371	233.092	168.886	44.6098	765.147
DMIM	NiCl4	CN1C=C[N+](=C1)C.Cl[Ni-2](Cl)(Cl)Cl	0.04	4	190	90	-1	5	4682	73.2992	467.032	1.06348	228.553	194.561	43.9175	765.257
Ch	ZnCl3	C[N+](C)(C)CCO.Cl[Zn-](Cl)Cl	0.02	4	190	150	-1	5	1880	80.3986	327.343	1.20343	208.372	35.6126	83.3592	765.389
AMIM	CoCl4	C[N+]1=CN(C=C1)CC=C.Cl[Co-2](Cl)(Cl)Cl	0.02	4	190	120	-1	5	4574	73.0699	390.662	1.14031	229.271	95.3349	66.0561	765.486
TMG	ZnCl3	[N+]=C(N(C)C)N(C)C.Cl[Zn-](Cl)Cl	0.06	4	180	90	-1	5	2717	76.0209	425.925	1.10512	220.371	163.295	42.2599	765.521
N1111	ZnCl3	C[N+](C)(C)C.Cl[Zn-](Cl)Cl	0.04	4	180	120	-1	5	2044	76.4755	363.475	1.16863	219.061	81.4109	63.0031	766.054
AMIM	CoCl4	C[N+]1=CN(C=C1)CC=C.Cl[Co-2](Cl)(Cl)Cl	0.04	4	190	90	-1	5	4574	72.9186	464.958	1.06903	229.746	191.065	44.1468	766.995
N1111	Gly	C[N+](C)(C)C.C(C(=O)[O-])N	0.02	4	180	90	-1	5	3001	62.7751	390.853	1.14421	266.87	72.8069	51.1769	767.533
EMIM	NiCl4	CCN1C=C[N+](=C1)C.Cl[Ni-2](Cl)(Cl)Cl	0.04	4	190	90	-1	5	4386	72.4894	459.812	1.07536	231.107	184.297	44.4082	767.587
TMG	Lys	[N+]=C(N(C)C)N(C)C.C(CCN)CC(C(=O)[O-])N	0.02	4	180	90	-1	5	2912	62.6516	389.46	1.14647	267.396	70.7869	51.2778	767.965
Ch	HCO3	C[N+](C)(C)CCO.OC([O-])=O	0.02	4	170	90	-1	5	1984	61.6877	372.53	1.16386	271.574	48.982	51.9746	768.197
Ch	Ac	C[N+](C)(C)CCO.CC(=O)[O-]	0.02	4	170	90	-1	5	2054	61.7171	374.081	1.16331	271.445	50.6861	51.9499	768.696
Ch	Lys	C[N+](C)(C)CCO.C(CCN)CC(C(=O)[O-])N	0.02	4	170	90	-1	5	1993	61.6533	372.961	1.16451	271.725	49.2317	52.0036	768.737
C2TMG	CoCl3	CC[N+]=C(N(C)C)N(C)C.Cl[Co-](Cl)Cl	0.02	4	190	90	-1	5	6482	66.1408	451.217	1.08648	253.29	149.257	48.6708	768.847
N1111	ZnCl4	C[N+](C)(C)C.Cl[Zn-2](Cl)(Cl)Cl	0.04	4	190	120	-1	5	2368	76.8475	374.668	1.16353	218	93.859	62.8089	769.098
N1111	ZnCl4	C[N+](C)(C)C.Cl[Zn-2](Cl)(Cl)Cl	0.02	4	170	120	-1	5	2368	70.4465	357.277	1.18158	237.808	51.1937	68.2751	769.426
EMIM	NiCl4	CCN1C=C[N+](=C1)C.Cl[Ni-2](Cl)(Cl)Cl	0.02	4	190	120	-1	5	4386	72.4945	389.813	1.14936	231.09	92.142	66.5804	769.587
Ch	Ser	C[N+](C)(C)CCO.C(C(C(=O)[O-])N)O	0.02	4	180	90	-1	5	3200	62.7907	395.583	1.14393	266.804	77.6156	51.1642	769.757
C8TMG	ZnCl3	CCCCCCCC[N+]=C(N(C)C)N(C)C.Cl[Zn-](Cl)Cl	0.02	4	190	120	-1	5	5644	73.7009	409.428	1.13055	227.308	116.63	65.4905	769.988
Ch	ZnCl4	C[N+](C)(C)CCO.Cl[Zn-2](Cl)(Cl)Cl	0.02	4	190	150	-1	5	2102	80.136	332.635	1.20738	209.054	39.9484	83.6323	770.006
C4TMG	ZnCl4	CCCC[N+]=C(N(C)C)N(C)C.Cl[Zn-2](Cl)(Cl)Cl	0.02	4	160	90	-1	5	4814	64.2904	424.39	1.11625	260.58	114.039	49.7708	770.32
N2222	ZnCl3	CC[N+](CC)(CC)CC.Cl[Zn-](Cl)Cl	0.04	4	170	90	-1	5	4258	71.8609	458.228	1.08387	233.128	180.483	44.6167	771.049
C4TMG	ZnCl3	CCCC[N+]=C(N(C)C)N(C)C.Cl[Zn-](Cl)Cl	0.02	4	160	90	-1	5	4096	63.5185	412.332	1.12982	263.747	98.2096	50.3757	771.074
Ch	But	C[N+](C)(C)CCO.CCCC(=O)[O-]	0.02	4	170	90	-1	5	2235	61.6945	378.686	1.16374	271.544	55.1728	51.9689	771.211
Ch	For	C[N+](C)(C)CCO.C(=O)[O-]	0.02	4	170	90	-1	5	2256	61.7126	379.093	1.16339	271.464	55.6749	51.9536	771.244
EMIM	ZnCl4	CCN1C=C[N+](=C1)C.Cl[Zn-2](Cl)(Cl)Cl	0.04	4	190	120	-1	5	1769	75.4478	357.436	1.18511	222.045	71.4176	63.9742	771.275
DMIM	ZnCl3	CN1C=C[N+](=C1)C.Cl[Zn-](Cl)Cl	0.04	4	190	120	-1	5	1706	75.3223	355.484	1.18709	222.415	68.9889	64.0808	771.286
N1111	Lys	C[N+](C)(C)C.C(CCN)CC(C(=O)[O-])N	0.02	4	170	90	-1	5	2193	61.6372	378	1.16482	271.796	54.1863	52.0172	771.408
Ch	ZnCl3	C[N+](C)(C)CCO.Cl[Zn-](Cl)Cl	0.06	4	170	90	-1	5	1880	72.932	391.441	1.15148	229.704	117.775	43.9614	771.461
TMG	ZnCl3	[N+]=C(N(C)C)N(C)C.Cl[Zn-](Cl)Cl	0.04	4	180	120	-1	5	2717	77.2488	386.373	1.15694	216.868	107.133	62.3724	771.654
Ch	ZnCl3	C[N+](C)(C)CCO.Cl[Zn-](Cl)Cl	0.08	4	190	90	-1	5	1880	78.6984	399.305	1.14534	212.873	145.528	40.9045	772.321
N1111	HCO3	C[N+](C)(C)C.OC([O-])=O	0.02	4	170	90	-1	5	2307	61.6685	380.623	1.16423	271.658	56.9742	51.9908	772.425
Ch	Ala	C[N+](C)(C)CCO.CC(C(=O)[O-])N	0.02	4	180	90	-1	5	3412	62.7782	400.805	1.14416	266.856	82.774	51.1744	772.481
N1111	Ac	C[N+](C)(C)C.CC(=O)[O-]	0.02	4	170	90	-1	5	2398	61.7071	382.631	1.1635	271.488	59.1845	51.9582	773.064
DMIM	ZnCl4	CN1C=C[N+](=C1)C.Cl[Zn-2](Cl)(Cl)Cl	0.04	4	190	120	-1	5	1877	75.4778	361.653	1.18464	221.956	75.7476	63.9488	773.148
TMG	HCO3	[N+]=C(N(C)C)N(C)C.OC([O-])=O	0.02	4	180	90	-1	5	3346	62.6486	400.03	1.14652	267.409	81.3408	51.2803	773.277
TMG	But	[N+]=C(N(C)C)N(C)C.CCCC(=O)[O-]	0.02	4	180	90	-1	5	3408	62.6678	401.414	1.14617	267.327	82.8227	51.2646	773.793
C4TMG	ZnCl4	CCCC[N+]=C(N(C)C)N(C)C.Cl[Zn-2](Cl)(Cl)Cl	0.02	4	170	120	-1	5	4814	72.4531	398.798	1.14885	231.222	101.191	66.3842	773.825
TMG	Ac	[N+]=C(N(C)C)N(C)C.CC(=O)[O-]	0.02	4	180	90	-1	5	3427	62.6623	401.911	1.14627	267.35	83.2917	51.2691	774.092
N1111	But	C[N+](C)(C)C.CCCC(=O)[O-]	0.02	4	170	90	-1	5	2553	61.6937	386.541	1.16375	271.547	63.0237	51.9695	775.146
EMIM	MnCl3	CCN1C=C[N+](=C1)C.Cl[Mn-](Cl)Cl	0.04	4	190	90	-1	5	1767	66.6342	380.497	1.16985	251.414	80.7725	48.3103	775.175
N1111	Ser	C[N+](C)(C)C.C(C(C(=O)[O-])N)O	0.02	4	180	90	-1	5	3650	62.7841	406.541	1.14405	266.832	88.5396	51.1696	775.296
Ch	Gly	C[N+](C)(C)CCO.C(C(=O)[O-])N	0.02	4	170	90	-1	5	2584	61.7084	387.214	1.16347	271.483	63.7738	51.9572	775.344
N1111	ZnCl3	C[N+](C)(C)C.Cl[Zn-](Cl)Cl	0.02	4	190	150	-1	5	2044	79.5003	334.184	1.21703	210.726	39.1567	84.3011	775.608
C8TMG	ZnCl4	CCCCCCCC[N+]=C(N(C)C)N(C)C.Cl[Zn-2](Cl)(Cl)Cl	0.02	4	180	120	-1	5	6559	74.0239	426.351	1.12504	226.316	134.946	65.0897	775.697
C2TMG	ZnCl3	CC[N+]=C(N(C)C)N(C)C.Cl[Zn-](Cl)Cl	0.06	4	190	90	-1	5	3383	77.0012	460.105	1.09147	217.565	200.734	41.8061	775.786
DMIM	ZnCl3	CN1C=C[N+](=C1)C.Cl[Zn-](Cl)Cl	0.06	4	190	90	-1	5	1706	72.0578	385.337	1.16635	232.491	108.172	44.6742	775.841
C2TMG	Lys	CC[N+]=C(N(C)C)N(C)C.C(CCN)CC(C(=O)[O-])N	0.02	4	180	90	-1	5	3619	62.687	406.417	1.14582	267.245	87.9235	51.2488	776.119
DEIM	MnCl3	CC[N]1C=C[N+](=C1)CC.Cl[Mn-](Cl)Cl	0.04	4	190	90	-1	5	1924	66.8396	386.482	1.16626	250.641	87.6789	48.1619	776.371
C8TMG	MnCl3	CCCCCCCC[N+]=C(N(C)C)N(C)C.Cl[Mn-](Cl)Cl	0.02	4	180	90	-1	5	5846	64.8462	445.188	1.10767	258.346	137.299	49.5424	776.428
C6TMG	ZnCl3	CCCCCC[N+]=C(N(C)C)N(C)C.Cl[Zn-](Cl)Cl	0.04	4	180	90	-1	5	4853	72.5292	479.082	1.07433	230.98	203.808	44.2944	776.705
N1111	For	C[N+](C)(C)C.C(=O)[O-]	0.02	4	170	90	-1	5	2691	61.6959	389.934	1.16371	271.538	66.4281	51.9677	776.822
EMIM	ZnCl3	CCN1C=C[N+](=C1)C.Cl[Zn-](Cl)Cl	0.04	4	190	120	-1	5	1632	74.6221	355.799	1.19823	224.501	66.6157	64.682	777.013
EMIM	ZnCl3	CCN1C=C[N+](=C1)C.Cl[Zn-](Cl)Cl	0.06	4	190	90	-1	5	1632	71.7154	382.462	1.17191	233.601	103.974	44.8874	777.187
C2TMG	ZnCl3	CC[N+]=C(N(C)C)N(C)C.Cl[Zn-](Cl)Cl	0.04	4	190	120	-1	5	3383	78.0035	408.75	1.14628	214.769	132.103	61.8781	777.518
Ch	ZnCl3	C[N+](C)(C)CCO.Cl[Zn-](Cl)Cl	0.04	4	160	90	-1	5	1880	66.5695	385.747	1.16955	251.658	86.0214	48.0669	777.647
C4TMG	ZnCl3	CCCC[N+]=C(N(C)C)N(C)C.Cl[Zn-](Cl)Cl	0.02	4	170	120	-1	5	4096	71.3583	389.592	1.16648	234.77	87.4198	67.4027	778.036
C4TMG	OH	CCCC[N+]=C(N(C)C)N(C)C.[OH-]	0.02	4	180	90	-1	5	6368	65.2204	454.823	1.10131	256.864	148.701	49.2582	778.069
TMG	For	[N+]=C(N(C)C)N(C)C.C(=O)[O-]	0.02	4	180	90	-1	5	3737	62.6384	409.602	1.14671	267.452	90.8609	51.2887	778.157
TMG	ZnCl3	[N+]=C(N(C)C)N(C)C.Cl[Zn-](Cl)Cl	0.02	4	190	150	-1	5	2717	79.8949	345.362	1.21102	209.685	51.7922	83.8847	778.191
DMIM	MnCl3	CN1C=C[N+](=C1)C.Cl[Mn-](Cl)Cl	0.04	4	190	90	-1	5	1851	66.5315	384.93	1.17166	251.802	84.7429	48.3849	778.295
C6TMG	ZnCl4	CCCCCC[N+]=C(N(C)C)N(C)C.Cl[Zn-2](Cl)(Cl)Cl	0.04	4	180	90	-1	5	5675	73.9457	503.765	1.05375	226.555	233.764	43.4459	778.756
TMG	Gly	[N+]=C(N(C)C)N(C)C.C(C(=O)[O-])N	0.02	4	180	90	-1	5	3820	62.6686	411.421	1.14616	267.323	92.8341	51.2639	778.79
DEIM	ZnCl4	CC[N]1C=C[N+](=C1)CC.Cl[Zn-2](Cl)(Cl)Cl	0.04	4	190	120	-1	5	1966	75.0823	367.168	1.19088	223.125	79.7572	64.2856	779.025
N1111	Ala	C[N+](C)(C)C.CC(C(=O)[O-])N	0.02	4	180	90	-1	5	3946	62.7711	413.806	1.14429	266.887	95.7395	51.1802	779.046
C6TMG	MnCl3	CCCCCC[N+]=C(N(C)C)N(C)C.Cl[Mn-](Cl)Cl	0.02	4	180	90	-1	5	5048	63.8411	433.16	1.12511	262.414	120.424	50.3224	779.134
C2TMG	ZnCl4	CC[N+]=C(N(C)C)N(C)C.Cl[Zn-2](Cl)(Cl)Cl	0.04	4	190	120	-1	5	3985	79.0157	426.721	1.1316	212.018	153.617	61.0855	779.161
DMIM	ZnCl4	CN1C=C[N+](=C1)C.Cl[Zn-2](Cl)(Cl)Cl	0.02	4	190	150	-1	5	1877	78.9275	333.387	1.22586	212.255	36.2185	84.9129	779.626
Ch	ZnCl3	C[N+](C)(C)CCO.Cl[Zn-](Cl)Cl	0.02	4	180	150	-1	5	1880	78.8182	333.774	1.2269	212.549	36.3266	84.8976	780.338
EMIM	ZnCl4	CCN1C=C[N+](=C1)C.Cl[Zn-2](Cl)(Cl)Cl	0.06	4	190	90	-1	5	1769	71.8247	390.595	1.17013	233.245	112.53	44.8191	780.362
N1111	Gly	C[N+](C)(C)C.C(C(=O)[O-])N	0.02	4	170	90	-1	5	3001	61.7022	397.546	1.16359	271.51	74.073	51.9624	780.569
C4TMG	OH	CCCC[N+]=C(N(C)C)N(C)C.[OH-]	0.02	4	190	90	-1	5	6368	65.0031	456.443	1.10549	257.723	149.198	49.5226	780.968
Ch	HCO3	C[N+](C)(C)CCO.OC([O-])=O	0.02	4	190	90	-1	5	1984	60.7097	378.745	1.18367	275.949	49.7711	53.0248	781.208
TMG	ZnCl4	[N+]=C(N(C)C)N(C)C.Cl[Zn-2](Cl)(Cl)Cl	0.02	4	190	150	-1	5	3192	80.0235	353.847	1.20907	209.348	60.749	83.7499	781.461
TMG	Lys	[N+]=C(N(C)C)N(C)C.C(CCN)CC(C(=O)[O-])N	0.02	4	170	90	-1	5	2912	61.5352	396.422	1.16675	272.247	72.0712	52.1034	781.585
TMG	ZnCl4	[N+]=C(N(C)C)N(C)C.Cl[Zn-2](Cl)(Cl)Cl	0.06	4	180	90	-1	5	3192	75.828	455.63	1.10793	220.931	192.331	42.3674	781.779
TMG	ZnCl4	[N+]=C(N(C)C)N(C)C.Cl[Zn-2](Cl)(Cl)Cl	0.04	4	180	120	-1	5	3192	77.1528	405.606	1.15838	217.138	126.019	62.45	781.991
N2222	OH	CC[N+](CC)(CC)CC.[OH-]	0.02	4	190	90	-1	5	7333	65.8556	472.851	1.09118	254.386	169.583	48.8815	782.016
Ch	Ac	C[N+](C)(C)CCO.CC(=O)[O-]	0.02	4	190	90	-1	5	2054	60.7022	380.548	1.18382	275.983	51.5336	53.0314	782.184
C8TMG	ZnCl3	CCCCCCCC[N+]=C(N(C)C)N(C)C.Cl[Zn-](Cl)Cl	0.02	4	180	120	-1	5	5644	72.5095	416.038	1.14854	231.043	118.546	66.4492	782.288
Ch	Lys	C[N+](C)(C)CCO.C(CCN)CC(C(=O)[O-])N	0.02	4	190	90	-1	5	1993	60.6306	379.465	1.18522	276.309	50.0622	53.094	782.341
EMIM	ZnCl4	CCN1C=C[N+](=C1)C.Cl[Zn-2](Cl)(Cl)Cl	0.02	4	190	150	-1	5	1769	78.5014	333.101	1.23252	213.407	34.3198	85.3738	782.81
Ch	Ser	C[N+](C)(C)CCO.C(C(C(=O)[O-])N)O	0.02	4	170	90	-1	5	3200	61.7174	402.358	1.1633	271.443	78.9653	51.9496	782.831
C2TMG	But	CC[N+]=C(N(C)C)N(C)C.CCCC(=O)[O-]	0.02	4	180	90	-1	5	4231	62.7119	421.119	1.14537	267.139	102.751	51.2285	783.243
TMG	Ser	[N+]=C(N(C)C)N(C)C.C(C(C(=O)[O-])N)O	0.02	4	180	90	-1	5	4237	62.6917	421.4	1.14574	267.225	102.93	51.245	783.568
DEIM	NiCl4	CC[N]1C=C[N+](=C1)CC.Cl[Ni-2](Cl)(Cl)Cl	0.04	4	190	90	-1	5	4423	71.0667	470.602	1.09689	235.733	189.572	45.2972	783.746
C2TMG	ZnCl4	CC[N+]=C(N(C)C)N(C)C.Cl[Zn-2](Cl)(Cl)Cl	0.06	4	190	90	-1	5	3985	77.9549	489.759	1.07811	214.903	233.561	41.2947	783.936
C2TMG	HCO3	CC[N+]=C(N(C)C)N(C)C.OC([O-])=O	0.02	4	180	90	-1	5	4282	62.6962	422.463	1.14565	267.205	104.016	51.2413	784.058
Ch	ZnCl3	C[N+](C)(C)CCO.Cl[Zn-](Cl)Cl	0.04	4	170	120	-1	5	1880	74.3539	367.014	1.20142	225.311	77.0155	64.6872	784.215
Ch	OH	C[N+](C)(C)CCO.[OH-]	0.02	4	170	90	-1	5	2579	60.969	391.785	1.17758	274.775	64.4223	52.5872	784.684
Ch	For	C[N+](C)(C)CCO.C(=O)[O-]	0.02	4	190	90	-1	5	2256	60.6976	385.645	1.18391	276.004	56.6059	53.0354	784.777
C2TMG	Ac	CC[N+]=C(N(C)C)N(C)C.CC(=O)[O-]	0.02	4	180	90	-1	5	4361	62.7122	424.273	1.14536	267.137	105.908	51.2283	784.817
Ch	But	C[N+](C)(C)CCO.CCCC(=O)[O-]	0.02	4	190	90	-1	5	2235	60.6714	385.284	1.18442	276.123	56.1032	53.0583	784.852
C4TMG	ZnCl3	CCCC[N+]=C(N(C)C)N(C)C.Cl[Zn-](Cl)Cl	0.04	4	170	90	-1	5	4096	70.273	461.56	1.10836	238.395	177.54	45.6248	784.961
N1111	Lys	C[N+](C)(C)C.C(CCN)CC(C(=O)[O-])N	0.02	4	190	90	-1	5	2193	60.6217	384.545	1.18539	276.349	55.094	53.1018	784.968
Ch	ZnCl4	C[N+](C)(C)CCO.Cl[Zn-2](Cl)(Cl)Cl	0.08	4	190	90	-1	5	2102	78.291	418.657	1.1513	213.981	163.559	41.1174	784.976
C4TMG	Lys	CCCC[N+]=C(N(C)C)N(C)C.C(CCN)CC(C(=O)[O-])N	0.02	4	180	90	-1	5	4371	62.698	424.613	1.14562	267.198	106.175	51.2399	785.117
N1111	HCO3	C[N+](C)(C)C.OC([O-])=O	0.02	4	190	90	-1	5	2307	60.7095	386.849	1.18368	275.95	57.8742	53.025	785.263
AMIM	ZnCl4	C[N+]1=CN(C=C1)CC=C.Cl[Zn-2](Cl)(Cl)Cl	0.04	4	190	120	-1	5	2047	74.6119	372.79	1.19839	224.532	83.5668	64.6909	785.59
Ch	Ala	C[N+](C)(C)CCO.CC(C(=O)[O-])N	0.02	4	170	90	-1	5	3412	61.7022	407.69	1.16359	271.51	84.2175	51.9624	785.64
N2222	FeCl4	CC[N+](CC)(CC)CC.Cl[Fe-](Cl)(Cl)Cl	0.02	4	190	90	-1	5	4499	62.7808	427.261	1.14462	266.846	109.14	51.2756	785.943
N2222	ZnCl4	CC[N+](CC)(CC)CC.Cl[Zn-2](Cl)(Cl)Cl	0.04	4	170	90	-1	5	5149	72.1977	493.681	1.07882	232.04	217.232	44.4086	786.249
N1111	ZnCl4	C[N+](C)(C)C.Cl[Zn-2](Cl)(Cl)Cl	0.06	4	180	90	-1	5	2368	72.9803	421.822	1.15116	229.552	148.249	44.0206	786.491
N2222	OH	CC[N+](CC)(CC)CC.[OH-]	0.02	4	180	90	-1	5	7333	65.4549	475.647	1.09737	255.944	170.621	49.0817	786.508
N1111	Ac	C[N+](C)(C)C.CC(=O)[O-]	0.02	4	190	90	-1	5	2398	60.6965	389.215	1.18393	276.009	60.1699	53.0363	786.572
DMIM	ZnCl3	CN1C=C[N+](=C1)C.Cl[Zn-](Cl)Cl	0.02	4	190	150	-1	5	1706	78.0541	333.781	1.23958	214.63	33.2872	85.863	786.681
DEIM	ZnCl4	CC[N]1C=C[N+](=C1)CC.Cl[Zn-2](Cl)(Cl)Cl	0.06	4	190	90	-1	5	1966	71.8171	403.169	1.17025	233.27	125.075	44.8239	786.711
DEIM	ZnCl3	CC[N]1C=C[N+](=C1)CC.Cl[Zn-](Cl)Cl	0.06	4	190	90	-1	5	1790	71.2945	394.845	1.17883	234.98	114.713	45.1524	786.839
TMG	FeCl4	[N+]=C(N(C)C)N(C)C.Cl[Fe-](Cl)(Cl)Cl	0.02	4	190	90	-1	5	3098	61.352	402.433	1.17128	273.06	76.9036	52.4697	786.857
DMIM	ZnCl3	CN1C=C[N+](=C1)C.Cl[Zn-](Cl)Cl	0.02	4	180	120	-1	5	1706	68.2638	354.056	1.21997	245.412	38.0612	70.582	787.014
Ch	ZnCl4	C[N+](C)(C)CCO.Cl[Zn-2](Cl)(Cl)Cl	0.06	4	170	90	-1	5	2102	72.1239	409.89	1.16438	232.278	133.158	44.454	787.137
Ch	ZnCl4	C[N+](C)(C)CCO.Cl[Zn-2](Cl)(Cl)Cl	0.02	4	180	150	-1	5	2102	78.3513	340.078	1.23421	213.816	40.8583	85.4036	787.146
EMIM	FeCl4	CCN1C=C[N+](=C1)C.Cl[Fe-](Cl)(Cl)Cl	0.04	4	190	90	-1	5	2108	66.2726	398.245	1.17624	252.786	96.8859	48.5739	787.241
C4TMG	MnCl3	CCCC[N+]=C(N(C)C)N(C)C.Cl[Mn-](Cl)Cl	0.02	4	180	90	-1	5	4284	62.4417	424.234	1.15032	268.295	104.489	51.4502	787.279
TMG	Ala	[N+]=C(N(C)C)N(C)C.CC(C(=O)[O-])N	0.02	4	180	90	-1	5	4521	62.6705	428.444	1.14612	267.315	109.867	51.2624	787.284
N2222	Lys	CC[N+](CC)(CC)CC.C(CCN)CC(C(=O)[O-])N	0.02	4	180	90	-1	5	4590	62.7257	429.743	1.14512	267.08	111.445	51.2173	787.429
C8TMG	CrCl4	CCCCCCCC[N+]=C(N(C)C)N(C)C.Cl[Cr-](Cl)(Cl)Cl	0.02	4	190	90	-1	5	9460	67.4475	509.719	1.06543	248.382	213.609	47.7278	787.573
DEIM	NiCl4	CC[N]1C=C[N+](=C1)CC.Cl[Ni-2](Cl)(Cl)Cl	0.02	4	190	120	-1	5	4423	70.87	399.543	1.17571	236.387	95.0493	68.1066	787.625
TMG	HCO3	[N+]=C(N(C)C)N(C)C.OC([O-])=O	0.02	4	170	90	-1	5	3346	61.4808	407.523	1.16778	272.488	82.8858	52.1495	787.652
TMG	But	[N+]=C(N(C)C)N(C)C.CCCC(=O)[O-]	0.02	4	170	90	-1	5	3408	61.5282	408.744	1.16688	272.278	84.3566	52.1093	787.812
N2222	ZnCl3	CC[N+](CC)(CC)CC.Cl[Zn-](Cl)Cl	0.04	4	190	120	-1	5	4258	78.6743	439.142	1.13651	212.938	164.853	61.3505	787.827
DEIM	ZnCl3	CC[N]1C=C[N+](=C1)CC.Cl[Zn-](Cl)Cl	0.04	4	190	120	-1	5	1790	73.8986	365.795	1.20996	226.699	73.7804	65.3153	787.877
Ch	ZnCl3	C[N+](C)(C)CCO.Cl[Zn-](Cl)Cl	0.06	4	190	120	-1	5	1880	79.7467	378.311	1.19762	210.075	107.711	60.5255	787.965
DEIM	FeCl4	CC[N]1C=C[N+](=C1)CC.Cl[Fe-](Cl)(Cl)Cl	0.04	4	190	90	-1	5	2233	66.4465	402.933	1.17316	252.124	102.362	48.4468	788.046
C2TMG	Gly	CC[N+]=C(N(C)C)N(C)C.C(C(=O)[O-])N	0.02	4	180	90	-1	5	4637	62.7176	430.939	1.14526	267.114	112.601	51.2238	788.101
DMIM	ZnCl4	CN1C=C[N+](=C1)C.Cl[Zn-2](Cl)(Cl)Cl	0.06	4	190	90	-1	5	1877	71.422	399.706	1.17673	234.56	120.074	45.0718	788.217
TMG	Ac	[N+]=C(N(C)C)N(C)C.CC(=O)[O-]	0.02	4	170	90	-1	5	3427	61.5086	409.344	1.16725	272.365	84.854	52.1259	788.298
N1111	Ser	C[N+](C)(C)C.C(C(C(=O)[O-])N)O	0.02	4	170	90	-1	5	3650	61.7147	413.481	1.16335	271.455	90.0738	51.9519	788.418
N1111	But	C[N+](C)(C)C.CCCC(=O)[O-]	0.02	4	190	90	-1	5	2553	60.6731	393.256	1.18439	276.115	64.0838	53.0568	788.821
Ch	Gly	C[N+](C)(C)CCO.C(C(=O)[O-])N	0.02	4	190	90	-1	5	2584	60.6903	393.923	1.18405	276.037	64.8436	53.0418	788.987
C2TMG	For	CC[N+]=C(N(C)C)N(C)C.C(=O)[O-]	0.02	4	180	90	-1	5	4693	62.6995	432.424	1.14559	267.191	113.994	51.2386	789.008
C6TMG	CrCl4	CCCCCC[N+]=C(N(C)C)N(C)C.Cl[Cr-](Cl)(Cl)Cl	0.02	4	190	90	-1	5	8986	66.8659	503.357	1.07469	250.543	204.671	48.143	789.026
EMIM	ZnCl4	CCN1C=C[N+](=C1)C.Cl[Zn-2](Cl)(Cl)Cl	0.02	4	180	120	-1	5	1769	68.1338	356.139	1.2223	245.88	39.5421	70.7167	789.22
AMIM	MnCl3	C[N+]1=CN(C=C1)CC=C.Cl[Mn-](Cl)Cl	0.04	4	190	90	-1	5	1989	65.8716	395.168	1.1834	254.325	91.9731	48.8697	789.283
AMIM	NiCl4	C[N+]1=CN(C=C1)CC=C.Cl[Ni-2](Cl)(Cl)Cl	0.04	4	190	90	-1	5	4528	70.7533	477.208	1.10175	236.777	194.932	45.4978	789.478
C6TMG	ZnCl3	CCCCCC[N+]=C(N(C)C)N(C)C.Cl[Zn-](Cl)Cl	0.02	4	160	90	-1	5	4853	62.7627	435.666	1.14342	266.923	117.761	50.9823	789.544
C8TMG	ZnCl4	CCCCCCCC[N+]=C(N(C)C)N(C)C.Cl[Zn-2](Cl)(Cl)Cl	0.04	4	190	90	-1	5	6559	74.6534	535.144	1.04419	224.407	267.616	43.1209	789.667
N1111	ZnCl3	C[N+](C)(C)C.Cl[Zn-](Cl)Cl	0.08	4	190	90	-1	5	2044	77.5974	417.846	1.16159	215.894	160.468	41.4849	789.717
C2TMG	Lys	CC[N+]=C(N(C)C)N(C)C.C(CCN)CC(C(=O)[O-])N	0.02	4	170	90	-1	5	3619	61.5828	413.6	1.16585	272.037	89.5001	52.0632	789.723
C2TMG	ZnCl4	CC[N+]=C(N(C)C)N(C)C.Cl[Zn-2](Cl)(Cl)Cl	0.02	4	190	150	-1	5	3985	79.9433	369.31	1.21029	209.558	75.9173	83.834	789.799
C4TMG	ZnCl4	CCCC[N+]=C(N(C)C)N(C)C.Cl[Zn-2](Cl)(Cl)Cl	0.04	4	170	90	-1	5	4814	71.209	486.206	1.09379	235.262	205.919	45.0251	790
C6TMG	ZnCl4	CCCCCC[N+]=C(N(C)C)N(C)C.Cl[Zn-2](Cl)(Cl)Cl	0.02	4	160	90	-1	5	5675	63.5157	450.211	1.12987	263.758	136.075	50.3779	790.038
AMIM	NiCl4	C[N+]1=CN(C=C1)CC=C.Cl[Ni-2](Cl)(Cl)Cl	0.02	4	190	120	-1	5	4528	70.7476	402.495	1.17774	236.796	97.474	68.2244	790.118
N1111	For	C[N+](C)(C)C.C(=O)[O-]	0.02	4	190	90	-1	5	2691	60.6976	396.56	1.18391	276.004	67.5206	53.0354	790.234
DMIM	ZnCl3	CN1C=C[N+](=C1)C.Cl[Zn-](Cl)Cl	0.04	4	180	90	-1	5	1706	65.2078	385.871	1.19495	256.914	79.69	49.2677	790.411
C8TMG	ZnCl3	CCCCCCCC[N+]=C(N(C)C)N(C)C.Cl[Zn-](Cl)Cl	0.04	4	190	90	-1	5	5644	72.7982	510.497	1.0708	230.126	236.151	44.2198	790.648
Ch	ZnCl4	C[N+](C)(C)CCO.Cl[Zn-2](Cl)(Cl)Cl	0.04	4	160	90	-1	5	2102	65.9008	399.922	1.18141	254.212	97.1553	48.5546	790.669
Ch	ZnCl3	C[N+](C)(C)CCO.Cl[Zn-](Cl)Cl	0.08	4	180	90	-1	5	1880	76.8457	408.848	1.17253	218.005	149.036	41.8063	790.689
DMIM	FeCl4	CN1C=C[N+](=C1)C.Cl[Fe-](Cl)(Cl)Cl	0.02	4	190	120	-1	5	2198	68.4452	364.189	1.21736	244.762	48.9079	70.5193	790.774
DMIM	ZnCl4	CN1C=C[N+](=C1)C.Cl[Zn-2](Cl)(Cl)Cl	0.02	4	180	120	-1	5	1877	68.1008	358.727	1.22289	246	41.9765	70.751	790.81
TMG	CoCl3	[N+]=C(N(C)C)N(C)C.Cl[Co-](Cl)Cl	0.02	4	190	90	-1	5	6124	63.9285	458.303	1.12408	262.055	145.893	50.355	791.189
C2TMG	Ser	CC[N+]=C(N(C)C)N(C)C.C(C(C(=O)[O-])N)O	0.02	4	180	90	-1	5	4906	62.7299	437.386	1.14504	267.062	119.11	51.2138	791.212
EMIM	FeCl4	CCN1C=C[N+](=C1)C.Cl[Fe-](Cl)(Cl)Cl	0.02	4	190	120	-1	5	2108	68.3195	362.853	1.2196	245.212	46.9916	70.6491	791.226
AMIM	ZnCl3	C[N+]1=CN(C=C1)CC=C.Cl[Zn-](Cl)Cl	0.04	4	190	120	-1	5	1852	73.6628	369.53	1.21383	227.425	76.5803	65.5244	791.681
DEIM	ZnCl4	CC[N]1C=C[N+](=C1)CC.Cl[Zn-2](Cl)(Cl)Cl	0.02	4	190	150	-1	5	1966	77.8107	339.914	1.24346	215.302	38.4803	86.1316	791.687
Ch	ZnCl3	C[N+](C)(C)CCO.Cl[Zn-](Cl)Cl	0.02	4	160	120	-1	5	1880	67.9447	359.37	1.22447	246.565	42.1401	70.6654	791.919
DMIM	MnCl3	CN1C=C[N+](=C1)C.Cl[Mn-](Cl)Cl	0.02	4	190	120	-1	5	1851	67.9976	358.815	1.22537	246.373	41.4579	70.9836	792.093
C6TMG	OH	CCCCCC[N+]=C(N(C)C)N(C)C.[OH-]	0.02	4	180	90	-1	5	7371	65.0251	479.681	1.10462	257.635	172.639	49.4061	792.151
N1111	ZnCl3	C[N+](C)(C)C.Cl[Zn-](Cl)Cl	0.06	4	170	90	-1	5	2044	71.4955	409.786	1.17462	234.319	130.622	44.8447	792.202
N1111	Ala	C[N+](C)(C)C.CC(C(=O)[O-])N	0.02	4	170	90	-1	5	3946	61.6959	420.914	1.16371	271.538	97.4081	51.9677	792.312
N2222	CoCl3	CC[N+](CC)(CC)CC.Cl[Co-](Cl)Cl	0.02	4	190	90	-1	5	7513	65.1637	482.079	1.10277	257.088	175.591	49.4006	792.424
TMG	For	[N+]=C(N(C)C)N(C)C.C(=O)[O-]	0.02	4	170	90	-1	5	3737	61.4805	417.211	1.16779	272.489	92.572	52.1498	792.499
N1111	ZnCl4	C[N+](C)(C)C.Cl[Zn-2](Cl)(Cl)Cl	0.04	4	180	120	-1	5	2368	74.5215	386.248	1.19928	224.805	96.7886	64.6551	792.763
C6TMG	ZnCl4	CCCCCC[N+]=C(N(C)C)N(C)C.Cl[Zn-2](Cl)(Cl)Cl	0.02	4	170	120	-1	5	5675	71.5358	422.242	1.16358	234.187	120.819	67.2355	792.913
TMG	Gly	[N+]=C(N(C)C)N(C)C.C(C(=O)[O-])N	0.02	4	170	90	-1	5	3820	61.5233	418.976	1.16697	272.3	94.5623	52.1135	792.975
N1111	ZnCl4	C[N+](C)(C)C.Cl[Zn-2](Cl)(Cl)Cl	0.02	4	190	150	-1	5	2368	78.0685	346.633	1.23935	214.591	46.1955	85.8471	792.993
N1111	ZnCl3	C[N+](C)(C)C.Cl[Zn-](Cl)Cl	0.04	4	160	90	-1	5	2044	65.5934	399.103	1.18695	255.403	94.9171	48.7821	793.027
N1111	ZnCl3	C[N+](C)(C)C.Cl[Zn-](Cl)Cl	0.02	4	180	150	-1	5	2044	77.7053	341.769	1.24447	215.594	40.0612	86.1136	793.122
Ch	Asp	C[N+](C)(C)CCO.C(C(C(=O)[O-])N)C(=O)O	0.02	4	180	90	-1	5	5125	62.7654	442.452	1.14439	266.911	124.356	51.1848	793.421
TMG	ZnCl3	[N+]=C(N(C)C)N(C)C.Cl[Zn-](Cl)Cl	0.02	4	180	150	-1	5	2717	78.314	352.2	1.2348	213.918	52.8377	85.4442	793.501
C4TMG	But	CCCC[N+]=C(N(C)C)N(C)C.CCCC(=O)[O-]	0.02	4	180	90	-1	5	5086	62.717	441.846	1.14527	267.117	123.505	51.2243	793.56
TMG	Lys	[N+]=C(N(C)C)N(C)C.C(CCN)CC(C(=O)[O-])N	0.02	4	190	90	-1	5	2912	60.6262	402.579	1.1853	276.329	73.1518	53.0978	793.94
AMIM	ZnCl4	C[N+]1=CN(C=C1)CC=C.Cl[Zn-2](Cl)(Cl)Cl	0.02	4	190	150	-1	5	2047	77.6369	342.263	1.24624	215.784	40.1554	86.3244	794.253
N1111	Gly	C[N+](C)(C)C.C(C(=O)[O-])N	0.02	4	190	90	-1	5	3001	60.6853	404.42	1.18415	276.06	75.3141	53.0461	794.284
C2TMG	ZnCl3	CC[N+]=C(N(C)C)N(C)C.Cl[Zn-](Cl)Cl	0.04	4	180	120	-1	5	3383	76.3189	417.661	1.17103	219.51	135.019	63.1324	794.347
C2TMG	ZnCl3	CC[N+]=C(N(C)C)N(C)C.Cl[Zn-](Cl)Cl	0.06	4	180	90	-1	5	3383	75.1773	471.181	1.11752	222.844	205.604	42.7341	794.35
EMIM	MnCl3	CCN1C=C[N+](=C1)C.Cl[Mn-](Cl)Cl	0.02	4	190	120	-1	5	1767	67.7123	358.437	1.23053	247.411	39.7432	71.2826	794.486
C2TMG	ZnCl3	CC[N+]=C(N(C)C)N(C)C.Cl[Zn-](Cl)Cl	0.02	4	190	150	-1	5	3383	78.8895	362.621	1.22645	212.357	65.3096	84.9538	794.538
DMIM	FeCl4	CN1C=C[N+](=C1)C.Cl[Fe-](Cl)(Cl)Cl	0.04	4	190	90	-1	5	2198	65.8365	405.048	1.18403	254.46	101.692	48.8957	794.539
N2222	ZnCl3	CC[N+](CC)(CC)CC.Cl[Zn-](Cl)Cl	0.06	4	190	90	-1	5	4258	77.6663	507.639	1.08212	215.702	250.489	41.4481	794.879
C8TMG	FeCl4	CCCCCCCC[N+]=C(N(C)C)N(C)C.Cl[Fe-](Cl)(Cl)Cl	0.02	4	180	90	-1	5	5745	63.2442	454.033	1.13573	264.89	138.345	50.7974	794.88
C6TMG	Lys	CCCCCC[N+]=C(N(C)C)N(C)C.C(CCN)CC(C(=O)[O-])N	0.02	4	180	90	-1	5	5164	62.687	443.953	1.14582	267.245	125.459	51.2489	794.888
AMIM	ZnCl3	C[N+]1=CN(C=C1)CC=C.Cl[Zn-](Cl)Cl	0.06	4	190	90	-1	5	1852	70.7498	401.889	1.18791	236.789	119.6	45.5	794.898
EMIM	ZnCl3	CCN1C=C[N+](=C1)C.Cl[Zn-](Cl)Cl	0.04	4	180	90	-1	5	1632	64.6978	385.429	1.20437	258.939	76.8342	49.6561	794.899
C2TMG	Ala	CC[N+]=C(N(C)C)N(C)C.CC(C(=O)[O-])N	0.02	4	180	90	-1	5	5200	62.7176	444.611	1.14526	267.114	126.272	51.2239	794.937
C4TMG	HCO3	CCCC[N+]=C(N(C)C)N(C)C.OC([O-])=O	0.02	4	180	90	-1	5	5227	62.7128	445.3	1.14535	267.135	126.938	51.2278	795.326
C4TMG	CrCl4	CCCC[N+]=C(N(C)C)N(C)C.Cl[Cr-](Cl)(Cl)Cl	0.02	4	190	90	-1	5	8593	65.9518	501.258	1.08959	254.015	198.432	48.8102	795.424
DEIM	FeCl4	CC[N]1C=C[N+](=C1)CC.Cl[Fe-](Cl)(Cl)Cl	0.02	4	190	120	-1	5	2233	68.0583	367.043	1.22428	246.153	49.9691	70.9202	795.66
Ch	FeCl4	C[N+](C)(C)CCO.Cl[Fe-](Cl)(Cl)Cl	0.02	4	190	90	-1	5	2345	59.9414	392.772	1.19884	279.486	59.5813	53.7045	795.808
Ch	ZnCl4	C[N+](C)(C)CCO.Cl[Zn-2](Cl)(Cl)Cl	0.04	4	170	120	-1	5	2102	73.6666	379.618	1.21262	227.414	86.9133	65.2907	796.121
N2222	ZnCl3	CC[N+](CC)(CC)CC.Cl[Zn-](Cl)Cl	0.02	4	190	150	-1	5	4258	79.5631	376.3	1.21607	210.56	81.5057	84.2345	796.185
C4TMG	Ac	CCCC[N+]=C(N(C)C)N(C)C.CC(=O)[O-]	0.02	4	180	90	-1	5	5305	62.7165	447.168	1.14528	267.119	128.824	51.2247	796.225
EMIM	ZnCl3	CCN1C=C[N+](=C1)C.Cl[Zn-](Cl)Cl	0.02	4	190	150	-1	5	1632	77.0328	336.743	1.25602	217.476	32.2655	87.0014	796.379
Ch	Ser	C[N+](C)(C)CCO.C(C(C(=O)[O-])N)O	0.02	4	190	90	-1	5	3200	60.6834	409.427	1.18419	276.069	80.3109	53.0478	796.807
DEIM	ZnCl4	CC[N]1C=C[N+](=C1)CC.Cl[Zn-2](Cl)(Cl)Cl	0.02	4	180	120	-1	5	1966	67.6665	363.032	1.23074	247.578	44.249	71.205	796.887
N2222	ZnCl4	CC[N+](CC)(CC)CC.Cl[Zn-2](Cl)(Cl)Cl	0.02	4	190	150	-1	5	5149	80.3397	389.553	1.20432	208.524	97.6082	83.4202	796.934
Ch	OH	C[N+](C)(C)CCO.[OH-]	0.04	4	190	90	-1	5	2579	66.3651	419.308	1.1746	252.433	118.368	48.5062	796.953
C2TMG	ZnCl4	CC[N+]=C(N(C)C)N(C)C.Cl[Zn-2](Cl)(Cl)Cl	0.04	4	180	120	-1	5	3985	77.2161	436.555	1.15743	216.96	157.197	62.3988	796.99
C2TMG	But	CC[N+]=C(N(C)C)N(C)C.CCCC(=O)[O-]	0.02	4	170	90	-1	5	4231	61.5992	428.621	1.16554	271.964	104.607	52.0493	797.079
C6TMG	ZnCl3	CCCCCC[N+]=C(N(C)C)N(C)C.Cl[Zn-](Cl)Cl	0.02	4	170	120	-1	5	4853	70.3734	411.427	1.1828	238.055	105.026	68.346	797.115
Ch	ZnCl4	C[N+](C)(C)CCO.Cl[Zn-2](Cl)(Cl)Cl	0.06	4	190	120	-1	5	2102	79.4345	392.568	1.20233	210.901	120.904	60.7634	797.447
DEIM	MnCl3	CC[N]1C=C[N+](=C1)CC.Cl[Mn-](Cl)Cl	0.02	4	190	120	-1	5	1924	67.608	362.527	1.23243	247.793	43.3412	71.3926	797.48
TMG	Ser	[N+]=C(N(C)C)N(C)C.C(C(C(=O)[O-])N)O	0.02	4	170	90	-1	5	4237	61.5638	429.016	1.16621	272.121	104.816	52.0792	797.611
N2222	ZnCl4	CC[N+](CC)(CC)CC.Cl[Zn-2](Cl)(Cl)Cl	0.04	4	190	120	-1	5	5149	79.3954	469.336	1.12619	211.004	197.538	60.7933	797.763
N2222	But	CC[N+](CC)(CC)CC.CCCC(=O)[O-]	0.02	4	180	90	-1	5	5497	62.7593	451.522	1.1445	266.937	133.396	51.1898	798.012
EMIM	ZnCl3	CCN1C=C[N+](=C1)C.Cl[Zn-](Cl)Cl	0.02	4	180	120	-1	5	1632	67.2425	357.757	1.2385	249.14	36.9633	71.6541	798.13
C2TMG	HCO3	CC[N+]=C(N(C)C)N(C)C.OC([O-])=O	0.02	4	170	90	-1	5	4282	61.566	430.113	1.16616	272.111	105.925	52.0773	798.139
TMG	ZnCl4	[N+]=C(N(C)C)N(C)C.Cl[Zn-2](Cl)(Cl)Cl	0.02	4	180	150	-1	5	3192	78.3062	361.474	1.23493	213.939	62.0813	85.4528	798.2
AMIM	ZnCl4	C[N+]1=CN(C=C1)CC=C.Cl[Zn-2](Cl)(Cl)Cl	0.06	4	190	90	-1	5	2047	71.0011	413.015	1.1837	235.951	131.725	45.339	798.359
C4TMG	Gly	CCCC[N+]=C(N(C)C)N(C)C.C(C(=O)[O-])N	0.02	4	180	90	-1	5	5491	62.7226	451.641	1.14517	267.093	133.328	51.2198	798.407
C6TMG	OH	CCCCCC[N+]=C(N(C)C)N(C)C.[OH-]	0.02	4	190	90	-1	5	7371	64.5281	483.476	1.11363	259.62	173.969	49.8871	798.552
TMG	HCO3	[N+]=C(N(C)C)N(C)C.OC([O-])=O	0.02	4	190	90	-1	5	3346	60.6861	413.073	1.18413	276.056	83.9713	53.0454	798.603
C2TMG	Ac	CC[N+]=C(N(C)C)N(C)C.CC(=O)[O-]	0.02	4	170	90	-1	5	4361	61.5919	431.886	1.16567	271.996	107.834	52.0554	798.78
C4TMG	Lys	CCCC[N+]=C(N(C)C)N(C)C.C(CCN)CC(C(=O)[O-])N	0.02	4	170	90	-1	5	4371	61.5868	432.169	1.16577	272.019	108.09	52.0598	798.97
EMIM	ZnCl4	CCN1C=C[N+](=C1)C.Cl[Zn-2](Cl)(Cl)Cl	0.04	4	180	90	-1	5	1769	64.6103	392.41	1.206	259.29	83.397	49.7233	799.206
Ch	CoCl3	C[N+](C)(C)CCO.Cl[Co-](Cl)Cl	0.02	4	190	90	-1	5	5392	62.5748	450.401	1.14839	267.724	131.233	51.4443	799.396
Ch	Ala	C[N+](C)(C)CCO.CC(C(=O)[O-])N	0.02	4	190	90	-1	5	3412	60.6767	414.794	1.18432	276.099	85.6409	53.0537	799.555
TMG	But	[N+]=C(N(C)C)N(C)C.CCCC(=O)[O-]	0.02	4	190	90	-1	5	3408	60.6616	414.796	1.18461	276.168	85.5618	53.0669	799.704
TMG	Ac	[N+]=C(N(C)C)N(C)C.CC(=O)[O-]	0.02	4	190	90	-1	5	3427	60.6739	415.189	1.18437	276.112	86.0213	53.0561	799.78
C4TMG	Ser	CCCC[N+]=C(N(C)C)N(C)C.C(C(C(=O)[O-])N)O	0.02	4	180	90	-1	5	5639	62.7296	455.183	1.14504	267.063	136.906	51.214	800.113
C8TMG	CoCl3	CCCCCCCC[N+]=C(N(C)C)N(C)C.Cl[Co-](Cl)Cl	0.02	4	180	90	-1	5	8116	65.0813	496.701	1.10367	257.413	189.924	49.3635	800.185
Ch	ZnCl4	C[N+](C)(C)CCO.Cl[Zn-2](Cl)(Cl)Cl	0.02	4	160	120	-1	5	2102	67.4529	367.003	1.2334	248.362	47.4598	71.1807	800.2
C4TMG	For	CCCC[N+]=C(N(C)C)N(C)C.C(=O)[O-]	0.02	4	180	90	-1	5	5655	62.7133	455.691	1.14534	267.133	137.331	51.2274	800.516
N2222	HCO3	CC[N+](CC)(CC)CC.OC([O-])=O	0.02	4	180	90	-1	5	5725	62.7607	457.045	1.14448	266.931	138.925	51.1887	800.761
N2222	Lys	CC[N+](CC)(CC)CC.C(CCN)CC(C(=O)[O-])N	0.02	4	170	90	-1	5	4590	61.635	437.243	1.16486	271.806	113.417	52.019	801.051
N1111	ZnCl3	C[N+](C)(C)C.Cl[Zn-](Cl)Cl	0.04	4	170	120	-1	5	2044	73.085	380.221	1.22227	229.223	85.1877	65.8103	801.247
TMG	Ala	[N+]=C(N(C)C)N(C)C.CC(C(=O)[O-])N	0.02	4	170	90	-1	5	4521	61.5352	436.244	1.16675	272.247	111.893	52.1034	801.496
N1111	Asp	C[N+](C)(C)C.C(C(C(=O)[O-])N)C(=O)O	0.02	4	180	90	-1	5	5793	62.7539	458.745	1.1446	266.96	140.591	51.1942	801.672
N2222	Ac	CC[N+](CC)(CC)CC.CC(=O)[O-]	0.02	4	180	90	-1	5	5825	62.7659	459.434	1.14438	266.909	141.34	51.1844	801.908
C2TMG	Gly	CC[N+]=C(N(C)C)N(C)C.C(C(=O)[O-])N	0.02	4	170	90	-1	5	4637	61.6003	438.651	1.16552	271.959	114.643	52.0484	802.084
N1111	ZnCl3	C[N+](C)(C)C.Cl[Zn-](Cl)Cl	0.02	4	160	120	-1	5	2044	67.2269	366.923	1.23754	249.198	46.3054	71.42	802.233
N1111	ZnCl3	C[N+](C)(C)C.Cl[Zn-](Cl)Cl	0.06	4	190	120	-1	5	2044	78.7731	392.5	1.21242	212.671	118.555	61.2736	802.461
N1111	Ser	C[N+](C)(C)C.C(C(C(=O)[O-])N)O	0.02	4	190	90	-1	5	3650	60.6792	420.75	1.18427	276.087	91.6108	53.0514	802.508
C2TMG	Lys	CC[N+]=C(N(C)C)N(C)C.C(CCN)CC(C(=O)[O-])N	0.02	4	190	90	-1	5	3619	60.6355	420.274	1.18512	276.286	90.8982	53.0897	802.697
C6TMG	FeCl4	CCCCCC[N+]=C(N(C)C)N(C)C.Cl[Fe-](Cl)(Cl)Cl	0.02	4	180	90	-1	5	5013	61.9257	445.697	1.15991	270.53	123.288	51.8789	802.802
TMG	ZnCl3	[N+]=C(N(C)C)N(C)C.Cl[Zn-](Cl)Cl	0.06	4	170	90	-1	5	2717	72.4537	446.806	1.15908	231.22	171.334	44.2516	802.945
C2TMG	For	CC[N+]=C(N(C)C)N(C)C.C(=O)[O-]	0.02	4	170	90	-1	5	4693	61.582	440.166	1.16586	272.04	116.062	52.0639	803.014
AMIM	FeCl4	C[N+]1=CN(C=C1)CC=C.Cl[Fe-](Cl)(Cl)Cl	0.04	4	190	90	-1	5	2292	65.3015	412.75	1.19373	256.545	106.909	49.2963	803.239
DEIM	ZnCl4	CC[N]1C=C[N+](=C1)CC.Cl[Zn-2](Cl)(Cl)Cl	0.04	4	180	90	-1	5	1966	64.6415	401.503	1.20542	259.165	92.6395	49.6993	803.461
TMG	For	[N+]=C(N(C)C)N(C)C.C(=O)[O-]	0.02	4	190	90	-1	5	3737	60.6732	422.975	1.18438	276.115	93.8038	53.0567	803.68
C8TMG	ZnCl3	CCCCCCCC[N+]=C(N(C)C)N(C)C.Cl[Zn-](Cl)Cl	0.04	4	180	90	-1	5	5644	71.5883	519.034	1.08845	234.015	240.142	44.8765	803.74
C4TMG	ZnCl4	CCCC[N+]=C(N(C)C)N(C)C.Cl[Zn-2](Cl)(Cl)Cl	0.04	4	190	120	-1	5	4814	78.1533	463.739	1.14409	214.358	187.622	61.7595	803.913
C2TMG	MnCl3	CC[N+]=C(N(C)C)N(C)C.Cl[Mn-](Cl)Cl	0.02	4	180	90	-1	5	3564	60.465	419.967	1.18793	277.066	89.7693	53.1322	803.949
C4TMG	Ala	CCCC[N+]=C(N(C)C)N(C)C.CC(C(=O)[O-])N	0.02	4	180	90	-1	5	5947	62.7205	462.729	1.14521	267.102	144.405	51.2215	803.969
C2TMG	ZnCl4	CC[N+]=C(N(C)C)N(C)C.Cl[Zn-2](Cl)(Cl)Cl	0.06	4	180	90	-1	5	3985	75.9852	502.369	1.10564	220.474	239.615	42.2798	804.003
N2222	Gly	CC[N+](CC)(CC)CC.C(C(=O)[O-])N	0.02	4	180	90	-1	5	6010	62.7675	463.911	1.14435	266.902	145.826	51.1831	804.131
EMIM	CoCl4	CCN1C=C[N+](=C1)C.Cl[Co-2](Cl)(Cl)Cl	0.02	4	180	90	-1	5	4435	61.2558	436.201	1.17259	273.489	110.266	52.4463	804.398
Ch	ZnCl3	C[N+](C)(C)CCO.Cl[Zn-](Cl)Cl	0.06	4	180	120	-1	5	1880	78.0817	386.269	1.22261	214.554	110.008	61.7071	804.441
C6TMG	But	CCCCCC[N+]=C(N(C)C)N(C)C.CCCC(=O)[O-]	0.02	4	180	90	-1	5	5969	62.7009	463.407	1.14557	267.185	144.985	51.2375	804.488
TMG	Gly	[N+]=C(N(C)C)N(C)C.C(C(=O)[O-])N	0.02	4	190	90	-1	5	3820	60.6754	425.044	1.18434	276.105	95.8837	53.0548	804.693
TMG	Asp	[N+]=C(N(C)C)N(C)C.C(C(C(=O)[O-])N)C(=O)O	0.02	4	180	90	-1	5	5966	62.6789	463.497	1.14597	267.279	144.963	51.2555	804.733
TMG	OH	[N+]=C(N(C)C)N(C)C.[OH-]	0.02	4	170	90	-1	5	4352	61.126	434.953	1.17456	274.069	108.432	52.4522	804.756
C8TMG	Lys	CCCCCCCC[N+]=C(N(C)C)N(C)C.C(CCN)CC(C(=O)[O-])N	0.02	4	180	90	-1	5	5988	62.6853	463.984	1.14585	267.252	145.482	51.2502	804.918
N2222	ZnCl3	CC[N+](CC)(CC)CC.Cl[Zn-](Cl)Cl	0.04	4	180	120	-1	5	4258	76.9708	448.75	1.16111	217.651	168.501	62.5977	804.932
C2TMG	Ser	CC[N+]=C(N(C)C)N(C)C.C(C(C(=O)[O-])N)O	0.02	4	170	90	-1	5	4906	61.6225	445.141	1.1651	271.862	121.25	52.0296	805.119
C6TMG	CoCl3	CCCCCC[N+]=C(N(C)C)N(C)C.Cl[Co-](Cl)Cl	0.02	4	180	90	-1	5	7501	64.0927	489.748	1.12069	261.384	178.24	50.1249	805.22
N2222	Ser	CC[N+](CC)(CC)CC.C(C(C(=O)[O-])N)O	0.02	4	180	90	-1	5	6118	62.7796	466.441	1.14413	266.85	148.417	51.1732	805.286
TMG	ZnCl3	[N+]=C(N(C)C)N(C)C.Cl[Zn-](Cl)Cl	0.04	4	160	90	-1	5	2717	65.8661	428.573	1.18204	254.346	125.647	48.5802	805.305
N1111	OH	C[N+](C)(C)C.[OH-]	0.04	4	190	90	-1	5	3254	66.9403	446.419	1.16451	250.264	148.066	48.0894	805.462
AMIM	FeCl4	C[N+]1=CN(C=C1)CC=C.Cl[Fe-](Cl)(Cl)Cl	0.02	4	190	120	-1	5	2292	67.2827	372.609	1.23839	248.991	51.8806	71.7378	805.5
DMIM	CoCl4	CN1C=C[N+](=C1)C.Cl[Co-2](Cl)(Cl)Cl	0.02	4	180	90	-1	5	4734	61.4329	442.356	1.16921	272.7	117.36	52.2951	805.785
C8TMG	OH	CCCCCCCC[N+]=C(N(C)C)N(C)C.[OH-]	0.02	4	180	90	-1	5	8374	64.8496	504.534	1.10761	258.333	196.662	49.5398	806.072
C2TMG	ZnCl4	CC[N+]=C(N(C)C)N(C)C.Cl[Zn-2](Cl)(Cl)Cl	0.02	4	180	150	-1	5	3985	78.2801	377.022	1.23534	214.011	77.5302	85.4813	806.179
AMIM	MnCl3	C[N+]1=CN(C=C1)CC=C.Cl[Mn-](Cl)Cl	0.02	4	190	120	-1	5	1989	66.9375	367.637	1.24478	250.275	45.2543	72.1077	806.208
Ch	ZnCl4	C[N+](C)(C)CCO.Cl[Zn-2](Cl)(Cl)Cl	0.08	4	180	90	-1	5	2102	76.2044	430.036	1.1824	219.84	168.038	42.1582	806.217
N1111	Ala	C[N+](C)(C)C.CC(C(=O)[O-])N	0.02	4	190	90	-1	5	3946	60.6788	428.182	1.18428	276.09	99.0409	53.0519	806.229
Ch	Leu	C[N+](C)(C)CCO.CC(C)CC(C(=O)[O-])N	0.02	4	180	90	-1	5	6166	62.7451	467.863	1.14476	266.997	149.664	51.2014	806.312
C4TMG	ZnCl3	CCCC[N+]=C(N(C)C)N(C)C.Cl[Zn-](Cl)Cl	0.04	4	190	120	-1	5	4096	76.5642	444.799	1.16783	218.807	162.951	63.0413	806.316
C8TMG	ZnCl3	CCCCCCCC[N+]=C(N(C)C)N(C)C.Cl[Zn-](Cl)Cl	0.02	4	160	90	-1	5	5644	62.1796	459.126	1.15414	269.426	138.24	51.4604	806.635
C4TMG	ZnCl4	CCCC[N+]=C(N(C)C)N(C)C.Cl[Zn-2](Cl)(Cl)Cl	0.02	4	190	150	-1	5	4814	79.0537	389.436	1.22391	211.916	92.7423	84.7773	806.671
Ch	Asp	C[N+](C)(C)CCO.C(C(C(=O)[O-])N)C(=O)O	0.02	4	170	90	-1	5	5125	61.6751	450.169	1.1641	271.629	126.555	51.9852	807.135
TMG	ZnCl3	[N+]=C(N(C)C)N(C)C.Cl[Zn-](Cl)Cl	0.04	4	170	120	-1	5	2717	73.8212	404.198	1.21008	226.937	112.107	65.1539	807.141
C6TMG	HCO3	CCCCCC[N+]=C(N(C)C)N(C)C.OC([O-])=O	0.02	4	180	90	-1	5	6184	62.6965	468.663	1.14565	267.204	150.217	51.2411	807.156
C8TMG	ZnCl4	CCCCCCCC[N+]=C(N(C)C)N(C)C.Cl[Zn-2](Cl)(Cl)Cl	0.04	4	180	90	-1	5	6559	72.9951	547.213	1.06747	229.506	273.696	44.0117	807.342
C4TMG	But	CCCC[N+]=C(N(C)C)N(C)C.CCCC(=O)[O-]	0.02	4	170	90	-1	5	5086	61.6053	449.715	1.16542	271.937	125.734	52.0441	807.568
N2222	For	CC[N+](CC)(CC)CC.C(=O)[O-]	0.02	4	180	90	-1	5	6298	62.7622	470.939	1.14445	266.925	152.827	51.1875	807.694
Ch	OH	C[N+](C)(C)CCO.[OH-]	0.04	4	180	90	-1	5	2579	65.449	425.078	1.19055	255.967	120.025	49.0862	807.813
C6TMG	Ac	CCCCCC[N+]=C(N(C)C)N(C)C.CC(=O)[O-]	0.02	4	180	90	-1	5	6260	62.7051	470.445	1.14549	267.168	152.043	51.2341	807.968
DEIM	ZnCl3	CC[N]1C=C[N+](=C1)CC.Cl[Zn-](Cl)Cl	0.04	4	180	90	-1	5	1790	63.9433	397.503	1.21858	261.994	85.2672	50.2419	808.042
DEIM	ZnCl3	CC[N]1C=C[N+](=C1)CC.Cl[Zn-](Cl)Cl	0.02	4	190	150	-1	5	1790	76.0229	344.381	1.2727	220.365	35.8594	88.1571	808.541
C8TMG	ZnCl4	CCCCCCCC[N+]=C(N(C)C)N(C)C.Cl[Zn-2](Cl)(Cl)Cl	0.02	4	160	90	-1	5	6559	62.8729	476.227	1.14142	266.455	158.88	50.893	808.822
C6TMG	Lys	CCCCCC[N+]=C(N(C)C)N(C)C.C(CCN)CC(C(=O)[O-])N	0.02	4	170	90	-1	5	5164	61.5779	451.845	1.16594	272.058	127.719	52.0673	808.893
C2TMG	Ala	CC[N+]=C(N(C)C)N(C)C.CC(C(=O)[O-])N	0.02	4	170	90	-1	5	5200	61.6056	452.531	1.16541	271.936	128.551	52.0439	808.973
AMIM	ZnCl3	C[N+]1=CN(C=C1)CC=C.Cl[Zn-](Cl)Cl	0.02	4	190	150	-1	5	1852	76.0384	345.553	1.27244	220.32	37.0938	88.1391	808.997
AMIM	ZnCl4	C[N+]1=CN(C=C1)CC=C.Cl[Zn-2](Cl)(Cl)Cl	0.02	4	180	120	-1	5	2047	66.7103	370.085	1.24838	251.127	46.7325	72.2257	809.234
DMIM	ZnCl4	CN1C=C[N+](=C1)C.Cl[Zn-2](Cl)(Cl)Cl	0.04	4	180	90	-1	5	1877	64.0108	401.224	1.2173	261.718	89.3172	50.189	809.26
C6TMG	Gly	CCCCCC[N+]=C(N(C)C)N(C)C.C(C(=O)[O-])N	0.02	4	180	90	-1	5	6375	62.7098	473.202	1.14541	267.148	154.824	51.2302	809.304
C2TMG	Asp	CC[N+]=C(N(C)C)N(C)C.C(C(C(=O)[O-])N)C(=O)O	0.02	4	180	90	-1	5	6384	62.7098	473.421	1.14541	267.148	155.043	51.2303	809.414
C4TMG	HCO3	CCCC[N+]=C(N(C)C)N(C)C.OC([O-])=O	0.02	4	170	90	-1	5	5227	61.5783	453.4	1.16593	272.057	129.276	52.067	809.666
C2TMG	CrCl4	CC[N+]=C(N(C)C)N(C)C.Cl[Cr-](Cl)(Cl)Cl	0.02	4	190	90	-1	5	8300	64.51	505.544	1.11394	259.693	195.95	49.9011	809.743
C6TMG	Ser	CCCCCC[N+]=C(N(C)C)N(C)C.C(C(C(=O)[O-])N)O	0.02	4	180	90	-1	5	6422	62.7163	474.294	1.14529	267.12	155.949	51.2249	809.79
TMG	ZnCl3	[N+]=C(N(C)C)N(C)C.Cl[Zn-](Cl)Cl	0.08	4	190	90	-1	5	2717	78.1976	467.068	1.15267	214.236	211.665	41.1665	809.87
C2TMG	But	CC[N+]=C(N(C)C)N(C)C.CCCC(=O)[O-]	0.02	4	190	90	-1	5	4231	60.6722	435.383	1.1844	276.12	106.206	53.0576	809.894
C2TMG	OH	CC[N+]=C(N(C)C)N(C)C.[OH-]	0.02	4	170	90	-1	5	5363	61.6827	455.99	1.16396	271.596	132.415	51.9788	809.974
TMG	Ser	[N+]=C(N(C)C)N(C)C.C(C(C(=O)[O-])N)O	0.02	4	190	90	-1	5	4237	60.6665	435.574	1.18452	276.145	106.366	53.0626	810.045
C2TMG	HCO3	CC[N+]=C(N(C)C)N(C)C.OC([O-])=O	0.02	4	190	90	-1	5	4282	60.6962	436.49	1.18394	276.01	107.443	53.0366	810.213
C4TMG	Ac	CCCC[N+]=C(N(C)C)N(C)C.CC(=O)[O-]	0.02	4	170	90	-1	5	5305	61.5981	455.183	1.16556	271.969	131.163	52.0502	810.37
N2222	Ala	CC[N+](CC)(CC)CC.CC(C(=O)[O-])N	0.02	4	180	90	-1	5	6519	62.7586	476.329	1.14451	266.94	158.198	51.1904	810.422
C2TMG	ZnCl3	CC[N+]=C(N(C)C)N(C)C.Cl[Zn-](Cl)Cl	0.02	4	180	150	-1	5	3383	77.299	369.947	1.25102	216.727	66.6534	86.5662	810.481
TMG	ZnCl3	[N+]=C(N(C)C)N(C)C.Cl[Zn-](Cl)Cl	0.02	4	160	120	-1	5	2717	67.1386	382.672	1.23917	249.525	61.6328	71.514	810.922
N1111	OH	C[N+](C)(C)C.[OH-]	0.02	4	190	120	-1	5	3254	67.7134	391.876	1.23051	247.407	73.1875	71.2815	811.195
C6TMG	ZnCl3	CCCCCC[N+]=C(N(C)C)N(C)C.Cl[Zn-](Cl)Cl	0.04	4	170	90	-1	5	4853	69.4159	500.476	1.12205	241.339	212.949	46.1882	811.262
Ch	OH	C[N+](C)(C)CCO.[OH-]	0.02	4	190	120	-1	5	2579	67.0697	380.309	1.24232	249.781	58.5624	71.9656	811.317
C2TMG	Ac	CC[N+]=C(N(C)C)N(C)C.CC(=O)[O-]	0.02	4	190	90	-1	5	4361	60.6813	438.58	1.18423	276.078	109.452	53.0496	811.403
N1111	ZnCl3	C[N+](C)(C)C.Cl[Zn-](Cl)Cl	0.08	4	180	90	-1	5	2044	75.4856	429.45	1.19366	221.933	164.957	42.5596	811.553
C4TMG	ZnCl3	CCCC[N+]=C(N(C)C)N(C)C.Cl[Zn-](Cl)Cl	0.06	4	190	90	-1	5	4096	75.5952	511.756	1.11177	221.612	247.56	42.5837	811.761
N2222	But	CC[N+](CC)(CC)CC.CCCC(=O)[O-]	0.02	4	170	90	-1	5	5497	61.672	459.379	1.16416	271.643	135.747	51.9879	811.77
C8TMG	ZnCl4	CCCCCCCC[N+]=C(N(C)C)N(C)C.Cl[Zn-2](Cl)(Cl)Cl	0.02	4	170	120	-1	5	6559	70.6959	446.302	1.17741	236.97	141.299	68.0343	811.855
N2222	ZnCl3	CC[N+](CC)(CC)CC.Cl[Zn-](Cl)Cl	0.02	4	180	150	-1	5	4258	77.9795	383.807	1.2401	214.836	83.1609	85.8107	811.953
C4TMG	Lys	CCCC[N+]=C(N(C)C)N(C)C.C(CCN)CC(C(=O)[O-])N	0.02	4	190	90	-1	5	4371	60.6386	439.14	1.18506	276.273	109.781	53.087	812.101
C6TMG	For	CCCCCC[N+]=C(N(C)C)N(C)C.C(=O)[O-]	0.02	4	180	90	-1	5	6625	62.701	479.341	1.14557	267.185	160.918	51.2374	812.454
C4TMG	Gly	CCCC[N+]=C(N(C)C)N(C)C.C(C(=O)[O-])N	0.02	4	170	90	-1	5	5491	61.6032	459.743	1.16546	271.947	135.751	52.0459	812.602
DEIM	CoCl4	CC[N]1C=C[N+](=C1)CC.Cl[Co-2](Cl)(Cl)Cl	0.02	4	180	90	-1	5	4469	60.6374	441.503	1.18455	276.278	112.244	52.9811	813.027
C6TMG	MnCl3	CCCCCC[N+]=C(N(C)C)N(C)C.Cl[Mn-](Cl)Cl	0.02	4	190	120	-1	5	5048	69.2051	422.909	1.20399	242.074	111.09	69.745	813.45
N2222	ZnCl4	CC[N+](CC)(CC)CC.Cl[Zn-2](Cl)(Cl)Cl	0.02	4	180	150	-1	5	5149	78.6669	397.703	1.22926	212.958	99.6838	85.0609	813.482
TMG	Ala	[N+]=C(N(C)C)N(C)C.CC(C(=O)[O-])N	0.02	4	190	90	-1	5	4521	60.6665	442.703	1.18451	276.145	113.496	53.0625	813.609
Ch	ZnCl3	C[N+](C)(C)CCO.Cl[Zn-](Cl)Cl	0.02	4	170	150	-1	5	1880	75.5405	348.119	1.27945	221.772	37.9029	88.4438	813.786
C6TMG	Ala	CCCCCC[N+]=C(N(C)C)N(C)C.CC(C(=O)[O-])N	0.02	4	180	90	-1	5	6744	62.7035	482.212	1.14552	267.174	163.802	51.2354	813.866
N1111	OH	C[N+](C)(C)C.[OH-]	0.02	4	170	90	-1	5	3254	59.4031	419.418	1.20863	282.019	83.4263	53.9735	814.022
N2222	ZnCl3	CC[N+](CC)(CC)CC.Cl[Zn-](Cl)Cl	0.06	4	180	90	-1	5	4258	75.8151	519.948	1.10812	220.969	256.605	42.3746	814.032
N2222	ZnCl4	CC[N+](CC)(CC)CC.Cl[Zn-2](Cl)(Cl)Cl	0.06	4	190	90	-1	5	5149	78.3255	555.341	1.07301	213.887	300.355	41.0993	814.176
C4TMG	Ser	CCCC[N+]=C(N(C)C)N(C)C.C(C(C(=O)[O-])N)O	0.02	4	170	90	-1	5	5639	61.6219	463.261	1.16511	271.864	139.367	52.0301	814.184
DEIM	ZnCl3	CC[N]1C=C[N+](=C1)CC.Cl[Zn-](Cl)Cl	0.02	4	180	120	-1	5	1790	66.0546	367.834	1.26078	253.62	41.2709	72.9426	814.305
C4TMG	MnCl3	CCCC[N+]=C(N(C)C)N(C)C.Cl[Mn-](Cl)Cl	0.02	4	190	120	-1	5	4284	68.4073	410.832	1.21803	244.897	95.3764	70.5584	814.432
C8TMG	ZnCl3	CCCCCCCC[N+]=C(N(C)C)N(C)C.Cl[Zn-](Cl)Cl	0.02	4	170	120	-1	5	5644	69.5984	433.317	1.19597	240.706	123.504	69.107	814.646
N1111	MnCl3	C[N+](C)(C)C.Cl[Mn-](Cl)Cl	0.02	4	190	90	-1	5	2219	58.4306	399.643	1.22984	286.712	57.8377	55.093	814.742
N2222	HCO3	CC[N+](CC)(CC)CC.OC([O-])=O	0.02	4	170	90	-1	5	5725	61.6533	465.15	1.16451	271.725	141.421	52.0036	814.831
C4TMG	For	CCCC[N+]=C(N(C)C)N(C)C.C(=O)[O-]	0.02	4	170	90	-1	5	5655	61.5867	463.922	1.16577	272.019	139.843	52.0599	814.847
C2TMG	Gly	CC[N+]=C(N(C)C)N(C)C.C(C(=O)[O-])N	0.02	4	190	90	-1	5	4637	60.6795	445.52	1.18426	276.086	116.383	53.0512	814.891
N2222	Lys	CC[N+](CC)(CC)CC.C(CCN)CC(C(=O)[O-])N	0.02	4	190	90	-1	5	4590	60.6232	444.753	1.18536	276.342	115.31	53.1004	815.057
N1111	ZnCl4	C[N+](C)(C)C.Cl[Zn-2](Cl)(Cl)Cl	0.02	4	180	150	-1	5	2368	75.901	356.394	1.27406	220.719	47.5147	88.1606	815.226
C8TMG	OH	CCCCCCCC[N+]=C(N(C)C)N(C)C.[OH-]	0.02	4	190	90	-1	5	8374	64.1318	510.283	1.12051	261.224	198.863	50.1954	815.397
C2TMG	For	CC[N+]=C(N(C)C)N(C)C.C(=O)[O-]	0.02	4	190	90	-1	5	4693	60.685	446.885	1.18415	276.061	117.778	53.0464	815.52
N1111	Asp	C[N+](C)(C)C.C(C(C(=O)[O-])N)C(=O)O	0.02	4	170	90	-1	5	5793	61.6639	466.749	1.16431	271.679	143.076	51.9947	815.531
C8TMG	But	CCCCCCCC[N+]=C(N(C)C)N(C)C.CCCC(=O)[O-]	0.02	4	180	90	-1	5	6873	62.6935	485.423	1.1457	267.217	166.962	51.2436	815.563
C4TMG	Asp	CCCC[N+]=C(N(C)C)N(C)C.C(C(C(=O)[O-])N)C(=O)O	0.02	4	180	90	-1	5	6913	62.7173	486.21	1.14527	267.116	167.87	51.2241	815.739
N2222	Ac	CC[N+](CC)(CC)CC.CC(=O)[O-]	0.02	4	170	90	-1	5	5825	61.6766	467.443	1.16407	271.623	143.837	51.9839	815.758
Ch	Arg	C[N+](C)(C)CCO.C(CC(C(=O)[O-])N)CN=C(N)N	0.02	4	180	90	-1	5	6996	62.7666	487.842	1.14437	266.906	169.752	51.1839	816.105
N2222	ZnCl4	CC[N+](CC)(CC)CC.Cl[Zn-2](Cl)(Cl)Cl	0.04	4	180	120	-1	5	5149	77.5796	480.211	1.152	215.943	202.162	62.1065	816.107
TMG	ZnCl4	[N+]=C(N(C)C)N(C)C.Cl[Zn-2](Cl)(Cl)Cl	0.02	4	160	120	-1	5	3192	67.1407	393.434	1.23913	249.517	72.4054	71.5117	816.283
C4TMG	CoCl3	CCCC[N+]=C(N(C)C)N(C)C.Cl[Co-](Cl)Cl	0.02	4	180	90	-1	5	6951	62.7056	487.223	1.14548	267.165	168.824	51.2336	816.352
N1111	Leu	C[N+](C)(C)C.CC(C)CC(C(=O)[O-])N	0.02	4	180	90	-1	5	6994	62.7323	488.06	1.145	267.052	169.797	51.2119	816.528
Ch	ZnCl4	C[N+](C)(C)CCO.Cl[Zn-2](Cl)(Cl)Cl	0.06	4	180	120	-1	5	2102	77.5434	402.032	1.2311	216.044	123.852	62.1355	816.567
C4TMG	ZnCl3	CCCC[N+]=C(N(C)C)N(C)C.Cl[Zn-](Cl)Cl	0.02	4	190	150	-1	5	4096	77.4209	383.525	1.24972	216.386	80.5742	86.5653	816.622
C8TMG	MnCl3	CCCCCCCC[N+]=C(N(C)C)N(C)C.Cl[Mn-](Cl)Cl	0.02	4	190	120	-1	5	5846	69.6709	437.526	1.19594	240.456	127.791	69.2787	816.733
C4TMG	ZnCl4	CCCC[N+]=C(N(C)C)N(C)C.Cl[Zn-2](Cl)(Cl)Cl	0.06	4	190	90	-1	5	4814	77.1326	544.086	1.08961	217.194	285.156	41.7349	816.846
TMG	ZnCl3	[N+]=C(N(C)C)N(C)C.Cl[Zn-](Cl)Cl	0.06	4	190	120	-1	5	2717	79.237	429.008	1.20532	211.426	156.667	60.9148	817.165
TMG	Leu	[N+]=C(N(C)C)N(C)C.CC(C)CC(C(=O)[O-])N	0.02	4	180	90	-1	5	6971	62.6584	488.077	1.14635	267.367	169.438	51.2723	817.211
C4TMG	FeCl4	CCCC[N+]=C(N(C)C)N(C)C.Cl[Fe-](Cl)(Cl)Cl	0.02	4	180	90	-1	5	4321	60.189	441.048	1.19338	278.336	109.336	53.3759	817.213
C6TMG	ZnCl4	CCCCCC[N+]=C(N(C)C)N(C)C.Cl[Zn-2](Cl)(Cl)Cl	0.04	4	170	90	-1	5	5675	70.4064	528.997	1.10626	237.944	245.515	45.5384	817.631
N2222	Gly	CC[N+](CC)(CC)CC.C(C(=O)[O-])N	0.02	4	170	90	-1	5	6010	61.6789	471.994	1.16403	271.613	148.399	51.982	818.012
C4TMG	Ala	CCCC[N+]=C(N(C)C)N(C)C.CC(C(=O)[O-])N	0.02	4	170	90	-1	5	5947	61.6049	471.004	1.16543	271.939	147.02	52.0445	818.216
C2TMG	Ser	CC[N+]=C(N(C)C)N(C)C.C(C(C(=O)[O-])N)O	0.02	4	190	90	-1	5	4906	60.675	452.306	1.18435	276.107	123.144	53.0552	818.328
Ch	ZnCl3	C[N+](C)(C)CCO.Cl[Zn-](Cl)Cl	0.04	4	190	150	-1	5	1880	80.6625	361.768	1.27502	207.69	70.9922	83.0865	818.395
TMG	ZnCl4	[N+]=C(N(C)C)N(C)C.Cl[Zn-2](Cl)(Cl)Cl	0.04	4	160	90	-1	5	3192	65.6729	451.865	1.18551	255.094	148.047	48.7231	818.689
C6TMG	But	CCCCCC[N+]=C(N(C)C)N(C)C.CCCC(=O)[O-]	0.02	4	170	90	-1	5	5969	61.5884	471.674	1.16574	272.012	147.604	52.0584	818.707
C8TMG	HCO3	CCCCCCCC[N+]=C(N(C)C)N(C)C.OC([O-])=O	0.02	4	180	90	-1	5	7149	62.69	492.155	1.14577	267.232	173.676	51.2464	818.961
TMG	ZnCl4	[N+]=C(N(C)C)N(C)C.Cl[Zn-2](Cl)(Cl)Cl	0.04	4	170	120	-1	5	3192	73.6345	424.872	1.21315	227.513	132.04	65.3191	819.012
C8TMG	Lys	CCCCCCCC[N+]=C(N(C)C)N(C)C.C(CCN)CC(C(=O)[O-])N	0.02	4	170	90	-1	5	5988	61.5735	472.258	1.16602	272.078	148.109	52.071	819.141
N2222	Ser	CC[N+](CC)(CC)CC.C(C(C(=O)[O-])N)O	0.02	4	170	90	-1	5	6118	61.6901	474.575	1.16382	271.563	151.039	51.9726	819.197
TMG	Asp	[N+]=C(N(C)C)N(C)C.C(C(C(=O)[O-])N)C(=O)O	0.02	4	170	90	-1	5	5966	61.5372	471.992	1.16671	272.238	147.652	52.1017	819.351
C4TMG	OH	CCCC[N+]=C(N(C)C)N(C)C.[OH-]	0.02	4	170	90	-1	5	6368	61.9043	479.083	1.15979	270.624	156.667	51.7928	819.438
C8TMG	Ac	CCCCCCCC[N+]=C(N(C)C)N(C)C.CC(=O)[O-]	0.02	4	180	90	-1	5	7224	62.6995	493.902	1.14559	267.192	175.472	51.2387	819.748
C8TMG	Ser	CCCCCCCC[N+]=C(N(C)C)N(C)C.C(C(C(=O)[O-])N)O	0.02	4	180	90	-1	5	7242	62.7088	494.266	1.14542	267.152	175.883	51.231	819.845
Ch	Leu	C[N+](C)(C)CCO.CC(C)CC(C(=O)[O-])N	0.02	4	170	90	-1	5	6166	61.6645	475.957	1.1643	271.676	152.287	51.9941	820.129
N1111	ZnCl4	C[N+](C)(C)C.Cl[Zn-2](Cl)(Cl)Cl	0.08	4	190	90	-1	5	2368	75.9038	453.173	1.1875	220.71	190.052	42.4105	820.339
C8TMG	Gly	CCCCCCCC[N+]=C(N(C)C)N(C)C.C(C(=O)[O-])N	0.02	4	180	90	-1	5	7280	62.6966	495.285	1.14565	267.204	176.84	51.241	820.466
C2TMG	Leu	CC[N+]=C(N(C)C)N(C)C.CC(C)CC(C(=O)[O-])N	0.02	4	180	90	-1	5	7285	62.6929	495.436	1.14571	267.22	176.972	51.244	820.575
C4TMG	But	CCCC[N+]=C(N(C)C)N(C)C.CCCC(=O)[O-]	0.02	4	190	90	-1	5	5086	60.6747	456.826	1.18435	276.108	127.662	53.0554	820.59
Ch	Asp	C[N+](C)(C)CCO.C(C(C(=O)[O-])N)C(=O)O	0.02	4	190	90	-1	5	5125	60.6928	457.668	1.184	276.026	128.603	53.0396	820.835
TMG	ZnCl4	[N+]=C(N(C)C)N(C)C.Cl[Zn-2](Cl)(Cl)Cl	0.06	4	170	90	-1	5	3192	72.1368	478.854	1.16418	232.236	202.172	44.446	821.515
C6TMG	HCO3	CCCCCC[N+]=C(N(C)C)N(C)C.OC([O-])=O	0.02	4	170	90	-1	5	6184	61.5671	477.155	1.16614	272.106	152.973	52.0764	821.649
N2222	For	CC[N+](CC)(CC)CC.C(=O)[O-]	0.02	4	170	90	-1	5	6298	61.6704	479.172	1.16419	271.65	155.532	51.9892	821.681
C2TMG	MnCl3	CC[N+]=C(N(C)C)N(C)C.Cl[Mn-](Cl)Cl	0.02	4	190	120	-1	5	3564	67.135	402.285	1.24112	249.539	80.8505	71.8956	821.701
AMIM	ZnCl3	C[N+]1=CN(C=C1)CC=C.Cl[Zn-](Cl)Cl	0.04	4	180	90	-1	5	1852	62.994	406.491	1.23694	265.942	89.55	50.9991	821.717
Ch	ZnCl4	C[N+](C)(C)CCO.Cl[Zn-2](Cl)(Cl)Cl	0.02	4	170	150	-1	5	2102	74.9915	355.176	1.28882	223.396	42.6889	89.0913	821.998
C2TMG	Ala	CC[N+]=C(N(C)C)N(C)C.CC(C(=O)[O-])N	0.02	4	190	90	-1	5	5200	60.6762	459.676	1.18433	276.101	130.52	53.0541	822
N1111	ZnCl3	C[N+](C)(C)C.Cl[Zn-](Cl)Cl	0.06	4	180	120	-1	5	2044	76.8683	402.115	1.24191	217.941	121.492	62.6811	822.014
C4TMG	HCO3	CCCC[N+]=C(N(C)C)N(C)C.OC([O-])=O	0.02	4	190	90	-1	5	5227	60.6937	460.221	1.18398	276.021	131.16	53.0388	822.102
C4TMG	ZnCl4	CCCC[N+]=C(N(C)C)N(C)C.Cl[Zn-2](Cl)(Cl)Cl	0.04	4	180	120	-1	5	4814	76.3858	474.358	1.17001	219.318	191.963	63.0771	822.183
C6TMG	Lys	CCCCCC[N+]=C(N(C)C)N(C)C.C(CCN)CC(C(=O)[O-])N	0.02	4	190	90	-1	5	5164	60.6291	459.129	1.18525	276.316	129.718	53.0953	822.187
AMIM	ZnCl4	C[N+]1=CN(C=C1)CC=C.Cl[Zn-2](Cl)(Cl)Cl	0.04	4	180	90	-1	5	2047	63.3056	413.873	1.23086	264.633	98.4918	50.7481	822.365
C6TMG	Ac	CCCCCC[N+]=C(N(C)C)N(C)C.CC(=O)[O-]	0.02	4	170	90	-1	5	6260	61.5807	478.93	1.16589	272.046	154.819	52.0649	822.408
AMIM	ZnCl3	C[N+]1=CN(C=C1)CC=C.Cl[Zn-](Cl)Cl	0.02	4	180	120	-1	5	1852	65.4465	372.694	1.27249	255.977	43.0972	73.6204	822.592
C4TMG	ZnCl3	CCCC[N+]=C(N(C)C)N(C)C.Cl[Zn-](Cl)Cl	0.04	4	180	120	-1	5	4096	74.9959	453.988	1.19169	223.382	166.359	64.2461	822.839
N2222	Asp	CC[N+](CC)(CC)CC.C(C(C(=O)[O-])N)C(=O)O	0.02	4	180	90	-1	5	7540	62.7552	501.133	1.14458	266.954	182.985	51.1932	822.855
Ch	OH	C[N+](C)(C)CCO.[OH-]	0.02	4	180	120	-1	5	2579	66.0797	385.879	1.2603	253.524	59.4398	72.915	823.088
C6TMG	Asp	CCCCCC[N+]=C(N(C)C)N(C)C.C(C(C(=O)[O-])N)C(=O)O	0.02	4	180	90	-1	5	7522	62.7114	501.046	1.14538	267.141	182.676	51.2289	823.211
C4TMG	Ac	CCCC[N+]=C(N(C)C)N(C)C.CC(=O)[O-]	0.02	4	190	90	-1	5	5305	60.6841	462.251	1.18417	276.065	133.139	53.0472	823.212
C4TMG	ZnCl4	CCCC[N+]=C(N(C)C)N(C)C.Cl[Zn-2](Cl)(Cl)Cl	0.02	4	180	150	-1	5	4814	77.3885	397.68	1.24957	216.476	94.7379	86.4661	823.624
C6TMG	Gly	CCCCCC[N+]=C(N(C)C)N(C)C.C(C(=O)[O-])N	0.02	4	170	90	-1	5	6375	61.5918	481.687	1.16568	271.997	157.635	52.0555	823.682
C2TMG	Asp	CC[N+]=C(N(C)C)N(C)C.C(C(C(=O)[O-])N)C(=O)O	0.02	4	170	90	-1	5	6384	61.5904	481.921	1.1657	272.003	157.861	52.0567	823.812
DMIM	CoCl3	CN1C=C[N+](=C1)C.Cl[Co-](Cl)Cl	0.02	4	190	120	-1	5	5308	68.5742	432.575	1.21507	244.301	117.887	70.3867	823.821
C4TMG	MnCl3	CCCC[N+]=C(N(C)C)N(C)C.Cl[Mn-](Cl)Cl	0.04	4	190	90	-1	5	4284	67.3507	490.282	1.15741	248.74	193.746	47.7964	823.846
C8TMG	FeCl4	CCCCCCCC[N+]=C(N(C)C)N(C)C.Cl[Fe-](Cl)(Cl)Cl	0.02	4	190	120	-1	5	5745	68.9704	439.739	1.20809	242.898	126.859	69.9823	823.914
EMIM	CoCl3	CCN1C=C[N+](=C1)C.Cl[Co-](Cl)Cl	0.02	4	190	120	-1	5	5050	68.3278	428.384	1.21945	245.182	112.561	70.6405	823.917
C6TMG	Ser	CCCCCC[N+]=C(N(C)C)N(C)C.C(C(C(=O)[O-])N)O	0.02	4	170	90	-1	5	6422	61.6145	482.671	1.16525	271.897	158.738	52.0364	823.959
C8TMG	Ala	CCCCCCCC[N+]=C(N(C)C)N(C)C.CC(C(=O)[O-])N	0.02	4	180	90	-1	5	7576	62.6981	502.464	1.14562	267.198	184.026	51.2398	824.042
N2222	Ala	CC[N+](CC)(CC)CC.CC(C(=O)[O-])N	0.02	4	170	90	-1	5	6519	61.6756	484.588	1.16409	271.627	160.976	51.9848	824.34
C2TMG	MnCl3	CC[N+]=C(N(C)C)N(C)C.Cl[Mn-](Cl)Cl	0.04	4	190	90	-1	5	3564	65.9792	467.234	1.18147	253.91	164.534	48.79	824.351
C8TMG	For	CCCCCCCC[N+]=C(N(C)C)N(C)C.C(=O)[O-]	0.02	4	180	90	-1	5	7601	62.6813	503.205	1.14593	267.269	184.683	51.2535	824.566
DMIM	NiCl4	CN1C=C[N+](=C1)C.Cl[Ni-2](Cl)(Cl)Cl	0.02	4	180	90	-1	5	4682	59.9829	451.729	1.19748	279.293	118.877	53.5593	824.603
DEIM	CrCl4	CC[N]1C=C[N+](=C1)CC.Cl[Cr-](Cl)(Cl)Cl	0.02	4	190	90	-1	5	7096	62.2336	494.572	1.15469	269.192	173.653	51.7264	824.63
Ch	ZnCl4	C[N+](C)(C)CCO.Cl[Zn-2](Cl)(Cl)Cl	0.04	4	190	150	-1	5	2102	80.4423	371.165	1.27851	208.258	79.5925	83.3139	824.838
DEIM	CoCl3	CC[N]1C=C[N+](=C1)CC.Cl[Co-](Cl)Cl	0.02	4	190	120	-1	5	5047	68.2354	428.897	1.2211	245.514	112.646	70.7361	824.999
TMG	Arg	[N+]=C(N(C)C)N(C)C.C(CC(C(=O)[O-])N)CN=C(N)N	0.02	4	180	90	-1	5	7652	62.6838	504.425	1.14588	267.258	185.915	51.2515	825.153
C6TMG	FeCl4	CCCCCC[N+]=C(N(C)C)N(C)C.Cl[Fe-](Cl)(Cl)Cl	0.02	4	190	120	-1	5	5013	68.1678	428.563	1.22231	245.758	111.999	70.8063	825.437
C4TMG	Gly	CCCC[N+]=C(N(C)C)N(C)C.C(C(=O)[O-])N	0.02	4	190	90	-1	5	5491	60.6822	466.934	1.18421	276.074	137.811	53.0488	825.571
N1111	Arg	C[N+](C)(C)C.C(CC(C(=O)[O-])N)CN=C(N)N	0.02	4	180	90	-1	5	7781	62.7555	506.979	1.14457	266.953	188.833	51.1929	825.774
N2222	But	CC[N+](CC)(CC)CC.CCCC(=O)[O-]	0.02	4	190	90	-1	5	5497	60.6653	467.215	1.18454	276.151	138	53.0636	825.877
C4TMG	Leu	CCCC[N+]=C(N(C)C)N(C)C.CC(C)CC(C(=O)[O-])N	0.02	4	180	90	-1	5	7734	62.7036	506.257	1.14552	267.174	187.848	51.2353	825.888
Ch	ZnCl3	C[N+](C)(C)CCO.Cl[Zn-](Cl)Cl	0.1	4	190	90	-1	5	1880	78.9839	434.112	1.21832	212.104	181.252	40.7567	826.218
DMIM	ZnCl3	CN1C=C[N+](=C1)C.Cl[Zn-](Cl)Cl	0.06	4	190	120	-1	5	1706	75.5312	388.9	1.26446	221.799	103.197	63.9036	826.68
EMIM	ZnCl4	CCN1C=C[N+](=C1)C.Cl[Zn-2](Cl)(Cl)Cl	0.06	4	190	120	-1	5	1769	75.6847	391.915	1.2619	221.35	106.791	63.7739	826.905
C6TMG	For	CCCCCC[N+]=C(N(C)C)N(C)C.C(=O)[O-]	0.02	4	170	90	-1	5	6625	61.5795	487.966	1.16591	272.051	163.849	52.066	826.938
N1111	ZnCl3	C[N+](C)(C)C.Cl[Zn-](Cl)Cl	0.02	4	170	150	-1	5	2044	74.4673	356.49	1.29789	224.968	41.8032	89.7185	827.192
C2TMG	Arg	CC[N+]=C(N(C)C)N(C)C.C(CC(C(=O)[O-])N)CN=C(N)N	0.02	4	180	90	-1	5	7861	62.7184	509.221	1.14525	267.111	190.887	51.2232	827.235
C6TMG	ZnCl4	CCCCCC[N+]=C(N(C)C)N(C)C.Cl[Zn-2](Cl)(Cl)Cl	0.02	4	190	150	-1	5	5675	77.8707	412.191	1.2425	215.136	110.99	86.0652	827.346
AMIM	CoCl4	C[N+]1=CN(C=C1)CC=C.Cl[Co-2](Cl)(Cl)Cl	0.02	4	180	90	-1	5	4574	59.6754	451.301	1.20365	280.732	116.733	53.8352	827.475
C4TMG	Ser	CCCC[N+]=C(N(C)C)N(C)C.C(C(C(=O)[O-])N)O	0.02	4	190	90	-1	5	5639	60.6772	470.687	1.18431	276.097	141.537	53.0532	827.497
C4TMG	For	CCCC[N+]=C(N(C)C)N(C)C.C(=O)[O-]	0.02	4	190	90	-1	5	5655	60.69	470.989	1.18406	276.038	141.909	53.042	827.523
Ch	ZnCl3	C[N+](C)(C)CCO.Cl[Zn-](Cl)Cl	0.08	4	170	90	-1	5	1880	73.3585	428.195	1.22783	228.368	156.121	43.7058	828.013
N1111	ZnCl4	C[N+](C)(C)C.Cl[Zn-2](Cl)(Cl)Cl	0.06	4	190	120	-1	5	2368	77.231	419.504	1.23663	216.918	140.089	62.497	828.067
TMG	ZnCl4	[N+]=C(N(C)C)N(C)C.Cl[Zn-2](Cl)(Cl)Cl	0.08	4	190	90	-1	5	3192	78.216	503.955	1.1524	214.186	248.612	41.1568	828.178
C6TMG	Ala	CCCCCC[N+]=C(N(C)C)N(C)C.CC(C(=O)[O-])N	0.02	4	170	90	-1	5	6744	61.5916	490.813	1.16568	271.998	166.759	52.0557	828.246
N2222	HCO3	CC[N+](CC)(CC)CC.OC([O-])=O	0.02	4	190	90	-1	5	5725	60.6908	472.739	1.18404	276.035	143.663	53.0413	828.39
TMG	ZnCl3	[N+]=C(N(C)C)N(C)C.Cl[Zn-](Cl)Cl	0.02	4	170	150	-1	5	2717	74.9633	367.804	1.2893	223.48	55.1994	89.1247	828.554
C2TMG	ZnCl4	CC[N+]=C(N(C)C)N(C)C.Cl[Zn-2](Cl)(Cl)Cl	0.02	4	160	120	-1	5	3985	66.8585	413.159	1.24436	250.57	90.7748	71.8135	828.76
EMIM	NiCl4	CCN1C=C[N+](=C1)C.Cl[Ni-2](Cl)(Cl)Cl	0.02	4	180	90	-1	5	4386	59.404	448.542	1.20915	282.014	112.447	54.0811	828.844
TMG	ZnCl3	[N+]=C(N(C)C)N(C)C.Cl[Zn-](Cl)Cl	0.08	4	180	90	-1	5	2717	76.3717	478.15	1.17981	219.358	216.726	42.0658	828.978
EMIM	CoCl4	CCN1C=C[N+](=C1)C.Cl[Co-2](Cl)(Cl)Cl	0.04	4	190	120	-1	5	4435	75.0874	467.299	1.1908	223.11	179.908	64.2812	829.051
N1111	Asp	C[N+](C)(C)C.C(C(C(=O)[O-])N)C(=O)O	0.02	4	190	90	-1	5	5793	60.6873	474.473	1.18411	276.051	145.378	53.0444	829.291
Ch	HCO3	C[N+](C)(C)CCO.OC([O-])=O	0.04	4	180	90	-1	5	1984	62.6503	415.139	1.24373	267.401	96.459	51.2789	829.435
N1111	ZnCl4	C[N+](C)(C)C.Cl[Zn-2](Cl)(Cl)Cl	0.04	4	160	90	-1	5	2368	63.3048	429.121	1.22986	264.637	113.938	50.5458	829.492
DMIM	ZnCl4	CN1C=C[N+](=C1)C.Cl[Zn-2](Cl)(Cl)Cl	0.06	4	190	120	-1	5	1877	75.7387	398.15	1.261	221.192	113.23	63.7285	829.573
C4TMG	ZnCl3	CCCC[N+]=C(N(C)C)N(C)C.Cl[Zn-](Cl)Cl	0.06	4	180	90	-1	5	4096	73.9346	523.162	1.1363	226.589	253.121	43.4524	829.732
N2222	Ac	CC[N+](CC)(CC)CC.CC(=O)[O-]	0.02	4	190	90	-1	5	5825	60.679	475.341	1.18427	276.088	146.201	53.0516	829.806
N1111	ZnCl4	C[N+](C)(C)C.Cl[Zn-2](Cl)(Cl)Cl	0.06	4	170	90	-1	5	2368	69.1472	445.111	1.21451	242.277	156.467	46.3677	829.81
TMG	ZnCl4	[N+]=C(N(C)C)N(C)C.Cl[Zn-2](Cl)(Cl)Cl	0.06	4	190	120	-1	5	3192	79.3322	455.85	1.20388	211.173	183.835	60.8418	829.863
C8TMG	But	CCCCCCCC[N+]=C(N(C)C)N(C)C.CCCC(=O)[O-]	0.02	4	170	90	-1	5	6873	61.5818	494.081	1.16587	272.041	169.976	52.064	829.973
N1111	ZnCl3	C[N+](C)(C)C.Cl[Zn-](Cl)Cl	0.04	4	190	150	-1	5	2044	79.8315	371.792	1.28829	209.852	77.9885	83.9514	830.042
EMIM	CoCl4	CCN1C=C[N+](=C1)C.Cl[Co-2](Cl)(Cl)Cl	0.06	4	190	90	-1	5	4435	74.8612	537.463	1.12267	223.784	270.677	43.0012	830.065
C4TMG	Asp	CCCC[N+]=C(N(C)C)N(C)C.C(C(C(=O)[O-])N)C(=O)O	0.02	4	170	90	-1	5	6913	61.5999	494.925	1.16552	271.961	170.915	52.0487	830.224
N1111	OH	C[N+](C)(C)C.[OH-]	0.04	4	180	90	-1	5	3254	64.9121	460.268	1.20039	258.084	152.692	49.4921	830.331
Ch	Lys	C[N+](C)(C)CCO.C(CCN)CC(C(=O)[O-])N	0.04	4	180	90	-1	5	1993	62.5962	415.936	1.2448	267.632	96.9802	51.3232	830.37
Ch	Arg	C[N+](C)(C)CCO.C(CC(C(=O)[O-])N)CN=C(N)N	0.02	4	170	90	-1	5	6996	61.6644	496.457	1.1643	271.676	172.786	51.9942	830.38
C6TMG	OH	CCCCCC[N+]=C(N(C)C)N(C)C.[OH-]	0.02	4	170	90	-1	5	7371	62.0032	502.955	1.15794	270.192	181.053	51.7101	830.449
C6TMG	MnCl3	CCCCCC[N+]=C(N(C)C)N(C)C.Cl[Mn-](Cl)Cl	0.04	4	190	90	-1	5	5048	68.2149	518.184	1.14275	245.588	225.405	47.1909	830.465
DMIM	CoCl4	CN1C=C[N+](=C1)C.Cl[Co-2](Cl)(Cl)Cl	0.04	4	190	120	-1	5	4734	75.5031	476.789	1.18425	221.882	190.98	63.9273	830.518
N1111	Leu	C[N+](C)(C)C.CC(C)CC(C(=O)[O-])N	0.02	4	170	90	-1	5	6994	61.6515	496.511	1.16455	271.733	172.773	52.0051	830.529
Ch	Ac	C[N+](C)(C)CCO.CC(=O)[O-]	0.04	4	180	90	-1	5	2054	62.6538	418.519	1.24366	267.386	99.8567	51.276	831.09
C2TMG	ZnCl3	CC[N+]=C(N(C)C)N(C)C.Cl[Zn-](Cl)Cl	0.04	4	170	120	-1	5	3383	72.9068	437.092	1.22526	229.784	141.338	65.9711	831.177
C2TMG	ZnCl3	CC[N+]=C(N(C)C)N(C)C.Cl[Zn-](Cl)Cl	0.04	4	160	90	-1	5	3383	65.0347	465.245	1.19715	257.598	158.446	49.2013	831.196
C4TMG	Ala	CCCC[N+]=C(N(C)C)N(C)C.CC(C(=O)[O-])N	0.02	4	190	90	-1	5	5947	60.678	478.411	1.18429	276.093	149.266	53.0525	831.351
C4TMG	Arg	CCCC[N+]=C(N(C)C)N(C)C.C(CC(C(=O)[O-])N)CN=C(N)N	0.02	4	180	90	-1	5	8207	62.7194	517.615	1.14523	267.107	199.286	51.2224	831.422
N2222	MnCl3	CC[N+](CC)(CC)CC.Cl[Mn-](Cl)Cl	0.02	4	180	90	-1	5	4478	59.2981	451.706	1.21131	282.518	115.01	54.1777	831.506
TMG	Asp	[N+]=C(N(C)C)N(C)C.C(C(C(=O)[O-])N)C(=O)O	0.02	4	190	90	-1	5	5966	60.682	478.857	1.18421	276.075	149.733	53.049	831.535
C8TMG	Asp	CCCCCCCC[N+]=C(N(C)C)N(C)C.C(C(C(=O)[O-])N)C(=O)O	0.02	4	180	90	-1	5	8192	62.6971	517.434	1.14564	267.202	198.992	51.2406	831.536
C4TMG	FeCl4	CCCC[N+]=C(N(C)C)N(C)C.Cl[Fe-](Cl)(Cl)Cl	0.02	4	190	120	-1	5	4321	67.0253	420.144	1.24315	249.947	98.1837	72.0132	831.645
C2TMG	ZnCl3	CC[N+]=C(N(C)C)N(C)C.Cl[Zn-](Cl)Cl	0.02	4	160	120	-1	5	3383	66.0583	404.284	1.25943	253.606	77.9953	72.6834	831.859
C6TMG	But	CCCCCC[N+]=C(N(C)C)N(C)C.CCCC(=O)[O-]	0.02	4	190	90	-1	5	5969	60.6564	479.135	1.18471	276.192	149.872	53.0714	831.924
TMG	Leu	[N+]=C(N(C)C)N(C)C.CC(C)CC(C(=O)[O-])N	0.02	4	170	90	-1	5	6971	61.5268	496.949	1.16691	272.284	172.554	52.1105	831.928
N1111	ZnCl4	C[N+](C)(C)C.Cl[Zn-2](Cl)(Cl)Cl	0.02	4	160	120	-1	5	2368	65.1017	386.48	1.27794	257.332	55.3966	73.7515	832.211
N2222	Gly	CC[N+](CC)(CC)CC.C(C(=O)[O-])N	0.02	4	190	90	-1	5	6010	60.6717	480.042	1.18441	276.122	150.863	53.058	832.228
EMIM	ZnCl3	CCN1C=C[N+](=C1)C.Cl[Zn-](Cl)Cl	0.06	4	190	120	-1	5	1632	74.8219	388.068	1.27645	223.902	99.6567	64.5093	832.257
Ch	MnCl3	C[N+](C)(C)CCO.Cl[Mn-](Cl)Cl	0.04	4	190	90	-1	5	2028	62.5288	418.193	1.24666	267.921	98.7898	51.4822	832.428
N2222	ZnCl3	CC[N+](CC)(CC)CC.Cl[Zn-](Cl)Cl	0.02	4	160	120	-1	5	4258	66.8053	419.712	1.24535	250.77	97.0708	71.8707	832.532
C4TMG	ZnCl3	CCCC[N+]=C(N(C)C)N(C)C.Cl[Zn-](Cl)Cl	0.02	4	180	150	-1	5	4096	75.9032	391.056	1.27402	220.712	82.1853	88.1581	832.538
C6TMG	Leu	CCCCCC[N+]=C(N(C)C)N(C)C.CC(C)CC(C(=O)[O-])N	0.02	4	180	90	-1	5	8277	62.6929	519.534	1.14571	267.22	201.071	51.244	832.624
C8TMG	Lys	CCCCCCCC[N+]=C(N(C)C)N(C)C.C(CCN)CC(C(=O)[O-])N	0.02	4	190	90	-1	5	5988	60.6206	479.895	1.18541	276.355	150.437	53.1028	832.654
C2TMG	ZnCl3	CC[N+]=C(N(C)C)N(C)C.Cl[Zn-](Cl)Cl	0.06	4	170	90	-1	5	3383	71.6799	494.081	1.1716	233.717	215.635	44.7294	832.839
C6TMG	ZnCl4	CCCCCC[N+]=C(N(C)C)N(C)C.Cl[Zn-2](Cl)(Cl)Cl	0.04	4	190	120	-1	5	5675	76.9963	504.769	1.16128	217.579	224.502	62.6876	833.025
N1111	ZnCl4	C[N+](C)(C)C.Cl[Zn-2](Cl)(Cl)Cl	0.04	4	170	120	-1	5	2368	70.873	406.013	1.26042	236.377	101.771	67.8643	833.217
Ch	ZnCl3	C[N+](C)(C)CCO.Cl[Zn-](Cl)Cl	0.04	4	180	150	-1	5	1880	79.1535	368.533	1.29867	211.649	72.3455	84.538	833.601
N2222	Ser	CC[N+](CC)(CC)CC.C(C(C(=O)[O-])N)O	0.02	4	190	90	-1	5	6118	60.6683	482.781	1.18448	276.137	153.583	53.061	833.631
DMIM	ZnCl4	CN1C=C[N+](=C1)C.Cl[Zn-2](Cl)(Cl)Cl	0.04	4	190	150	-1	5	1877	79.1824	368.415	1.29885	211.572	72.2037	84.6395	833.634
C8TMG	HCO3	CCCCCCCC[N+]=C(N(C)C)N(C)C.OC([O-])=O	0.02	4	170	90	-1	5	7149	61.5587	501.095	1.1663	272.143	176.868	52.0835	833.699
DMIM	ZnCl3	CN1C=C[N+](=C1)C.Cl[Zn-](Cl)Cl	0.08	4	190	90	-1	5	1706	72.2682	420.167	1.24725	231.814	143.809	44.5441	833.706
TMG	ZnCl4	[N+]=C(N(C)C)N(C)C.Cl[Zn-2](Cl)(Cl)Cl	0.02	4	170	150	-1	5	3192	74.9127	377.709	1.29018	223.631	64.8935	89.185	833.942
N2222	CrCl4	CC[N+](CC)(CC)CC.Cl[Cr-](Cl)(Cl)Cl	0.02	4	190	90	-1	5	9313	63.545	537.499	1.13086	263.636	223.204	50.6589	834.178
TMG	ZnCl3	[N+]=C(N(C)C)N(C)C.Cl[Zn-](Cl)Cl	0.06	4	180	120	-1	5	2717	77.5884	438.013	1.23039	215.918	159.996	62.0994	834.2
C8TMG	Ser	CCCCCCCC[N+]=C(N(C)C)N(C)C.C(C(C(=O)[O-])N)O	0.02	4	170	90	-1	5	7242	61.6037	503.028	1.16545	271.944	179.038	52.0455	834.24
AMIM	CoCl3	C[N+]1=CN(C=C1)CC=C.Cl[Co-](Cl)Cl	0.02	4	190	120	-1	5	5132	67.552	435.153	1.23346	247.998	115.702	71.4518	834.304
C8TMG	Ac	CCCCCCCC[N+]=C(N(C)C)N(C)C.CC(=O)[O-]	0.02	4	170	90	-1	5	7224	61.5797	502.779	1.16591	272.05	178.663	52.0658	834.343
C6TMG	HCO3	CCCCCC[N+]=C(N(C)C)N(C)C.OC([O-])=O	0.02	4	190	90	-1	5	6184	60.6735	484.396	1.18438	276.113	155.226	53.0565	834.387
Ch	Leu	C[N+](C)(C)CCO.CC(C)CC(C(=O)[O-])N	0.02	4	190	90	-1	5	6166	60.6484	484.144	1.18487	276.228	154.838	53.0784	834.507
EMIM	MnCl3	CCN1C=C[N+](=C1)C.Cl[Mn-](Cl)Cl	0.06	4	190	90	-1	5	1767	67.1475	417.665	1.25164	249.492	120.232	47.941	834.65
N2222	Leu	CC[N+](CC)(CC)CC.CC(C)CC(C(=O)[O-])N	0.02	4	180	90	-1	5	8495	62.7329	524.495	1.14498	267.049	206.235	51.2113	834.739
EMIM	ZnCl3	CCN1C=C[N+](=C1)C.Cl[Zn-](Cl)Cl	0.08	4	190	90	-1	5	1632	71.8983	416.058	1.25366	233.006	138.279	44.7732	834.86
C2TMG	ZnCl4	CC[N+]=C(N(C)C)N(C)C.Cl[Zn-2](Cl)(Cl)Cl	0.04	4	170	120	-1	5	3985	73.6715	457.445	1.21254	227.398	164.76	65.2864	834.994
C8TMG	Gly	CCCCCCCC[N+]=C(N(C)C)N(C)C.C(C(=O)[O-])N	0.02	4	170	90	-1	5	7280	61.578	504.178	1.16594	272.058	180.053	52.0672	835.058
C2TMG	Leu	CC[N+]=C(N(C)C)N(C)C.CC(C)CC(C(=O)[O-])N	0.02	4	170	90	-1	5	7285	61.5824	504.266	1.16585	272.039	180.164	52.0635	835.06
TMG	MnCl3	[N+]=C(N(C)C)N(C)C.Cl[Mn-](Cl)Cl	0.02	4	180	90	-1	5	2892	57.5844	423.202	1.24735	290.925	76.4869	55.79	835.278
N2222	ZnCl4	CC[N+](CC)(CC)CC.Cl[Zn-2](Cl)(Cl)Cl	0.02	4	160	120	-1	5	5149	67.3979	436.155	1.2344	248.565	116.351	71.2388	835.279
N2222	ZnCl4	CC[N+](CC)(CC)CC.Cl[Zn-2](Cl)(Cl)Cl	0.06	4	180	90	-1	5	5149	76.3199	569.85	1.10079	219.507	308.248	42.0944	835.319
C6TMG	Ac	CCCCCC[N+]=C(N(C)C)N(C)C.CC(=O)[O-]	0.02	4	190	90	-1	5	6260	60.6638	486.381	1.18457	276.158	157.159	53.0649	835.475
N1111	Lys	C[N+](C)(C)C.C(CCN)CC(C(=O)[O-])N	0.04	4	180	90	-1	5	2193	62.5771	425.798	1.24518	267.714	106.745	51.3389	835.491
Ch	But	C[N+](C)(C)CCO.CCCC(=O)[O-]	0.04	4	180	90	-1	5	2235	62.6332	427.459	1.24407	267.474	108.692	51.2929	835.764
N2222	OH	CC[N+](CC)(CC)CC.[OH-]	0.02	4	170	90	-1	5	7333	61.5731	505.529	1.16603	272.079	181.378	52.0713	835.779
N2222	For	CC[N+](CC)(CC)CC.C(=O)[O-]	0.02	4	190	90	-1	5	6298	60.6757	487.24	1.18434	276.104	158.082	53.0545	835.788
TMG	OH	[N+]=C(N(C)C)N(C)C.[OH-]	0.02	4	190	120	-1	5	4352	66.7157	422.801	1.24892	251.107	99.347	72.3474	835.858
TMG	MnCl3	[N+]=C(N(C)C)N(C)C.Cl[Mn-](Cl)Cl	0.04	4	190	90	-1	5	2892	63.8326	450.879	1.2212	262.448	138	50.4307	836.039
Ch	For	C[N+](C)(C)CCO.C(=O)[O-]	0.04	4	180	90	-1	5	2256	62.6484	428.376	1.24377	267.409	109.686	51.2804	836.072
EMIM	ZnCl4	CCN1C=C[N+](=C1)C.Cl[Zn-2](Cl)(Cl)Cl	0.04	4	190	150	-1	5	1769	78.7388	366.313	1.30617	212.764	68.4326	85.1164	836.242
N1111	OH	C[N+](C)(C)C.[OH-]	0.02	4	180	120	-1	5	3254	65.6248	404.218	1.26903	255.281	75.5168	73.4203	836.625
C8TMG	ZnCl3	CCCCCCCC[N+]=C(N(C)C)N(C)C.Cl[Zn-](Cl)Cl	0.04	4	170	90	-1	5	5644	68.7412	540.438	1.13306	243.708	250.089	46.6415	836.749
C2TMG	CoCl3	CC[N+]=C(N(C)C)N(C)C.Cl[Co-](Cl)Cl	0.02	4	180	90	-1	5	6482	60.7443	491.196	1.18247	275.792	162.517	52.8879	836.832
C2TMG	Asp	CC[N+]=C(N(C)C)N(C)C.C(C(C(=O)[O-])N)C(=O)O	0.02	4	190	90	-1	5	6384	60.678	489.38	1.18429	276.093	160.234	53.0525	836.835
C6TMG	Gly	CCCCCC[N+]=C(N(C)C)N(C)C.C(C(=O)[O-])N	0.02	4	190	90	-1	5	6375	60.6651	489.258	1.18454	276.152	160.043	53.0638	836.901
C6TMG	Arg	CCCCCC[N+]=C(N(C)C)N(C)C.C(CC(C(=O)[O-])N)CN=C(N)N	0.02	4	180	90	-1	5	8651	62.711	528.467	1.14538	267.143	210.095	51.2293	836.925
DEIM	ZnCl4	CC[N]1C=C[N+](=C1)CC.Cl[Zn-2](Cl)(Cl)Cl	0.06	4	190	120	-1	5	1966	75.3054	405.841	1.26825	222.465	119.281	64.0952	837.046
C6TMG	CoCl3	CCCCCC[N+]=C(N(C)C)N(C)C.Cl[Co-](Cl)Cl	0.02	4	190	120	-1	5	7501	69.4842	474.976	1.19915	241.102	164.409	69.4648	837.065
TMG	CrCl4	[N+]=C(N(C)C)N(C)C.Cl[Cr-](Cl)(Cl)Cl	0.02	4	190	90	-1	5	8146	62.2567	520.074	1.15426	269.092	199.275	51.7073	837.167
C6TMG	ZnCl3	CCCCCC[N+]=C(N(C)C)N(C)C.Cl[Zn-](Cl)Cl	0.04	4	190	120	-1	5	4853	75.116	484.072	1.19035	223.025	196.789	64.2567	837.21
N2222	Asp	CC[N+](CC)(CC)CC.C(C(C(=O)[O-])N)C(=O)O	0.02	4	170	90	-1	5	7540	61.6543	509.976	1.16449	271.721	186.253	52.0028	837.236
C4TMG	ZnCl4	CCCC[N+]=C(N(C)C)N(C)C.Cl[Zn-2](Cl)(Cl)Cl	0.06	4	180	90	-1	5	4814	75.228	557.775	1.11677	222.693	292.376	42.7054	837.27
N1111	HCO3	C[N+](C)(C)C.OC([O-])=O	0.04	4	180	90	-1	5	2307	62.6361	430.941	1.24401	267.462	112.188	51.2905	837.476
DEIM	MnCl3	CC[N]1C=C[N+](=C1)CC.Cl[Mn-](Cl)Cl	0.06	4	190	90	-1	5	1924	67.345	427.092	1.24797	248.76	130.531	47.8004	837.529
EMIM	CrCl4	CCN1C=C[N+](=C1)C.Cl[Cr-](Cl)(Cl)Cl	0.02	4	190	90	-1	5	7193	61.3628	503.998	1.17107	273.012	178.525	52.4605	837.536
C6TMG	Ser	CCCCCC[N+]=C(N(C)C)N(C)C.C(C(C(=O)[O-])N)O	0.02	4	190	90	-1	5	6422	60.6573	490.501	1.18469	276.187	161.243	53.0706	837.598
DMIM	CoCl4	CN1C=C[N+](=C1)C.Cl[Co-2](Cl)(Cl)Cl	0.06	4	190	90	-1	5	4734	74.9804	554.829	1.12088	223.429	288.467	42.9329	837.856
C6TMG	Asp	CCCCCC[N+]=C(N(C)C)N(C)C.C(C(C(=O)[O-])N)C(=O)O	0.02	4	170	90	-1	5	7522	61.5869	510.089	1.16577	272.019	186.011	52.0597	837.929
C2TMG	ZnCl4	CC[N+]=C(N(C)C)N(C)C.Cl[Zn-2](Cl)(Cl)Cl	0.04	4	160	90	-1	5	3985	65.6007	489.183	1.18682	255.375	185.031	48.7767	838.001
Ch	ZnCl3	C[N+](C)(C)CCO.Cl[Zn-](Cl)Cl	0.06	4	160	90	-1	5	1880	67.0952	425.398	1.25118	249.687	128.021	47.6902	838.288
C8TMG	CoCl3	CCCCCCCC[N+]=C(N(C)C)N(C)C.Cl[Co-](Cl)Cl	0.02	4	190	120	-1	5	8116	69.9314	485.333	1.19149	239.56	176.752	69.0206	838.41
DMIM	MnCl3	CN1C=C[N+](=C1)C.Cl[Mn-](Cl)Cl	0.06	4	190	90	-1	5	1851	67.0617	423.923	1.25324	249.811	126.109	48.0024	838.58
C8TMG	Ala	CCCCCCCC[N+]=C(N(C)C)N(C)C.CC(C(=O)[O-])N	0.02	4	170	90	-1	5	7576	61.5871	511.423	1.16577	272.018	187.346	52.0596	838.595
EMIM	ZnCl4	CCN1C=C[N+](=C1)C.Cl[Zn-2](Cl)(Cl)Cl	0.08	4	190	90	-1	5	1769	72.0745	426.621	1.2506	232.437	149.52	44.6638	838.609
C8TMG	CrCl4	CCCCCCCC[N+]=C(N(C)C)N(C)C.Cl[Cr-](Cl)(Cl)Cl	0.02	4	180	90	-1	5	9460	63.313	542.903	1.13449	264.602	227.558	50.7422	838.698
N2222	Ala	CC[N+](CC)(CC)CC.CC(C(=O)[O-])N	0.02	4	190	90	-1	5	6519	60.6652	492.872	1.18454	276.151	163.657	53.0637	838.706
TMG	MnCl3	[N+]=C(N(C)C)N(C)C.Cl[Mn-](Cl)Cl	0.02	4	190	120	-1	5	2892	65.1396	398.896	1.27914	257.183	67.6157	74.098	839.016
C8TMG	For	CCCCCCCC[N+]=C(N(C)C)N(C)C.C(=O)[O-]	0.02	4	170	90	-1	5	7601	61.5599	512.267	1.16628	272.138	188.047	52.0825	839.273
DEIM	CoCl4	CC[N]1C=C[N+](=C1)CC.Cl[Co-2](Cl)(Cl)Cl	0.06	4	190	90	-1	5	4469	74.1252	544.895	1.13381	226.006	275.461	43.4282	839.355
N1111	Ac	C[N+](C)(C)C.CC(=O)[O-]	0.04	4	180	90	-1	5	2398	62.6462	435.296	1.24381	267.419	116.595	51.2822	839.554
N2222	Arg	CC[N+](CC)(CC)CC.C(CC(C(=O)[O-])N)CN=C(N)N	0.02	4	180	90	-1	5	8924	62.7586	534.691	1.14451	266.94	216.561	51.1904	839.602
TMG	ZnCl3	[N+]=C(N(C)C)N(C)C.Cl[Zn-](Cl)Cl	0.04	4	190	150	-1	5	2717	80.1423	395.928	1.2833	209.038	103.265	83.6257	839.612
C8TMG	NiCl4	CCCCCCCC[N+]=C(N(C)C)N(C)C.Cl[Ni-2](Cl)(Cl)Cl	0.02	4	190	90	-1	5	8296	62.2054	524.175	1.15521	269.314	203.112	51.7499	839.694
Ch	ZnCl3	C[N+](C)(C)CCO.Cl[Zn-](Cl)Cl	0.06	4	170	120	-1	5	1880	74.7726	403.251	1.27616	224.05	114.876	64.3249	839.705
DMIM	ZnCl3	CN1C=C[N+](=C1)C.Cl[Zn-](Cl)Cl	0.04	4	190	150	-1	5	1706	78.2706	366.053	1.31398	214.037	66.3903	85.6255	840.018
C6TMG	For	CCCCCC[N+]=C(N(C)C)N(C)C.C(=O)[O-]	0.02	4	190	90	-1	5	6625	60.662	495.56	1.1846	276.166	166.327	53.0665	840.082
TMG	Arg	[N+]=C(N(C)C)N(C)C.C(CC(C(=O)[O-])N)CN=C(N)N	0.02	4	170	90	-1	5	7652	61.5463	513.643	1.16654	272.198	189.351	52.094	840.09
N1111	Arg	C[N+](C)(C)C.C(CC(C(=O)[O-])N)CN=C(N)N	0.02	4	170	90	-1	5	7781	61.6588	515.892	1.16441	271.701	192.192	51.999	840.151
C8TMG	Leu	CCCCCCCC[N+]=C(N(C)C)N(C)C.CC(C)CC(C(=O)[O-])N	0.02	4	180	90	-1	5	8891	62.6863	534.507	1.14584	267.248	216.009	51.2495	840.171
C6TMG	ZnCl3	CCCCCC[N+]=C(N(C)C)N(C)C.Cl[Zn-](Cl)Cl	0.02	4	190	150	-1	5	4853	75.9366	406.204	1.27415	220.615	97.3314	88.2573	840.175
Ch	HCO3	C[N+](C)(C)CCO.OC([O-])=O	0.04	4	170	90	-1	5	1984	61.821	420.604	1.2599	270.988	97.7529	51.8625	840.25
C4TMG	CoCl3	CCCC[N+]=C(N(C)C)N(C)C.Cl[Co-](Cl)Cl	0.02	4	190	120	-1	5	6951	68.7063	468.163	1.21273	243.832	154.08	70.2514	840.448
C4TMG	Leu	CCCC[N+]=C(N(C)C)N(C)C.CC(C)CC(C(=O)[O-])N	0.02	4	170	90	-1	5	7734	61.5924	515.286	1.16567	271.994	191.237	52.0551	840.476
DEIM	CoCl4	CC[N]1C=C[N+](=C1)CC.Cl[Co-2](Cl)(Cl)Cl	0.04	4	190	120	-1	5	4469	74.1179	474.809	1.20638	226.029	183.659	65.1221	840.594
Ch	ZnCl4	C[N+](C)(C)CCO.Cl[Zn-2](Cl)(Cl)Cl	0.1	4	190	90	-1	5	2102	78.62	457.624	1.22396	213.085	203.593	40.9453	840.794
Ch	Lys	C[N+](C)(C)CCO.C(CCN)CC(C(=O)[O-])N	0.04	4	170	90	-1	5	1993	61.7851	421.292	1.26063	271.146	98.2534	51.8927	840.96
DEIM	CoCl3	CC[N]1C=C[N+](=C1)CC.Cl[Co-](Cl)Cl	0.04	4	190	90	-1	5	5047	67.3577	524.734	1.15729	248.714	228.229	47.7914	841.011
C2TMG	FeCl4	CC[N+]=C(N(C)C)N(C)C.Cl[Fe-](Cl)(Cl)Cl	0.02	4	180	90	-1	5	3681	57.8967	441.675	1.24063	289.356	96.8292	55.4892	841.151
Ch	ZnCl3	C[N+](C)(C)CCO.Cl[Zn-](Cl)Cl	0.08	4	190	120	-1	5	1880	80.0143	412.83	1.26975	209.372	143.134	60.3231	841.289
C6TMG	Ala	CCCCCC[N+]=C(N(C)C)N(C)C.CC(C(=O)[O-])N	0.02	4	190	90	-1	5	6744	60.6546	498.608	1.18475	276.2	169.335	53.073	841.678
Ch	Ac	C[N+](C)(C)CCO.CC(=O)[O-]	0.04	4	170	90	-1	5	2054	61.8409	423.917	1.25949	270.901	101.169	51.8459	841.704
C8TMG	MnCl3	CCCCCCCC[N+]=C(N(C)C)N(C)C.Cl[Mn-](Cl)Cl	0.04	4	190	90	-1	5	5846	68.7346	549.629	1.13411	243.731	259.064	46.834	841.867
C2TMG	Arg	CC[N+]=C(N(C)C)N(C)C.C(CC(C(=O)[O-])N)CN=C(N)N	0.02	4	170	90	-1	5	7861	61.5952	518.403	1.16561	271.982	194.368	52.0527	842.007
TMG	OH	[N+]=C(N(C)C)N(C)C.[OH-]	0.04	4	190	90	-1	5	4352	66.0197	503.303	1.18074	253.754	200.789	48.76	842.023
N2222	ZnCl3	CC[N+](CC)(CC)CC.Cl[Zn-](Cl)Cl	0.04	4	170	120	-1	5	4258	73.5459	469.532	1.21461	227.787	176.348	65.3978	842.073
C8TMG	OH	CCCCCCCC[N+]=C(N(C)C)N(C)C.[OH-]	0.02	4	170	90	-1	5	8374	62.0465	527.224	1.15713	270.004	205.546	51.6741	842.179
Ch	Pro	C[N+](C)(C)CCO.CCC(=O)[O-]	0.02	4	180	90	-1	5	9184	62.7891	540.738	1.14396	266.81	222.762	51.1656	842.349
Ch	ZnCl4	C[N+](C)(C)CCO.Cl[Zn-2](Cl)(Cl)Cl	0.04	4	180	150	-1	5	2102	78.7194	379.155	1.30583	212.816	81.3345	85.0042	842.492
C2TMG	ZnCl4	CC[N+]=C(N(C)C)N(C)C.Cl[Zn-2](Cl)(Cl)Cl	0.02	4	170	150	-1	5	3985	74.8141	394.35	1.29188	223.925	81.1221	89.3026	843.113
DMIM	CoCl4	CN1C=C[N+](=C1)C.Cl[Co-2](Cl)(Cl)Cl	0.02	4	190	150	-1	5	4734	75.5541	405.862	1.2806	221.732	95.4255	88.7042	843.23
N2222	ZnCl3	CC[N+](CC)(CC)CC.Cl[Zn-](Cl)Cl	0.04	4	160	90	-1	5	4258	65.6833	501.227	1.18533	255.054	197.458	48.7154	843.277
C4TMG	Asp	CCCC[N+]=C(N(C)C)N(C)C.C(C(C(=O)[O-])N)C(=O)O	0.02	4	190	90	-1	5	6913	60.6885	502.57	1.18409	276.045	173.482	53.0433	843.328
C8TMG	Arg	CCCCCCCC[N+]=C(N(C)C)N(C)C.C(CC(C(=O)[O-])N)CN=C(N)N	0.02	4	180	90	-1	5	9173	62.7023	541.22	1.14554	267.18	222.804	51.2364	843.381
C8TMG	But	CCCCCCCC[N+]=C(N(C)C)N(C)C.CCCC(=O)[O-]	0.02	4	190	90	-1	5	6873	60.6419	501.953	1.185	276.258	172.611	53.0841	843.475
N1111	But	C[N+](C)(C)C.CCCC(=O)[O-]	0.04	4	180	90	-1	5	2553	62.6297	442.949	1.24414	267.489	124.164	51.2958	843.544
N2222	MnCl3	CC[N+](CC)(CC)CC.Cl[Mn-](Cl)Cl	0.02	4	190	120	-1	5	4478	66.2203	428.862	1.25826	252.986	102.988	72.8887	843.561
DMIM	NiCl4	CN1C=C[N+](=C1)C.Cl[Ni-2](Cl)(Cl)Cl	0.04	4	190	120	-1	5	4682	74.2406	482.763	1.20438	225.655	192.094	65.0144	843.574
C4TMG	FeCl4	CCCC[N+]=C(N(C)C)N(C)C.Cl[Fe-](Cl)(Cl)Cl	0.04	4	190	90	-1	5	4321	65.8329	503.297	1.18409	254.474	199.924	48.8984	843.696
C6TMG	FeCl4	CCCCCC[N+]=C(N(C)C)N(C)C.Cl[Fe-](Cl)(Cl)Cl	0.04	4	190	90	-1	5	5013	67.0727	525.419	1.16221	249.77	227.654	47.9945	843.813
EMIM	CoCl3	CCN1C=C[N+](=C1)C.Cl[Co-](Cl)Cl	0.04	4	190	90	-1	5	5050	67.1258	526.683	1.16129	249.573	229.153	47.9565	843.985
Ch	Gly	C[N+](C)(C)CCO.C(C(=O)[O-])N	0.04	4	180	90	-1	5	2584	62.6499	444.313	1.24374	267.403	125.631	51.2792	844.025
AMIM	CrCl4	C[N+]1=CN(C=C1)CC=C.Cl[Cr-](Cl)(Cl)Cl	0.02	4	190	90	-1	5	7187	60.8809	507.837	1.18034	275.173	179.788	52.8757	844.09
TMG	OH	[N+]=C(N(C)C)N(C)C.[OH-]	0.02	4	180	120	-1	5	4352	66.0305	427.06	1.26124	253.713	100.378	72.9693	844.148
Ch	Arg	C[N+](C)(C)CCO.C(CC(C(=O)[O-])N)CN=C(N)N	0.02	4	190	90	-1	5	6996	60.6938	504.609	1.18398	276.021	175.549	53.0387	844.295
AMIM	ZnCl4	C[N+]1=CN(C=C1)CC=C.Cl[Zn-2](Cl)(Cl)Cl	0.06	4	190	120	-1	5	2047	74.8713	413.137	1.2756	223.754	124.916	64.4667	844.37
C6TMG	ZnCl4	CCCCCC[N+]=C(N(C)C)N(C)C.Cl[Zn-2](Cl)(Cl)Cl	0.02	4	180	150	-1	5	5675	76.2596	420.762	1.26807	219.681	113.335	87.746	844.414
C2TMG	ZnCl4	CC[N+]=C(N(C)C)N(C)C.Cl[Zn-2](Cl)(Cl)Cl	0.06	4	170	90	-1	5	3985	72.3005	527.883	1.16154	231.71	251.827	44.3454	844.711
C2TMG	FeCl4	CC[N+]=C(N(C)C)N(C)C.Cl[Fe-](Cl)(Cl)Cl	0.02	4	190	120	-1	5	3681	65.4065	415.64	1.27392	256.133	85.7115	73.7956	844.778
TMG	Leu	[N+]=C(N(C)C)N(C)C.CC(C)CC(C(=O)[O-])N	0.02	4	190	90	-1	5	6971	60.6328	504.489	1.18517	276.299	175.098	53.0921	844.831
DMIM	ZnCl3	CN1C=C[N+](=C1)C.Cl[Zn-](Cl)Cl	0.04	4	180	120	-1	5	1706	68.7231	389.496	1.30046	243.772	75.6136	70.1102	844.979
Ch	MnCl3	C[N+](C)(C)CCO.Cl[Mn-](Cl)Cl	0.02	4	190	120	-1	5	2028	63.8942	386.077	1.30407	262.196	48.3393	75.5422	845.072
Ch	ZnCl3	C[N+](C)(C)CCO.Cl[Zn-](Cl)Cl	0.1	4	180	90	-1	5	1880	77.1918	444.107	1.24619	217.028	185.46	41.6189	845.149
N1111	Leu	C[N+](C)(C)C.CC(C)CC(C(=O)[O-])N	0.02	4	190	90	-1	5	6994	60.63	505.09	1.18523	276.312	175.684	53.0945	845.159
N1111	ZnCl3	C[N+](C)(C)C.Cl[Zn-](Cl)Cl	0.1	4	190	90	-1	5	2044	77.9469	455.91	1.23453	214.925	199.685	41.2989	845.222
DEIM	ZnCl3	CC[N]1C=C[N+](=C1)CC.Cl[Zn-](Cl)Cl	0.06	4	190	120	-1	5	1790	74.0967	401.609	1.28894	226.093	110.375	65.1407	845.274
DEIM	NiCl4	CC[N]1C=C[N+](=C1)CC.Cl[Ni-2](Cl)(Cl)Cl	0.02	4	180	90	-1	5	4423	58.2668	458.264	1.23275	287.518	115.609	55.1367	845.505
C8TMG	ZnCl4	CCCCCCCC[N+]=C(N(C)C)N(C)C.Cl[Zn-2](Cl)(Cl)Cl	0.04	4	170	90	-1	5	6559	69.6682	573.252	1.11799	240.465	286.766	46.0209	845.619
Ch	MnCl3	C[N+](C)(C)CCO.Cl[Mn-](Cl)Cl	0.02	4	180	90	-1	5	2028	56.0929	410.997	1.28052	298.661	55.0623	57.2735	845.759
N1111	Lys	C[N+](C)(C)C.C(CCN)CC(C(=O)[O-])N	0.04	4	170	90	-1	5	2193	61.7637	431.301	1.26106	271.24	108.151	51.9106	846.182
C4TMG	Arg	CCCC[N+]=C(N(C)C)N(C)C.C(CC(C(=O)[O-])N)CN=C(N)N	0.02	4	170	90	-1	5	8207	61.5964	526.947	1.16559	271.976	202.919	52.0516	846.268
C2TMG	ZnCl3	CC[N+]=C(N(C)C)N(C)C.Cl[Zn-](Cl)Cl	0.08	4	190	90	-1	5	3383	77.2261	525.481	1.16717	216.931	266.865	41.6844	846.326
C8TMG	Asp	CCCCCCCC[N+]=C(N(C)C)N(C)C.C(C(C(=O)[O-])N)C(=O)O	0.02	4	170	90	-1	5	8192	61.5728	526.778	1.16604	272.081	202.626	52.0716	846.407
Ch	ZnCl4	C[N+](C)(C)CCO.Cl[Zn-2](Cl)(Cl)Cl	0.08	4	170	90	-1	5	2102	72.5628	451.529	1.2413	230.873	176.471	44.1851	846.412
Ch	But	C[N+](C)(C)CCO.CCCC(=O)[O-]	0.04	4	170	90	-1	5	2235	61.8219	432.964	1.25988	270.984	110.118	51.8618	846.421
DEIM	ZnCl3	CC[N]1C=C[N+](=C1)CC.Cl[Zn-](Cl)Cl	0.08	4	190	90	-1	5	1790	71.4771	431.976	1.26105	234.379	152.56	45.0371	846.512
Ch	For	C[N+](C)(C)CCO.C(=O)[O-]	0.04	4	170	90	-1	5	2256	61.8368	433.895	1.25957	270.919	111.126	51.8493	846.734
C8TMG	HCO3	CCCCCCCC[N+]=C(N(C)C)N(C)C.OC([O-])=O	0.02	4	190	90	-1	5	7149	60.6563	508.763	1.18471	276.192	179.499	53.0715	846.738
N1111	For	C[N+](C)(C)C.C(=O)[O-]	0.04	4	180	90	-1	5	2691	62.6415	449.576	1.24391	267.439	130.851	51.2861	846.741
TMG	ZnCl4	[N+]=C(N(C)C)N(C)C.Cl[Zn-2](Cl)(Cl)Cl	0.04	4	190	150	-1	5	3192	80.318	413.076	1.28049	208.58	121.053	83.4428	846.782
AMIM	CoCl4	C[N+]1=CN(C=C1)CC=C.Cl[Co-2](Cl)(Cl)Cl	0.04	4	190	120	-1	5	4574	73.7526	481.498	1.21235	227.148	188.905	65.4446	846.926
C2TMG	ZnCl3	CC[N+]=C(N(C)C)N(C)C.Cl[Zn-](Cl)Cl	0.06	4	190	120	-1	5	3383	78.2197	473.49	1.221	214.176	197.607	61.7071	847.245
C2TMG	ZnCl3	CC[N+]=C(N(C)C)N(C)C.Cl[Zn-](Cl)Cl	0.02	4	170	150	-1	5	3383	73.9058	386.791	1.30775	226.677	69.7136	90.4001	847.273
C6TMG	Leu	CCCCCC[N+]=C(N(C)C)N(C)C.CC(C)CC(C(=O)[O-])N	0.02	4	170	90	-1	5	8277	61.5823	528.799	1.16586	272.039	204.697	52.0636	847.328
DEIM	ZnCl4	CC[N]1C=C[N+](=C1)CC.Cl[Zn-2](Cl)(Cl)Cl	0.08	4	190	90	-1	5	1966	72.0336	443.524	1.25131	232.569	166.266	44.6892	847.415
DEIM	ZnCl4	CC[N]1C=C[N+](=C1)CC.Cl[Zn-2](Cl)(Cl)Cl	0.04	4	190	150	-1	5	1966	78.0413	377.276	1.31785	214.666	76.7332	85.8771	847.561
C6TMG	CrCl4	CCCCCC[N+]=C(N(C)C)N(C)C.Cl[Cr-](Cl)(Cl)Cl	0.02	4	180	90	-1	5	8986	62.2201	540.836	1.15442	269.25	219.953	51.6334	847.628
DMIM	ZnCl4	CN1C=C[N+](=C1)C.Cl[Zn-2](Cl)(Cl)Cl	0.08	4	190	90	-1	5	1877	71.693	438.068	1.25725	233.674	159.493	44.9015	847.66
C8TMG	Ac	CCCCCCCC[N+]=C(N(C)C)N(C)C.CC(=O)[O-]	0.02	4	190	90	-1	5	7224	60.6518	510.684	1.1848	276.212	181.396	53.0754	847.743
EMIM	ZnCl4	CCN1C=C[N+](=C1)C.Cl[Zn-2](Cl)(Cl)Cl	0.04	4	180	120	-1	5	1769	68.6028	392.976	1.30274	244.199	78.5434	70.2332	847.86
Ch	CrCl4	C[N+](C)(C)CCO.Cl[Cr-](Cl)(Cl)Cl	0.02	4	190	90	-1	5	7553	60.9358	516.526	1.17928	274.925	188.773	52.8281	847.903
EMIM	CoCl4	CCN1C=C[N+](=C1)C.Cl[Co-2](Cl)(Cl)Cl	0.02	4	190	150	-1	5	4435	74.8686	403.496	1.29232	223.762	90.2169	89.5163	847.909
C8TMG	Ser	CCCCCCCC[N+]=C(N(C)C)N(C)C.C(C(C(=O)[O-])N)O	0.02	4	190	90	-1	5	7242	60.6471	511.176	1.1849	276.234	181.862	53.0796	848.035
N1111	ZnCl4	C[N+](C)(C)C.Cl[Zn-2](Cl)(Cl)Cl	0.08	4	180	90	-1	5	2368	73.4005	468.54	1.22756	228.238	196.533	43.7686	848.052
N1111	ZnCl3	C[N+](C)(C)C.Cl[Zn-](Cl)Cl	0.04	4	180	150	-1	5	2044	78.0904	379.947	1.31635	214.531	79.7274	85.6889	848.148
EMIM	NiCl4	CCN1C=C[N+](=C1)C.Cl[Ni-2](Cl)(Cl)Cl	0.06	4	190	90	-1	5	4386	73.1281	547.139	1.14927	229.088	274.031	44.0203	848.207
DMIM	NiCl4	CN1C=C[N+](=C1)C.Cl[Ni-2](Cl)(Cl)Cl	0.06	4	190	90	-1	5	4682	73.9249	559.536	1.13689	226.619	289.372	43.5458	848.211
N2222	ZnCl3	CC[N+](CC)(CC)CC.Cl[Zn-](Cl)Cl	0.02	4	170	150	-1	5	4258	74.5995	401.058	1.29559	224.569	86.9288	89.5594	848.325
N1111	HCO3	C[N+](C)(C)C.OC([O-])=O	0.04	4	170	90	-1	5	2307	61.802	436.653	1.26028	271.072	113.702	51.8785	848.468
C8TMG	Gly	CCCCCCCC[N+]=C(N(C)C)N(C)C.C(C(=O)[O-])N	0.02	4	190	90	-1	5	7280	60.6468	512.132	1.1849	276.235	182.817	53.0798	848.516
C2TMG	Leu	CC[N+]=C(N(C)C)N(C)C.CC(C)CC(C(=O)[O-])N	0.02	4	190	90	-1	5	7285	60.6415	512.303	1.185	276.259	182.959	53.0845	848.653
TMG	ZnCl4	[N+]=C(N(C)C)N(C)C.Cl[Zn-2](Cl)(Cl)Cl	0.06	4	180	120	-1	5	3192	77.5263	466.358	1.23137	216.091	188.117	62.1491	848.865
C6TMG	NiCl4	CCCCCC[N+]=C(N(C)C)N(C)C.Cl[Ni-2](Cl)(Cl)Cl	0.02	4	190	90	-1	5	7565	60.8646	517.431	1.18066	275.246	189.295	52.8899	849.045
N2222	Leu	CC[N+](CC)(CC)CC.CC(C)CC(C(=O)[O-])N	0.02	4	170	90	-1	5	8495	61.647	533.63	1.16463	271.753	209.868	52.0089	849.131
AMIM	CoCl4	C[N+]1=CN(C=C1)CC=C.Cl[Co-2](Cl)(Cl)Cl	0.06	4	190	90	-1	5	4574	73.5535	555.653	1.14263	227.763	284.124	43.7657	849.14
TMG	OH	[N+]=C(N(C)C)N(C)C.[OH-]	0.04	4	180	90	-1	5	4352	65.4195	507.821	1.19108	256.082	202.631	49.1082	849.452
C8TMG	ZnCl4	CCCCCCCC[N+]=C(N(C)C)N(C)C.Cl[Zn-2](Cl)(Cl)Cl	0.02	4	190	150	-1	5	6559	76.6333	436.415	1.26256	218.61	130.351	87.4549	849.489
C8TMG	FeCl4	CCCCCCCC[N+]=C(N(C)C)N(C)C.Cl[Fe-](Cl)(Cl)Cl	0.04	4	190	90	-1	5	5745	67.9334	551.583	1.14748	246.606	257.591	47.3864	849.532
EMIM	NiCl4	CCN1C=C[N+](=C1)C.Cl[Ni-2](Cl)(Cl)Cl	0.04	4	190	120	-1	5	4386	73.1826	477.423	1.2218	228.917	182.551	65.9543	849.61
AMIM	ZnCl3	C[N+]1=CN(C=C1)CC=C.Cl[Zn-](Cl)Cl	0.06	4	190	120	-1	5	1852	73.8838	406.6	1.29265	226.745	114.527	65.3284	849.627
TMG	ZnCl4	[N+]=C(N(C)C)N(C)C.Cl[Zn-2](Cl)(Cl)Cl	0.08	4	180	90	-1	5	3192	76.2097	517.137	1.18232	219.825	255.157	42.1552	849.726
EMIM	ZnCl3	CCN1C=C[N+](=C1)C.Cl[Zn-](Cl)Cl	0.04	4	190	150	-1	5	1632	77.2429	368.005	1.33147	216.884	64.3555	86.7647	849.735
N2222	ZnCl4	CC[N+](CC)(CC)CC.Cl[Zn-2](Cl)(Cl)Cl	0.02	4	170	150	-1	5	5149	75.2328	415.719	1.28469	222.679	104.234	88.8055	850.203
N1111	Ac	C[N+](C)(C)C.CC(=O)[O-]	0.04	4	170	90	-1	5	2398	61.8309	440.931	1.25969	270.945	118.132	51.8542	850.312
DMIM	MnCl3	CN1C=C[N+](=C1)C.Cl[Mn-](Cl)Cl	0.04	4	190	120	-1	5	1851	68.5717	396.921	1.30395	244.31	82.2215	70.3892	850.436
C4TMG	ZnCl4	CCCC[N+]=C(N(C)C)N(C)C.Cl[Zn-2](Cl)(Cl)Cl	0.02	4	160	120	-1	5	4814	65.8959	438.354	1.26254	254.231	111.261	72.8625	850.446
EMIM	FeCl4	CCN1C=C[N+](=C1)C.Cl[Fe-](Cl)(Cl)Cl	0.06	4	190	90	-1	5	2108	66.8069	443.116	1.25802	250.764	144.167	48.1854	850.566
C6TMG	ZnCl3	CCCCCC[N+]=C(N(C)C)N(C)C.Cl[Zn-](Cl)Cl	0.06	4	190	90	-1	5	4853	74.1794	568.149	1.13299	225.841	298.911	43.3965	850.568
AMIM	ZnCl4	C[N+]1=CN(C=C1)CC=C.Cl[Zn-2](Cl)(Cl)Cl	0.04	4	190	150	-1	5	2047	77.907	381.093	1.32012	215.035	80.0323	86.0251	850.604
DMIM	ZnCl4	CN1C=C[N+](=C1)C.Cl[Zn-2](Cl)(Cl)Cl	0.04	4	180	120	-1	5	1877	68.5685	397.971	1.3034	244.322	83.3804	70.2684	850.684
C2TMG	CoCl3	CC[N+]=C(N(C)C)N(C)C.Cl[Co-](Cl)Cl	0.02	4	190	120	-1	5	6482	67.4508	466.287	1.23531	248.37	146.358	71.559	850.796
Ch	ZnCl3	C[N+](C)(C)CCO.Cl[Zn-](Cl)Cl	0.04	4	160	120	-1	5	1880	68.5004	398.253	1.30347	244.565	83.5966	70.0922	850.86
N1111	ZnCl4	C[N+](C)(C)C.Cl[Zn-2](Cl)(Cl)Cl	0.04	4	190	150	-1	5	2368	78.4307	391.015	1.3113	213.6	91.9643	85.4507	851.158
C6TMG	ZnCl4	CCCCCC[N+]=C(N(C)C)N(C)C.Cl[Zn-2](Cl)(Cl)Cl	0.04	4	180	120	-1	5	5675	75.326	515.848	1.18647	222.403	229.48	63.9645	851.158
C6TMG	Asp	CCCCCC[N+]=C(N(C)C)N(C)C.C(C(C(=O)[O-])N)C(=O)O	0.02	4	190	90	-1	5	7522	60.6725	517.99	1.1844	276.118	188.815	53.0573	851.194
N2222	Asp	CC[N+](CC)(CC)CC.C(C(C(=O)[O-])N)C(=O)O	0.02	4	190	90	-1	5	7540	60.6823	518.358	1.18421	276.074	189.236	53.0488	851.283
C2TMG	FeCl4	CC[N+]=C(N(C)C)N(C)C.Cl[Fe-](Cl)(Cl)Cl	0.04	4	190	90	-1	5	3681	64.0987	486.501	1.21613	261.359	174.92	50.2213	851.315
N1111	ZnCl3	C[N+](C)(C)C.Cl[Zn-](Cl)Cl	0.08	4	170	90	-1	5	2044	71.9336	450.566	1.25215	232.892	173.102	44.5716	851.359
DMIM	ZnCl3	CN1C=C[N+](=C1)C.Cl[Zn-](Cl)Cl	0.06	4	180	90	-1	5	1706	65.6339	422.953	1.28001	255.246	118.759	48.9478	851.481
AMIM	MnCl3	C[N+]1=CN(C=C1)CC=C.Cl[Mn-](Cl)Cl	0.06	4	190	90	-1	5	1989	66.4002	437.642	1.26572	252.3	136.861	48.4806	851.682
C6TMG	Arg	CCCCCC[N+]=C(N(C)C)N(C)C.C(CC(C(=O)[O-])N)CN=C(N)N	0.02	4	170	90	-1	5	8651	61.5887	537.992	1.16573	272.01	213.924	52.0581	851.863
DMIM	CoCl3	CN1C=C[N+](=C1)C.Cl[Co-](Cl)Cl	0.04	4	190	90	-1	5	5308	66.9548	539.765	1.16425	250.21	241.476	48.079	852.009
EMIM	FeCl4	CCN1C=C[N+](=C1)C.Cl[Fe-](Cl)(Cl)Cl	0.04	4	190	120	-1	5	2108	68.8937	406.428	1.29786	243.168	93.1998	70.0602	852.143
C6TMG	ZnCl3	CCCCCC[N+]=C(N(C)C)N(C)C.Cl[Zn-](Cl)Cl	0.04	4	180	120	-1	5	4853	73.7614	492.846	1.21163	227.121	200.403	65.3214	852.24
C8TMG	Ala	CCCCCCCC[N+]=C(N(C)C)N(C)C.CC(C(=O)[O-])N	0.02	4	190	90	-1	5	7576	60.6433	519.595	1.18497	276.251	190.262	53.0829	852.282
EMIM	MnCl3	CCN1C=C[N+](=C1)C.Cl[Mn-](Cl)Cl	0.04	4	190	120	-1	5	1767	68.2645	394.959	1.30982	245.41	78.8435	70.706	852.39
C8TMG	For	CCCCCCCC[N+]=C(N(C)C)N(C)C.C(=O)[O-]	0.02	4	190	90	-1	5	7601	60.6405	520.247	1.18502	276.264	190.898	53.0853	852.635
DMIM	FeCl4	CN1C=C[N+](=C1)C.Cl[Fe-](Cl)(Cl)Cl	0.04	4	190	120	-1	5	2198	69.0124	409.702	1.29563	242.75	97.0118	69.9397	852.664
Ch	ZnCl4	C[N+](C)(C)CCO.Cl[Zn-2](Cl)(Cl)Cl	0.08	4	190	120	-1	5	2102	79.738	431.221	1.27415	210.098	160.591	60.5321	852.685
DEIM	FeCl4	CC[N]1C=C[N+](=C1)CC.Cl[Fe-](Cl)(Cl)Cl	0.06	4	190	90	-1	5	2233	66.9706	450.561	1.25494	250.151	152.342	48.0677	852.751
TMG	Arg	[N+]=C(N(C)C)N(C)C.C(CC(C(=O)[O-])N)CN=C(N)N	0.02	4	190	90	-1	5	7652	60.6762	521.222	1.18433	276.101	192.066	53.0541	852.774
N1111	ZnCl4	C[N+](C)(C)C.Cl[Zn-2](Cl)(Cl)Cl	0.06	4	180	120	-1	5	2368	74.9403	432.213	1.27386	223.548	144.371	64.2937	853.039
C8TMG	CoCl4	CCCCCCCC[N+]=C(N(C)C)N(C)C.Cl[Co-2](Cl)(Cl)Cl	0.02	4	190	90	-1	5	8326	61.2537	533.065	1.17316	273.498	207.013	52.5539	853.113
C2TMG	ZnCl4	CC[N+]=C(N(C)C)N(C)C.Cl[Zn-2](Cl)(Cl)Cl	0.06	4	190	120	-1	5	3985	79.2737	501.89	1.20476	211.328	229.675	60.8866	853.327
TMG	Lys	[N+]=C(N(C)C)N(C)C.C(CCN)CC(C(=O)[O-])N	0.04	4	180	90	-1	5	2912	62.5289	461.15	1.24614	267.92	141.852	51.3784	853.647
N2222	ZnCl3	CC[N+](CC)(CC)CC.Cl[Zn-](Cl)Cl	0.06	4	170	90	-1	5	4258	72.2707	545.359	1.16202	231.806	269.19	44.3637	853.689
C2TMG	Pro	CC[N+]=C(N(C)C)N(C)C.CCC(=O)[O-]	0.02	4	180	90	-1	5	10054	62.7175	562.482	1.14527	267.115	244.143	51.224	853.873
Ch	ZnCl4	C[N+](C)(C)CCO.Cl[Zn-2](Cl)(Cl)Cl	0.06	4	170	120	-1	5	2102	74.0994	420.603	1.28775	226.085	129.608	64.9093	854.178
N1111	ZnCl4	C[N+](C)(C)C.Cl[Zn-2](Cl)(Cl)Cl	0.02	4	170	150	-1	5	2368	72.402	373.474	1.33492	231.385	49.811	92.2776	854.194
N1111	Arg	C[N+](C)(C)C.C(CC(C(=O)[O-])N)CN=C(N)N	0.02	4	190	90	-1	5	7781	60.6884	524.354	1.18409	276.046	195.265	53.0434	854.221
C4TMG	Leu	CCCC[N+]=C(N(C)C)N(C)C.CC(C)CC(C(=O)[O-])N	0.02	4	190	90	-1	5	7734	60.6453	523.546	1.18493	276.242	194.223	53.0811	854.238
N1111	Gly	C[N+](C)(C)C.C(C(=O)[O-])N	0.04	4	180	90	-1	5	3001	62.6411	464.652	1.24391	267.441	145.925	51.2864	854.283
N1111	But	C[N+](C)(C)C.CCCC(=O)[O-]	0.04	4	170	90	-1	5	2553	61.8188	448.655	1.25994	270.998	125.792	51.8644	854.298
N2222	Arg	CC[N+](CC)(CC)CC.C(CC(C(=O)[O-])N)CN=C(N)N	0.02	4	170	90	-1	5	8924	61.6475	544.223	1.16462	271.751	220.464	52.0085	854.423
Ch	ZnCl4	C[N+](C)(C)CCO.Cl[Zn-2](Cl)(Cl)Cl	0.06	4	160	90	-1	5	2102	66.4031	445.107	1.26422	252.289	144.63	48.1873	854.662
N2222	ZnCl4	CC[N+](CC)(CC)CC.Cl[Zn-2](Cl)(Cl)Cl	0.04	4	170	120	-1	5	5149	74.0461	503.013	1.20641	226.248	211.809	64.9561	854.711
TMG	Pro	[N+]=C(N(C)C)N(C)C.CCC(=O)[O-]	0.02	4	180	90	-1	5	10073	62.6703	563.367	1.14613	267.316	244.789	51.2625	854.747
DMIM	ZnCl4	CN1C=C[N+](=C1)C.Cl[Zn-2](Cl)(Cl)Cl	0.02	4	180	150	-1	5	1877	71.9522	365.561	1.34398	232.832	39.7296	92.999	854.77
C6TMG	ZnCl4	CCCCCC[N+]=C(N(C)C)N(C)C.Cl[Zn-2](Cl)(Cl)Cl	0.06	4	190	90	-1	5	5675	76.0047	603.918	1.10578	220.418	341.146	42.3543	854.848
Ch	HCO3	C[N+](C)(C)CCO.OC([O-])=O	0.02	4	180	120	-1	5	1984	63.0941	389.776	1.31993	265.52	47.8902	76.3652	854.854
Ch	Gly	C[N+](C)(C)CCO.C(C(=O)[O-])N	0.04	4	170	90	-1	5	2584	61.8325	450.082	1.25966	270.938	127.292	51.8529	854.871
C6TMG	ZnCl3	CCCCCC[N+]=C(N(C)C)N(C)C.Cl[Zn-](Cl)Cl	0.02	4	180	150	-1	5	4853	74.5924	413.384	1.29641	224.591	99.0854	89.7073	854.896
C8TMG	Leu	CCCCCCCC[N+]=C(N(C)C)N(C)C.CC(C)CC(C(=O)[O-])N	0.02	4	170	90	-1	5	8891	61.5745	544.053	1.166	272.073	219.909	52.0702	855.028
C4TMG	ZnCl3	CCCC[N+]=C(N(C)C)N(C)C.Cl[Zn-](Cl)Cl	0.02	4	160	120	-1	5	4096	64.8849	428.331	1.28221	258.192	96.1414	73.9979	855.271
AMIM	ZnCl3	C[N+]1=CN(C=C1)CC=C.Cl[Zn-](Cl)Cl	0.08	4	190	90	-1	5	1852	70.9647	440.418	1.27015	236.072	158.984	45.3623	855.286
TMG	ZnCl3	[N+]=C(N(C)C)N(C)C.Cl[Zn-](Cl)Cl	0.04	4	180	150	-1	5	2717	78.6366	403.376	1.30721	213.04	105.242	85.0937	855.291
C2TMG	Arg	CC[N+]=C(N(C)C)N(C)C.C(CC(C(=O)[O-])N)CN=C(N)N	0.02	4	190	90	-1	5	7861	60.6828	526.41	1.1842	276.071	197.29	53.0483	855.303
EMIM	ZnCl3	CCN1C=C[N+](=C1)C.Cl[Zn-](Cl)Cl	0.06	4	180	90	-1	5	1632	65.1245	421.069	1.29002	257.242	114.496	49.3307	855.545
Ch	Ac	C[N+](C)(C)CCO.CC(=O)[O-]	0.02	4	180	120	-1	5	2054	63.1029	391.411	1.31975	265.483	49.573	76.3546	855.58
AMIM	CoCl3	C[N+]1=CN(C=C1)CC=C.Cl[Co-](Cl)Cl	0.04	4	190	90	-1	5	5132	66.3619	536.509	1.17465	252.446	235.555	48.5085	855.581
Ch	Lys	C[N+](C)(C)CCO.C(CCN)CC(C(=O)[O-])N	0.02	4	180	120	-1	5	1993	63.0424	390.313	1.32101	265.738	48.1469	76.4278	855.664
DMIM	CrCl4	CN1C=C[N+](=C1)C.Cl[Cr-](Cl)(Cl)Cl	0.02	4	190	90	-1	5	7529	60.3536	520.904	1.19066	277.577	189.989	53.3377	855.78
N1111	FeCl4	C[N+](C)(C)C.Cl[Fe-](Cl)(Cl)Cl	0.02	4	190	90	-1	5	2546	55.9136	426.54	1.2852	299.619	69.3482	57.5731	855.872
EMIM	ZnCl3	CCN1C=C[N+](=C1)C.Cl[Zn-](Cl)Cl	0.04	4	180	120	-1	5	1632	67.7136	391.974	1.31985	247.406	73.4122	71.1555	855.913
C2TMG	OH	CC[N+]=C(N(C)C)N(C)C.[OH-]	0.02	4	190	120	-1	5	5363	66.0143	450.618	1.26219	253.775	123.727	73.1161	856.401
DMIM	ZnCl4	CN1C=C[N+](=C1)C.Cl[Zn-2](Cl)(Cl)Cl	0.02	4	190	180	-1	5	1877	82.0841	346.675	1.36638	204.093	34.8257	107.757	856.526
C4TMG	Pro	CCCC[N+]=C(N(C)C)N(C)C.CCC(=O)[O-]	0.02	4	180	90	-1	5	10289	62.7223	568.145	1.14518	267.094	249.83	51.22	856.661
Ch	Pro	C[N+](C)(C)CCO.CCC(=O)[O-]	0.02	4	170	90	-1	5	9184	61.7111	550.079	1.16342	271.471	226.654	51.9549	856.751
N1111	ZnCl3	C[N+](C)(C)C.Cl[Zn-](Cl)Cl	0.06	4	160	90	-1	5	2044	66.0771	443.292	1.27046	253.534	141.333	48.425	856.874
AMIM	NiCl4	C[N+]1=CN(C=C1)CC=C.Cl[Ni-2](Cl)(Cl)Cl	0.02	4	180	90	-1	5	4528	57.5661	466.62	1.24775	291.018	119.794	55.8078	857.186
C2TMG	OH	CC[N+]=C(N(C)C)N(C)C.[OH-]	0.02	4	180	120	-1	5	5363	65.9233	451.111	1.26329	254.125	123.898	73.0879	857.199
N1111	ZnCl3	C[N+](C)(C)C.Cl[Zn-](Cl)Cl	0.08	4	190	120	-1	5	2044	79.1109	430.173	1.28425	211.763	157.398	61.012	857.211
DEIM	MnCl3	CC[N]1C=C[N+](=C1)CC.Cl[Mn-](Cl)Cl	0.04	4	190	120	-1	5	1924	68.159	402.586	1.31185	245.789	85.9816	70.8154	857.217
N1111	For	C[N+](C)(C)C.C(=O)[O-]	0.04	4	170	90	-1	5	2691	61.8282	455.385	1.25975	270.957	132.572	51.8565	857.567
N2222	MnCl3	CC[N+](CC)(CC)CC.Cl[Mn-](Cl)Cl	0.04	4	190	90	-1	5	4478	65.0241	516.911	1.19882	257.639	209.765	49.5066	857.866
DEIM	ZnCl4	CC[N]1C=C[N+](=C1)CC.Cl[Zn-2](Cl)(Cl)Cl	0.04	4	180	120	-1	5	1966	68.1407	404.447	1.31158	245.856	87.8822	70.7095	858.013
Ch	But	C[N+](C)(C)CCO.CCCC(=O)[O-]	0.02	4	180	120	-1	5	2235	63.0822	395.909	1.32018	265.571	53.9591	76.3796	858.046
Ch	For	C[N+](C)(C)CCO.C(=O)[O-]	0.02	4	180	120	-1	5	2256	63.1004	396.302	1.3198	265.494	54.4504	76.3576	858.052
Ch	ZnCl3	C[N+](C)(C)CCO.Cl[Zn-](Cl)Cl	0.08	4	180	120	-1	5	1880	78.4095	421.17	1.2952	213.657	146.064	61.4491	858.183
N1111	Lys	C[N+](C)(C)C.C(CCN)CC(C(=O)[O-])N	0.02	4	180	120	-1	5	2193	63.0279	395.235	1.32132	265.799	52.9907	76.4454	858.277
DEIM	FeCl4	CC[N]1C=C[N+](=C1)CC.Cl[Fe-](Cl)(Cl)Cl	0.04	4	190	120	-1	5	2233	68.6193	413.603	1.30305	244.141	99.1212	70.3404	858.326
C8TMG	Arg	CCCCCCCC[N+]=C(N(C)C)N(C)C.C(CC(C(=O)[O-])N)CN=C(N)N	0.02	4	170	90	-1	5	9173	61.5865	550.921	1.16578	272.02	226.84	52.0601	858.349
C8TMG	MnCl3	CCCCCCCC[N+]=C(N(C)C)N(C)C.Cl[Mn-](Cl)Cl	0.02	4	170	90	-1	5	5846	58.6332	492.252	1.2245	285.722	151.848	54.6822	858.373
N1111	HCO3	C[N+](C)(C)C.OC([O-])=O	0.02	4	180	120	-1	5	2307	63.0914	397.59	1.31999	265.532	55.6893	76.3685	858.789
C2TMG	ZnCl4	CC[N+]=C(N(C)C)N(C)C.Cl[Zn-2](Cl)(Cl)Cl	0.08	4	190	90	-1	5	3985	78.2334	565.592	1.15214	214.138	310.306	41.1477	858.868
Ch	Ser	C[N+](C)(C)CCO.C(C(C(=O)[O-])N)O	0.04	4	180	90	-1	5	3200	62.6486	474.272	1.24376	267.409	155.583	51.2803	859.018
DMIM	FeCl4	CN1C=C[N+](=C1)C.Cl[Fe-](Cl)(Cl)Cl	0.06	4	190	90	-1	5	2198	66.3855	452.123	1.266	252.356	151.276	48.4913	859.063
N2222	ZnCl4	CC[N+](CC)(CC)CC.Cl[Zn-2](Cl)(Cl)Cl	0.04	4	160	90	-1	5	5149	66.0535	539.505	1.17868	253.624	237.439	48.4424	859.094
N1111	ZnCl3	C[N+](C)(C)C.Cl[Zn-](Cl)Cl	0.06	4	170	120	-1	5	2044	73.5182	420.323	1.29793	227.872	127.029	65.4225	859.129
DMIM	NiCl4	CN1C=C[N+](=C1)C.Cl[Ni-2](Cl)(Cl)Cl	0.02	4	190	150	-1	5	4682	74.1008	412.753	1.30571	226.081	96.2282	90.4438	859.233
C4TMG	Arg	CCCC[N+]=C(N(C)C)N(C)C.C(CC(C(=O)[O-])N)CN=C(N)N	0.02	4	190	90	-1	5	8207	60.6797	535.121	1.18426	276.085	205.985	53.051	859.689
C4TMG	ZnCl3	CCCC[N+]=C(N(C)C)N(C)C.Cl[Zn-](Cl)Cl	0.04	4	170	120	-1	5	4096	71.7402	474.473	1.24519	233.52	173.909	67.0439	859.829
N1111	Ac	C[N+](C)(C)C.CC(=O)[O-]	0.02	4	180	120	-1	5	2398	63.093	399.776	1.31996	265.525	57.8845	76.3665	859.866
C8TMG	Asp	CCCCCCCC[N+]=C(N(C)C)N(C)C.C(C(C(=O)[O-])N)C(=O)O	0.02	4	190	90	-1	5	8192	60.6484	535.02	1.18487	276.228	205.714	53.0784	859.944
EMIM	ZnCl4	CCN1C=C[N+](=C1)C.Cl[Zn-2](Cl)(Cl)Cl	0.02	4	180	150	-1	5	1769	71.4208	365.978	1.35398	234.564	37.7222	93.691	859.979
AMIM	ZnCl4	C[N+]1=CN(C=C1)CC=C.Cl[Zn-2](Cl)(Cl)Cl	0.08	4	190	90	-1	5	2047	71.264	455.237	1.26482	235.08	174.985	45.1718	860.029
C4TMG	ZnCl3	CCCC[N+]=C(N(C)C)N(C)C.Cl[Zn-](Cl)Cl	0.04	4	160	90	-1	5	4096	64.0872	506.011	1.21485	261.406	194.676	49.9287	860.429
N1111	CoCl3	C[N+](C)(C)C.Cl[Co-](Cl)Cl	0.02	4	190	90	-1	5	6002	58.6569	496.323	1.2251	285.606	155.837	54.8805	860.71
Ch	HCO3	C[N+](C)(C)CCO.OC([O-])=O	0.04	4	190	90	-1	5	1984	60.3871	430.805	1.29088	277.423	100.074	53.308	860.84
EMIM	ZnCl4	CCN1C=C[N+](=C1)C.Cl[Zn-2](Cl)(Cl)Cl	0.06	4	180	90	-1	5	1769	65.0638	431.083	1.29122	257.482	124.224	49.3767	861.154
C6TMG	Leu	CCCCCC[N+]=C(N(C)C)N(C)C.CC(C)CC(C(=O)[O-])N	0.02	4	190	90	-1	5	8277	60.6373	537.253	1.18509	276.278	207.887	53.0881	861.169
C4TMG	ZnCl4	CCCC[N+]=C(N(C)C)N(C)C.Cl[Zn-2](Cl)(Cl)Cl	0.04	4	170	120	-1	5	4814	72.8649	497.164	1.22597	229.916	201.239	66.0091	861.565
C6TMG	Pro	CCCCCC[N+]=C(N(C)C)N(C)C.CCC(=O)[O-]	0.02	4	180	90	-1	5	10682	62.7104	577.797	1.14539	267.145	259.422	51.2297	861.596
Ch	HCO3	C[N+](C)(C)CCO.OC([O-])=O	0.02	4	160	90	-1	5	1984	54.962	418.001	1.30571	304.807	54.976	58.2182	861.854
DEIM	CoCl4	CC[N]1C=C[N+](=C1)CC.Cl[Co-2](Cl)(Cl)Cl	0.02	4	190	150	-1	5	4469	73.6815	410.699	1.31314	227.367	92.3732	90.9585	861.921
Ch	ZnCl3	C[N+](C)(C)CCO.Cl[Zn-](Cl)Cl	0.02	6	190	90	-1	5	1880	75.732	421.561	1.3023	331.817	37.807	51.9368	861.931
Ch	Ac	C[N+](C)(C)CCO.CC(=O)[O-]	0.02	4	160	90	-1	5	2054	55.0181	419.512	1.30438	304.496	56.8577	58.1588	861.944
N1111	But	C[N+](C)(C)C.CCCC(=O)[O-]	0.02	4	180	120	-1	5	2553	63.0769	403.621	1.32029	265.593	61.6417	76.3861	861.957
Ch	Gly	C[N+](C)(C)CCO.C(C(=O)[O-])N	0.02	4	180	120	-1	5	2584	63.1014	404.212	1.31978	265.49	62.3659	76.3564	861.996
C8TMG	MnCl3	CCCCCCCC[N+]=C(N(C)C)N(C)C.Cl[Mn-](Cl)Cl	0.02	4	180	120	-1	5	5846	65.9674	461.96	1.26244	253.955	134.966	73.039	862.201
C4TMG	ZnCl4	CCCC[N+]=C(N(C)C)N(C)C.Cl[Zn-2](Cl)(Cl)Cl	0.02	4	170	150	-1	5	4814	73.8852	416.396	1.30812	226.74	99.2299	90.4252	862.256
Ch	Lys	C[N+](C)(C)CCO.C(CCN)CC(C(=O)[O-])N	0.04	4	190	90	-1	5	1993	60.3023	431.865	1.29269	277.813	100.669	53.383	862.278
Ch	ZnCl4	C[N+](C)(C)CCO.Cl[Zn-2](Cl)(Cl)Cl	0.04	4	160	120	-1	5	2102	67.9836	411.227	1.31338	246.424	94.1786	70.625	862.302
Ch	Lys	C[N+](C)(C)CCO.C(CCN)CC(C(=O)[O-])N	0.02	4	160	90	-1	5	1993	54.9386	418.428	1.30626	304.936	55.2489	58.243	862.345
Ch	Ac	C[N+](C)(C)CCO.CC(=O)[O-]	0.04	4	190	90	-1	5	2054	60.3733	434.435	1.29117	277.487	103.629	53.3203	862.804
Ch	ZnCl4	C[N+](C)(C)CCO.Cl[Zn-2](Cl)(Cl)Cl	0.1	4	180	90	-1	5	2102	76.5859	469.694	1.25605	218.745	209.001	41.9481	862.872
Ch	ZnCl3	C[N+](C)(C)CCO.Cl[Zn-](Cl)Cl	0.02	4	190	180	-1	5	1880	81.4722	349.335	1.37664	205.626	35.1433	108.566	862.986
DMIM	ZnCl3	CN1C=C[N+](=C1)C.Cl[Zn-](Cl)Cl	0.02	4	180	150	-1	5	1706	71.1111	366.222	1.35988	235.586	36.5372	94.0989	863.049
C2TMG	ZnCl4	CC[N+]=C(N(C)C)N(C)C.Cl[Zn-2](Cl)(Cl)Cl	0.04	4	190	150	-1	5	3985	80.1905	443.854	1.28252	208.912	151.366	83.5755	863.189
C4TMG	NiCl4	CCCC[N+]=C(N(C)C)N(C)C.Cl[Ni-2](Cl)(Cl)Cl	0.02	4	190	90	-1	5	6889	59.2709	513.974	1.21241	282.647	177.014	54.312	863.19
C8TMG	ZnCl3	CCCCCCCC[N+]=C(N(C)C)N(C)C.Cl[Zn-](Cl)Cl	0.02	4	190	150	-1	5	5644	74.6068	429.591	1.29686	224.548	115.213	89.8305	863.225
Ch	OH	C[N+](C)(C)CCO.[OH-]	0.04	4	170	90	-1	5	2579	61.2109	454.404	1.27245	273.689	128.335	52.3794	863.428
N1111	For	C[N+](C)(C)C.C(=O)[O-]	0.02	4	180	120	-1	5	2691	63.0897	406.87	1.32002	265.539	64.9605	76.3705	863.447
C6TMG	CoCl4	CCCCCC[N+]=C(N(C)C)N(C)C.Cl[Co-2](Cl)(Cl)Cl	0.02	4	190	90	-1	5	7598	59.8748	526.824	1.20018	279.797	193.263	53.7642	863.5
C2TMG	ZnCl3	CC[N+]=C(N(C)C)N(C)C.Cl[Zn-](Cl)Cl	0.04	4	190	150	-1	5	3383	79.0912	426.839	1.30035	211.816	130.286	84.7371	863.595
N1111	Pro	C[N+](C)(C)C.CCC(=O)[O-]	0.02	4	180	90	-1	5	10949	62.7823	583.612	1.14408	266.839	265.602	51.1711	863.847
N2222	Leu	CC[N+](CC)(CC)CC.CC(C)CC(C(=O)[O-])N	0.02	4	190	90	-1	5	8495	60.6384	542.719	1.18506	276.273	213.358	53.0872	863.892
EMIM	ZnCl4	CCN1C=C[N+](=C1)C.Cl[Zn-2](Cl)(Cl)Cl	0.02	4	190	180	-1	5	1769	81.2794	348.084	1.3799	206.113	33.1468	108.824	863.994
DEIM	ZnCl3	CC[N]1C=C[N+](=C1)CC.Cl[Zn-](Cl)Cl	0.04	4	190	150	-1	5	1790	76.2448	379.134	1.3489	219.724	71.51	87.9006	864.015
C8TMG	ZnCl4	CCCCCCCC[N+]=C(N(C)C)N(C)C.Cl[Zn-2](Cl)(Cl)Cl	0.04	4	190	120	-1	5	6559	75.7904	548.327	1.17976	221.041	263.601	63.685	864.042
N1111	ZnCl3	C[N+](C)(C)C.Cl[Zn-](Cl)Cl	0.04	4	160	120	-1	5	2044	67.7396	410.101	1.31811	247.311	91.9099	70.8794	864.104
C4TMG	CrCl4	CCCC[N+]=C(N(C)C)N(C)C.Cl[Cr-](Cl)(Cl)Cl	0.02	4	180	90	-1	5	8593	60.6872	544.635	1.18358	276.051	215.646	52.9376	864.107
TMG	ZnCl4	[N+]=C(N(C)C)N(C)C.Cl[Zn-2](Cl)(Cl)Cl	0.04	4	180	150	-1	5	3192	78.6705	421.594	1.30664	212.949	123.588	85.0571	864.118
TMG	HCO3	[N+]=C(N(C)C)N(C)C.OC([O-])=O	0.04	4	180	90	-1	5	3346	62.5333	482.258	1.24606	267.902	162.982	51.3748	864.158
Ch	Ala	C[N+](C)(C)CCO.CC(C(=O)[O-])N	0.04	4	180	90	-1	5	3412	62.6366	484.672	1.244	267.46	165.922	51.2901	864.337
AMIM	ZnCl3	C[N+]1=CN(C=C1)CC=C.Cl[Zn-](Cl)Cl	0.04	4	190	150	-1	5	1852	76.2933	381.368	1.34804	219.584	73.9398	87.8446	864.703
C2TMG	ZnCl3	CC[N+]=C(N(C)C)N(C)C.Cl[Zn-](Cl)Cl	0.06	4	180	120	-1	5	3383	76.6109	483.322	1.24609	218.674	201.756	62.8918	864.704
Ch	But	C[N+](C)(C)CCO.CCCC(=O)[O-]	0.02	4	160	90	-1	5	2235	54.993	424.716	1.30497	304.635	61.8962	58.1854	864.843
C6TMG	MnCl3	CCCCCC[N+]=C(N(C)C)N(C)C.Cl[Mn-](Cl)Cl	0.02	4	180	120	-1	5	5048	65.0557	449.752	1.28013	257.514	118.176	74.0626	864.942
Ch	For	C[N+](C)(C)CCO.C(=O)[O-]	0.02	4	160	90	-1	5	2256	55.0038	425.214	1.30471	304.575	62.4656	58.174	864.964
N1111	Gly	C[N+](C)(C)C.C(C(=O)[O-])N	0.04	4	170	90	-1	5	3001	61.8293	470.649	1.25973	270.952	147.841	51.8556	865.188
N2222	ZnCl3	CC[N+](CC)(CC)CC.Cl[Zn-](Cl)Cl	0.06	4	190	120	-1	5	4258	78.9057	520.039	1.21038	212.314	246.554	61.1706	865.211
TMG	Lys	[N+]=C(N(C)C)N(C)C.C(CCN)CC(C(=O)[O-])N	0.04	4	170	90	-1	5	2912	61.6667	467.494	1.26305	271.666	143.835	51.9923	865.271
AMIM	CoCl4	C[N+]1=CN(C=C1)CC=C.Cl[Co-2](Cl)(Cl)Cl	0.02	4	190	150	-1	5	4574	73.4818	413.992	1.31671	227.985	94.8005	91.2058	865.352
TMG	But	[N+]=C(N(C)C)N(C)C.CCCC(=O)[O-]	0.04	4	180	90	-1	5	3408	62.5506	485.144	1.24571	267.827	165.956	51.3606	865.428
N1111	Lys	C[N+](C)(C)C.C(CCN)CC(C(=O)[O-])N	0.02	4	160	90	-1	5	2193	54.918	424.132	1.30675	305.051	60.816	58.2648	865.442
C6TMG	Arg	CCCCCC[N+]=C(N(C)C)N(C)C.C(CC(C(=O)[O-])N)CN=C(N)N	0.02	4	190	90	-1	5	8651	60.6658	546.39	1.18453	276.149	217.178	53.0632	865.46
C2TMG	ZnCl3	CC[N+]=C(N(C)C)N(C)C.Cl[Zn-](Cl)Cl	0.08	4	180	90	-1	5	3383	75.4806	537.547	1.19374	221.948	273.036	42.5624	865.641
C8TMG	ZnCl4	CCCCCCCC[N+]=C(N(C)C)N(C)C.Cl[Zn-2](Cl)(Cl)Cl	0.02	4	180	150	-1	5	6559	75.1474	444.905	1.28683	222.932	132.928	89.0447	865.87
DEIM	NiCl4	CC[N]1C=C[N+](=C1)CC.Cl[Ni-2](Cl)(Cl)Cl	0.06	4	190	90	-1	5	4423	71.7335	560.133	1.17162	233.542	281.715	44.8761	865.876
BMIM	ZnCl3	CCCCN1C=C[N+](=C1)C.Cl[Zn-](Cl)Cl	0.02	4	190	90	-1	5	1558	54.3926	410.804	1.32114	307.997	43.6236	59.183	865.973
TMG	Ac	[N+]=C(N(C)C)N(C)C.CC(=O)[O-]	0.04	4	180	90	-1	5	3427	62.5429	486.129	1.24586	267.86	166.901	51.3669	865.997
N2222	CoCl3	CC[N+](CC)(CC)CC.Cl[Co-](Cl)Cl	0.02	4	180	90	-1	5	7513	59.5705	527.233	1.20577	281.226	192.077	53.93	866.5
Ch	ZnCl4	C[N+](C)(C)CCO.Cl[Zn-2](Cl)(Cl)Cl	0.02	4	190	180	-1	5	2102	81.3294	354.106	1.37906	205.987	39.3622	108.757	866.581
N1111	HCO3	C[N+](C)(C)C.OC([O-])=O	0.02	4	160	90	-1	5	2307	54.9409	427.115	1.30621	304.924	63.9508	58.2405	866.661
C6TMG	ZnCl3	CCCCCC[N+]=C(N(C)C)N(C)C.Cl[Zn-](Cl)Cl	0.06	4	180	90	-1	5	4853	72.7785	578.996	1.15435	230.188	304.665	44.1427	866.674
DMIM	MnCl3	CN1C=C[N+](=C1)C.Cl[Mn-](Cl)Cl	0.02	4	180	90	-1	5	1851	54.5801	417.449	1.31601	306.939	51.6495	58.8609	866.731
AMIM	MnCl3	C[N+]1=CN(C=C1)CC=C.Cl[Mn-](Cl)Cl	0.04	4	190	120	-1	5	1989	67.5151	409.359	1.32436	248.134	89.7342	71.4909	866.86
N1111	Ac	C[N+](C)(C)C.CC(=O)[O-]	0.02	4	160	90	-1	5	2398	55.0048	429.138	1.30469	304.569	66.3961	58.1728	866.914
C4TMG	ZnCl4	CCCC[N+]=C(N(C)C)N(C)C.Cl[Zn-2](Cl)(Cl)Cl	0.04	4	160	90	-1	5	4814	64.8488	533.793	1.20058	258.336	226.114	49.3423	867.186
N1111	Gly	C[N+](C)(C)C.C(C(=O)[O-])N	0.02	4	180	120	-1	5	3001	63.0873	414.369	1.32007	265.549	72.4466	76.3734	867.222
N1111	Lys	C[N+](C)(C)C.C(CCN)CC(C(=O)[O-])N	0.04	4	190	90	-1	5	2193	60.2934	442.033	1.29288	277.854	110.788	53.3909	867.458
TMG	Lys	[N+]=C(N(C)C)N(C)C.C(CCN)CC(C(=O)[O-])N	0.02	4	180	120	-1	5	2912	62.9831	412.903	1.32226	265.988	70.4144	76.4998	867.581
C6TMG	MnCl3	CCCCCC[N+]=C(N(C)C)N(C)C.Cl[Mn-](Cl)Cl	0.02	4	170	90	-1	5	5048	57.3066	482.44	1.25284	292.336	134.156	55.9481	867.641
Ch	But	C[N+](C)(C)CCO.CCCC(=O)[O-]	0.04	4	190	90	-1	5	2235	60.3488	443.747	1.2917	277.599	112.806	53.3419	867.722
DEIM	ZnCl4	CC[N]1C=C[N+](=C1)CC.Cl[Zn-2](Cl)(Cl)Cl	0.06	4	180	90	-1	5	1966	65.0875	444.754	1.29075	257.388	138.007	49.3587	867.754
N2222	FeCl4	CC[N+](CC)(CC)CC.Cl[Fe-](Cl)(Cl)Cl	0.02	4	190	120	-1	5	4499	64.3785	441.628	1.29426	260.223	106.431	74.9739	867.942
N1111	ZnCl3	C[N+](C)(C)C.Cl[Zn-](Cl)Cl	0.1	4	180	90	-1	5	2044	75.8833	468.222	1.26768	220.77	205.116	42.3366	867.952
Ch	For	C[N+](C)(C)CCO.C(=O)[O-]	0.04	4	190	90	-1	5	2256	60.3694	444.655	1.29125	277.504	113.827	53.3237	867.955
C8TMG	Pro	CCCCCCCC[N+]=C(N(C)C)N(C)C.CCC(=O)[O-]	0.02	4	180	90	-1	5	11189	62.694	590.264	1.14569	267.215	271.806	51.2431	867.979
C4TMG	ZnCl3	CCCC[N+]=C(N(C)C)N(C)C.Cl[Zn-](Cl)Cl	0.06	4	170	90	-1	5	4096	70.6447	547.435	1.18877	237.141	264.908	45.3848	868.1
TMG	FeCl4	[N+]=C(N(C)C)N(C)C.Cl[Fe-](Cl)(Cl)Cl	0.02	4	190	120	-1	5	3098	63.135	416.531	1.31975	265.348	74.7317	76.4506	868.139
Ch	ZnCl3	C[N+](C)(C)CCO.Cl[Zn-](Cl)Cl	0.04	4	170	150	-1	5	1880	75.9669	383.855	1.35246	220.527	75.3802	87.9474	868.159
C8TMG	ZnCl3	CCCCCCCC[N+]=C(N(C)C)N(C)C.Cl[Zn-](Cl)Cl	0.04	4	190	120	-1	5	5644	73.8176	525.225	1.21129	226.948	232.89	65.387	868.256
TMG	ZnCl3	[N+]=C(N(C)C)N(C)C.Cl[Zn-](Cl)Cl	0.08	4	170	90	-1	5	2717	72.8687	501.048	1.23608	229.903	227.145	43.9996	868.565
N2222	Arg	CC[N+](CC)(CC)CC.C(CC(C(=O)[O-])N)CN=C(N)N	0.02	4	190	90	-1	5	8924	60.6816	553.099	1.18422	276.077	223.973	53.0494	868.66
N1111	HCO3	C[N+](C)(C)C.OC([O-])=O	0.04	4	190	90	-1	5	2307	60.3874	447.096	1.29087	277.422	116.366	53.3079	868.984
C2TMG	Pro	CC[N+]=C(N(C)C)N(C)C.CCC(=O)[O-]	0.02	4	170	90	-1	5	10054	61.6018	572.564	1.16549	271.952	248.565	52.047	869.025
AMIM	FeCl4	C[N+]1=CN(C=C1)CC=C.Cl[Fe-](Cl)(Cl)Cl	0.04	4	190	120	-1	5	2292	67.8754	420.783	1.31733	246.817	102.855	71.1113	869.056
C8TMG	Leu	CCCCCCCC[N+]=C(N(C)C)N(C)C.CC(C)CC(C(=O)[O-])N	0.02	4	190	90	-1	5	8891	60.6231	552.804	1.18536	276.343	223.36	53.1005	869.083
N1111	But	C[N+](C)(C)C.CCCC(=O)[O-]	0.02	4	160	90	-1	5	2553	54.9887	433.557	1.30507	304.658	70.7085	58.1899	869.314
AMIM	FeCl4	C[N+]1=CN(C=C1)CC=C.Cl[Fe-](Cl)(Cl)Cl	0.06	4	190	90	-1	5	2292	65.8491	462.328	1.27632	254.412	159.03	48.8864	869.322
Ch	Gly	C[N+](C)(C)CCO.C(C(=O)[O-])N	0.02	4	160	90	-1	5	2584	55.0055	434.283	1.30467	304.566	71.5452	58.1722	869.479
Ch	Ser	C[N+](C)(C)CCO.C(C(C(=O)[O-])N)O	0.02	4	180	120	-1	5	3200	63.0972	419.107	1.31987	265.507	77.2385	76.3615	869.488
DEIM	NiCl4	CC[N]1C=C[N+](=C1)CC.Cl[Ni-2](Cl)(Cl)Cl	0.04	4	190	120	-1	5	4423	71.5723	489.739	1.24929	234.068	188.233	67.4382	869.512
Ch	Ser	C[N+](C)(C)CCO.C(C(C(=O)[O-])N)O	0.04	4	170	90	-1	5	3200	61.8455	480.327	1.2594	270.881	157.604	51.842	869.862
DMIM	FeCl4	CN1C=C[N+](=C1)C.Cl[Fe-](Cl)(Cl)Cl	0.02	4	190	150	-1	5	2198	71.0073	377.458	1.3626	235.93	47.1432	94.3841	870.028
C4TMG	ZnCl3	CCCC[N+]=C(N(C)C)N(C)C.Cl[Zn-](Cl)Cl	0.02	4	170	150	-1	5	4096	72.5968	408.723	1.33133	230.765	85.9283	92.0301	870.028
N1111	Ser	C[N+](C)(C)C.C(C(C(=O)[O-])N)O	0.04	4	180	90	-1	5	3650	62.6428	496.197	1.24388	267.433	177.479	51.285	870.038
BMIM	ZnCl4	CCCCN1C=C[N+](=C1)C.Cl[Zn-2](Cl)(Cl)Cl	0.02	4	190	90	-1	5	1659	54.224	414.918	1.32525	308.955	46.596	59.3671	870.085
Ch	ZnCl4	C[N+](C)(C)CCO.Cl[Zn-2](Cl)(Cl)Cl	0.02	6	190	90	-1	5	2102	75.1977	429.052	1.31155	334.174	42.5718	52.3058	870.303
TMG	Pro	[N+]=C(N(C)C)N(C)C.CCC(=O)[O-]	0.02	4	170	90	-1	5	10073	61.527	573.731	1.1669	272.283	249.337	52.1104	870.318
C2TMG	Lys	CC[N+]=C(N(C)C)N(C)C.C(CCN)CC(C(=O)[O-])N	0.04	4	180	90	-1	5	3619	62.5583	495.357	1.24556	267.794	176.209	51.3543	870.458
TMG	FeCl4	[N+]=C(N(C)C)N(C)C.Cl[Fe-](Cl)(Cl)Cl	0.04	4	190	90	-1	5	3098	61.6377	477.115	1.26469	271.794	153.094	52.2265	870.901
DEIM	ZnCl3	CC[N]1C=C[N+](=C1)CC.Cl[Zn-](Cl)Cl	0.06	4	180	90	-1	5	1790	64.3899	437.084	1.30474	260.177	127.014	49.8935	870.912
N2222	FeCl4	CC[N+](CC)(CC)CC.Cl[Fe-](Cl)(Cl)Cl	0.02	4	180	90	-1	5	4499	56.6256	473.59	1.26847	295.852	121.003	56.7347	871.032
N1111	For	C[N+](C)(C)C.C(=O)[O-]	0.02	4	160	90	-1	5	2691	54.9946	437.332	1.30493	304.626	74.5226	58.1837	871.133
Ch	ZnCl3	C[N+](C)(C)CCO.Cl[Zn-](Cl)Cl	0.06	4	190	150	-1	5	1880	80.9106	396.046	1.3464	207.053	106.162	82.8317	871.225
C8TMG	CrCl4	CCCCCCCC[N+]=C(N(C)C)N(C)C.Cl[Cr-](Cl)(Cl)Cl	0.02	4	190	120	-1	5	9460	68.4699	525.587	1.21692	244.674	210.419	70.4939	871.253
DMIM	ZnCl3	CN1C=C[N+](=C1)C.Cl[Zn-](Cl)Cl	0.02	4	190	180	-1	5	1706	80.5371	350.1	1.39262	208.013	32.2609	109.826	871.361
Ch	HCO3	C[N+](C)(C)CCO.OC([O-])=O	0.02	4	170	120	-1	5	1984	61.8694	397.355	1.34538	270.776	48.8382	77.7402	871.368
AMIM	ZnCl4	C[N+]1=CN(C=C1)CC=C.Cl[Zn-2](Cl)(Cl)Cl	0.04	4	180	120	-1	5	2047	67.2355	413.562	1.32924	249.166	92.7349	71.6615	871.4
N1111	Ac	C[N+](C)(C)C.CC(=O)[O-]	0.04	4	190	90	-1	5	2398	60.3751	451.777	1.29113	277.478	120.98	53.3187	871.455
TMG	ZnCl3	[N+]=C(N(C)C)N(C)C.Cl[Zn-](Cl)Cl	0.06	4	170	120	-1	5	2717	74.2413	457.647	1.28529	225.653	167.209	64.7852	871.469
C4TMG	OH	CCCC[N+]=C(N(C)C)N(C)C.[OH-]	0.02	4	180	120	-1	5	6368	65.712	475.854	1.26735	254.942	147.588	73.3229	871.601
EMIM	NiCl4	CCN1C=C[N+](=C1)C.Cl[Ni-2](Cl)(Cl)Cl	0.02	4	190	150	-1	5	4386	72.7877	414.005	1.32927	230.159	91.7708	92.0754	871.637
Ch	FeCl4	C[N+](C)(C)CCO.Cl[Fe-](Cl)(Cl)Cl	0.04	4	190	90	-1	5	2345	60.2603	449.959	1.29359	278.007	118.532	53.4202	871.776
Ch	Pro	C[N+](C)(C)CCO.CCC(=O)[O-]	0.02	4	190	90	-1	5	9184	60.6917	559.532	1.18402	276.031	230.461	53.0406	871.778
Ch	Ac	C[N+](C)(C)CCO.CC(=O)[O-]	0.02	4	170	120	-1	5	2054	61.8952	398.912	1.34482	270.664	50.5403	77.7079	871.866
C4TMG	Pro	CCCC[N+]=C(N(C)C)N(C)C.CCC(=O)[O-]	0.02	4	170	90	-1	5	10289	61.6058	578.337	1.16541	271.935	254.358	52.0437	871.874
C6TMG	CrCl4	CCCCCC[N+]=C(N(C)C)N(C)C.Cl[Cr-](Cl)(Cl)Cl	0.02	4	190	120	-1	5	8986	67.9962	518.631	1.2254	246.378	201.268	70.985	872.014
Ch	Lys	C[N+](C)(C)CCO.C(CCN)CC(C(=O)[O-])N	0.02	4	170	120	-1	5	1993	61.8296	397.832	1.34625	270.951	49.0913	77.7902	872.039
C2TMG	ZnCl4	CC[N+]=C(N(C)C)N(C)C.Cl[Zn-2](Cl)(Cl)Cl	0.06	4	180	120	-1	5	3985	77.5408	512.997	1.23114	216.051	234.808	62.1375	872.07
C8TMG	Arg	CCCCCCCC[N+]=C(N(C)C)N(C)C.C(CC(C(=O)[O-])N)CN=C(N)N	0.02	4	190	90	-1	5	9173	60.6599	559.549	1.18464	276.176	230.305	53.0684	872.097
N1111	ZnCl3	C[N+](C)(C)C.Cl[Zn-](Cl)Cl	0.02	4	190	180	-1	5	2044	80.7624	355.498	1.38874	207.433	38.5448	109.52	872.118
Ch	Ala	C[N+](C)(C)CCO.CC(C(=O)[O-])N	0.02	4	180	120	-1	5	3412	63.0879	424.287	1.32006	265.547	82.3677	76.3728	872.175
EMIM	FeCl4	CCN1C=C[N+](=C1)C.Cl[Fe-](Cl)(Cl)Cl	0.02	4	180	90	-1	5	2108	54.4538	425.606	1.31907	307.651	58.9571	58.9975	872.336
TMG	ZnCl3	[N+]=C(N(C)C)N(C)C.Cl[Zn-](Cl)Cl	0.1	4	190	90	-1	5	2717	78.4606	518.242	1.22645	213.518	263.695	41.0285	872.346
Ch	ZnCl4	C[N+](C)(C)CCO.Cl[Zn-2](Cl)(Cl)Cl	0.08	4	180	120	-1	5	2102	77.9116	441.22	1.30347	215.023	164.356	61.8418	872.347
TMG	CoCl3	[N+]=C(N(C)C)N(C)C.Cl[Co-](Cl)Cl	0.02	4	190	120	-1	5	6124	65.47	472.067	1.27268	255.885	142.458	73.724	872.373
TMG	HCO3	[N+]=C(N(C)C)N(C)C.OC([O-])=O	0.02	4	180	120	-1	5	3346	62.9904	423.348	1.32211	265.958	80.8995	76.491	872.727
N2222	ZnCl3	CC[N+](CC)(CC)CC.Cl[Zn-](Cl)Cl	0.04	4	190	150	-1	5	4258	79.7851	456.532	1.28904	209.974	162.558	84.0001	872.787
DMIM	ZnCl4	CN1C=C[N+](=C1)C.Cl[Zn-2](Cl)(Cl)Cl	0.06	4	180	90	-1	5	1877	64.4699	442.707	1.30312	259.854	133.022	49.8316	872.913
C6TMG	ZnCl4	CCCCCC[N+]=C(N(C)C)N(C)C.Cl[Zn-2](Cl)(Cl)Cl	0.02	4	160	120	-1	5	5675	64.9506	464.923	1.28091	257.931	133.069	73.923	872.918
AMIM	NiCl4	C[N+]1=CN(C=C1)CC=C.Cl[Ni-2](Cl)(Cl)Cl	0.06	4	190	90	-1	5	4528	71.4229	569.286	1.17671	234.558	289.657	45.0713	873
AMIM	NiCl4	C[N+]1=CN(C=C1)CC=C.Cl[Ni-2](Cl)(Cl)Cl	0.04	4	190	120	-1	5	4528	71.4645	494.953	1.25117	234.421	192.992	67.54	873.062
N2222	ZnCl3	CC[N+](CC)(CC)CC.Cl[Zn-](Cl)Cl	0.08	4	190	90	-1	5	4258	77.91	589.286	1.15693	215.027	332.94	41.3184	873.106
C4TMG	MnCl3	CCCC[N+]=C(N(C)C)N(C)C.Cl[Mn-](Cl)Cl	0.02	4	180	120	-1	5	4284	63.7686	440.584	1.30597	262.712	102.314	75.5575	873.278
TMG	But	[N+]=C(N(C)C)N(C)C.CCCC(=O)[O-]	0.02	4	180	120	-1	5	3408	63.0005	424.779	1.32189	265.915	82.3853	76.4787	873.337
TMG	Ac	[N+]=C(N(C)C)N(C)C.CC(=O)[O-]	0.02	4	180	120	-1	5	3427	63.0013	425.232	1.32188	265.911	82.8435	76.4777	873.554
DEIM	ZnCl4	CC[N]1C=C[N+](=C1)CC.Cl[Zn-2](Cl)(Cl)Cl	0.02	4	180	150	-1	5	1966	70.4791	375.125	1.37207	237.699	42.4832	94.9428	873.598
TMG	CoCl3	[N+]=C(N(C)C)N(C)C.Cl[Co-](Cl)Cl	0.02	4	180	90	-1	5	6124	57.8671	506.197	1.24126	289.504	161.175	55.5175	873.729
C2TMG	OH	CC[N+]=C(N(C)C)N(C)C.[OH-]	0.04	4	180	90	-1	5	5363	65.3555	555.437	1.19225	256.333	249.948	49.1563	873.843
TMG	For	[N+]=C(N(C)C)N(C)C.C(=O)[O-]	0.04	4	180	90	-1	5	3737	62.5207	501.404	1.24631	267.956	182.064	51.3852	873.856
N2222	Pro	CC[N+](CC)(CC)CC.CCC(=O)[O-]	0.02	4	180	90	-1	5	11780	62.7682	603.906	1.14434	266.899	285.825	51.1825	874.123
C2TMG	OH	CC[N+]=C(N(C)C)N(C)C.[OH-]	0.04	4	190	90	-1	5	5363	65.3518	555.568	1.19281	256.348	249.962	49.2583	874.189
N2222	CoCl3	CC[N+](CC)(CC)CC.Cl[Co-](Cl)Cl	0.02	4	190	120	-1	5	7513	66.5358	496.299	1.25229	251.786	171.97	72.5431	874.296
DEIM	ZnCl3	CC[N]1C=C[N+](=C1)CC.Cl[Zn-](Cl)Cl	0.04	4	180	120	-1	5	1790	66.5572	406.015	1.34278	251.705	81.9186	72.3919	874.4
Ch	But	C[N+](C)(C)CCO.CCCC(=O)[O-]	0.02	4	170	120	-1	5	2235	61.8708	403.524	1.34535	270.77	55.0156	77.7385	874.438
Ch	For	C[N+](C)(C)CCO.C(=O)[O-]	0.02	4	170	120	-1	5	2256	61.8887	403.924	1.34496	270.692	55.5165	77.716	874.443
EMIM	MnCl3	CCN1C=C[N+](=C1)C.Cl[Mn-](Cl)Cl	0.02	4	180	90	-1	5	1767	54.0229	419.387	1.32959	310.105	49.8141	59.468	874.487
N1111	ZnCl4	C[N+](C)(C)C.Cl[Zn-2](Cl)(Cl)Cl	0.04	4	180	150	-1	5	2368	76.3011	401.791	1.34722	219.561	94.5311	87.6983	874.504
N1111	Lys	C[N+](C)(C)C.C(CCN)CC(C(=O)[O-])N	0.02	4	170	120	-1	5	2193	61.8141	402.86	1.34658	271.019	54.0313	77.8098	874.722
N1111	Ser	C[N+](C)(C)C.C(C(C(=O)[O-])N)O	0.02	4	180	120	-1	5	3650	63.0918	430.006	1.31998	265.53	88.1078	76.3681	874.994
C6TMG	ZnCl4	CCCCCC[N+]=C(N(C)C)N(C)C.Cl[Zn-2](Cl)(Cl)Cl	0.06	4	180	90	-1	5	5675	74.2316	618.256	1.13175	225.682	349.295	43.2786	875.005
DEIM	FeCl4	CC[N]1C=C[N+](=C1)CC.Cl[Fe-](Cl)(Cl)Cl	0.02	4	180	90	-1	5	2233	54.3805	429.68	1.32084	308.066	62.5374	59.077	875.262
N2222	OH	CC[N+](CC)(CC)CC.[OH-]	0.02	4	190	120	-1	5	7333	66.2995	493.932	1.25676	252.683	168.448	72.8016	875.344
Ch	Ala	C[N+](C)(C)CCO.CC(C(=O)[O-])N	0.04	4	170	90	-1	5	3412	61.826	490.923	1.25979	270.967	168.098	51.8584	875.359
N1111	Gly	C[N+](C)(C)C.C(C(=O)[O-])N	0.02	4	160	90	-1	5	3001	54.9946	445.917	1.30493	304.626	83.1075	58.1837	875.425
Ch	OH	C[N+](C)(C)CCO.[OH-]	0.06	4	190	90	-1	5	2579	66.1374	480.139	1.27075	253.302	178.164	48.6732	875.445
TMG	Gly	[N+]=C(N(C)C)N(C)C.C(C(=O)[O-])N	0.04	4	180	90	-1	5	3820	62.5475	505.232	1.24577	267.841	186.028	51.3632	875.503
N1111	HCO3	C[N+](C)(C)C.OC([O-])=O	0.02	4	170	120	-1	5	2307	61.855	405.4	1.34569	270.839	56.8024	77.7584	875.547
C2TMG	Lys	CC[N+]=C(N(C)C)N(C)C.C(CCN)CC(C(=O)[O-])N	0.02	4	180	120	-1	5	3619	63.0114	429.806	1.32167	265.869	87.4709	76.4655	875.736
N1111	But	C[N+](C)(C)C.CCCC(=O)[O-]	0.04	4	190	90	-1	5	2553	60.3456	459.822	1.29177	277.614	128.863	53.3448	875.794
TMG	ZnCl3	[N+]=C(N(C)C)N(C)C.Cl[Zn-](Cl)Cl	0.02	6	190	90	-1	5	2717	75.2588	441.149	1.31049	333.903	54.9827	52.2633	875.819
TMG	ZnCl3	[N+]=C(N(C)C)N(C)C.Cl[Zn-](Cl)Cl	0.06	4	160	90	-1	5	2717	66.4031	487.422	1.26422	252.289	186.946	48.1873	875.82
C4TMG	OH	CCCC[N+]=C(N(C)C)N(C)C.[OH-]	0.02	4	190	120	-1	5	6368	65.4221	478.093	1.27361	256.072	148.242	73.778	875.852
DMIM	OH	CN1C=C[N+](=C1)C.[OH-]	0.02	4	190	90	-1	5	2213	54.3466	429.507	1.32226	308.258	62.0159	59.2331	875.884
C8TMG	ZnCl3	CCCCCCCC[N+]=C(N(C)C)N(C)C.Cl[Zn-](Cl)Cl	0.02	4	180	150	-1	5	5644	73.4844	436.01	1.31596	227.977	116.973	91.0598	875.983
N1111	Ac	C[N+](C)(C)C.CC(=O)[O-]	0.02	4	170	120	-1	5	2398	61.8912	407.402	1.34491	270.681	59.0085	77.7128	876.155
Ch	Gly	C[N+](C)(C)CCO.C(C(=O)[O-])N	0.04	4	190	90	-1	5	2584	60.3707	461.195	1.29123	277.499	130.374	53.3226	876.212
AMIM	ZnCl4	C[N+]1=CN(C=C1)CC=C.Cl[Zn-2](Cl)(Cl)Cl	0.02	4	190	180	-1	5	2047	80.3831	357.232	1.39529	208.412	38.7835	110.037	876.261
TMG	HCO3	[N+]=C(N(C)C)N(C)C.OC([O-])=O	0.04	4	170	90	-1	5	3346	61.6369	489.167	1.26366	271.798	165.352	52.0174	876.412
TMG	ZnCl3	[N+]=C(N(C)C)N(C)C.Cl[Zn-](Cl)Cl	0.02	4	190	180	-1	5	2717	80.9491	367.34	1.38553	206.954	51.1177	109.268	876.437
DEIM	ZnCl4	CC[N]1C=C[N+](=C1)CC.Cl[Zn-2](Cl)(Cl)Cl	0.02	4	190	180	-1	5	1966	80.2817	356.146	1.39705	208.675	37.2959	110.176	876.599
C6TMG	ZnCl3	CCCCCC[N+]=C(N(C)C)N(C)C.Cl[Zn-](Cl)Cl	0.02	4	160	120	-1	5	4853	63.9531	452.599	1.30089	261.954	115.569	75.076	876.746
C6TMG	Pro	CCCCCC[N+]=C(N(C)C)N(C)C.CCC(=O)[O-]	0.02	4	170	90	-1	5	10682	61.5899	588.205	1.16571	272.005	264.142	52.0572	876.959
EMIM	FeCl4	CCN1C=C[N+](=C1)C.Cl[Fe-](Cl)(Cl)Cl	0.02	4	190	150	-1	5	2108	70.3662	378.949	1.37501	238.08	45.6248	95.2441	876.981
Ch	FeCl4	C[N+](C)(C)CCO.Cl[Fe-](Cl)(Cl)Cl	0.02	4	190	120	-1	5	2345	61.8341	406.748	1.34751	270.931	57.7576	78.059	877.131
N1111	Ala	C[N+](C)(C)C.CC(C(=O)[O-])N	0.04	4	180	90	-1	5	3946	62.633	510.669	1.24407	267.475	191.901	51.293	877.371
TMG	But	[N+]=C(N(C)C)N(C)C.CCCC(=O)[O-]	0.04	4	170	90	-1	5	3408	61.677	491.911	1.26284	271.621	168.306	51.9836	877.374
N1111	ZnCl3	C[N+](C)(C)C.Cl[Zn-](Cl)Cl	0.08	4	180	120	-1	5	2044	77.2579	440.38	1.3145	216.842	161.173	62.3651	877.442
N2222	ZnCl4	CC[N+](CC)(CC)CC.Cl[Zn-2](Cl)(Cl)Cl	0.06	4	170	90	-1	5	5149	72.6289	598.721	1.15629	230.663	323.913	44.1449	877.505
TMG	For	[N+]=C(N(C)C)N(C)C.C(=O)[O-]	0.02	4	180	120	-1	5	3737	62.9849	432.84	1.32222	265.981	90.361	76.4977	877.531
Ch	ZnCl3	C[N+](C)(C)CCO.Cl[Zn-](Cl)Cl	0.02	4	180	180	-1	5	1880	80.0751	355.276	1.39989	209.213	35.7565	110.306	877.582
Ch	Ser	C[N+](C)(C)CCO.C(C(C(=O)[O-])N)O	0.02	4	160	90	-1	5	3200	55.0315	451.125	1.30406	304.421	88.5589	58.1446	877.591
C4TMG	CrCl4	CCCC[N+]=C(N(C)C)N(C)C.Cl[Cr-](Cl)(Cl)Cl	0.02	4	190	120	-1	5	8593	67.208	515.808	1.23977	249.268	194.723	71.8175	877.788
DMIM	ZnCl3	CN1C=C[N+](=C1)C.Cl[Zn-](Cl)Cl	0.02	4	170	90	-1	5	1706	53.7314	419.814	1.3362	311.787	48.3554	59.6708	878.009
TMG	Ac	[N+]=C(N(C)C)N(C)C.CC(=O)[O-]	0.04	4	170	90	-1	5	3427	61.6604	492.982	1.26318	271.694	169.29	51.9976	878.08
TMG	Gly	[N+]=C(N(C)C)N(C)C.C(C(=O)[O-])N	0.02	4	180	120	-1	5	3820	63.0061	434.7	1.32178	265.891	92.3368	76.4719	878.238
N1111	ZnCl3	C[N+](C)(C)C.Cl[Zn-](Cl)Cl	0.02	6	190	90	-1	5	2044	74.4659	432.082	1.32444	337.458	41.8039	52.8198	878.262
N1111	But	C[N+](C)(C)C.CCCC(=O)[O-]	0.02	4	170	120	-1	5	2553	61.8717	411.346	1.34533	270.766	62.8424	77.7373	878.339
TMG	Lys	[N+]=C(N(C)C)N(C)C.C(CCN)CC(C(=O)[O-])N	0.02	4	160	90	-1	5	2912	54.7334	445.568	1.31116	306.079	81.0275	58.4613	878.363
TMG	ZnCl4	[N+]=C(N(C)C)N(C)C.Cl[Zn-2](Cl)(Cl)Cl	0.02	4	190	180	-1	5	3192	81.1826	375.194	1.38155	206.359	59.8817	108.953	878.372
Ch	Gly	C[N+](C)(C)CCO.C(C(=O)[O-])N	0.02	4	170	120	-1	5	2584	61.8887	411.996	1.34496	270.692	63.588	77.7159	878.478
N1111	Pro	C[N+](C)(C)C.CCC(=O)[O-]	0.02	4	170	90	-1	5	10949	61.7105	593.644	1.16343	271.474	270.215	51.9554	878.539
C4TMG	CoCl4	CCCC[N+]=C(N(C)C)N(C)C.Cl[Co-2](Cl)(Cl)Cl	0.02	4	190	90	-1	5	6926	58.2576	523.881	1.23349	287.564	181.061	55.2567	878.688
N1111	Ala	C[N+](C)(C)C.CC(C(=O)[O-])N	0.02	4	180	120	-1	5	3946	63.0802	437.232	1.32022	265.579	95.2705	76.3821	878.728
Ch	ZnCl4	C[N+](C)(C)CCO.Cl[Zn-2](Cl)(Cl)Cl	0.04	4	170	150	-1	5	2102	75.4291	395.557	1.36211	222.1	84.8825	88.5745	878.832
N1111	For	C[N+](C)(C)C.C(=O)[O-]	0.04	4	190	90	-1	5	2691	60.3691	466.606	1.29126	277.506	135.776	53.324	878.934
N2222	OH	CC[N+](CC)(CC)CC.[OH-]	0.02	4	180	120	-1	5	7333	65.9945	496.087	1.26192	253.851	169.226	73.0091	879.005
TMG	ZnCl3	[N+]=C(N(C)C)N(C)C.Cl[Zn-](Cl)Cl	0.08	4	190	120	-1	5	2717	79.4801	479.758	1.27828	210.779	208.25	60.7285	879.021
C4TMG	ZnCl4	CCCC[N+]=C(N(C)C)N(C)C.Cl[Zn-2](Cl)(Cl)Cl	0.06	4	170	90	-1	5	4814	71.6122	585.847	1.1727	233.937	307.138	44.7716	879.276
Ch	ZnCl4	C[N+](C)(C)CCO.Cl[Zn-2](Cl)(Cl)Cl	0.06	4	190	150	-1	5	2102	80.7331	409.48	1.34936	207.508	118.959	83.0137	879.421
TMG	ZnCl3	[N+]=C(N(C)C)N(C)C.Cl[Zn-](Cl)Cl	0.04	4	160	120	-1	5	2717	67.7111	440.548	1.31866	247.416	122.223	70.9093	879.606
N1111	ZnCl4	C[N+](C)(C)C.Cl[Zn-2](Cl)(Cl)Cl	0.1	4	190	90	-1	5	2368	76.2915	498.141	1.26132	219.589	236.358	42.195	879.731
N1111	For	C[N+](C)(C)C.C(=O)[O-]	0.02	4	170	120	-1	5	2691	61.8803	414.685	1.34514	270.729	66.2301	77.7265	879.915
Ch	ZnCl3	C[N+](C)(C)CCO.Cl[Zn-](Cl)Cl	0.12	4	190	90	-1	5	1880	79.248	468.795	1.29114	211.397	216.778	40.6208	879.966
C2TMG	ZnCl3	CC[N+]=C(N(C)C)N(C)C.Cl[Zn-](Cl)Cl	0.04	4	180	150	-1	5	3383	77.5788	435.025	1.32503	215.945	132.826	86.254	880.028
C2TMG	ZnCl4	CC[N+]=C(N(C)C)N(C)C.Cl[Zn-2](Cl)(Cl)Cl	0.08	4	180	90	-1	5	3985	76.3275	579.63	1.18049	219.485	318.054	42.0902	880.06
C8TMG	FeCl4	CCCCCCCC[N+]=C(N(C)C)N(C)C.Cl[Fe-](Cl)(Cl)Cl	0.02	4	180	120	-1	5	5745	64.5368	469.817	1.29043	259.585	135.574	74.6581	880.121
C2TMG	ZnCl4	CC[N+]=C(N(C)C)N(C)C.Cl[Zn-2](Cl)(Cl)Cl	0.04	4	180	150	-1	5	3985	78.5976	452.716	1.30785	213.146	154.434	85.136	880.285
BMIM	ZnCl3	CCCCN1C=C[N+](=C1)C.Cl[Zn-](Cl)Cl	0.02	4	190	120	-1	5	1558	60.9286	393.121	1.36754	274.957	38.944	79.2191	880.33
C4TMG	CoCl3	CCCC[N+]=C(N(C)C)N(C)C.Cl[Co-](Cl)Cl	0.04	4	190	90	-1	5	6951	67.6323	608.354	1.15259	247.704	313.053	47.5974	880.472
EMIM	ZnCl3	CCN1C=C[N+](=C1)C.Cl[Zn-](Cl)Cl	0.02	4	180	150	-1	5	1632	69.6129	372.485	1.38914	240.656	35.7046	96.1242	880.814
N2222	ZnCl4	CC[N+](CC)(CC)CC.Cl[Zn-2](Cl)(Cl)Cl	0.04	4	190	150	-1	5	5149	80.5943	485.622	1.2761	207.865	194.6	83.1567	880.86
Ch	CoCl3	C[N+](C)(C)CCO.Cl[Co-](Cl)Cl	0.02	4	190	120	-1	5	5392	64.2055	464.001	1.29774	260.924	127.9	75.176	880.872
C8TMG	ZnCl3	CCCCCCCC[N+]=C(N(C)C)N(C)C.Cl[Zn-](Cl)Cl	0.04	4	180	120	-1	5	5644	72.7262	532.99	1.22888	230.354	236.385	66.2512	880.936
N1111	Ser	C[N+](C)(C)C.C(C(C(=O)[O-])N)O	0.04	4	170	90	-1	5	3650	61.8383	502.548	1.25954	270.912	179.787	51.848	881.045
Ch	Ala	C[N+](C)(C)CCO.CC(C(=O)[O-])N	0.02	4	160	90	-1	5	3412	54.9982	457.269	1.30485	304.606	94.4831	58.1798	881.057
C8TMG	ZnCl4	CCCCCCCC[N+]=C(N(C)C)N(C)C.Cl[Zn-2](Cl)(Cl)Cl	0.04	4	180	120	-1	5	6559	74.2767	559.387	1.20323	225.545	268.973	64.8682	881.308
TMG	FeCl4	[N+]=C(N(C)C)N(C)C.Cl[Fe-](Cl)(Cl)Cl	0.02	4	180	90	-1	5	3098	54.753	450.818	1.31186	305.97	86.1723	58.6751	881.338
AMIM	ZnCl4	C[N+]1=CN(C=C1)CC=C.Cl[Zn-2](Cl)(Cl)Cl	0.02	4	180	150	-1	5	2047	69.9186	379.896	1.38307	239.604	44.5881	95.7039	881.483
TMG	ZnCl4	[N+]=C(N(C)C)N(C)C.Cl[Zn-2](Cl)(Cl)Cl	0.02	6	190	90	-1	5	3192	75.1598	451.356	1.31222	334.343	64.6802	52.3322	881.786
C6TMG	CoCl3	CCCCCC[N+]=C(N(C)C)N(C)C.Cl[Co-](Cl)Cl	0.04	4	190	90	-1	5	7501	68.4798	625.289	1.13833	244.638	333.642	47.0084	881.808
C2TMG	Lys	CC[N+]=C(N(C)C)N(C)C.C(CCN)CC(C(=O)[O-])N	0.04	4	170	90	-1	5	3619	61.7189	501.991	1.26198	271.437	178.605	51.9484	881.986
DMIM	ZnCl3	CN1C=C[N+](=C1)C.Cl[Zn-](Cl)Cl	0.08	4	190	120	-1	5	1706	75.7202	422.243	1.34176	221.246	137.253	63.744	882
BMIM	ZnCl4	CCCCN1C=C[N+](=C1)C.Cl[Zn-2](Cl)(Cl)Cl	0.02	4	190	120	-1	5	1659	60.8892	395.901	1.36842	275.135	41.4954	79.2703	882.163
EMIM	ZnCl4	CCN1C=C[N+](=C1)C.Cl[Zn-2](Cl)(Cl)Cl	0.08	4	190	120	-1	5	1769	75.9085	426.251	1.33843	220.697	141.968	63.5859	882.339
N2222	ZnCl4	CC[N+](CC)(CC)CC.Cl[Zn-2](Cl)(Cl)Cl	0.06	4	190	120	-1	5	5149	79.6674	566.166	1.19881	210.284	295.296	60.5858	882.488
C2TMG	But	CC[N+]=C(N(C)C)N(C)C.CCCC(=O)[O-]	0.02	4	180	120	-1	5	4231	63.0326	444.448	1.32122	265.78	102.229	76.4398	882.835
C2TMG	Pro	CC[N+]=C(N(C)C)N(C)C.CCC(=O)[O-]	0.02	4	190	90	-1	5	10054	60.6802	581.473	1.18425	276.083	252.34	53.0506	882.86
TMG	Ser	[N+]=C(N(C)C)N(C)C.C(C(C(=O)[O-])N)O	0.02	4	180	120	-1	5	4237	63.0221	444.667	1.32144	265.824	102.39	76.4525	883.054
N2222	ZnCl3	CC[N+](CC)(CC)CC.Cl[Zn-](Cl)Cl	0.06	4	180	120	-1	5	4258	77.2777	530.884	1.23533	216.787	251.748	62.3491	883.11
TMG	Pro	[N+]=C(N(C)C)N(C)C.CCC(=O)[O-]	0.02	4	190	90	-1	5	10073	60.675	582	1.18435	276.107	252.838	53.0551	883.175
Ch	ZnCl3	C[N+](C)(C)CCO.Cl[Zn-](Cl)Cl	0.02	4	160	150	-1	5	1880	69.567	377.862	1.38858	240.815	41.1574	95.8899	883.22
Ch	ZnCl4	C[N+](C)(C)CCO.Cl[Zn-2](Cl)(Cl)Cl	0.02	4	180	180	-1	5	2102	79.7432	360.994	1.40572	210.084	40.1452	110.765	883.355
C2TMG	HCO3	CC[N+]=C(N(C)C)N(C)C.OC([O-])=O	0.02	4	180	120	-1	5	4282	63.0374	445.646	1.32112	265.759	103.453	76.4339	883.382
C8TMG	Pro	CCCCCCCC[N+]=C(N(C)C)N(C)C.CCC(=O)[O-]	0.02	4	170	90	-1	5	11189	61.5788	600.849	1.16592	272.054	276.728	52.0665	883.385
DEIM	MnCl3	CC[N]1C=C[N+](=C1)CC.Cl[Mn-](Cl)Cl	0.02	4	180	90	-1	5	1924	53.6132	427.052	1.33975	312.475	54.6546	59.9225	883.399
AMIM	ZnCl3	C[N+]1=CN(C=C1)CC=C.Cl[Zn-](Cl)Cl	0.04	4	180	120	-1	5	1852	65.9811	412.422	1.35451	253.903	85.4959	73.0239	883.465
C8TMG	CoCl3	CCCCCCCC[N+]=C(N(C)C)N(C)C.Cl[Co-](Cl)Cl	0.02	4	170	90	-1	5	8116	58.9145	548.583	1.21865	284.358	209.804	54.4212	883.616
N1111	Gly	C[N+](C)(C)C.C(C(=O)[O-])N	0.02	4	170	120	-1	5	3001	61.8823	422.301	1.3451	270.72	73.8573	77.724	883.701
C6TMG	ZnCl4	CCCCCC[N+]=C(N(C)C)N(C)C.Cl[Zn-2](Cl)(Cl)Cl	0.02	4	170	150	-1	5	5675	72.8275	440.449	1.32712	230.034	118.676	91.7386	883.783
N1111	ZnCl3	C[N+](C)(C)C.Cl[Zn-](Cl)Cl	0.04	4	170	150	-1	5	2044	74.8962	396.012	1.3718	223.68	83.1276	89.2047	883.905
N1111	Ser	C[N+](C)(C)C.C(C(C(=O)[O-])N)O	0.02	4	160	90	-1	5	3650	55.0181	463.691	1.30437	304.496	101.037	58.1588	884.033
Ch	ZnCl3	C[N+](C)(C)CCO.Cl[Zn-](Cl)Cl	0.1	4	170	90	-1	5	1880	73.7658	464.646	1.30364	227.107	194.074	43.4645	884.141
C2TMG	Ac	CC[N+]=C(N(C)C)N(C)C.CC(=O)[O-]	0.02	4	180	120	-1	5	4361	63.0462	447.492	1.32094	265.722	105.347	76.4232	884.214
Ch	OH	C[N+](C)(C)CCO.[OH-]	0.02	4	170	120	-1	5	2579	61.4793	414.616	1.35392	272.494	63.8876	78.2335	884.267
N1111	ZnCl3	C[N+](C)(C)C.Cl[Zn-](Cl)Cl	0.06	4	190	150	-1	5	2044	80.1409	409.2	1.35933	209.041	116.531	83.6272	884.267
C2TMG	NiCl4	CC[N+]=C(N(C)C)N(C)C.Cl[Ni-2](Cl)(Cl)Cl	0.02	4	190	90	-1	5	6288	57.3369	515.347	1.2533	292.181	167.022	56.144	884.324
C6TMG	MnCl3	CCCCCC[N+]=C(N(C)C)N(C)C.Cl[Mn-](Cl)Cl	0.04	4	180	90	-1	5	5048	64.0203	552.034	1.21712	261.679	240.174	50.1815	884.575
C4TMG	MnCl3	CCCC[N+]=C(N(C)C)N(C)C.Cl[Mn-](Cl)Cl	0.02	4	170	90	-1	5	4284	55.5461	476.782	1.29255	301.601	117.46	57.7213	884.666
Ch	HCO3	C[N+](C)(C)CCO.OC([O-])=O	0.02	4	190	120	-1	5	1984	60.9944	403.333	1.36607	274.661	49.5388	79.1337	884.699
DMIM	MnCl3	CN1C=C[N+](=C1)C.Cl[Mn-](Cl)Cl	0.02	4	190	150	-1	5	1851	69.5247	377.905	1.39165	240.961	40.5472	96.3968	884.78
C4TMG	Lys	CCCC[N+]=C(N(C)C)N(C)C.C(CCN)CC(C(=O)[O-])N	0.02	4	180	120	-1	5	4371	63.0133	447.967	1.32162	265.861	105.643	76.4631	884.796
C4TMG	ZnCl3	CCCC[N+]=C(N(C)C)N(C)C.Cl[Zn-](Cl)Cl	0.06	4	190	120	-1	5	4096	76.7391	525.076	1.24456	218.308	243.87	62.8977	884.817
TMG	Lys	[N+]=C(N(C)C)N(C)C.C(CCN)CC(C(=O)[O-])N	0.02	4	170	120	-1	5	2912	61.7242	421.187	1.34855	271.413	71.8505	77.9231	884.866
C8TMG	CoCl3	CCCCCCCC[N+]=C(N(C)C)N(C)C.Cl[Co-](Cl)Cl	0.02	4	180	120	-1	5	8116	66.2194	512.41	1.25764	252.989	186.66	72.7611	885.024
C2TMG	But	CC[N+]=C(N(C)C)N(C)C.CCCC(=O)[O-]	0.04	4	180	90	-1	5	4231	62.578	524.991	1.24517	267.71	205.942	51.3381	885.079
Ch	OH	C[N+](C)(C)CCO.[OH-]	0.06	4	180	90	-1	5	2579	65.3889	485.537	1.2848	256.202	180.203	49.1312	885.171
EMIM	ZnCl3	CCN1C=C[N+](=C1)C.Cl[Zn-](Cl)Cl	0.02	4	190	180	-1	5	1632	79.213	354.53	1.4159	211.49	31.3775	111.662	885.216
TMG	Ser	[N+]=C(N(C)C)N(C)C.C(C(C(=O)[O-])N)O	0.04	4	180	90	-1	5	4237	62.5681	525.365	1.24536	267.752	206.267	51.3462	885.364
C4TMG	MnCl3	CCCC[N+]=C(N(C)C)N(C)C.Cl[Mn-](Cl)Cl	0.04	4	180	90	-1	5	4284	62.6489	526.973	1.24376	267.407	208.286	51.28	885.365
TMG	But	[N+]=C(N(C)C)N(C)C.CCCC(=O)[O-]	0.02	4	160	90	-1	5	3408	54.7271	459.423	1.31131	306.115	94.8399	58.4681	885.367
TMG	Lys	[N+]=C(N(C)C)N(C)C.C(CCN)CC(C(=O)[O-])N	0.04	4	190	90	-1	5	2912	60.3048	478.266	1.29264	277.802	147.083	53.3808	885.452
AMIM	ZnCl3	C[N+]1=CN(C=C1)CC=C.Cl[Zn-](Cl)Cl	0.06	4	180	90	-1	5	1852	63.4766	447.836	1.32351	263.92	133.304	50.6114	885.673
N2222	FeCl4	CC[N+](CC)(CC)CC.Cl[Fe-](Cl)(Cl)Cl	0.04	4	190	90	-1	5	4499	63.0172	534.389	1.237	265.845	217.461	51.0833	885.695
C4TMG	Pro	CCCC[N+]=C(N(C)C)N(C)C.CCC(=O)[O-]	0.02	4	190	90	-1	5	10289	60.6806	587.368	1.18424	276.081	258.236	53.0503	885.804
Ch	Ac	C[N+](C)(C)CCO.CC(=O)[O-]	0.02	4	190	120	-1	5	2054	60.976	405.203	1.36648	274.744	51.3021	79.1575	885.84
DMIM	ZnCl4	CN1C=C[N+](=C1)C.Cl[Zn-2](Cl)(Cl)Cl	0.08	4	190	120	-1	5	1877	75.9788	434.516	1.33719	220.493	150.496	63.527	885.853
TMG	HCO3	[N+]=C(N(C)C)N(C)C.OC([O-])=O	0.02	4	160	90	-1	5	3346	54.6411	458.418	1.31338	306.597	93.2612	58.5601	885.897
Ch	Ser	C[N+](C)(C)CCO.C(C(C(=O)[O-])N)O	0.02	4	170	120	-1	5	3200	61.8971	427.097	1.34478	270.655	78.736	77.7054	885.937
Ch	Lys	C[N+](C)(C)CCO.C(CCN)CC(C(=O)[O-])N	0.02	4	190	120	-1	5	1993	60.9065	404.14	1.36804	275.057	49.8353	79.2478	886.088
TMG	For	[N+]=C(N(C)C)N(C)C.C(=O)[O-]	0.04	4	170	90	-1	5	3737	61.6348	508.507	1.2637	271.807	184.68	52.0192	886.104
DMIM	Fe2Cl6O	CN1C=C[N+](=C1)C.Cl[Fe-](Cl)(Cl)O[Fe-](Cl)(Cl)Cl	0.02	4	190	90	-1	5	2218	53.7235	434.63	1.3376	311.833	62.8769	59.9201	886.113
TMG	Ac	[N+]=C(N(C)C)N(C)C.CC(=O)[O-]	0.02	4	160	90	-1	5	3427	54.6968	460.206	1.31204	306.284	95.4215	58.5005	886.122
C6TMG	OH	CCCCCC[N+]=C(N(C)C)N(C)C.[OH-]	0.02	4	180	120	-1	5	7371	65.4937	500.763	1.27157	255.792	171.404	73.5673	886.168
DMIM	FeCl4	CN1C=C[N+](=C1)C.Cl[Fe-](Cl)(Cl)Cl	0.02	4	180	90	-1	5	2198	53.6753	434.333	1.3382	312.114	62.366	59.8532	886.266
C2TMG	HCO3	CC[N+]=C(N(C)C)N(C)C.OC([O-])=O	0.04	4	180	90	-1	5	4282	62.5811	527.447	1.24511	267.697	208.414	51.3356	886.276
Ch	ZnCl3	C[N+](C)(C)CCO.Cl[Zn-](Cl)Cl	0.06	4	180	150	-1	5	1880	79.4745	403.071	1.37008	210.794	108.08	84.1966	886.573
N1111	ZnCl4	C[N+](C)(C)C.Cl[Zn-2](Cl)(Cl)Cl	0.08	4	190	120	-1	5	2368	77.6026	463.968	1.30921	215.879	185.891	62.1978	886.589
C2TMG	Lys	CC[N+]=C(N(C)C)N(C)C.C(CCN)CC(C(=O)[O-])N	0.02	4	160	90	-1	5	3619	54.8274	464.444	1.30891	305.555	100.528	58.3611	886.678
TMG	Ala	[N+]=C(N(C)C)N(C)C.CC(C(=O)[O-])N	0.02	4	180	120	-1	5	4521	63.0048	451.654	1.3218	265.897	109.284	76.4734	886.728
DEIM	FeCl4	CC[N]1C=C[N+](=C1)CC.Cl[Fe-](Cl)(Cl)Cl	0.02	4	190	150	-1	5	2233	69.6972	385.317	1.38821	240.365	48.7941	96.1582	886.764
N1111	Gly	C[N+](C)(C)C.C(C(=O)[O-])N	0.04	4	190	90	-1	5	3001	60.3606	482.315	1.29144	277.545	151.438	53.3315	886.879
N2222	Lys	CC[N+](CC)(CC)CC.C(CCN)CC(C(=O)[O-])N	0.02	4	180	120	-1	5	4590	63.0284	453.152	1.32131	265.797	110.91	76.4449	887.231
Ch	CoCl3	C[N+](C)(C)CCO.Cl[Co-](Cl)Cl	0.02	4	180	90	-1	5	5392	56.3569	499.98	1.27452	297.262	145.712	57.0052	887.251
C4TMG	ZnCl4	CCCC[N+]=C(N(C)C)N(C)C.Cl[Zn-2](Cl)(Cl)Cl	0.06	4	190	120	-1	5	4814	78.377	555.958	1.21855	213.746	280.629	61.5832	887.253
DMIM	ZnCl4	CN1C=C[N+](=C1)C.Cl[Zn-2](Cl)(Cl)Cl	0.06	4	190	150	-1	5	1877	79.4223	403.295	1.37163	210.933	107.978	84.3839	887.464
EMIM	ZnCl3	CCN1C=C[N+](=C1)C.Cl[Zn-](Cl)Cl	0.08	4	190	120	-1	5	1632	74.9915	420.334	1.35479	223.395	132.575	64.3634	887.564
TMG	Gly	[N+]=C(N(C)C)N(C)C.C(C(=O)[O-])N	0.04	4	170	90	-1	5	3820	61.6752	512.273	1.26287	271.629	188.659	51.9852	887.574
C2TMG	Gly	CC[N+]=C(N(C)C)N(C)C.C(C(=O)[O-])N	0.02	4	180	120	-1	5	4637	63.0413	454.195	1.32104	265.743	112.023	76.4292	887.617
C2TMG	CoCl3	CC[N+]=C(N(C)C)N(C)C.Cl[Co-](Cl)Cl	0.04	4	190	90	-1	5	6482	66.2796	599.216	1.17611	252.759	297.888	48.5688	887.665
C2TMG	ZnCl4	CC[N+]=C(N(C)C)N(C)C.Cl[Zn-2](Cl)(Cl)Cl	0.02	4	190	180	-1	5	3985	80.9989	390.956	1.38468	206.827	74.9279	109.2	887.819
C6TMG	FeCl4	CCCCCC[N+]=C(N(C)C)N(C)C.Cl[Fe-](Cl)(Cl)Cl	0.02	4	180	120	-1	5	5013	63.3344	461.134	1.31493	264.513	120.546	76.0755	888.03
TMG	ZnCl4	[N+]=C(N(C)C)N(C)C.Cl[Zn-2](Cl)(Cl)Cl	0.06	4	170	120	-1	5	3192	74.0736	487.982	1.2882	226.164	196.886	64.9319	888.091
C2TMG	Ac	CC[N+]=C(N(C)C)N(C)C.CC(=O)[O-]	0.04	4	180	90	-1	5	4361	62.5855	531.254	1.24502	267.678	212.244	51.332	888.136
AMIM	ZnCl4	C[N+]1=CN(C=C1)CC=C.Cl[Zn-2](Cl)(Cl)Cl	0.06	4	180	90	-1	5	2047	63.7978	459.546	1.31685	262.592	146.598	50.3566	888.197
C6TMG	ZnCl3	CCCCCC[N+]=C(N(C)C)N(C)C.Cl[Zn-](Cl)Cl	0.04	4	170	120	-1	5	4853	70.7431	513.754	1.26274	236.811	208.954	67.9888	888.245
Ch	For	C[N+](C)(C)CCO.C(=O)[O-]	0.02	4	190	120	-1	5	2256	60.9774	410.239	1.36645	274.737	56.3462	79.1557	888.343
C2TMG	For	CC[N+]=C(N(C)C)N(C)C.C(=O)[O-]	0.02	4	180	120	-1	5	4693	63.0324	455.612	1.32122	265.78	113.391	76.4399	888.418
Ch	But	C[N+](C)(C)CCO.CCCC(=O)[O-]	0.02	4	190	120	-1	5	2235	60.9485	409.909	1.36709	274.868	55.8481	79.1932	888.501
N1111	Ala	C[N+](C)(C)C.CC(C(=O)[O-])N	0.04	4	170	90	-1	5	3946	61.8214	517.269	1.25989	270.986	194.42	51.8622	888.578
N1111	Ala	C[N+](C)(C)C.CC(C(=O)[O-])N	0.02	4	160	90	-1	5	3946	54.9903	472.124	1.30503	304.65	109.286	58.1882	888.58
C2TMG	ZnCl4	CC[N+]=C(N(C)C)N(C)C.Cl[Zn-2](Cl)(Cl)Cl	0.02	6	190	90	-1	5	3985	75.2618	466.791	1.31044	333.89	80.6395	52.2613	888.614
C4TMG	Lys	CCCC[N+]=C(N(C)C)N(C)C.C(CCN)CC(C(=O)[O-])N	0.04	4	180	90	-1	5	4371	62.5648	531.917	1.24543	267.767	212.801	51.3489	888.673
C8TMG	FeCl4	CCCCCCCC[N+]=C(N(C)C)N(C)C.Cl[Fe-](Cl)(Cl)Cl	0.02	4	170	90	-1	5	5745	56.5475	507.688	1.26966	296.26	154.729	56.6991	888.674
N1111	HCO3	C[N+](C)(C)C.OC([O-])=O	0.02	4	190	120	-1	5	2307	60.9973	411.379	1.366	274.648	57.6012	79.1299	888.69
N1111	Lys	C[N+](C)(C)C.C(CCN)CC(C(=O)[O-])N	0.02	4	190	120	-1	5	2193	60.8934	409.229	1.36833	275.116	54.8482	79.2649	888.78
Ch	Ala	C[N+](C)(C)CCO.CC(C(=O)[O-])N	0.02	4	170	120	-1	5	3412	61.8786	432.442	1.34518	270.736	83.9774	77.7287	888.812
C6TMG	ZnCl3	CCCCCC[N+]=C(N(C)C)N(C)C.Cl[Zn-](Cl)Cl	0.04	4	160	90	-1	5	4853	63.3367	548.412	1.22924	264.504	233.388	50.5203	888.827
C8TMG	CoCl3	CCCCCCCC[N+]=C(N(C)C)N(C)C.Cl[Co-](Cl)Cl	0.04	4	190	90	-1	5	8116	68.9857	647.857	1.12998	242.844	358.35	46.6636	888.918
Ch	OH	C[N+](C)(C)CCO.[OH-]	0.04	4	190	120	-1	5	2579	66.848	440.328	1.33758	250.61	117.513	72.2043	888.952
N1111	ZnCl4	C[N+](C)(C)C.Cl[Zn-2](Cl)(Cl)Cl	0.02	4	190	180	-1	5	2368	79.4898	367.397	1.41097	210.754	45.3695	111.274	889.183
N2222	Pro	CC[N+](CC)(CC)CC.CCC(=O)[O-]	0.02	4	170	90	-1	5	11780	61.6833	614.424	1.16395	271.593	290.852	51.9783	889.185
C4TMG	ZnCl4	CCCC[N+]=C(N(C)C)N(C)C.Cl[Zn-2](Cl)(Cl)Cl	0.04	4	190	150	-1	5	4814	79.2587	480.931	1.2976	211.368	185.005	84.558	889.266
N2222	ZnCl3	CC[N+](CC)(CC)CC.Cl[Zn-](Cl)Cl	0.04	4	180	150	-1	5	4258	78.2681	465.247	1.31336	214.044	165.709	85.4944	889.303
N1111	ZnCl3	C[N+](C)(C)C.Cl[Zn-](Cl)Cl	0.02	4	180	180	-1	5	2044	79.1565	362.554	1.41613	211.641	39.3268	111.586	889.344
EMIM	ZnCl4	CCN1C=C[N+](=C1)C.Cl[Zn-2](Cl)(Cl)Cl	0.02	4	170	90	-1	5	1769	53.0905	426.689	1.35233	315.551	50.7464	60.3911	889.512
EMIM	ZnCl4	CCN1C=C[N+](=C1)C.Cl[Zn-2](Cl)(Cl)Cl	0.06	4	190	150	-1	5	1769	78.9572	399.421	1.37971	212.175	102.365	84.8809	889.566
Ch	ZnCl4	C[N+](C)(C)CCO.Cl[Zn-2](Cl)(Cl)Cl	0.02	4	160	150	-1	5	2102	69.2484	384.483	1.39497	241.923	46.2293	96.3311	889.725
C2TMG	MnCl3	CC[N+]=C(N(C)C)N(C)C.Cl[Mn-](Cl)Cl	0.02	4	180	120	-1	5	3564	61.9632	435.724	1.34402	270.367	87.5988	77.759	889.874
C6TMG	CoCl3	CCCCCC[N+]=C(N(C)C)N(C)C.Cl[Co-](Cl)Cl	0.02	4	180	120	-1	5	7501	65.3263	505.078	1.27483	256.448	174.874	73.7559	889.955
C8TMG	ZnCl3	CCCCCCCC[N+]=C(N(C)C)N(C)C.Cl[Zn-](Cl)Cl	0.06	4	190	90	-1	5	5644	72.9264	627.468	1.15245	229.722	353.604	44.142	889.96
C8TMG	MnCl3	CCCCCCCC[N+]=C(N(C)C)N(C)C.Cl[Mn-](Cl)Cl	0.04	4	180	90	-1	5	5846	64.9907	581.192	1.19894	257.772	273.988	49.4323	890.067
N1111	Ac	C[N+](C)(C)C.CC(=O)[O-]	0.02	4	190	120	-1	5	2398	60.9769	413.789	1.36646	274.74	59.8932	79.1564	890.123
N1111	MnCl3	C[N+](C)(C)C.Cl[Mn-](Cl)Cl	0.04	4	190	90	-1	5	2219	58.781	454.754	1.32615	285.003	114.986	54.7647	890.452
TMG	ZnCl4	[N+]=C(N(C)C)N(C)C.Cl[Zn-2](Cl)(Cl)Cl	0.04	4	160	120	-1	5	3192	67.6973	462.01	1.31893	247.466	143.62	70.9237	890.47
N1111	OH	C[N+](C)(C)C.[OH-]	0.06	4	190	90	-1	5	3254	66.748	521.952	1.25913	250.985	222.738	48.228	890.54
C2TMG	Ser	CC[N+]=C(N(C)C)N(C)C.C(C(C(=O)[O-])N)O	0.02	4	180	120	-1	5	4906	63.0483	460.642	1.32089	265.713	118.508	76.4207	890.767
TMG	HCO3	[N+]=C(N(C)C)N(C)C.OC([O-])=O	0.02	4	170	120	-1	5	3346	61.6837	432.179	1.34943	271.592	82.6132	77.9743	890.806
TMG	But	[N+]=C(N(C)C)N(C)C.CCCC(=O)[O-]	0.02	4	170	120	-1	5	3408	61.728	433.399	1.34846	271.397	84.0837	77.9184	890.931
C6TMG	Pro	CCCCCC[N+]=C(N(C)C)N(C)C.CCC(=O)[O-]	0.02	4	190	90	-1	5	10682	60.6636	597.399	1.18457	276.159	268.175	53.0651	890.985
C2TMG	CrCl4	CC[N+]=C(N(C)C)N(C)C.Cl[Cr-](Cl)(Cl)Cl	0.02	4	190	120	-1	5	8300	65.9548	518.844	1.26333	254.004	191.658	73.1821	891.085
C6TMG	ZnCl4	CCCCCC[N+]=C(N(C)C)N(C)C.Cl[Zn-2](Cl)(Cl)Cl	0.04	4	170	120	-1	5	5675	71.9219	540.146	1.24204	232.93	240.342	66.8746	891.093
C4TMG	ZnCl3	CCCC[N+]=C(N(C)C)N(C)C.Cl[Zn-](Cl)Cl	0.08	4	190	90	-1	5	4096	75.7795	592.83	1.18945	221.073	329.278	42.4801	891.142
TMG	For	[N+]=C(N(C)C)N(C)C.C(=O)[O-]	0.02	4	160	90	-1	5	3737	54.652	469.222	1.31311	306.536	104.138	58.5484	891.168
N1111	ZnCl3	C[N+](C)(C)C.Cl[Zn-](Cl)Cl	0.02	4	160	150	-1	5	2044	69.0814	384.134	1.39834	242.508	45.0623	96.564	891.237
Ch	ZnCl3	C[N+](C)(C)CCO.Cl[Zn-](Cl)Cl	0.02	6	180	90	-1	5	1880	73.2073	435.971	1.34658	343.26	39.1109	53.5999	891.274
TMG	Gly	[N+]=C(N(C)C)N(C)C.C(C(=O)[O-])N	0.02	4	160	90	-1	5	3820	54.7162	470.982	1.31157	306.176	106.326	58.4797	891.277
TMG	Ac	[N+]=C(N(C)C)N(C)C.CC(=O)[O-]	0.02	4	170	120	-1	5	3427	61.711	433.987	1.34883	271.471	84.5757	77.9398	891.411
C2TMG	CrCl4	CC[N+]=C(N(C)C)N(C)C.Cl[Cr-](Cl)(Cl)Cl	0.02	4	180	90	-1	5	8300	58.5756	556.65	1.22625	286.002	215.802	54.846	891.448
DMIM	ZnCl3	CN1C=C[N+](=C1)C.Cl[Zn-](Cl)Cl	0.1	4	190	90	-1	5	1706	72.4595	454.915	1.32803	231.202	179.287	44.4265	891.47
TMG	ZnCl3	[N+]=C(N(C)C)N(C)C.Cl[Zn-](Cl)Cl	0.02	4	180	180	-1	5	2717	79.5351	373.715	1.40939	210.634	52.0265	111.055	891.554
N1111	Ser	C[N+](C)(C)C.C(C(C(=O)[O-])N)O	0.02	4	170	120	-1	5	3650	61.8893	438.224	1.34495	270.689	89.8196	77.7152	891.586
TMG	ZnCl3	[N+]=C(N(C)C)N(C)C.Cl[Zn-](Cl)Cl	0.04	4	170	150	-1	5	2717	75.3942	420.586	1.36274	222.202	109.768	88.6154	891.661
EMIM	OH	CCN1C=C[N+](=C1)C.[OH-]	0.02	4	190	90	-1	5	1995	53.1939	432.573	1.35091	314.938	57.1183	60.5167	891.743
DMIM	ZnCl3	CN1C=C[N+](=C1)C.Cl[Zn-](Cl)Cl	0.02	6	190	90	-1	5	1706	73.046	433.434	1.35019	344.018	35.5694	53.8466	891.812
C6TMG	ZnCl3	CCCCCC[N+]=C(N(C)C)N(C)C.Cl[Zn-](Cl)Cl	0.02	4	170	150	-1	5	4853	71.468	431.31	1.35236	234.409	103.417	93.4836	891.835
Ch	Ser	C[N+](C)(C)CCO.C(C(C(=O)[O-])N)O	0.04	4	190	90	-1	5	3200	60.3558	492.396	1.29155	277.567	161.494	53.3358	891.972
TMG	ZnCl4	[N+]=C(N(C)C)N(C)C.Cl[Zn-2](Cl)(Cl)Cl	0.08	4	170	90	-1	5	3192	72.5733	542.959	1.24112	230.839	267.941	44.1787	892.037
TMG	ZnCl3	[N+]=C(N(C)C)N(C)C.Cl[Zn-](Cl)Cl	0.1	4	180	90	-1	5	2717	76.7034	530.03	1.25413	218.41	269.736	41.8839	892.078
EMIM	ZnCl3	CCN1C=C[N+](=C1)C.Cl[Zn-](Cl)Cl	0.1	4	190	90	-1	5	1632	72.0723	449.54	1.33516	232.444	172.431	44.6652	892.35
N1111	But	C[N+](C)(C)C.CCCC(=O)[O-]	0.02	4	190	120	-1	5	2553	60.9485	417.855	1.36709	274.868	63.7943	79.1933	892.475
EMIM	MnCl3	CCN1C=C[N+](=C1)C.Cl[Mn-](Cl)Cl	0.02	4	190	150	-1	5	1767	68.8506	379.748	1.40528	243.321	39.0862	97.3407	892.514
TMG	Ala	[N+]=C(N(C)C)N(C)C.CC(C(=O)[O-])N	0.04	4	180	90	-1	5	4521	62.5504	539.344	1.24572	267.828	220.155	51.3608	892.53
Ch	Gly	C[N+](C)(C)CCO.C(C(=O)[O-])N	0.02	4	190	120	-1	5	2584	60.9709	418.476	1.36659	274.767	64.5452	79.1641	892.533
AMIM	FeCl4	C[N+]1=CN(C=C1)CC=C.Cl[Fe-](Cl)(Cl)Cl	0.02	4	190	150	-1	5	2292	69.2796	388.937	1.39658	241.814	50.3852	96.7378	892.757
Ch	Asp	C[N+](C)(C)CCO.C(C(C(=O)[O-])N)C(=O)O	0.02	4	180	120	-1	5	5125	63.0815	465.687	1.3202	265.573	123.733	76.3804	892.941
C2TMG	Lys	CC[N+]=C(N(C)C)N(C)C.C(CCN)CC(C(=O)[O-])N	0.02	4	170	120	-1	5	3619	61.7689	438.314	1.34757	271.217	89.2304	77.8667	892.942
C4TMG	But	CCCC[N+]=C(N(C)C)N(C)C.CCCC(=O)[O-]	0.02	4	180	120	-1	5	5086	63.0396	465.054	1.32107	265.75	122.873	76.4312	893.064
C2TMG	ZnCl3	CC[N+]=C(N(C)C)N(C)C.Cl[Zn-](Cl)Cl	0.02	6	190	90	-1	5	3383	74.3625	460.106	1.32628	337.928	69.2854	52.8933	893.195
DMIM	ZnCl3	CN1C=C[N+](=C1)C.Cl[Zn-](Cl)Cl	0.06	4	190	150	-1	5	1706	78.4733	398.216	1.38822	213.484	99.3282	85.4044	893.219
N2222	ZnCl3	CC[N+](CC)(CC)CC.Cl[Zn-](Cl)Cl	0.08	4	180	90	-1	5	4258	76.1269	603.004	1.1836	220.064	340.739	42.2011	893.303
EMIM	MnCl3	CCN1C=C[N+](=C1)C.Cl[Mn-](Cl)Cl	0.08	4	190	90	-1	5	1767	67.6396	454.413	1.33259	247.677	159.144	47.5923	893.504
N2222	Lys	CC[N+](CC)(CC)CC.C(CCN)CC(C(=O)[O-])N	0.04	4	180	90	-1	5	4590	62.585	542.404	1.24503	267.68	223.391	51.3324	893.716
N1111	For	C[N+](C)(C)C.C(=O)[O-]	0.02	4	190	120	-1	5	2691	60.9712	421.147	1.36658	274.765	67.2176	79.1637	893.866
N1111	Pro	C[N+](C)(C)C.CCC(=O)[O-]	0.02	4	190	90	-1	5	10949	60.6905	603.834	1.18405	276.036	274.756	53.0416	893.941
EMIM	Fe2Cl6O	CCN1C=C[N+](=C1)C.Cl[Fe-](Cl)(Cl)O[Fe-](Cl)(Cl)Cl	0.02	4	190	90	-1	5	2119	53.1666	436.347	1.35161	315.099	60.6996	60.5478	893.977
EMIM	ZnCl4	CCN1C=C[N+](=C1)C.Cl[Zn-2](Cl)(Cl)Cl	0.02	6	190	90	-1	5	1769	72.9149	435.529	1.35262	344.637	36.9492	53.9434	894.073
DEIM	NiCl4	CC[N]1C=C[N+](=C1)CC.Cl[Ni-2](Cl)(Cl)Cl	0.02	4	190	150	-1	5	4423	70.9853	425.312	1.36302	236.003	94.8948	94.4133	894.166
DMIM	ZnCl4	CN1C=C[N+](=C1)C.Cl[Zn-2](Cl)(Cl)Cl	0.02	4	170	90	-1	5	1877	52.9023	431.316	1.35714	316.674	54.0361	60.6059	894.23
N2222	ZnCl4	CC[N+](CC)(CC)CC.Cl[Zn-2](Cl)(Cl)Cl	0.02	4	190	180	-1	5	5149	81.4093	410.76	1.3777	205.785	96.3259	108.65	894.231
N2222	ZnCl3	CC[N+](CC)(CC)CC.Cl[Zn-](Cl)Cl	0.02	6	190	90	-1	5	4258	75.0157	473.864	1.31474	334.985	86.4465	52.4327	894.3
C4TMG	ZnCl3	CCCC[N+]=C(N(C)C)N(C)C.Cl[Zn-](Cl)Cl	0.04	4	190	150	-1	5	4096	77.5845	463.12	1.3256	215.929	160.808	86.3827	894.362
C6TMG	OH	CCCCCC[N+]=C(N(C)C)N(C)C.[OH-]	0.02	4	190	120	-1	5	7371	64.9205	505.316	1.28345	258.05	172.917	74.348	894.384
C8TMG	ZnCl4	CCCCCCCC[N+]=C(N(C)C)N(C)C.Cl[Zn-2](Cl)(Cl)Cl	0.02	4	160	120	-1	5	6559	64.1443	491.756	1.29701	261.173	155.73	74.8522	894.385
N1111	ZnCl4	C[N+](C)(C)C.Cl[Zn-2](Cl)(Cl)Cl	0.08	4	170	90	-1	5	2368	69.5764	494.2	1.29458	240.783	207.336	46.0817	894.388
C6TMG	Lys	CCCCCC[N+]=C(N(C)C)N(C)C.C(CCN)CC(C(=O)[O-])N	0.02	4	180	120	-1	5	5164	63.0088	467.167	1.32172	265.88	124.819	76.4686	894.444
Ch	ZnCl3	C[N+](C)(C)CCO.Cl[Zn-](Cl)Cl	0.1	4	190	120	-1	5	1880	80.2624	447.227	1.34172	208.725	178.365	60.1366	894.475
AMIM	NiCl4	C[N+]1=CN(C=C1)CC=C.Cl[Ni-2](Cl)(Cl)Cl	0.02	4	190	150	-1	5	4528	71.049	427.181	1.3618	235.792	97.0605	94.3287	894.49
C2TMG	Ala	CC[N+]=C(N(C)C)N(C)C.CC(C(=O)[O-])N	0.02	4	180	120	-1	5	5200	63.036	467.835	1.32115	265.765	125.634	76.4356	894.492
TMG	ZnCl4	[N+]=C(N(C)C)N(C)C.Cl[Zn-2](Cl)(Cl)Cl	0.1	4	190	90	-1	5	3192	78.5283	563.856	1.22539	213.334	309.528	40.9931	894.624
C4TMG	HCO3	CCCC[N+]=C(N(C)C)N(C)C.OC([O-])=O	0.02	4	180	120	-1	5	5227	63.0425	468.439	1.32101	265.738	126.274	76.4277	894.726
Ch	ZnCl3	C[N+](C)(C)CCO.Cl[Zn-](Cl)Cl	0.08	4	170	120	-1	5	1880	75.1776	439.164	1.35032	222.843	152.343	63.9784	894.741
C2TMG	ZnCl3	CC[N+]=C(N(C)C)N(C)C.Cl[Zn-](Cl)Cl	0.02	4	190	180	-1	5	3383	79.8593	385.054	1.40444	209.779	64.5165	110.759	894.748
TMG	ZnCl4	[N+]=C(N(C)C)N(C)C.Cl[Zn-2](Cl)(Cl)Cl	0.02	4	180	180	-1	5	3192	79.6472	382.272	1.40741	210.337	61.036	110.898	894.84
C2TMG	Gly	CC[N+]=C(N(C)C)N(C)C.C(C(=O)[O-])N	0.04	4	180	90	-1	5	4637	62.5846	544.695	1.24503	267.682	225.68	51.3327	894.865
TMG	ZnCl4	[N+]=C(N(C)C)N(C)C.Cl[Zn-2](Cl)(Cl)Cl	0.06	4	160	90	-1	5	3192	66.1969	521.725	1.26816	253.075	220.313	48.3374	894.941
DEIM	ZnCl4	CC[N]1C=C[N+](=C1)CC.Cl[Zn-2](Cl)(Cl)Cl	0.08	4	190	120	-1	5	1966	75.5027	444.437	1.34562	221.883	158.626	63.9277	895.03
C2TMG	But	CC[N+]=C(N(C)C)N(C)C.CCCC(=O)[O-]	0.02	4	160	90	-1	5	4231	54.8301	481.419	1.30885	305.54	117.522	58.3582	895.133
N1111	OH	C[N+](C)(C)C.[OH-]	0.04	4	190	120	-1	5	3254	67.5318	466.314	1.32403	248.072	146.769	71.4732	895.173
C8TMG	ZnCl4	CCCCCCCC[N+]=C(N(C)C)N(C)C.Cl[Zn-2](Cl)(Cl)Cl	0.06	4	190	90	-1	5	6559	74.8324	667.352	1.1231	223.871	400.464	43.0177	895.226
N2222	ZnCl3	CC[N+](CC)(CC)CC.Cl[Zn-](Cl)Cl	0.02	4	190	180	-1	5	4258	80.5533	398.28	1.39234	207.971	80.5038	109.804	895.311
TMG	HCO3	[N+]=C(N(C)C)N(C)C.OC([O-])=O	0.04	4	190	90	-1	5	3346	60.3771	499.588	1.29109	277.469	168.802	53.3169	895.339
C2TMG	MnCl3	CC[N+]=C(N(C)C)N(C)C.Cl[Mn-](Cl)Cl	0.04	4	180	90	-1	5	3564	60.7253	507.551	1.28316	275.878	178.769	52.9044	895.353
C6TMG	CoCl3	CCCCCC[N+]=C(N(C)C)N(C)C.Cl[Co-](Cl)Cl	0.02	4	170	90	-1	5	7501	57.6116	544.731	1.24621	290.788	198.291	55.6519	895.47
N1111	Ala	C[N+](C)(C)C.CC(C(=O)[O-])N	0.02	4	170	120	-1	5	3946	61.8721	445.632	1.34532	270.764	97.1306	77.7368	895.477
TMG	ZnCl4	[N+]=C(N(C)C)N(C)C.Cl[Zn-2](Cl)(Cl)Cl	0.08	4	190	120	-1	5	3192	79.6263	515.218	1.27594	210.392	244.208	60.617	895.577
TMG	For	[N+]=C(N(C)C)N(C)C.C(=O)[O-]	0.02	4	170	120	-1	5	3737	61.6869	441.81	1.34936	271.577	92.2622	77.9702	895.585
C4TMG	Ac	CCCC[N+]=C(N(C)C)N(C)C.CC(=O)[O-]	0.02	4	180	120	-1	5	5305	63.0469	470.291	1.32092	265.719	128.149	76.4224	895.606
N1111	MnCl3	C[N+](C)(C)C.Cl[Mn-](Cl)Cl	0.02	4	190	120	-1	5	2219	60.4394	412.959	1.37861	277.183	55.9154	79.8604	895.785
EMIM	CoCl4	CCN1C=C[N+](=C1)C.Cl[Co-2](Cl)(Cl)Cl	0.04	4	180	90	-1	5	4435	62.1679	538.449	1.25338	269.476	217.296	51.6768	895.915
EMIM	ZnCl3	CCN1C=C[N+](=C1)C.Cl[Zn-](Cl)Cl	0.02	6	190	90	-1	5	1632	72.6437	434.283	1.35766	345.923	34.215	54.1447	895.974
TMG	Gly	[N+]=C(N(C)C)N(C)C.C(C(=O)[O-])N	0.02	4	170	120	-1	5	3820	61.7242	443.591	1.34855	271.413	94.2544	77.9231	896.068
N2222	ZnCl4	CC[N+](CC)(CC)CC.Cl[Zn-2](Cl)(Cl)Cl	0.02	6	190	90	-1	5	5149	75.6221	488.009	1.30419	332.299	103.698	52.0123	896.102
TMG	Ser	[N+]=C(N(C)C)N(C)C.C(C(C(=O)[O-])N)O	0.02	4	160	90	-1	5	4237	54.7732	482.086	1.31021	305.857	117.811	58.4188	896.146
N1111	ZnCl4	C[N+](C)(C)C.Cl[Zn-2](Cl)(Cl)Cl	0.06	4	170	120	-1	5	2368	71.307	454.117	1.33818	234.939	151.728	67.4512	896.15
C2TMG	For	CC[N+]=C(N(C)C)N(C)C.C(=O)[O-]	0.04	4	180	90	-1	5	4693	62.5788	547.471	1.24515	267.707	228.427	51.3375	896.311
Ch	ZnCl4	C[N+](C)(C)CCO.Cl[Zn-2](Cl)(Cl)Cl	0.12	4	190	90	-1	5	2102	78.9338	496.361	1.29628	212.238	243.341	40.7825	896.318
Ch	FeCl4	C[N+](C)(C)CCO.Cl[Fe-](Cl)(Cl)Cl	0.02	4	180	90	-1	5	2345	53.1923	442.485	1.35035	314.947	67.1411	60.3967	896.417
TMG	ZnCl3	[N+]=C(N(C)C)N(C)C.Cl[Zn-](Cl)Cl	0.08	4	180	120	-1	5	2717	77.9088	489.325	1.30352	215.031	212.45	61.8441	896.423
C8TMG	ZnCl3	CCCCCCCC[N+]=C(N(C)C)N(C)C.Cl[Zn-](Cl)Cl	0.02	4	160	120	-1	5	5644	63.2173	476.923	1.31603	265.003	135.971	75.9498	896.479
C2TMG	HCO3	CC[N+]=C(N(C)C)N(C)C.OC([O-])=O	0.02	4	160	90	-1	5	4282	54.7788	483.288	1.31007	305.826	119.05	58.4129	896.68
EMIM	ZnCl4	CCN1C=C[N+](=C1)C.Cl[Zn-2](Cl)(Cl)Cl	0.1	4	190	90	-1	5	1769	72.2928	462.6	1.33109	231.735	186.336	44.5289	896.844
C2TMG	But	CC[N+]=C(N(C)C)N(C)C.CCCC(=O)[O-]	0.04	4	170	90	-1	5	4231	61.7309	532.091	1.26174	271.384	208.768	51.9383	896.913
C2TMG	Ac	CC[N+]=C(N(C)C)N(C)C.CC(=O)[O-]	0.02	4	160	90	-1	5	4361	54.8253	485.073	1.30896	305.567	121.143	58.3633	897.017
C4TMG	Lys	CCCC[N+]=C(N(C)C)N(C)C.C(CCN)CC(C(=O)[O-])N	0.02	4	160	90	-1	5	4371	54.8216	485.384	1.30905	305.587	121.429	58.3673	897.217
TMG	But	[N+]=C(N(C)C)N(C)C.CCCC(=O)[O-]	0.04	4	190	90	-1	5	3408	60.3523	502.922	1.29162	277.583	172.001	53.3388	897.272
TMG	Lys	[N+]=C(N(C)C)N(C)C.C(CCN)CC(C(=O)[O-])N	0.02	4	190	120	-1	5	2912	60.9212	427.017	1.36771	274.991	72.7975	79.2287	897.361
Ch	Ala	C[N+](C)(C)CCO.CC(C(=O)[O-])N	0.04	4	190	90	-1	5	3412	60.3528	503.12	1.29161	277.581	172.201	53.3384	897.366
Ch	ZnCl4	C[N+](C)(C)CCO.Cl[Zn-2](Cl)(Cl)Cl	0.06	4	180	150	-1	5	2102	79.0772	417.923	1.37696	211.853	121.45	84.6196	897.441
TMG	Ser	[N+]=C(N(C)C)N(C)C.C(C(C(=O)[O-])N)O	0.04	4	170	90	-1	5	4237	61.7016	532.639	1.26233	271.513	209.164	51.9629	897.487
DEIM	ZnCl4	CC[N]1C=C[N+](=C1)CC.Cl[Zn-2](Cl)(Cl)Cl	0.02	6	190	90	-1	5	1966	72.8033	440.318	1.35469	345.165	41.1269	54.026	897.503
TMG	Ac	[N+]=C(N(C)C)N(C)C.CC(=O)[O-]	0.04	4	190	90	-1	5	3427	60.3662	503.765	1.29132	277.519	172.92	53.3266	897.545
C8TMG	Pro	CCCCCCCC[N+]=C(N(C)C)N(C)C.CCC(=O)[O-]	0.02	4	190	90	-1	5	11189	60.6477	610.287	1.18488	276.231	280.977	53.079	897.584
N2222	But	CC[N+](CC)(CC)CC.CCCC(=O)[O-]	0.02	4	180	120	-1	5	5497	63.0681	474.769	1.32048	265.63	132.743	76.3968	897.624
N1111	Gly	C[N+](C)(C)C.C(C(=O)[O-])N	0.02	4	190	120	-1	5	3001	60.9644	428.938	1.36674	274.796	74.9693	79.1726	897.837
DMIM	ZnCl4	CN1C=C[N+](=C1)C.Cl[Zn-2](Cl)(Cl)Cl	0.02	6	190	90	-1	5	1877	72.6979	439.092	1.35665	345.666	39.3221	54.1044	897.873
C6TMG	ZnCl4	CCCCCC[N+]=C(N(C)C)N(C)C.Cl[Zn-2](Cl)(Cl)Cl	0.04	4	160	90	-1	5	5675	64.0911	581.022	1.21477	261.39	269.707	49.9256	897.897
C4TMG	Gly	CCCC[N+]=C(N(C)C)N(C)C.C(C(=O)[O-])N	0.02	4	180	120	-1	5	5491	63.0436	474.809	1.32099	265.733	132.649	76.4264	897.9
DEIM	MnCl3	CC[N]1C=C[N+](=C1)CC.Cl[Mn-](Cl)Cl	0.08	4	190	90	-1	5	1924	67.8218	467.295	1.32902	247.012	172.818	47.4644	898.155
Ch	ZnCl3	C[N+](C)(C)CCO.Cl[Zn-](Cl)Cl	0.08	4	160	90	-1	5	1880	67.6039	464.55	1.33188	247.808	169.411	47.3314	898.213
DMIM	MnCl3	CN1C=C[N+](=C1)C.Cl[Mn-](Cl)Cl	0.08	4	190	90	-1	5	1851	67.568	462.468	1.33401	247.939	166.886	47.6427	898.237
N2222	ZnCl4	CC[N+](CC)(CC)CC.Cl[Zn-2](Cl)(Cl)Cl	0.04	4	180	150	-1	5	5149	78.9946	495.324	1.30128	212.075	198.541	84.7081	898.302
C2TMG	HCO3	CC[N+]=C(N(C)C)N(C)C.OC([O-])=O	0.04	4	170	90	-1	5	4282	61.7144	534.75	1.26207	271.457	211.341	51.9521	898.411
EMIM	ZnCl3	CCN1C=C[N+](=C1)C.Cl[Zn-](Cl)Cl	0.02	4	170	90	-1	5	1632	52.441	427.995	1.36908	319.459	47.3962	61.1391	898.539
AMIM	ZnCl3	C[N+]1=CN(C=C1)CC=C.Cl[Zn-](Cl)Cl	0.02	4	190	180	-1	5	1852	78.1958	363.427	1.43432	214.241	36.0705	113.115	898.874
N2222	Lys	CC[N+](CC)(CC)CC.C(CCN)CC(C(=O)[O-])N	0.02	4	160	90	-1	5	4590	54.9042	490.728	1.30708	305.127	127.321	58.2795	898.905
BMIM	CoCl4	CCCCN1C=C[N+](=C1)C.Cl[Co-2](Cl)(Cl)Cl	0.02	4	190	90	-1	5	4011	54.4684	478.82	1.3193	307.569	112.151	59.1007	899.062
Ch	ZnCl3	C[N+](C)(C)CCO.Cl[Zn-](Cl)Cl	0.12	4	180	90	-1	5	1880	77.5305	479.097	1.31932	216.08	221.58	41.4371	899.21
DEIM	MnCl3	CC[N]1C=C[N+](=C1)CC.Cl[Mn-](Cl)Cl	0.02	4	190	150	-1	5	1924	68.4619	385.396	1.41326	244.702	42.8006	97.8933	899.328
Ch	OH	C[N+](C)(C)CCO.[OH-]	0.04	4	180	120	-1	5	2579	66.041	445.579	1.35328	253.672	118.949	72.9576	899.429
C4TMG	Ser	CCCC[N+]=C(N(C)C)N(C)C.C(C(C(=O)[O-])N)O	0.02	4	180	120	-1	5	5639	63.0536	478.308	1.32078	265.691	136.203	76.4143	899.544
N1111	ZnCl4	C[N+](C)(C)C.Cl[Zn-2](Cl)(Cl)Cl	0.06	4	160	90	-1	5	2368	63.763	482.597	1.31656	262.735	169.679	50.1825	899.58
C4TMG	OH	CCCC[N+]=C(N(C)C)N(C)C.[OH-]	0.04	4	180	90	-1	5	6368	65.1715	603.977	1.19562	257.057	297.625	49.2952	899.797
N2222	ZnCl4	CC[N+](CC)(CC)CC.Cl[Zn-2](Cl)(Cl)Cl	0.08	4	190	90	-1	5	5149	78.6136	653.058	1.14657	213.103	399.006	40.9487	899.815
C4TMG	For	CCCC[N+]=C(N(C)C)N(C)C.C(=O)[O-]	0.02	4	180	120	-1	5	5655	63.0409	478.791	1.32105	265.745	136.617	76.4297	899.92
DMIM	CoCl4	CN1C=C[N+](=C1)C.Cl[Co-2](Cl)(Cl)Cl	0.02	4	180	120	-1	5	4734	62.2569	462.29	1.33768	269.091	115.807	77.3921	899.986
C2TMG	Ac	CC[N+]=C(N(C)C)N(C)C.CC(=O)[O-]	0.04	4	170	90	-1	5	4361	61.7362	538.459	1.26163	271.361	215.164	51.9338	900.043
C2TMG	But	CC[N+]=C(N(C)C)N(C)C.CCCC(=O)[O-]	0.02	4	170	120	-1	5	4231	61.7907	453.244	1.3471	271.121	104.283	77.8393	900.169
N2222	HCO3	CC[N+](CC)(CC)CC.OC([O-])=O	0.02	4	180	120	-1	5	5725	63.0734	480.235	1.32037	265.608	138.237	76.3903	900.3
N1111	ZnCl4	C[N+](C)(C)C.Cl[Zn-2](Cl)(Cl)Cl	0.04	4	160	120	-1	5	2368	65.5637	438.763	1.36185	255.519	110.012	73.2317	900.307
N1111	ZnCl3	C[N+](C)(C)C.Cl[Zn-](Cl)Cl	0.12	4	190	90	-1	5	2044	78.2825	493.721	1.30706	214.004	238.595	41.1219	900.391
Ch	Ser	C[N+](C)(C)CCO.C(C(C(=O)[O-])N)O	0.02	4	190	120	-1	5	3200	60.9584	433.952	1.36687	274.823	79.9485	79.1803	900.411
C4TMG	Lys	CCCC[N+]=C(N(C)C)N(C)C.C(CCN)CC(C(=O)[O-])N	0.04	4	170	90	-1	5	4371	61.7201	539.093	1.26196	271.432	215.714	51.9474	900.525
C8TMG	OH	CCCCCCCC[N+]=C(N(C)C)N(C)C.[OH-]	0.02	4	180	120	-1	5	8374	65.2913	525.712	1.27551	256.585	195.331	73.7954	900.613
BMIM	Fe2Cl6O	CCCCN1C=C[N+](=C1)C.Cl[Fe-](Cl)(Cl)O[Fe-](Cl)(Cl)Cl	0.02	4	190	90	-1	5	2000	52.671	437.012	1.36432	318.064	57.8299	61.1175	900.668
C2TMG	CoCl4	CC[N+]=C(N(C)C)N(C)C.Cl[Co-2](Cl)(Cl)Cl	0.02	4	190	90	-1	5	6330	56.3315	525.68	1.27567	297.396	171.138	57.146	900.675
TMG	Ser	[N+]=C(N(C)C)N(C)C.C(C(C(=O)[O-])N)O	0.02	4	170	120	-1	5	4237	61.7588	453.626	1.34779	271.261	104.485	77.8795	900.708
TMG	Ala	[N+]=C(N(C)C)N(C)C.CC(C(=O)[O-])N	0.02	4	160	90	-1	5	4521	54.7341	490.333	1.31114	306.076	125.797	58.4606	900.738
TMG	ZnCl3	[N+]=C(N(C)C)N(C)C.Cl[Zn-](Cl)Cl	0.06	4	190	150	-1	5	2717	80.3811	446.231	1.35527	208.417	154.437	83.3773	900.751
C2TMG	Gly	CC[N+]=C(N(C)C)N(C)C.C(C(=O)[O-])N	0.02	4	160	90	-1	5	4637	54.8312	492.687	1.30882	305.534	128.796	58.3571	900.754
DMIM	CoCl4	CN1C=C[N+](=C1)C.Cl[Co-2](Cl)(Cl)Cl	0.04	4	180	90	-1	5	4734	62.3386	551.584	1.24995	268.739	231.311	51.5353	900.767
DEIM	ZnCl4	CC[N]1C=C[N+](=C1)CC.Cl[Zn-2](Cl)(Cl)Cl	0.02	4	170	90	-1	5	1966	52.5932	436.428	1.36512	318.535	56.9308	60.9621	900.774
AMIM	FeCl4	C[N+]1=CN(C=C1)CC=C.Cl[Fe-](Cl)(Cl)Cl	0.02	4	180	90	-1	5	2292	52.8823	443.552	1.35826	316.793	66.0082	60.7507	900.908
C4TMG	CoCl3	CCCC[N+]=C(N(C)C)N(C)C.Cl[Co-](Cl)Cl	0.02	4	180	120	-1	5	6951	64.0662	501.937	1.29991	261.492	165.239	75.2065	900.921
C4TMG	ZnCl4	CCCC[N+]=C(N(C)C)N(C)C.Cl[Zn-2](Cl)(Cl)Cl	0.08	4	190	90	-1	5	4814	77.3667	637.204	1.16505	216.537	379.058	41.6086	901.127
N1111	Asp	C[N+](C)(C)C.C(C(C(=O)[O-])N)C(=O)O	0.02	4	180	120	-1	5	5793	63.0723	481.885	1.32039	265.612	139.881	76.3916	901.137
C2TMG	HCO3	CC[N+]=C(N(C)C)N(C)C.OC([O-])=O	0.02	4	170	120	-1	5	4282	61.7657	454.685	1.34764	271.231	105.583	77.8708	901.162
DEIM	ZnCl3	CC[N]1C=C[N+](=C1)CC.Cl[Zn-](Cl)Cl	0.02	4	190	180	-1	5	1790	77.9423	363.397	1.43898	214.938	34.9763	113.483	901.191
C2TMG	Ser	CC[N+]=C(N(C)C)N(C)C.C(C(C(=O)[O-])N)O	0.04	4	180	90	-1	5	4906	62.5946	557.698	1.24484	267.639	238.734	51.3245	901.267
N2222	Ac	CC[N+](CC)(CC)CC.CC(=O)[O-]	0.02	4	180	120	-1	5	5825	63.0772	482.62	1.32029	265.592	140.643	76.3857	901.453
TMG	HCO3	[N+]=C(N(C)C)N(C)C.OC([O-])=O	0.02	4	190	120	-1	5	3346	61.0011	437.294	1.36592	274.631	83.5377	79.125	901.605
C2TMG	Ac	CC[N+]=C(N(C)C)N(C)C.CC(=O)[O-]	0.02	4	170	120	-1	5	4361	61.7933	456.429	1.34704	271.11	107.483	77.836	901.734
TMG	ZnCl4	[N+]=C(N(C)C)N(C)C.Cl[Zn-2](Cl)(Cl)Cl	0.04	4	170	150	-1	5	3192	75.354	440.011	1.36346	222.321	129.027	88.6627	901.738
C2TMG	For	CC[N+]=C(N(C)C)N(C)C.C(=O)[O-]	0.02	4	160	90	-1	5	4693	54.81	494.433	1.30933	305.652	130.402	58.3796	901.88
DEIM	CrCl4	CC[N]1C=C[N+](=C1)CC.Cl[Cr-](Cl)(Cl)Cl	0.02	4	190	120	-1	5	7096	64.1472	504.879	1.29892	261.161	168.473	75.2443	901.901
C4TMG	ZnCl3	CCCC[N+]=C(N(C)C)N(C)C.Cl[Zn-](Cl)Cl	0.06	4	180	120	-1	5	4096	75.2464	535.379	1.26868	222.639	248.708	64.0323	902.031
N2222	ZnCl4	CC[N+](CC)(CC)CC.Cl[Zn-2](Cl)(Cl)Cl	0.06	4	180	120	-1	5	5149	77.9094	578.832	1.22532	215.029	301.959	61.8436	902.075
Ch	ZnCl4	C[N+](C)(C)CCO.Cl[Zn-2](Cl)(Cl)Cl	0.02	6	180	90	-1	5	2102	72.5117	444.816	1.35949	346.553	44.1488	54.1141	902.156
C4TMG	Lys	CCCC[N+]=C(N(C)C)N(C)C.C(CCN)CC(C(=O)[O-])N	0.02	4	170	120	-1	5	4371	61.7703	456.845	1.34754	271.211	107.769	77.8649	902.192
C4TMG	FeCl4	CCCC[N+]=C(N(C)C)N(C)C.Cl[Fe-](Cl)(Cl)Cl	0.02	4	180	120	-1	5	4321	61.7403	455.971	1.34888	271.343	106.588	78.0397	902.423
AMIM	Fe2Cl6O	C[N+]1=CN(C=C1)CC=C.Cl[Fe-](Cl)(Cl)O[Fe-](Cl)(Cl)Cl	0.02	4	190	90	-1	5	2319	52.8267	444.921	1.3603	317.127	66.8561	60.9374	902.613
N1111	OH	C[N+](C)(C)C.[OH-]	0.04	4	170	90	-1	5	3254	59.6888	500.437	1.3049	280.668	166.054	53.7151	902.669
Ch	MnCl3	C[N+](C)(C)CCO.Cl[Mn-](Cl)Cl	0.06	4	190	90	-1	5	2028	62.746	465.969	1.33943	266.993	147.672	51.304	902.702
DMIM	ZnCl3	CN1C=C[N+](=C1)C.Cl[Zn-](Cl)Cl	0.06	4	180	120	-1	5	1706	69.1405	424.723	1.38072	242.3	112.736	69.687	902.722
DEIM	ZnCl3	CC[N]1C=C[N+](=C1)CC.Cl[Zn-](Cl)Cl	0.08	4	190	120	-1	5	1790	74.2613	437.429	1.36812	225.592	146.84	64.9963	902.773
TMG	Ac	[N+]=C(N(C)C)N(C)C.CC(=O)[O-]	0.02	4	190	120	-1	5	3427	60.9877	439.412	1.36622	274.691	85.5787	79.1423	902.814
N1111	ZnCl3	C[N+](C)(C)C.Cl[Zn-](Cl)Cl	0.06	4	180	150	-1	5	2044	78.4579	417.844	1.38783	213.526	119.031	85.2876	902.837
TMG	But	[N+]=C(N(C)C)N(C)C.CCCC(=O)[O-]	0.02	4	190	120	-1	5	3408	60.9655	439.097	1.36671	274.791	85.1352	79.1711	902.905
EMIM	ZnCl3	CCN1C=C[N+](=C1)C.Cl[Zn-](Cl)Cl	0.06	4	190	150	-1	5	1632	77.4402	399.163	1.40674	216.332	96.2873	86.5437	902.951
DEIM	ZnCl3	CC[N]1C=C[N+](=C1)CC.Cl[Zn-](Cl)Cl	0.02	4	180	150	-1	5	1790	68.0295	384.692	1.42148	246.257	40.0728	98.3614	903.083
AMIM	ZnCl4	C[N+]1=CN(C=C1)CC=C.Cl[Zn-2](Cl)(Cl)Cl	0.08	4	190	120	-1	5	2047	75.1021	453.378	1.3528	223.067	166.043	64.2686	903.088
Ch	Ala	C[N+](C)(C)CCO.CC(C(=O)[O-])N	0.02	4	190	120	-1	5	3412	60.9543	439.278	1.36696	274.842	85.2509	79.1858	903.122
C2TMG	Lys	CC[N+]=C(N(C)C)N(C)C.C(CCN)CC(C(=O)[O-])N	0.04	4	190	90	-1	5	3619	60.314	513.897	1.29244	277.759	182.766	53.3727	903.169
DEIM	ZnCl3	CC[N]1C=C[N+](=C1)CC.Cl[Zn-](Cl)Cl	0.02	6	190	90	-1	5	1790	72.183	440.388	1.36633	348.131	37.767	54.4903	903.359
DEIM	ZnCl4	CC[N]1C=C[N+](=C1)CC.Cl[Zn-2](Cl)(Cl)Cl	0.06	4	190	150	-1	5	1966	78.2466	414.552	1.39224	214.102	114.798	85.6518	903.397
C4TMG	Ala	CCCC[N+]=C(N(C)C)N(C)C.CC(C(=O)[O-])N	0.02	4	180	120	-1	5	5947	63.0424	485.834	1.32102	265.738	143.668	76.4279	903.425
N1111	Ser	C[N+](C)(C)C.C(C(C(=O)[O-])N)O	0.04	4	190	90	-1	5	3650	60.3475	515.177	1.29172	277.605	184.229	53.3431	903.451
C2TMG	ZnCl3	CC[N+]=C(N(C)C)N(C)C.Cl[Zn-](Cl)Cl	0.06	4	170	120	-1	5	3383	73.2932	505.084	1.30192	228.572	210.889	65.6233	903.501
C8TMG	ZnCl3	CCCCCCCC[N+]=C(N(C)C)N(C)C.Cl[Zn-](Cl)Cl	0.06	4	180	90	-1	5	5644	71.8097	637.135	1.16992	233.294	359.103	44.7382	903.53
EMIM	CoCl4	CCN1C=C[N+](=C1)C.Cl[Co-2](Cl)(Cl)Cl	0.02	4	180	120	-1	5	4435	61.7581	458.65	1.34849	271.264	109.369	78.0172	903.569
N2222	Gly	CC[N+](CC)(CC)CC.C(C(=O)[O-])N	0.02	4	180	120	-1	5	6010	63.0749	487.105	1.32033	265.601	145.115	76.3885	903.719
C6TMG	ZnCl3	CCCCCC[N+]=C(N(C)C)N(C)C.Cl[Zn-](Cl)Cl	0.06	4	170	90	-1	5	4853	69.7671	603.896	1.20372	240.124	317.816	45.9557	903.807
C2TMG	Ser	CC[N+]=C(N(C)C)N(C)C.C(C(C(=O)[O-])N)O	0.02	4	160	90	-1	5	4906	54.8721	499.785	1.30784	305.306	136.166	58.3135	903.815
AMIM	MnCl3	C[N+]1=CN(C=C1)CC=C.Cl[Mn-](Cl)Cl	0.02	4	180	90	-1	5	1989	52.4559	438.361	1.3693	319.369	57.7477	61.2445	903.833
C6TMG	But	CCCCCC[N+]=C(N(C)C)N(C)C.CCCC(=O)[O-]	0.02	4	180	120	-1	5	5969	63.0223	486.52	1.32144	265.823	144.245	76.4522	903.979
TMG	ZnCl3	[N+]=C(N(C)C)N(C)C.Cl[Zn-](Cl)Cl	0.02	4	160	150	-1	5	2717	68.6691	401.367	1.40674	243.964	60.2591	97.1438	904.051
TMG	OH	[N+]=C(N(C)C)N(C)C.[OH-]	0.02	4	170	120	-1	5	4352	61.6271	457.437	1.35067	271.841	107.55	78.0459	904.054
TMG	Asp	[N+]=C(N(C)C)N(C)C.C(C(C(=O)[O-])N)C(=O)O	0.02	4	180	120	-1	5	5966	63.0145	486.508	1.3216	265.856	144.191	76.4617	904.055
C2TMG	ZnCl4	CC[N+]=C(N(C)C)N(C)C.Cl[Zn-2](Cl)(Cl)Cl	0.02	4	180	180	-1	5	3985	79.497	398.186	1.41007	210.735	76.3434	111.108	904.127
N1111	ZnCl4	C[N+](C)(C)C.Cl[Zn-2](Cl)(Cl)Cl	0.02	6	190	90	-1	5	2368	72.607	449.941	1.35835	346.098	49.6703	54.1721	904.146
DEIM	Fe2Cl6O	CC[N]1C=C[N+](=C1)CC.Cl[Fe-](Cl)(Cl)O[Fe-](Cl)(Cl)Cl	0.02	4	190	90	-1	5	2254	52.6729	444.34	1.36428	318.053	65.172	61.1153	904.308
N2222	Lys	CC[N+](CC)(CC)CC.C(CCN)CC(C(=O)[O-])N	0.02	4	170	120	-1	5	4590	61.8092	461.954	1.34669	271.04	113.098	77.8159	904.322
C6TMG	FeCl4	CCCCCC[N+]=C(N(C)C)N(C)C.Cl[Fe-](Cl)(Cl)Cl	0.02	4	170	90	-1	5	5013	54.9418	502.234	1.30677	304.919	138.96	58.3562	904.5
C8TMG	Lys	CCCCCCCC[N+]=C(N(C)C)N(C)C.C(CCN)CC(C(=O)[O-])N	0.02	4	180	120	-1	5	5988	63.0003	487.149	1.3219	265.916	144.755	76.4789	904.523
N2222	Pro	CC[N+](CC)(CC)CC.CCC(=O)[O-]	0.02	4	190	90	-1	5	11780	60.6754	624.842	1.18434	276.105	295.683	53.0548	904.592
Ch	HCO3	C[N+](C)(C)CCO.OC([O-])=O	0.06	4	180	90	-1	5	1984	62.4818	464.618	1.34458	268.123	145.079	51.4172	904.601
TMG	Ala	[N+]=C(N(C)C)N(C)C.CC(C(=O)[O-])N	0.02	4	170	120	-1	5	4521	61.729	460.852	1.34844	271.392	111.542	77.9171	904.647
TMG	Ala	[N+]=C(N(C)C)N(C)C.CC(C(=O)[O-])N	0.04	4	170	90	-1	5	4521	61.6801	546.849	1.26277	271.607	223.261	51.981	904.811
TMG	OH	[N+]=C(N(C)C)N(C)C.[OH-]	0.04	4	170	90	-1	5	4352	61.3871	541.074	1.2688	272.904	215.941	52.2291	904.937
DMIM	CoCl3	CN1C=C[N+](=C1)C.Cl[Co-](Cl)Cl	0.02	4	180	90	-1	5	5308	55.1835	508.293	1.30162	303.583	146.493	58.2174	904.959
N2222	Ser	CC[N+](CC)(CC)CC.C(C(C(=O)[O-])N)O	0.02	4	180	120	-1	5	6118	63.0792	489.679	1.32025	265.583	147.713	76.3833	904.962
Ch	ZnCl4	C[N+](C)(C)CCO.Cl[Zn-2](Cl)(Cl)Cl	0.1	4	170	90	-1	5	2102	72.9952	492.71	1.3174	229.505	219.282	43.9233	905.054
AMIM	MnCl3	C[N+]1=CN(C=C1)CC=C.Cl[Mn-](Cl)Cl	0.02	4	190	150	-1	5	1989	68.0777	389.025	1.42123	246.083	44.4963	98.4457	905.129
C2TMG	Gly	CC[N+]=C(N(C)C)N(C)C.C(C(=O)[O-])N	0.02	4	170	120	-1	5	4637	61.7926	463.236	1.34705	271.113	114.286	77.8368	905.144
C8TMG	ZnCl4	CCCCCCCC[N+]=C(N(C)C)N(C)C.Cl[Zn-2](Cl)(Cl)Cl	0.02	4	170	150	-1	5	6559	71.8518	465.167	1.34514	233.157	139.025	92.9843	905.152
N2222	Lys	CC[N+](CC)(CC)CC.C(CCN)CC(C(=O)[O-])N	0.04	4	170	90	-1	5	4590	61.7598	549.547	1.26114	271.257	226.376	51.914	905.346
AMIM	OH	C[N+]1=CN(C=C1)CC=C.[OH-]	0.02	4	190	90	-1	5	2425	52.7562	448.575	1.36212	317.551	70.0056	61.0188	905.349
TMG	For	[N+]=C(N(C)C)N(C)C.C(=O)[O-]	0.04	4	190	90	-1	5	3737	60.3635	519.43	1.29138	277.531	188.57	53.3289	905.406
Ch	Asp	C[N+](C)(C)CCO.C(C(C(=O)[O-])N)C(=O)O	0.02	4	160	90	-1	5	5125	54.9576	505.077	1.30581	304.831	142.023	58.2228	905.443
C4TMG	OH	CCCC[N+]=C(N(C)C)N(C)C.[OH-]	0.04	4	190	90	-1	5	6368	64.7813	607.715	1.20332	258.605	299.418	49.6921	905.515
DEIM	CoCl4	CC[N]1C=C[N+](=C1)CC.Cl[Co-2](Cl)(Cl)Cl	0.04	4	180	90	-1	5	4469	61.5582	545.465	1.2658	272.145	221.131	52.1886	905.63
C4TMG	But	CCCC[N+]=C(N(C)C)N(C)C.CCCC(=O)[O-]	0.04	4	180	90	-1	5	5086	62.5897	566.502	1.24493	267.66	247.513	51.3285	905.718
Ch	Leu	C[N+](C)(C)CCO.CC(C)CC(C(=O)[O-])N	0.02	4	180	120	-1	5	6166	63.0579	491.004	1.32069	265.673	148.922	76.409	905.847
Ch	Lys	C[N+](C)(C)CCO.C(CCN)CC(C(=O)[O-])N	0.06	4	180	90	-1	5	1993	62.4171	465.759	1.34598	268.4	145.888	51.4705	905.868
Ch	Asp	C[N+](C)(C)CCO.C(C(C(=O)[O-])N)C(=O)O	0.04	4	180	90	-1	5	5125	62.6336	568.001	1.24406	267.473	249.236	51.2926	906.032
C2TMG	For	CC[N+]=C(N(C)C)N(C)C.C(=O)[O-]	0.02	4	170	120	-1	5	4693	61.7785	464.723	1.34736	271.175	115.693	77.8547	906.042
EMIM	ZnCl4	CCN1C=C[N+](=C1)C.Cl[Zn-2](Cl)(Cl)Cl	0.06	4	180	120	-1	5	1769	69.0421	429.497	1.38269	242.646	117.066	69.7863	906.093
C4TMG	MnCl3	CCCC[N+]=C(N(C)C)N(C)C.Cl[Mn-](Cl)Cl	0.04	4	190	120	-1	5	4284	68.447	505.915	1.30633	244.755	190.642	70.5174	906.121
N1111	Ser	C[N+](C)(C)C.C(C(C(=O)[O-])N)O	0.02	4	190	120	-1	5	3650	60.9525	445.238	1.36701	274.85	91.2002	79.1881	906.122
C2TMG	Lys	CC[N+]=C(N(C)C)N(C)C.C(CCN)CC(C(=O)[O-])N	0.02	4	190	120	-1	5	3619	60.9255	444.66	1.36761	274.971	90.4656	79.2231	906.135
C2TMG	MnCl3	CC[N+]=C(N(C)C)N(C)C.Cl[Mn-](Cl)Cl	0.04	4	190	120	-1	5	3564	67.2289	482.461	1.33	249.19	161.475	71.7952	906.229
DEIM	ZnCl3	CC[N]1C=C[N+](=C1)CC.Cl[Zn-](Cl)Cl	0.1	4	190	90	-1	5	1790	71.6316	469.102	1.34337	233.874	190.288	44.94	906.238
TMG	ZnCl3	[N+]=C(N(C)C)N(C)C.Cl[Zn-](Cl)Cl	0.02	6	180	90	-1	5	2717	72.7004	456.545	1.35596	345.654	56.9176	53.9736	906.255
C2TMG	ZnCl3	CC[N+]=C(N(C)C)N(C)C.Cl[Zn-](Cl)Cl	0.08	4	170	90	-1	5	3383	72.0669	562.92	1.24984	232.461	285.97	44.4891	906.378
C4TMG	ZnCl4	CCCC[N+]=C(N(C)C)N(C)C.Cl[Zn-2](Cl)(Cl)Cl	0.02	4	190	180	-1	5	4814	80.0364	411.431	1.40133	209.314	91.6036	110.514	906.383
C6TMG	HCO3	CCCCCC[N+]=C(N(C)C)N(C)C.OC([O-])=O	0.02	4	180	120	-1	5	6184	63.0266	491.682	1.32135	265.805	149.431	76.447	906.514
C4TMG	ZnCl4	CCCC[N+]=C(N(C)C)N(C)C.Cl[Zn-2](Cl)(Cl)Cl	0.06	4	180	120	-1	5	4814	76.6809	568.144	1.24495	218.474	286.836	62.8343	906.546
C4TMG	ZnCl4	CCCC[N+]=C(N(C)C)N(C)C.Cl[Zn-2](Cl)(Cl)Cl	0.02	6	190	90	-1	5	4814	74.4582	488.785	1.32458	337.493	98.4663	52.8253	906.683
DMIM	ZnCl4	CN1C=C[N+](=C1)C.Cl[Zn-2](Cl)(Cl)Cl	0.1	4	190	90	-1	5	1877	71.9575	476.185	1.33729	232.815	198.633	44.7364	906.738
TMG	For	[N+]=C(N(C)C)N(C)C.C(=O)[O-]	0.02	4	190	120	-1	5	3737	60.9812	447.201	1.36636	274.72	93.33	79.1508	906.781
C2TMG	Gly	CC[N+]=C(N(C)C)N(C)C.C(C(=O)[O-])N	0.04	4	170	90	-1	5	4637	61.7382	552.058	1.26159	271.352	228.774	51.9321	906.822
TMG	ZnCl4	[N+]=C(N(C)C)N(C)C.Cl[Zn-2](Cl)(Cl)Cl	0.02	4	160	150	-1	5	3192	68.8567	410.78	1.4029	243.299	70.601	96.8792	906.842
C4TMG	But	CCCC[N+]=C(N(C)C)N(C)C.CCCC(=O)[O-]	0.02	4	160	90	-1	5	5086	54.839	505.087	1.30864	305.49	141.248	58.3488	906.861
C4TMG	ZnCl4	CCCC[N+]=C(N(C)C)N(C)C.Cl[Zn-2](Cl)(Cl)Cl	0.04	4	180	150	-1	5	4814	77.6758	490.597	1.32337	215.676	188.775	86.1463	906.986
AMIM	ZnCl4	C[N+]1=CN(C=C1)CC=C.Cl[Zn-2](Cl)(Cl)Cl	0.06	4	190	150	-1	5	2047	78.1377	419.866	1.39418	214.401	119.694	85.7711	907.024
AMIM	ZnCl4	C[N+]1=CN(C=C1)CC=C.Cl[Zn-2](Cl)(Cl)Cl	0.02	6	190	90	-1	5	2047	72.1008	446.319	1.36789	348.528	43.2386	54.5525	907.104
EMIM	CoCl4	CCN1C=C[N+](=C1)C.Cl[Co-2](Cl)(Cl)Cl	0.06	4	190	120	-1	5	4435	75.7064	552.697	1.26153	221.286	267.655	63.7556	907.115
Ch	Ac	C[N+](C)(C)CCO.CC(=O)[O-]	0.06	4	180	90	-1	5	2054	62.478	469.766	1.34467	268.139	150.207	51.4203	907.216
N2222	For	CC[N+](CC)(CC)CC.C(=O)[O-]	0.02	4	180	120	-1	5	6298	63.0718	494.083	1.3204	265.614	152.076	76.3922	907.241
AMIM	ZnCl3	C[N+]1=CN(C=C1)CC=C.Cl[Zn-](Cl)Cl	0.08	4	190	120	-1	5	1852	74.0887	443.546	1.3713	226.118	152.28	65.1478	907.425
C6TMG	Ac	CCCCCC[N+]=C(N(C)C)N(C)C.CC(=O)[O-]	0.02	4	180	120	-1	5	6260	63.026	493.524	1.32136	265.807	151.269	76.4478	907.442
AMIM	ZnCl3	C[N+]1=CN(C=C1)CC=C.Cl[Zn-](Cl)Cl	0.02	4	180	150	-1	5	1852	67.7495	387.676	1.42735	247.275	41.6322	98.768	907.513
TMG	Gly	[N+]=C(N(C)C)N(C)C.C(C(=O)[O-])N	0.04	4	190	90	-1	5	3820	60.3618	523.633	1.29142	277.539	192.764	53.3304	907.525
Ch	ZnCl4	C[N+](C)(C)CCO.Cl[Zn-2](Cl)(Cl)Cl	0.1	4	190	120	-1	5	2102	80.0343	469.624	1.34555	209.32	199.996	60.308	907.586
DEIM	ZnCl4	CC[N]1C=C[N+](=C1)CC.Cl[Zn-2](Cl)(Cl)Cl	0.1	4	190	90	-1	5	1966	72.2393	483.709	1.33207	231.907	207.24	44.5619	907.891
TMG	Gly	[N+]=C(N(C)C)N(C)C.C(C(=O)[O-])N	0.02	4	190	120	-1	5	3820	60.9757	449.315	1.36648	274.745	95.4115	79.158	907.9
C6TMG	Lys	CCCCCC[N+]=C(N(C)C)N(C)C.C(CCN)CC(C(=O)[O-])N	0.04	4	180	90	-1	5	5164	62.5561	570.604	1.2456	267.804	251.444	51.3561	908.103
C2TMG	Ser	CC[N+]=C(N(C)C)N(C)C.C(C(C(=O)[O-])N)O	0.02	4	170	120	-1	5	4906	61.812	469.719	1.34663	271.028	120.879	77.8125	908.175
DMIM	MnCl3	CN1C=C[N+](=C1)C.Cl[Mn-](Cl)Cl	0.06	4	190	120	-1	5	1851	69.1105	434.617	1.38194	242.406	122.371	69.8405	908.276
DMIM	ZnCl4	CN1C=C[N+](=C1)C.Cl[Zn-2](Cl)(Cl)Cl	0.04	4	190	180	-1	5	1877	82.3239	380.389	1.4364	203.498	69.4484	107.443	908.392
C2TMG	For	CC[N+]=C(N(C)C)N(C)C.C(=O)[O-]	0.04	4	170	90	-1	5	4693	61.7247	554.942	1.26186	271.411	231.588	51.9434	908.401
C2TMG	Ala	CC[N+]=C(N(C)C)N(C)C.CC(C(=O)[O-])N	0.02	4	160	90	-1	5	5200	54.8403	508.24	1.3086	305.483	144.41	58.3473	908.422
C6TMG	Lys	CCCCCC[N+]=C(N(C)C)N(C)C.C(CCN)CC(C(=O)[O-])N	0.02	4	160	90	-1	5	5164	54.8085	507.535	1.30936	305.66	143.493	58.3812	908.449
C2TMG	Ala	CC[N+]=C(N(C)C)N(C)C.CC(C(=O)[O-])N	0.04	4	180	90	-1	5	5200	62.5843	572.099	1.24504	267.683	253.083	51.333	908.571
C2TMG	Asp	CC[N+]=C(N(C)C)N(C)C.C(C(C(=O)[O-])N)C(=O)O	0.02	4	180	120	-1	5	6384	63.0422	496.393	1.32102	265.739	154.225	76.4281	908.706
TMG	CoCl3	[N+]=C(N(C)C)N(C)C.Cl[Co-](Cl)Cl	0.04	4	190	90	-1	5	6124	64.1421	602.184	1.21531	261.182	290.814	50.1873	908.745
C6TMG	Gly	CCCCCC[N+]=C(N(C)C)N(C)C.C(C(=O)[O-])N	0.02	4	180	120	-1	5	6375	63.0308	496.265	1.32126	265.787	154.036	76.4419	908.761
EMIM	CoCl4	CCN1C=C[N+](=C1)C.Cl[Co-2](Cl)(Cl)Cl	0.08	4	190	90	-1	5	4435	75.4456	622.827	1.19472	222.051	358.108	42.6681	908.772
N1111	ZnCl4	C[N+](C)(C)C.Cl[Zn-2](Cl)(Cl)Cl	0.1	4	180	90	-1	5	2368	73.8196	514.734	1.30312	226.942	244.272	43.5201	908.927
N1111	ZnCl4	C[N+](C)(C)C.Cl[Zn-2](Cl)(Cl)Cl	0.06	4	190	150	-1	5	2368	78.778	435.07	1.38285	212.658	137.338	85.074	908.96
C2TMG	ZnCl3	CC[N+]=C(N(C)C)N(C)C.Cl[Zn-](Cl)Cl	0.04	4	160	120	-1	5	3383	66.636	478.099	1.33994	251.407	154.638	72.0534	909.019
C4TMG	HCO3	CCCC[N+]=C(N(C)C)N(C)C.OC([O-])=O	0.04	4	180	90	-1	5	5227	62.5907	573.354	1.24491	267.656	254.371	51.3277	909.134
Ch	ZnCl3	C[N+](C)(C)CCO.Cl[Zn-](Cl)Cl	0.06	4	160	120	-1	5	1880	69.0312	436.668	1.38169	242.684	124.431	69.5533	909.181
C6TMG	Ser	CCCCCC[N+]=C(N(C)C)N(C)C.C(C(C(=O)[O-])N)O	0.02	4	180	120	-1	5	6422	63.037	497.352	1.32113	265.761	155.156	76.4344	909.24
C2TMG	OH	CC[N+]=C(N(C)C)N(C)C.[OH-]	0.02	4	170	120	-1	5	5363	62.1164	478.622	1.34003	269.7	131.491	77.4311	909.327
EMIM	CrCl4	CCN1C=C[N+](=C1)C.Cl[Cr-](Cl)(Cl)Cl	0.02	4	190	120	-1	5	7193	63.7041	510.709	1.30796	262.978	171.964	75.7676	909.334
C8TMG	FeCl4	CCCCCCCC[N+]=C(N(C)C)N(C)C.Cl[Fe-](Cl)(Cl)Cl	0.04	4	180	90	-1	5	5745	63.4426	590.525	1.2282	264.062	275.825	50.6385	909.361
EMIM	CoCl3	CCN1C=C[N+](=C1)C.Cl[Co-](Cl)Cl	0.02	4	180	90	-1	5	5050	54.6897	505.698	1.31338	306.324	140.631	58.7431	909.538
C4TMG	HCO3	CCCC[N+]=C(N(C)C)N(C)C.OC([O-])=O	0.02	4	160	90	-1	5	5227	54.7929	509.43	1.30973	305.747	145.285	58.3978	909.583
EMIM	MnCl3	CCN1C=C[N+](=C1)C.Cl[Mn-](Cl)Cl	0.06	4	190	120	-1	5	1767	68.7942	431.036	1.38829	243.52	117.355	70.1616	909.662
AMIM	ZnCl3	C[N+]1=CN(C=C1)CC=C.Cl[Zn-](Cl)Cl	0.02	6	190	90	-1	5	1852	71.7158	444.574	1.37523	350.399	39.3297	54.8453	909.903
N1111	Ala	C[N+](C)(C)C.CC(C(=O)[O-])N	0.02	4	190	120	-1	5	3946	60.9464	452.679	1.36714	274.877	98.6059	79.196	909.91
N1111	ZnCl3	C[N+](C)(C)C.Cl[Zn-](Cl)Cl	0.1	4	170	90	-1	5	2044	72.3629	490.912	1.32891	231.511	215.094	44.3072	909.911
C4TMG	ZnCl3	CCCC[N+]=C(N(C)C)N(C)C.Cl[Zn-](Cl)Cl	0.08	4	180	90	-1	5	4096	74.1942	605.41	1.21443	225.796	336.313	43.3004	909.922
N2222	Ala	CC[N+](CC)(CC)CC.CC(C(=O)[O-])N	0.02	4	180	120	-1	5	6519	63.0688	499.443	1.32046	265.627	157.42	76.3958	909.952
DMIM	ZnCl4	CN1C=C[N+](=C1)C.Cl[Zn-2](Cl)(Cl)Cl	0.06	4	180	120	-1	5	1877	69.0141	436.822	1.38325	242.744	124.263	69.8146	910.036
C2TMG	ZnCl3	CC[N+]=C(N(C)C)N(C)C.Cl[Zn-](Cl)Cl	0.06	4	160	90	-1	5	3383	65.5764	539.969	1.28016	255.469	235.705	48.7948	910.063
Ch	Asp	C[N+](C)(C)CCO.C(C(C(=O)[O-])N)C(=O)O	0.02	4	170	120	-1	5	5125	61.8617	474.733	1.34555	270.81	126.173	77.75	910.141
C2TMG	MnCl3	CC[N+]=C(N(C)C)N(C)C.Cl[Mn-](Cl)Cl	0.06	4	190	90	-1	5	3564	66.0868	548.606	1.27172	253.497	246.399	48.7105	910.165
Ch	CoCl3	C[N+](C)(C)CCO.Cl[Co-](Cl)Cl	0.04	4	190	90	-1	5	5392	62.8167	579.395	1.24095	266.693	261.456	51.2463	910.172
C4TMG	Ac	CCCC[N+]=C(N(C)C)N(C)C.CC(=O)[O-]	0.02	4	160	90	-1	5	5305	54.8205	511.341	1.30908	305.593	147.379	58.3685	910.209
C6TMG	FeCl4	CCCCCC[N+]=C(N(C)C)N(C)C.Cl[Fe-](Cl)(Cl)Cl	0.04	4	180	90	-1	5	5013	62.158	566.859	1.25358	269.519	245.655	51.685	910.22
N1111	ZnCl3	C[N+](C)(C)C.Cl[Zn-](Cl)Cl	0.02	6	180	90	-1	5	2044	71.8122	447.919	1.37274	349.929	43.3488	54.6412	910.328
N2222	ZnCl4	CC[N+](CC)(CC)CC.Cl[Zn-2](Cl)(Cl)Cl	0.02	4	180	180	-1	5	5149	79.9147	418.288	1.4027	209.633	98.1274	110.527	910.493
C4TMG	But	CCCC[N+]=C(N(C)C)N(C)C.CCCC(=O)[O-]	0.02	4	170	120	-1	5	5086	61.7918	474.309	1.34707	271.116	125.354	77.8379	910.69
N2222	But	CC[N+](CC)(CC)CC.CCCC(=O)[O-]	0.02	4	160	90	-1	5	5497	54.9482	515.474	1.30603	304.883	152.358	58.2328	910.754
C4TMG	ZnCl3	CCCC[N+]=C(N(C)C)N(C)C.Cl[Zn-](Cl)Cl	0.04	4	180	150	-1	5	4096	76.1498	471.708	1.34989	219.998	163.838	87.8726	910.801
N1111	Ala	C[N+](C)(C)C.CC(C(=O)[O-])N	0.04	4	190	90	-1	5	3946	60.3515	530.082	1.29164	277.587	199.156	53.3396	910.861
C2TMG	ZnCl3	CC[N+]=C(N(C)C)N(C)C.Cl[Zn-](Cl)Cl	0.02	4	180	180	-1	5	3383	78.4035	392.046	1.42973	213.674	65.7144	112.657	910.89
C4TMG	Ac	CCCC[N+]=C(N(C)C)N(C)C.CC(=O)[O-]	0.04	4	180	90	-1	5	5305	62.5936	577.123	1.24486	267.643	258.154	51.3253	910.99
DMIM	ZnCl4	CN1C=C[N+](=C1)C.Cl[Zn-2](Cl)(Cl)Cl	0.04	4	180	150	-1	5	1877	72.4105	402.725	1.4196	231.358	78.9563	92.4103	911.164
N2222	ZnCl3	CC[N+](CC)(CC)CC.Cl[Zn-](Cl)Cl	0.02	4	180	180	-1	5	4258	79.1094	405.392	1.41698	211.767	81.9731	111.652	911.185
DMIM	CoCl4	CN1C=C[N+](=C1)C.Cl[Co-2](Cl)(Cl)Cl	0.06	4	190	120	-1	5	4734	76.1129	567.694	1.2548	220.104	284.175	63.4152	911.245
N1111	ZnCl4	C[N+](C)(C)C.Cl[Zn-2](Cl)(Cl)Cl	0.02	4	180	180	-1	5	2368	77.5014	376.663	1.44638	216.161	46.5335	113.969	911.52
Ch	ZnCl3	C[N+](C)(C)CCO.Cl[Zn-](Cl)Cl	0.1	4	180	120	-1	5	1880	78.7293	455.827	1.36731	212.79	181.838	61.1995	911.571
Ch	ZnCl4	C[N+](C)(C)CCO.Cl[Zn-2](Cl)(Cl)Cl	0.08	4	170	120	-1	5	2102	74.5279	461.139	1.36209	224.785	171.818	64.5361	911.614
DEIM	OH	CC[N]1C=C[N+](=C1)CC.[OH-]	0.02	4	190	90	-1	5	2289	52.274	448.751	1.37469	320.48	66.689	61.5817	911.72
C8TMG	ZnCl3	CCCCCCCC[N+]=C(N(C)C)N(C)C.Cl[Zn-](Cl)Cl	0.02	4	170	150	-1	5	5644	70.5653	453.9	1.36966	237.408	121.812	94.6795	911.78
N1111	ZnCl3	C[N+](C)(C)C.Cl[Zn-](Cl)Cl	0.1	4	190	120	-1	5	2044	79.4232	467.676	1.3559	210.93	195.974	60.772	911.788
TMG	ZnCl4	[N+]=C(N(C)C)N(C)C.Cl[Zn-2](Cl)(Cl)Cl	0.06	4	190	150	-1	5	3192	80.5932	471.985	1.35171	207.868	180.959	83.1579	911.845
C6TMG	For	CCCCCC[N+]=C(N(C)C)N(C)C.C(=O)[O-]	0.02	4	180	120	-1	5	6625	63.0239	502.36	1.3214	265.816	160.094	76.4502	911.881
C2TMG	ZnCl4	CC[N+]=C(N(C)C)N(C)C.Cl[Zn-2](Cl)(Cl)Cl	0.04	4	160	120	-1	5	3985	67.4252	499.699	1.32425	248.465	180.024	71.21	911.977
C8TMG	OH	CCCCCCCC[N+]=C(N(C)C)N(C)C.[OH-]	0.02	4	190	120	-1	5	8374	64.505	532.252	1.29172	259.713	197.712	74.8269	911.985
C2TMG	Ala	CC[N+]=C(N(C)C)N(C)C.CC(C(=O)[O-])N	0.02	4	170	120	-1	5	5200	61.7946	477.097	1.34701	271.104	128.158	77.8344	912.054
C6TMG	Lys	CCCCCC[N+]=C(N(C)C)N(C)C.C(CCN)CC(C(=O)[O-])N	0.02	4	170	120	-1	5	5164	61.7611	476.468	1.34774	271.251	127.34	77.8766	912.104
DMIM	ZnCl3	CN1C=C[N+](=C1)C.Cl[Zn-](Cl)Cl	0.08	4	180	90	-1	5	1706	66.0324	459.747	1.36454	253.705	157.39	48.6524	912.144
C2TMG	ZnCl4	CC[N+]=C(N(C)C)N(C)C.Cl[Zn-2](Cl)(Cl)Cl	0.06	4	170	120	-1	5	3985	74.0848	536.814	1.28801	226.13	245.762	64.9221	912.411
C4TMG	Gly	CCCC[N+]=C(N(C)C)N(C)C.C(C(=O)[O-])N	0.02	4	160	90	-1	5	5491	54.8376	516.348	1.30867	305.498	152.499	58.3503	912.508
C6TMG	MnCl3	CCCCCC[N+]=C(N(C)C)N(C)C.Cl[Mn-](Cl)Cl	0.02	4	190	150	-1	5	5048	70.0765	444.411	1.3807	239.064	109.709	95.6378	912.554
EMIM	FeCl4	CCN1C=C[N+](=C1)C.Cl[Fe-](Cl)(Cl)Cl	0.06	4	190	120	-1	5	2108	69.4259	449.556	1.37566	241.304	138.728	69.5232	912.606
C4TMG	HCO3	CCCC[N+]=C(N(C)C)N(C)C.OC([O-])=O	0.02	4	170	120	-1	5	5227	61.7754	477.911	1.34743	271.189	128.864	77.8586	912.67
Ch	HCO3	C[N+](C)(C)CCO.OC([O-])=O	0.06	4	170	90	-1	5	1984	61.9082	468.819	1.35652	270.607	146.423	51.7895	912.671
Ch	ZnCl3	C[N+](C)(C)CCO.Cl[Zn-](Cl)Cl	0.02	4	170	180	-1	5	1880	76.9411	369.587	1.45612	217.735	37.2129	114.639	912.852
C6TMG	MnCl3	CCCCCC[N+]=C(N(C)C)N(C)C.Cl[Mn-](Cl)Cl	0.04	4	190	120	-1	5	5048	69.2124	533.943	1.29188	242.049	222.157	69.7376	912.912
N1111	ZnCl4	C[N+](C)(C)C.Cl[Zn-2](Cl)(Cl)Cl	0.08	4	180	120	-1	5	2368	75.3352	477.82	1.34805	222.377	191.486	63.9568	912.936
EMIM	FeCl4	CCN1C=C[N+](=C1)C.Cl[Fe-](Cl)(Cl)Cl	0.08	4	190	90	-1	5	2108	67.3267	487.38	1.33879	248.828	190.738	47.8135	913.084
C2TMG	Ser	CC[N+]=C(N(C)C)N(C)C.C(C(C(=O)[O-])N)O	0.04	4	170	90	-1	5	4906	61.7611	565.12	1.26112	271.251	241.956	51.9128	913.119
TMG	Ser	[N+]=C(N(C)C)N(C)C.C(C(C(=O)[O-])N)O	0.02	4	190	120	-1	5	4237	60.9717	459.76	1.36657	274.763	105.834	79.1632	913.167
C4TMG	MnCl3	CCCC[N+]=C(N(C)C)N(C)C.Cl[Mn-](Cl)Cl	0.02	4	190	150	-1	5	4284	69.3871	432.057	1.39441	241.439	94.0296	96.5879	913.235
C2TMG	But	CC[N+]=C(N(C)C)N(C)C.CCCC(=O)[O-]	0.02	4	190	120	-1	5	4231	60.9599	459.699	1.36684	274.816	105.704	79.1784	913.268
EMIM	ZnCl3	CCN1C=C[N+](=C1)C.Cl[Zn-](Cl)Cl	0.06	4	180	120	-1	5	1632	68.1528	425.917	1.40073	245.812	109.409	70.6969	913.325
C6TMG	Ala	CCCCCC[N+]=C(N(C)C)N(C)C.CC(C(=O)[O-])N	0.02	4	180	120	-1	5	6744	63.0225	505.247	1.32143	265.822	162.973	76.452	913.34
N1111	Lys	C[N+](C)(C)C.C(CCN)CC(C(=O)[O-])N	0.06	4	180	90	-1	5	2193	62.4048	480.493	1.34624	268.453	160.559	51.4806	913.367
AMIM	MnCl3	C[N+]1=CN(C=C1)CC=C.Cl[Mn-](Cl)Cl	0.08	4	190	90	-1	5	1989	66.9071	479.601	1.34718	250.388	181.099	48.1133	913.392
C4TMG	Ac	CCCC[N+]=C(N(C)C)N(C)C.CC(=O)[O-]	0.02	4	170	120	-1	5	5305	61.7885	479.732	1.34714	271.131	130.759	77.842	913.438
C2TMG	HCO3	CC[N+]=C(N(C)C)N(C)C.OC([O-])=O	0.02	4	190	120	-1	5	4282	60.99	460.745	1.36616	274.68	106.926	79.1393	913.454
C2TMG	MnCl3	CC[N+]=C(N(C)C)N(C)C.Cl[Mn-](Cl)Cl	0.02	4	170	90	-1	5	3564	53.1934	477.256	1.34972	314.941	102.041	60.2743	913.488
DMIM	CoCl3	CN1C=C[N+](=C1)C.Cl[Co-](Cl)Cl	0.02	4	190	150	-1	5	5308	70.213	449.186	1.37801	238.599	115.135	95.4518	913.599
Ch	Lys	C[N+](C)(C)CCO.C(CCN)CC(C(=O)[O-])N	0.06	4	170	90	-1	5	1993	61.8618	469.835	1.35754	270.81	147.197	51.8283	913.688
DMIM	FeCl4	CN1C=C[N+](=C1)C.Cl[Fe-](Cl)(Cl)Cl	0.06	4	190	120	-1	5	2198	69.5584	454.611	1.37304	240.845	144.375	69.3908	913.823
TMG	ZnCl4	[N+]=C(N(C)C)N(C)C.Cl[Zn-2](Cl)(Cl)Cl	0.02	6	180	90	-1	5	3192	72.4931	467.829	1.35984	346.642	67.0594	54.1279	913.836
N1111	OH	C[N+](C)(C)C.[OH-]	0.02	4	170	120	-1	5	3254	60.0494	441.608	1.38616	278.983	82.5283	80.0964	913.883
Ch	MnCl3	C[N+](C)(C)CCO.Cl[Mn-](Cl)Cl	0.04	4	190	120	-1	5	2028	64.0953	433.053	1.39502	261.373	96.3753	75.3052	914.036
C4TMG	Ser	CCCC[N+]=C(N(C)C)N(C)C.C(C(C(=O)[O-])N)O	0.02	4	160	90	-1	5	5639	54.8655	520.193	1.308	305.342	156.53	58.3205	914.097
Ch	But	C[N+](C)(C)CCO.CCCC(=O)[O-]	0.06	4	180	90	-1	5	2235	62.459	483.149	1.34507	268.22	163.493	51.436	914.112
C8TMG	ZnCl4	CCCCCCCC[N+]=C(N(C)C)N(C)C.Cl[Zn-2](Cl)(Cl)Cl	0.06	4	180	90	-1	5	6559	73.2582	681.604	1.14679	228.681	409.069	43.8536	914.199
C2TMG	Ac	CC[N+]=C(N(C)C)N(C)C.CC(=O)[O-]	0.02	4	190	120	-1	5	4361	60.9813	462.784	1.36636	274.72	108.914	79.1506	914.571
N2222	HCO3	CC[N+](CC)(CC)CC.OC([O-])=O	0.02	4	160	90	-1	5	5725	54.9085	522.171	1.30698	305.104	158.793	58.2749	914.575
BMIM	ZnCl4	CCCCN1C=C[N+](=C1)C.Cl[Zn-2](Cl)(Cl)Cl	0.02	4	190	150	-1	5	1659	67.0994	387.207	1.44196	249.671	37.6549	99.8811	914.582
Ch	For	C[N+](C)(C)CCO.C(=O)[O-]	0.06	4	180	90	-1	5	2256	62.4783	484.535	1.34466	268.138	164.978	51.4201	914.597
N2222	But	CC[N+](CC)(CC)CC.CCCC(=O)[O-]	0.02	4	170	120	-1	5	5497	61.8476	484.002	1.34586	270.872	135.362	77.7677	914.929
Ch	Ac	C[N+](C)(C)CCO.CC(=O)[O-]	0.06	4	170	90	-1	5	2054	61.9253	473.854	1.35615	270.532	151.547	51.7752	915.002
C8TMG	But	CCCCCCCC[N+]=C(N(C)C)N(C)C.CCCC(=O)[O-]	0.02	4	180	120	-1	5	6873	63.0138	508.435	1.32162	265.859	166.113	76.4626	915.025
C4TMG	Asp	CCCC[N+]=C(N(C)C)N(C)C.C(C(C(=O)[O-])N)C(=O)O	0.02	4	180	120	-1	5	6913	63.0444	509.154	1.32097	265.73	166.999	76.4255	915.064
N1111	Asp	C[N+](C)(C)C.C(C(C(=O)[O-])N)C(=O)O	0.02	4	160	90	-1	5	5793	54.9356	523.799	1.30633	304.953	160.599	58.2462	915.067
N2222	CrCl4	CC[N+](CC)(CC)CC.Cl[Cr-](Cl)(Cl)Cl	0.02	4	190	120	-1	5	9313	65.0679	549.626	1.28054	257.466	217.98	74.1796	915.085
DMIM	ZnCl4	CN1C=C[N+](=C1)C.Cl[Zn-2](Cl)(Cl)Cl	0.02	4	190	200	-1	5	1877	83.895	357.998	1.47235	199.687	34.0739	124.237	915.172
N2222	Ac	CC[N+](CC)(CC)CC.CC(=O)[O-]	0.02	4	160	90	-1	5	5825	54.9514	524.534	1.30596	304.865	161.44	58.2294	915.246
N2222	But	CC[N+](CC)(CC)CC.CCCC(=O)[O-]	0.04	4	180	90	-1	5	5497	62.6188	586.231	1.24436	267.536	267.39	51.3047	915.293
Ch	ZnCl3	C[N+](C)(C)CCO.Cl[Zn-](Cl)Cl	0.04	4	190	180	-1	5	1880	81.7071	383.373	1.44724	205.034	70.0845	108.254	915.305
C4TMG	For	CCCC[N+]=C(N(C)C)N(C)C.C(=O)[O-]	0.02	4	160	90	-1	5	5655	54.8037	521.224	1.30948	305.687	157.151	58.3864	915.352
TMG	ZnCl4	[N+]=C(N(C)C)N(C)C.Cl[Zn-2](Cl)(Cl)Cl	0.08	4	180	120	-1	5	3192	77.8755	526.691	1.30408	215.122	249.698	61.8705	915.384
C4TMG	Gly	CCCC[N+]=C(N(C)C)N(C)C.C(C(=O)[O-])N	0.04	4	180	90	-1	5	5491	62.6018	586.098	1.24469	267.608	267.171	51.3186	915.396
EMIM	ZnCl4	CCN1C=C[N+](=C1)C.Cl[Zn-2](Cl)(Cl)Cl	0.04	4	180	150	-1	5	1769	71.8958	401.032	1.42977	233.015	74.946	93.0719	915.399
EMIM	ZnCl4	CCN1C=C[N+](=C1)C.Cl[Zn-2](Cl)(Cl)Cl	0.04	4	190	180	-1	5	1769	81.5045	380.177	1.45084	205.544	66.1104	108.523	915.507
C4TMG	Lys	CCCC[N+]=C(N(C)C)N(C)C.C(CCN)CC(C(=O)[O-])N	0.02	4	190	120	-1	5	4371	60.9236	463.473	1.36765	274.98	109.267	79.2256	915.562
Ch	Arg	C[N+](C)(C)CCO.C(CC(C(=O)[O-])N)CN=C(N)N	0.02	4	180	120	-1	5	6996	63.0773	510.893	1.32028	265.591	168.916	76.3856	915.589
C8TMG	ZnCl3	CCCCCCCC[N+]=C(N(C)C)N(C)C.Cl[Zn-](Cl)Cl	0.04	4	170	120	-1	5	5644	69.9457	554.057	1.27713	239.511	245.782	68.764	915.594
C4TMG	Gly	CCCC[N+]=C(N(C)C)N(C)C.C(C(=O)[O-])N	0.02	4	170	120	-1	5	5491	61.7967	484.252	1.34696	271.095	135.326	77.8317	915.608
AMIM	ZnCl3	C[N+]1=CN(C=C1)CC=C.Cl[Zn-](Cl)Cl	0.1	4	190	90	-1	5	1852	71.1552	478.879	1.35237	235.44	198.198	45.2409	915.624
N1111	OH	C[N+](C)(C)C.[OH-]	0.06	4	180	90	-1	5	3254	64.8956	536.75	1.29457	258.149	229.096	49.5047	915.66
TMG	MnCl3	[N+]=C(N(C)C)N(C)C.Cl[Mn-](Cl)Cl	0.06	4	190	90	-1	5	2892	64.012	518.422	1.31294	261.713	206.42	50.2893	915.683
DEIM	CoCl3	CC[N]1C=C[N+](=C1)CC.Cl[Co-](Cl)Cl	0.02	4	180	90	-1	5	5047	54.3156	509.096	1.32242	308.434	141.515	59.1476	915.759
N1111	ZnCl4	C[N+](C)(C)C.Cl[Zn-2](Cl)(Cl)Cl	0.04	4	170	150	-1	5	2368	72.8266	420.817	1.41078	230.036	99.0411	91.7396	915.799
C4TMG	CoCl3	CCCC[N+]=C(N(C)C)N(C)C.Cl[Co-](Cl)Cl	0.02	4	170	90	-1	5	6951	55.8711	546.708	1.28503	299.847	189.476	57.3856	915.87
EMIM	ZnCl3	CCN1C=C[N+](=C1)C.Cl[Zn-](Cl)Cl	0.08	4	180	90	-1	5	1632	65.5162	456.489	1.37529	255.704	151.749	49.0358	915.89
N2222	OH	CC[N+](CC)(CC)CC.[OH-]	0.04	4	190	90	-1	5	7333	65.6391	644.553	1.18759	255.225	340.285	49.0427	916.071
N1111	Leu	C[N+](C)(C)C.CC(C)CC(C(=O)[O-])N	0.02	4	180	120	-1	5	6994	63.0412	511.137	1.32104	265.743	168.964	76.4293	916.089
C8TMG	NiCl4	CCCCCCCC[N+]=C(N(C)C)N(C)C.Cl[Ni-2](Cl)(Cl)Cl	0.02	4	180	90	-1	5	8296	56.9917	572.014	1.26033	293.951	221.693	56.3703	916.17
BMIM	ZnCl3	CCCCN1C=C[N+](=C1)C.Cl[Zn-](Cl)Cl	0.02	4	190	150	-1	5	1558	66.898	386.073	1.4463	250.423	35.4689	100.182	916.185
C8TMG	MnCl3	CCCCCCCC[N+]=C(N(C)C)N(C)C.Cl[Mn-](Cl)Cl	0.02	4	190	150	-1	5	5846	70.4606	459.236	1.37317	237.761	126.359	95.1164	916.203
C8TMG	ZnCl3	CCCCCCCC[N+]=C(N(C)C)N(C)C.Cl[Zn-](Cl)Cl	0.04	4	160	90	-1	5	5644	62.756	591.879	1.24062	266.951	273.94	50.9878	916.248
DEIM	MnCl3	CC[N]1C=C[N+](=C1)CC.Cl[Mn-](Cl)Cl	0.06	4	190	120	-1	5	1924	68.6857	442.161	1.39048	243.905	127.983	70.2724	916.321
N1111	ZnCl3	C[N+](C)(C)C.Cl[Zn-](Cl)Cl	0.08	4	170	120	-1	5	2044	73.9456	459.992	1.37282	226.555	168.392	65.0443	916.404
N1111	HCO3	C[N+](C)(C)C.OC([O-])=O	0.06	4	180	90	-1	5	2307	62.4705	488.325	1.34483	268.171	168.728	51.4264	916.575
DEIM	CoCl4	CC[N]1C=C[N+](=C1)CC.Cl[Co-2](Cl)(Cl)Cl	0.02	4	180	120	-1	5	4469	60.9085	465.898	1.3673	275.048	111.745	79.1054	916.597
C2TMG	ZnCl3	CC[N+]=C(N(C)C)N(C)C.Cl[Zn-](Cl)Cl	0.1	4	190	90	-1	5	3383	77.4352	590.598	1.24269	216.346	332.681	41.5718	916.645
TMG	Leu	[N+]=C(N(C)C)N(C)C.CC(C)CC(C(=O)[O-])N	0.02	4	180	120	-1	5	6971	62.9827	511.055	1.32227	265.99	168.565	76.5003	916.661
DEIM	FeCl4	CC[N]1C=C[N+](=C1)CC.Cl[Fe-](Cl)(Cl)Cl	0.08	4	190	90	-1	5	2233	67.4782	497.57	1.33578	248.269	201.595	47.7061	916.676
TMG	ZnCl3	[N+]=C(N(C)C)N(C)C.Cl[Zn-](Cl)Cl	0.06	4	180	150	-1	5	2717	78.9473	454.203	1.37923	212.202	157.242	84.7589	916.714
AMIM	CrCl4	C[N+]1=CN(C=C1)CC=C.Cl[Cr-](Cl)(Cl)Cl	0.02	4	190	120	-1	5	7187	63.1819	514.786	1.31877	265.152	173.24	76.3939	916.778
TMG	NiCl4	[N+]=C(N(C)C)N(C)C.Cl[Ni-2](Cl)(Cl)Cl	0.02	4	190	90	-1	5	5795	54.8969	524.576	1.30901	305.168	160.768	58.6394	916.792
C4TMG	MnCl3	CCCC[N+]=C(N(C)C)N(C)C.Cl[Mn-](Cl)Cl	0.06	4	190	90	-1	5	4284	67.4009	586.716	1.24693	248.554	290.401	47.7608	916.823
C2TMG	ZnCl3	CC[N+]=C(N(C)C)N(C)C.Cl[Zn-](Cl)Cl	0.08	4	190	120	-1	5	3383	78.4152	538.014	1.29564	213.642	262.819	61.5533	916.829
TMG	CrCl4	[N+]=C(N(C)C)N(C)C.Cl[Cr-](Cl)(Cl)Cl	0.02	4	190	120	-1	5	8146	63.9741	531.241	1.30244	261.868	193.925	75.4478	916.839
TMG	Ala	[N+]=C(N(C)C)N(C)C.CC(C(=O)[O-])N	0.02	4	190	120	-1	5	4521	60.9624	466.925	1.36678	274.805	112.945	79.1752	916.854
Ch	ZnCl3	C[N+](C)(C)CCO.Cl[Zn-](Cl)Cl	0.04	6	190	90	-1	5	1880	76.0731	457.308	1.37654	330.329	75.275	51.7039	916.925
TMG	ZnCl4	[N+]=C(N(C)C)N(C)C.Cl[Zn-2](Cl)(Cl)Cl	0.1	4	180	90	-1	5	3192	76.5798	578.118	1.25615	218.762	317.404	41.9515	917.135
C4TMG	ZnCl3	CCCC[N+]=C(N(C)C)N(C)C.Cl[Zn-](Cl)Cl	0.02	6	190	90	-1	5	4096	73.0106	483.499	1.35084	344.185	85.4414	53.8727	917.172
TMG	MnCl3	[N+]=C(N(C)C)N(C)C.Cl[Mn-](Cl)Cl	0.04	4	190	120	-1	5	2892	65.3068	465.317	1.36914	256.524	134.885	73.9082	917.23
C4TMG	Ser	CCCC[N+]=C(N(C)C)N(C)C.C(C(C(=O)[O-])N)O	0.02	4	170	120	-1	5	5639	61.8077	487.813	1.34672	271.047	138.948	77.8178	917.268
C6TMG	ZnCl4	CCCCCC[N+]=C(N(C)C)N(C)C.Cl[Zn-2](Cl)(Cl)Cl	0.06	4	170	90	-1	5	5675	70.786	648.259	1.18639	236.668	366.297	45.2942	917.326
N2222	MnCl3	CC[N+](CC)(CC)CC.Cl[Mn-](Cl)Cl	0.02	4	180	120	-1	5	4478	60.8657	466.451	1.36826	275.241	112.048	79.161	917.354
N2222	NiCl4	CC[N+](CC)(CC)CC.Cl[Ni-2](Cl)(Cl)Cl	0.02	4	190	90	-1	5	7598	56.3527	559.751	1.27519	297.284	205.342	57.1245	917.47
EMIM	CoCl3	CCN1C=C[N+](=C1)C.Cl[Co-](Cl)Cl	0.04	4	190	120	-1	5	5050	68.8718	536.672	1.29827	243.246	223.344	70.0826	917.472
N1111	CrCl4	C[N+](C)(C)C.Cl[Cr-](Cl)(Cl)Cl	0.02	4	190	90	-1	5	8340	56.9526	573.697	1.26176	294.153	223.021	56.5228	917.727
Ch	ZnCl4	C[N+](C)(C)CCO.Cl[Zn-2](Cl)(Cl)Cl	0.08	4	160	90	-1	5	2102	66.9007	489.648	1.34588	250.413	191.406	47.8289	917.761
N2222	Gly	CC[N+](CC)(CC)CC.C(C(=O)[O-])N	0.02	4	160	90	-1	5	6010	54.954	529.636	1.3059	304.851	166.559	58.2266	917.766
Ch	Asp	C[N+](C)(C)CCO.C(C(C(=O)[O-])N)C(=O)O	0.04	4	170	90	-1	5	5125	61.8105	575.461	1.26011	271.035	252.555	51.8714	917.786
C4TMG	But	CCCC[N+]=C(N(C)C)N(C)C.CCCC(=O)[O-]	0.04	4	170	90	-1	5	5086	61.7392	574.201	1.26157	271.348	250.922	51.9313	917.883
C4TMG	For	CCCC[N+]=C(N(C)C)N(C)C.C(=O)[O-]	0.02	4	170	120	-1	5	5655	61.7758	488.46	1.34742	271.187	139.415	77.8581	917.94
N1111	OH	C[N+](C)(C)C.[OH-]	0.02	4	190	150	-1	5	3254	68.1762	416.722	1.41918	245.728	72.6907	98.3035	917.952
N2222	HCO3	CC[N+](CC)(CC)CC.OC([O-])=O	0.02	4	170	120	-1	5	5725	61.8328	489.733	1.34618	270.937	141.01	77.7863	917.955
C2TMG	But	CC[N+]=C(N(C)C)N(C)C.CCCC(=O)[O-]	0.04	4	190	90	-1	5	4231	60.3527	544.455	1.29161	277.581	213.536	53.3385	918.034
C2TMG	Gly	CC[N+]=C(N(C)C)N(C)C.C(C(=O)[O-])N	0.02	4	190	120	-1	5	4637	60.9741	469.733	1.36652	274.752	115.821	79.16	918.126
TMG	Ser	[N+]=C(N(C)C)N(C)C.C(C(C(=O)[O-])N)O	0.04	4	190	90	-1	5	4237	60.3546	544.741	1.29157	277.573	213.832	53.3368	918.157
DMIM	ZnCl3	CN1C=C[N+](=C1)C.Cl[Zn-](Cl)Cl	0.04	4	180	150	-1	5	1706	71.5714	400.169	1.43625	234.071	72.6046	93.4939	918.208
C4TMG	FeCl4	CCCC[N+]=C(N(C)C)N(C)C.Cl[Fe-](Cl)(Cl)Cl	0.04	4	180	90	-1	5	4321	60.4683	547.84	1.28861	277.05	217.661	53.1292	918.225
C8TMG	HCO3	CCCCCCCC[N+]=C(N(C)C)N(C)C.OC([O-])=O	0.02	4	180	120	-1	5	7149	63.0148	515.097	1.32159	265.855	172.781	76.4613	918.346
C2TMG	ZnCl3	CC[N+]=C(N(C)C)N(C)C.Cl[Zn-](Cl)Cl	0.04	4	170	150	-1	5	3383	74.3016	454.073	1.38278	225.47	138.685	89.9186	918.425
N1111	Asp	C[N+](C)(C)C.C(C(C(=O)[O-])N)C(=O)O	0.02	4	170	120	-1	5	5793	61.8486	491.283	1.34583	270.868	142.649	77.7664	918.558
N2222	Lys	CC[N+](CC)(CC)CC.C(CCN)CC(C(=O)[O-])N	0.02	4	190	120	-1	5	4590	60.9025	469.11	1.36813	275.075	114.781	79.253	918.618
C2TMG	For	CC[N+]=C(N(C)C)N(C)C.C(=O)[O-]	0.02	4	190	120	-1	5	4693	60.9875	471.028	1.36622	274.692	117.194	79.1426	918.624
DEIM	ZnCl4	CC[N]1C=C[N+](=C1)CC.Cl[Zn-2](Cl)(Cl)Cl	0.06	4	180	120	-1	5	1966	68.5892	445.456	1.39182	244.248	130.961	70.2471	918.638
DEIM	CoCl3	CC[N]1C=C[N+](=C1)CC.Cl[Co-](Cl)Cl	0.04	4	190	120	-1	5	5047	68.7754	537.292	1.30009	243.587	223.524	70.1808	918.692
N2222	ZnCl3	CC[N+](CC)(CC)CC.Cl[Zn-](Cl)Cl	0.04	4	160	120	-1	5	4258	67.3803	512.372	1.32514	248.63	192.485	71.2574	918.754
C4TMG	Ala	CCCC[N+]=C(N(C)C)N(C)C.CC(C(=O)[O-])N	0.02	4	160	90	-1	5	5947	54.8401	528.987	1.30861	305.484	165.156	58.3476	918.798
N2222	Ser	CC[N+](CC)(CC)CC.C(C(C(=O)[O-])N)O	0.02	4	160	90	-1	5	6118	54.979	532.388	1.3053	304.712	169.475	58.2002	918.845
N2222	Ac	CC[N+](CC)(CC)CC.CC(=O)[O-]	0.02	4	170	120	-1	5	5825	61.8541	492.027	1.34571	270.843	143.424	77.7595	918.87
DEIM	CoCl4	CC[N]1C=C[N+](=C1)CC.Cl[Co-2](Cl)(Cl)Cl	0.08	4	190	90	-1	5	4469	74.7257	631.599	1.20623	224.19	364.329	43.0792	918.913
C2TMG	HCO3	CC[N+]=C(N(C)C)N(C)C.OC([O-])=O	0.04	4	190	90	-1	5	4282	60.3791	546.79	1.29105	277.46	216.015	53.3151	918.918
N2222	OH	CC[N+](CC)(CC)CC.[OH-]	0.04	4	180	90	-1	5	7333	65.4114	646.698	1.19123	256.114	341.47	49.1144	918.965
C4TMG	Ser	CCCC[N+]=C(N(C)C)N(C)C.C(C(C(=O)[O-])N)O	0.04	4	180	90	-1	5	5639	62.6011	593.305	1.24471	267.611	274.375	51.3192	919.006
Ch	ZnCl4	C[N+](C)(C)CCO.Cl[Zn-2](Cl)(Cl)Cl	0.12	4	180	90	-1	5	2102	76.9605	509.004	1.32909	217.68	249.58	41.744	919.049
C4TMG	OH	CCCC[N+]=C(N(C)C)N(C)C.[OH-]	0.02	4	170	120	-1	5	6368	62.2892	501.866	1.33631	268.951	155.698	77.2163	919.089
C4TMG	ZnCl3	CCCC[N+]=C(N(C)C)N(C)C.Cl[Zn-](Cl)Cl	0.02	4	190	180	-1	5	4096	78.3324	406.422	1.43182	213.868	79.6366	112.918	919.12
EMIM	CoCl3	CCN1C=C[N+](=C1)C.Cl[Co-](Cl)Cl	0.02	4	190	150	-1	5	5050	69.5772	447.644	1.39061	240.78	110.54	96.3241	919.125
C8TMG	Ac	CCCCCCCC[N+]=C(N(C)C)N(C)C.CC(=O)[O-]	0.02	4	180	120	-1	5	7224	63.0159	516.9	1.32157	265.85	174.591	76.4599	919.235
C8TMG	Ser	CCCCCCCC[N+]=C(N(C)C)N(C)C.C(C(C(=O)[O-])N)O	0.02	4	180	120	-1	5	7242	63.0282	517.235	1.32131	265.798	174.992	76.445	919.274
C2TMG	ZnCl4	CC[N+]=C(N(C)C)N(C)C.Cl[Zn-2](Cl)(Cl)Cl	0.04	4	170	150	-1	5	3985	75.2292	472.849	1.36573	222.69	161.349	88.8098	919.288
DEIM	ZnCl3	CC[N]1C=C[N+](=C1)CC.Cl[Zn-](Cl)Cl	0.06	4	190	150	-1	5	1790	76.4483	413.785	1.42499	219.139	106.979	87.6665	919.388
C6TMG	But	CCCCCC[N+]=C(N(C)C)N(C)C.CCCC(=O)[O-]	0.02	4	160	90	-1	5	5969	54.8218	529.775	1.30905	305.586	165.822	58.3671	919.41
DMIM	CoCl4	CN1C=C[N+](=C1)C.Cl[Co-2](Cl)(Cl)Cl	0.08	4	190	90	-1	5	4734	75.5515	646.063	1.19304	221.74	381.715	42.6083	919.553
C4TMG	For	CCCC[N+]=C(N(C)C)N(C)C.C(=O)[O-]	0.04	4	180	90	-1	5	5655	62.5852	594.235	1.24502	267.68	275.223	51.3322	919.63
DEIM	CoCl4	CC[N]1C=C[N+](=C1)CC.Cl[Co-2](Cl)(Cl)Cl	0.06	4	190	120	-1	5	4469	74.7559	561.802	1.27757	224.1	273.137	64.5662	919.688
N1111	ZnCl3	C[N+](C)(C)C.Cl[Zn-](Cl)Cl	0.08	4	160	90	-1	5	2044	66.5614	486.835	1.35274	251.689	187.074	48.0727	919.785
DMIM	CoCl3	CN1C=C[N+](=C1)C.Cl[Co-](Cl)Cl	0.04	4	190	120	-1	5	5308	69.1257	546.069	1.2935	242.352	233.892	69.8251	919.785
N1111	Ac	C[N+](C)(C)C.CC(=O)[O-]	0.06	4	180	90	-1	5	2398	62.4766	494.933	1.34469	268.145	175.367	51.4214	919.814
Ch	NiCl4	C[N+](C)(C)CCO.Cl[Ni-2](Cl)(Cl)Cl	0.02	4	190	90	-1	5	4815	53.9034	506.555	1.33313	310.793	136.042	59.7202	919.844
C6TMG	ZnCl4	CCCCCC[N+]=C(N(C)C)N(C)C.Cl[Zn-2](Cl)(Cl)Cl	0.04	4	190	150	-1	5	5675	78.0458	522.008	1.31777	214.653	221.483	85.8722	919.889
Ch	ZnCl4	C[N+](C)(C)CCO.Cl[Zn-2](Cl)(Cl)Cl	0.02	4	170	180	-1	5	2102	76.5318	375.982	1.4639	218.899	41.8297	115.252	919.943
C8TMG	Gly	CCCCCCCC[N+]=C(N(C)C)N(C)C.C(C(=O)[O-])N	0.02	4	180	120	-1	5	7280	63.0134	518.275	1.32162	265.86	175.951	76.463	919.949
Ch	Leu	C[N+](C)(C)CCO.CC(C)CC(C(=O)[O-])N	0.02	4	160	90	-1	5	6166	54.9511	533.989	1.30597	304.867	170.892	58.2298	919.977
C2TMG	Leu	CC[N+]=C(N(C)C)N(C)C.CC(C)CC(C(=O)[O-])N	0.02	4	180	120	-1	5	7285	63.0125	518.403	1.32164	265.864	176.075	76.4641	920.023
C8TMG	Lys	CCCCCCCC[N+]=C(N(C)C)N(C)C.C(CCN)CC(C(=O)[O-])N	0.02	4	160	90	-1	5	5988	54.7995	530.519	1.30958	305.71	166.418	58.3908	920.048
C6TMG	Lys	CCCCCC[N+]=C(N(C)C)N(C)C.C(CCN)CC(C(=O)[O-])N	0.04	4	170	90	-1	5	5164	61.7137	578.288	1.26209	271.459	254.876	51.9527	920.187
C2TMG	ZnCl4	CC[N+]=C(N(C)C)N(C)C.Cl[Zn-2](Cl)(Cl)Cl	0.02	6	180	90	-1	5	3985	72.6439	483.484	1.35702	345.922	83.5455	54.0156	920.252
DMIM	CrCl4	CN1C=C[N+](=C1)C.Cl[Cr-](Cl)(Cl)Cl	0.02	4	190	120	-1	5	7529	63.2227	522.692	1.31792	264.98	181.367	76.3446	920.305
DEIM	FeCl4	CC[N]1C=C[N+](=C1)CC.Cl[Fe-](Cl)(Cl)Cl	0.06	4	190	120	-1	5	2233	69.1515	459.598	1.38111	242.262	147.537	69.799	920.356
AMIM	ZnCl3	C[N+]1=CN(C=C1)CC=C.Cl[Zn-](Cl)Cl	0.06	4	190	150	-1	5	1852	76.5212	417.093	1.42364	218.93	110.58	87.5831	920.364
C2TMG	MnCl3	CC[N+]=C(N(C)C)N(C)C.Cl[Mn-](Cl)Cl	0.02	4	190	150	-1	5	3564	68.2512	423.181	1.41762	245.457	79.5282	98.1954	920.401
DMIM	NiCl4	CN1C=C[N+](=C1)C.Cl[Ni-2](Cl)(Cl)Cl	0.04	4	180	90	-1	5	4682	60.9177	561.85	1.2791	275.007	234.106	52.7374	920.477
Ch	ZnCl4	C[N+](C)(C)CCO.Cl[Zn-2](Cl)(Cl)Cl	0.04	4	190	180	-1	5	2102	81.6055	392.136	1.44904	205.29	78.458	108.389	920.588
Ch	OH	C[N+](C)(C)CCO.[OH-]	0.02	4	190	150	-1	5	2579	67.4198	406.149	1.4351	248.484	58.2583	99.4063	920.626
C2TMG	Ala	CC[N+]=C(N(C)C)N(C)C.CC(C(=O)[O-])N	0.04	4	170	90	-1	5	5200	61.7389	579.828	1.26157	271.349	256.548	51.9315	920.7
C8TMG	ZnCl4	CCCCCCCC[N+]=C(N(C)C)N(C)C.Cl[Zn-2](Cl)(Cl)Cl	0.04	4	170	120	-1	5	6559	71.0643	584.555	1.25703	235.741	281.132	67.6816	920.792
N1111	OH	C[N+](C)(C)C.[OH-]	0.04	4	180	120	-1	5	3254	65.6251	479.733	1.36186	255.28	151.033	73.42	920.794
N2222	HCO3	CC[N+](CC)(CC)CC.OC([O-])=O	0.04	4	180	90	-1	5	5725	62.6216	597.294	1.2443	267.524	278.468	51.3024	920.797
TMG	MnCl3	[N+]=C(N(C)C)N(C)C.Cl[Mn-](Cl)Cl	0.02	4	180	120	-1	5	2892	59.3249	437.85	1.4038	282.39	74.243	81.2171	920.823
TMG	Asp	[N+]=C(N(C)C)N(C)C.C(C(C(=O)[O-])N)C(=O)O	0.02	4	160	90	-1	5	5966	54.7333	530.548	1.31116	306.08	166.007	58.4614	920.855
C2TMG	Ac	CC[N+]=C(N(C)C)N(C)C.CC(=O)[O-]	0.04	4	190	90	-1	5	4361	60.3681	550.876	1.29128	277.51	220.04	53.3249	921.079
TMG	MnCl3	[N+]=C(N(C)C)N(C)C.Cl[Mn-](Cl)Cl	0.04	4	180	90	-1	5	2892	57.9157	496.831	1.34541	289.261	152.099	55.4709	921.118
N2222	Gly	CC[N+](CC)(CC)CC.C(C(=O)[O-])N	0.02	4	170	120	-1	5	6010	61.856	496.567	1.34567	270.835	147.974	77.7571	921.12
C4TMG	Ala	CCCC[N+]=C(N(C)C)N(C)C.CC(C(=O)[O-])N	0.02	4	170	120	-1	5	5947	61.7948	495.506	1.34701	271.103	146.568	77.8341	921.256
N1111	ZnCl4	C[N+](C)(C)C.Cl[Zn-2](Cl)(Cl)Cl	0.02	4	160	150	-1	5	2368	67.0977	402.845	1.43968	249.677	53.7487	99.4189	921.263
C2TMG	CoCl3	CC[N+]=C(N(C)C)N(C)C.Cl[Co-](Cl)Cl	0.02	4	180	120	-1	5	6482	62.262	505.01	1.33757	269.069	158.555	77.3858	921.291
N1111	Lys	C[N+](C)(C)C.C(CCN)CC(C(=O)[O-])N	0.06	4	170	90	-1	5	2193	61.8463	484.728	1.35788	270.878	162.009	51.8413	921.305
C4TMG	HCO3	CCCC[N+]=C(N(C)C)N(C)C.OC([O-])=O	0.04	4	170	90	-1	5	5227	61.7269	581.273	1.26182	271.401	257.93	51.9416	921.544
AMIM	ZnCl4	C[N+]1=CN(C=C1)CC=C.Cl[Zn-2](Cl)(Cl)Cl	0.1	4	190	90	-1	5	2047	71.5005	497.333	1.34584	234.303	218.008	45.0223	921.585
Ch	MnCl3	C[N+](C)(C)CCO.Cl[Mn-](Cl)Cl	0.04	4	180	90	-1	5	2028	56.4564	463.059	1.38018	296.738	109.416	56.9048	921.62
C2TMG	Ser	CC[N+]=C(N(C)C)N(C)C.C(C(C(=O)[O-])N)O	0.02	4	190	120	-1	5	4906	60.9636	476.534	1.36676	274.8	122.561	79.1737	921.645
C6TMG	But	CCCCCC[N+]=C(N(C)C)N(C)C.CCCC(=O)[O-]	0.02	4	170	120	-1	5	5969	61.7769	496.192	1.3474	271.182	147.153	77.8566	921.794
EMIM	NiCl4	CCN1C=C[N+](=C1)C.Cl[Ni-2](Cl)(Cl)Cl	0.04	4	180	90	-1	5	4386	60.3414	552.274	1.29132	277.633	221.4	53.241	921.797
Ch	But	C[N+](C)(C)CCO.CCCC(=O)[O-]	0.06	4	170	90	-1	5	2235	61.9051	487.368	1.35659	270.62	164.955	51.7921	921.98
C2TMG	OH	CC[N+]=C(N(C)C)N(C)C.[OH-]	0.04	4	170	90	-1	5	5363	61.9195	586.155	1.25789	270.557	263.818	51.78	922.023
N2222	For	CC[N+](CC)(CC)CC.C(=O)[O-]	0.02	4	160	90	-1	5	6298	54.9361	537.794	1.30632	304.95	174.598	58.2456	922.058
BMIM	NiCl4	CCCCN1C=C[N+](=C1)C.Cl[Ni-2](Cl)(Cl)Cl	0.02	4	190	90	-1	5	3968	53.0705	490.198	1.35405	315.67	113.871	60.6574	922.126
C2TMG	ZnCl4	CC[N+]=C(N(C)C)N(C)C.Cl[Zn-2](Cl)(Cl)Cl	0.02	4	160	150	-1	5	3985	68.3672	431.386	1.41295	245.041	88.7717	97.5728	922.167
C4TMG	Lys	CCCC[N+]=C(N(C)C)N(C)C.C(CCN)CC(C(=O)[O-])N	0.04	4	190	90	-1	5	4371	60.3134	551.88	1.29245	277.762	220.745	53.3732	922.167
Ch	ZnCl3	C[N+](C)(C)CCO.Cl[Zn-](Cl)Cl	0.06	4	170	150	-1	5	1880	76.3702	419.319	1.42509	219.363	112.473	87.4829	922.204
N2222	Asp	CC[N+](CC)(CC)CC.C(C(C(=O)[O-])N)C(=O)O	0.02	4	180	120	-1	5	7540	63.0697	524.09	1.32044	265.623	182.073	76.3947	922.267
N2222	Ser	CC[N+](CC)(CC)CC.C(C(C(=O)[O-])N)O	0.02	4	170	120	-1	5	6118	61.8672	499.135	1.34543	270.786	150.606	77.743	922.282
C8TMG	FeCl4	CCCCCCCC[N+]=C(N(C)C)N(C)C.Cl[Fe-](Cl)(Cl)Cl	0.02	4	190	150	-1	5	5745	69.9126	460.636	1.38393	239.624	125.149	95.862	922.284
N2222	ZnCl4	CC[N+](CC)(CC)CC.Cl[Zn-2](Cl)(Cl)Cl	0.08	4	180	90	-1	5	5149	76.6721	669.509	1.17518	218.499	409.109	41.901	922.347
TMG	Asp	[N+]=C(N(C)C)N(C)C.C(C(C(=O)[O-])N)C(=O)O	0.02	4	170	120	-1	5	5966	61.7352	496.453	1.34831	271.365	147.179	77.9093	922.38
N1111	Asp	C[N+](C)(C)C.C(C(C(=O)[O-])N)C(=O)O	0.04	4	180	90	-1	5	5793	62.6242	600.577	1.24425	267.513	281.764	51.3003	922.413
C8TMG	Lys	CCCCCCCC[N+]=C(N(C)C)N(C)C.C(CCN)CC(C(=O)[O-])N	0.02	4	170	120	-1	5	5988	61.75	496.877	1.34798	271.3	147.686	77.8906	922.43
AMIM	CoCl4	C[N+]1=CN(C=C1)CC=C.Cl[Co-2](Cl)(Cl)Cl	0.04	4	180	90	-1	5	4574	60.6072	559.3	1.28566	276.415	229.877	53.0075	922.478
Ch	For	C[N+](C)(C)CCO.C(=O)[O-]	0.06	4	170	90	-1	5	2256	61.9208	488.793	1.35625	270.552	166.463	51.7789	922.52
DMIM	CoCl4	CN1C=C[N+](=C1)C.Cl[Co-2](Cl)(Cl)Cl	0.02	6	190	90	-1	5	4734	73.1124	496.116	1.34896	343.706	98.6123	53.7977	922.539
C6TMG	Asp	CCCCCC[N+]=C(N(C)C)N(C)C.C(C(C(=O)[O-])N)C(=O)O	0.02	4	180	120	-1	5	7522	63.034	523.952	1.32119	265.773	181.741	76.438	922.572
N2222	ZnCl3	CC[N+](CC)(CC)CC.Cl[Zn-](Cl)Cl	0.06	4	170	120	-1	5	4258	73.9397	554.737	1.29054	226.574	263.114	65.0495	922.636
EMIM	ZnCl4	CCN1C=C[N+](=C1)C.Cl[Zn-2](Cl)(Cl)Cl	0.08	4	180	90	-1	5	1769	65.4849	469.452	1.37595	255.827	164.566	49.0592	922.701
C4TMG	ZnCl4	CCCC[N+]=C(N(C)C)N(C)C.Cl[Zn-2](Cl)(Cl)Cl	0.08	4	180	90	-1	5	4814	75.5344	652.575	1.19289	221.79	388.253	42.5321	922.73
DMIM	ZnCl3	CN1C=C[N+](=C1)C.Cl[Zn-](Cl)Cl	0.04	4	190	180	-1	5	1706	80.7559	381.326	1.46429	207.45	64.3471	109.529	922.806
DMIM	FeCl4	CN1C=C[N+](=C1)C.Cl[Fe-](Cl)(Cl)Cl	0.08	4	190	90	-1	5	2198	66.9032	498.66	1.34726	250.403	200.14	48.1161	922.961
N2222	Ac	CC[N+](CC)(CC)CC.CC(=O)[O-]	0.04	4	180	90	-1	5	5825	62.6291	602.086	1.24415	267.492	283.298	51.2962	923.118
C6TMG	HCO3	CCCCCC[N+]=C(N(C)C)N(C)C.OC([O-])=O	0.02	4	160	90	-1	5	6184	54.7757	536.198	1.31015	305.843	171.939	58.4161	923.172
C2TMG	ZnCl4	CC[N+]=C(N(C)C)N(C)C.Cl[Zn-2](Cl)(Cl)Cl	0.06	4	160	90	-1	5	3985	66.1343	577.004	1.26936	253.314	275.307	48.3832	923.181
Ch	Leu	C[N+](C)(C)CCO.CC(C)CC(C(=O)[O-])N	0.02	4	170	120	-1	5	6166	61.8382	500.552	1.34606	270.913	151.859	77.7795	923.306
DMIM	CoCl4	CN1C=C[N+](=C1)C.Cl[Co-2](Cl)(Cl)Cl	0.04	4	190	150	-1	5	4734	76.202	497.025	1.34965	219.847	189.228	87.9499	923.339
C4TMG	Ac	CCCC[N+]=C(N(C)C)N(C)C.CC(=O)[O-]	0.04	4	170	90	-1	5	5305	61.732	585.074	1.26171	271.379	261.758	51.9373	923.394
C8TMG	Ala	CCCCCCCC[N+]=C(N(C)C)N(C)C.CC(C(=O)[O-])N	0.02	4	180	120	-1	5	7576	63.0193	525.379	1.3215	265.835	183.088	76.4558	923.439
C4TMG	ZnCl4	CCCC[N+]=C(N(C)C)N(C)C.Cl[Zn-2](Cl)(Cl)Cl	0.02	4	180	180	-1	5	4814	78.5156	419.243	1.42769	213.369	93.3779	112.497	923.468
C2TMG	ZnCl4	CC[N+]=C(N(C)C)N(C)C.Cl[Zn-2](Cl)(Cl)Cl	0.08	4	170	90	-1	5	3985	72.7127	608.357	1.23874	230.397	333.866	44.094	923.546
Ch	ZnCl4	C[N+](C)(C)CCO.Cl[Zn-2](Cl)(Cl)Cl	0.06	4	160	120	-1	5	2102	68.5037	454.837	1.39233	244.553	140.195	70.0888	923.585
C6TMG	FeCl4	CCCCCC[N+]=C(N(C)C)N(C)C.Cl[Fe-](Cl)(Cl)Cl	0.02	4	190	150	-1	5	5013	69.2093	449.209	1.398	242.06	110.313	96.8361	923.603
DMIM	NiCl4	CN1C=C[N+](=C1)C.Cl[Ni-2](Cl)(Cl)Cl	0.02	4	180	120	-1	5	4682	60.6181	473.482	1.37385	276.366	117.631	79.4845	923.664
C6TMG	Ac	CCCCCC[N+]=C(N(C)C)N(C)C.CC(=O)[O-]	0.02	4	160	90	-1	5	6260	54.8088	537.987	1.30936	305.658	173.947	58.3809	923.671
C2TMG	ZnCl3	CC[N+]=C(N(C)C)N(C)C.Cl[Zn-](Cl)Cl	0.02	6	180	90	-1	5	3383	71.8761	475.892	1.37152	349.618	71.6822	54.5926	923.704
C4TMG	But	CCCC[N+]=C(N(C)C)N(C)C.CCCC(=O)[O-]	0.02	4	190	120	-1	5	5086	60.9687	480.99	1.36664	274.777	127.047	79.167	923.816
N1111	ZnCl3	C[N+](C)(C)C.Cl[Zn-](Cl)Cl	0.12	4	180	90	-1	5	2044	76.2733	506.641	1.34107	219.641	244.88	42.1201	923.855
Ch	ZnCl3	C[N+](C)(C)CCO.Cl[Zn-](Cl)Cl	0.08	4	190	150	-1	5	1880	81.1465	430.179	1.41756	206.451	141.137	82.5908	923.87
C8TMG	For	CCCCCCCC[N+]=C(N(C)C)N(C)C.C(=O)[O-]	0.02	4	180	120	-1	5	7601	63.0091	526.069	1.32171	265.878	183.722	76.4682	923.891
N2222	CrCl4	CC[N+](CC)(CC)CC.Cl[Cr-](Cl)(Cl)Cl	0.02	4	180	90	-1	5	9313	57.3365	595.588	1.25275	292.184	247.373	56.0313	924.168
Ch	Asp	C[N+](C)(C)CCO.C(C(C(=O)[O-])N)C(=O)O	0.02	4	190	120	-1	5	5125	60.9758	481.908	1.36648	274.744	128.006	79.1578	924.195
C8TMG	CrCl4	CCCCCCCC[N+]=C(N(C)C)N(C)C.Cl[Cr-](Cl)(Cl)Cl	0.02	4	180	120	-1	5	9460	64.5111	557.708	1.29094	259.688	223.332	74.6878	924.324
DEIM	CoCl3	CC[N]1C=C[N+](=C1)CC.Cl[Co-](Cl)Cl	0.02	4	190	150	-1	5	5047	69.1815	450.138	1.39856	242.157	111.106	96.8751	924.349
TMG	Arg	[N+]=C(N(C)C)N(C)C.C(CC(C(=O)[O-])N)CN=C(N)N	0.02	4	180	120	-1	5	7652	63.0187	527.222	1.32151	265.838	184.927	76.4567	924.367
C8TMG	MnCl3	CCCCCCCC[N+]=C(N(C)C)N(C)C.Cl[Mn-](Cl)Cl	0.04	4	190	120	-1	5	5846	69.6539	565.455	1.28369	240.515	255.645	69.2956	924.574
DMIM	NiCl4	CN1C=C[N+](=C1)C.Cl[Ni-2](Cl)(Cl)Cl	0.06	4	190	120	-1	5	4682	74.8848	573.831	1.27537	223.714	285.662	64.4551	924.603
N2222	CoCl3	CC[N+](CC)(CC)CC.Cl[Co-](Cl)Cl	0.04	4	190	90	-1	5	7513	65.3279	656.017	1.19325	256.441	350.299	49.2764	924.632
C4TMG	FeCl4	CCCC[N+]=C(N(C)C)N(C)C.Cl[Fe-](Cl)(Cl)Cl	0.04	4	190	120	-1	5	4321	67.1369	517.466	1.33182	249.532	196.041	71.8936	924.643
C6TMG	HCO3	CCCCCC[N+]=C(N(C)C)N(C)C.OC([O-])=O	0.02	4	170	120	-1	5	6184	61.7579	501.646	1.34781	271.265	152.5	77.8806	924.728
N1111	HCO3	C[N+](C)(C)C.OC([O-])=O	0.06	4	170	90	-1	5	2307	61.8977	492.741	1.35675	270.653	170.29	51.7983	924.747
N2222	ZnCl3	CC[N+](CC)(CC)CC.Cl[Zn-](Cl)Cl	0.02	6	180	90	-1	5	4258	72.5101	490.109	1.35952	346.561	89.4336	54.1152	924.816
N2222	For	CC[N+](CC)(CC)CC.C(=O)[O-]	0.02	4	170	120	-1	5	6298	61.8452	503.746	1.34591	270.882	155.093	77.7707	924.827
N2222	Ala	CC[N+](CC)(CC)CC.CC(C(=O)[O-])N	0.02	4	160	90	-1	5	6519	54.949	543.793	1.30602	304.879	180.682	58.232	924.904
C6TMG	Gly	CCCCCC[N+]=C(N(C)C)N(C)C.C(C(=O)[O-])N	0.02	4	160	90	-1	5	6375	54.8232	541.04	1.30901	305.578	177.096	58.3655	925.026
N1111	ZnCl3	C[N+](C)(C)C.Cl[Zn-](Cl)Cl	0.02	4	170	180	-1	5	2044	76.0605	377.15	1.47297	220.256	40.9275	115.967	925.062
N1111	Arg	C[N+](C)(C)C.C(CC(C(=O)[O-])N)CN=C(N)N	0.02	4	180	120	-1	5	7781	63.0717	529.893	1.3204	265.615	187.886	76.3923	925.147
C6TMG	FeCl4	CCCCCC[N+]=C(N(C)C)N(C)C.Cl[Fe-](Cl)(Cl)Cl	0.04	4	190	120	-1	5	5013	68.2394	539.994	1.3103	245.5	223.762	70.732	925.149
C2TMG	Asp	CC[N+]=C(N(C)C)N(C)C.C(C(C(=O)[O-])N)C(=O)O	0.02	4	160	90	-1	5	6384	54.8226	541.296	1.30903	305.582	177.348	58.3662	925.162
C6TMG	Ser	CCCCCC[N+]=C(N(C)C)N(C)C.C(C(C(=O)[O-])N)O	0.02	4	160	90	-1	5	6422	54.8537	542.044	1.30828	305.408	178.303	58.3331	925.164
C4TMG	HCO3	CCCC[N+]=C(N(C)C)N(C)C.OC([O-])=O	0.02	4	190	120	-1	5	5227	60.9902	484.341	1.36616	274.68	130.523	79.1391	925.25
C6TMG	ZnCl3	CCCCCC[N+]=C(N(C)C)N(C)C.Cl[Zn-](Cl)Cl	0.06	4	190	120	-1	5	4853	75.253	581.406	1.26913	222.619	294.647	64.1398	925.27
N1111	ZnCl3	C[N+](C)(C)C.Cl[Zn-](Cl)Cl	0.06	4	160	120	-1	5	2044	68.2332	452.757	1.39785	245.522	136.868	70.3667	925.305
C4TMG	Leu	CCCC[N+]=C(N(C)C)N(C)C.CC(C)CC(C(=O)[O-])N	0.02	4	180	120	-1	5	7734	63.0207	529.186	1.32147	265.83	186.902	76.4542	925.328
C2TMG	Ala	CC[N+]=C(N(C)C)N(C)C.CC(C(=O)[O-])N	0.02	4	190	120	-1	5	5200	60.9626	483.887	1.36678	274.804	129.907	79.175	925.332
TMG	Ala	[N+]=C(N(C)C)N(C)C.CC(C(=O)[O-])N	0.04	4	190	90	-1	5	4521	60.3529	559.09	1.29161	277.58	228.171	53.3383	925.349
C6TMG	Ac	CCCCCC[N+]=C(N(C)C)N(C)C.CC(=O)[O-]	0.02	4	170	120	-1	5	6260	61.7766	503.368	1.3474	271.183	154.328	77.857	925.385
N1111	MnCl3	C[N+](C)(C)C.Cl[Mn-](Cl)Cl	0.02	4	180	90	-1	5	2219	51.4207	453.998	1.39687	325.798	65.7224	62.4775	925.435
EMIM	CoCl4	CCN1C=C[N+](=C1)C.Cl[Co-2](Cl)(Cl)Cl	0.04	4	190	150	-1	5	4435	75.531	489.383	1.36164	221.8	178.852	88.7313	925.514
EMIM	CoCl4	CCN1C=C[N+](=C1)C.Cl[Co-2](Cl)(Cl)Cl	0.02	6	190	90	-1	5	4435	72.6295	493.145	1.35793	345.991	92.9982	54.1554	925.538
EMIM	ZnCl4	CCN1C=C[N+](=C1)C.Cl[Zn-2](Cl)(Cl)Cl	0.02	4	190	200	-1	5	1769	82.8631	360.471	1.49068	202.174	32.5133	125.784	925.577
C6TMG	Lys	CCCCCC[N+]=C(N(C)C)N(C)C.C(CCN)CC(C(=O)[O-])N	0.02	4	190	120	-1	5	5164	60.9156	483.359	1.36783	275.016	129.108	79.236	925.596
N1111	ZnCl3	C[N+](C)(C)C.Cl[Zn-](Cl)Cl	0.04	4	190	180	-1	5	2044	81.061	392.591	1.45877	206.669	76.8057	109.117	925.683
N1111	But	C[N+](C)(C)C.CCCC(=O)[O-]	0.06	4	180	90	-1	5	2553	62.4533	506.457	1.3452	268.245	186.771	51.4406	925.826
C2TMG	FeCl4	CC[N+]=C(N(C)C)N(C)C.Cl[Fe-](Cl)(Cl)Cl	0.02	4	180	120	-1	5	3681	59.6384	455.697	1.39642	280.906	94.0013	80.7902	926.056
C6TMG	OH	CCCCCC[N+]=C(N(C)C)N(C)C.[OH-]	0.04	4	180	90	-1	5	7371	64.9726	652.848	1.19928	257.844	345.558	49.4461	926.062
C4TMG	Ac	CCCC[N+]=C(N(C)C)N(C)C.CC(=O)[O-]	0.02	4	190	120	-1	5	5305	60.9814	486.359	1.36636	274.719	132.49	79.1505	926.357
C6TMG	ZnCl4	CCCCCC[N+]=C(N(C)C)N(C)C.Cl[Zn-2](Cl)(Cl)Cl	0.06	4	190	120	-1	5	5675	77.181	615.543	1.23743	217.058	335.947	62.5376	926.487
C2TMG	Arg	CC[N+]=C(N(C)C)N(C)C.C(CC(C(=O)[O-])N)CN=C(N)N	0.02	4	180	120	-1	5	7861	63.0417	532.078	1.32103	265.741	189.908	76.4287	926.554
Ch	Gly	C[N+](C)(C)CCO.C(C(=O)[O-])N	0.06	4	180	90	-1	5	2584	62.4739	508.557	1.34475	268.156	188.977	51.4237	926.655
N2222	ZnCl4	CC[N+](CC)(CC)CC.Cl[Zn-2](Cl)(Cl)Cl	0.02	4	160	150	-1	5	5149	68.9918	453.175	1.40016	242.823	113.663	96.6895	926.666
C6TMG	Gly	CCCCCC[N+]=C(N(C)C)N(C)C.C(C(=O)[O-])N	0.02	4	170	120	-1	5	6375	61.7835	506.147	1.34725	271.153	157.145	77.8483	926.699
C4TMG	Ala	CCCC[N+]=C(N(C)C)N(C)C.CC(C(=O)[O-])N	0.04	4	180	90	-1	5	5947	62.5872	608.427	1.24498	267.671	289.425	51.3306	926.705
C2TMG	Asp	CC[N+]=C(N(C)C)N(C)C.C(C(C(=O)[O-])N)C(=O)O	0.02	4	170	120	-1	5	6384	61.789	506.324	1.34713	271.129	157.353	77.8415	926.728
AMIM	MnCl3	C[N+]1=CN(C=C1)CC=C.Cl[Mn-](Cl)Cl	0.06	4	190	120	-1	5	1989	68.0595	450.593	1.40328	246.149	133.525	70.919	926.934
C6TMG	Ser	CCCCCC[N+]=C(N(C)C)N(C)C.C(C(C(=O)[O-])N)O	0.02	4	170	120	-1	5	6422	61.7954	507.207	1.34699	271.101	158.273	77.8333	927.099
C2TMG	ZnCl4	CC[N+]=C(N(C)C)N(C)C.Cl[Zn-2](Cl)(Cl)Cl	0.08	4	190	120	-1	5	3985	79.5154	576.691	1.27772	210.686	305.303	60.7016	927.203
N2222	But	CC[N+](CC)(CC)CC.CCCC(=O)[O-]	0.04	4	170	90	-1	5	5497	61.7936	593.955	1.26045	271.108	270.961	51.8855	927.204
C6TMG	ZnCl3	CCCCCC[N+]=C(N(C)C)N(C)C.Cl[Zn-](Cl)Cl	0.04	4	190	150	-1	5	4853	76.0694	502.657	1.35201	220.23	194.323	88.1033	927.332
AMIM	CoCl4	C[N+]1=CN(C=C1)CC=C.Cl[Co-2](Cl)(Cl)Cl	0.06	4	190	120	-1	5	4574	74.3974	570.958	1.28373	225.18	280.901	64.8774	927.344
Ch	ZnCl4	C[N+](C)(C)CCO.Cl[Zn-2](Cl)(Cl)Cl	0.04	6	190	90	-1	5	2102	75.5789	469.245	1.38554	332.489	84.7142	52.042	927.394
C6TMG	But	CCCCCC[N+]=C(N(C)C)N(C)C.CCCC(=O)[O-]	0.04	4	180	90	-1	5	5969	62.5758	609.608	1.24521	267.72	290.549	51.3399	927.409
Ch	CrCl4	C[N+](C)(C)CCO.Cl[Cr-](Cl)(Cl)Cl	0.02	4	190	120	-1	5	7553	62.7537	527.181	1.32777	266.961	183.305	76.9152	927.475
N2222	Ala	CC[N+](CC)(CC)CC.CC(C(=O)[O-])N	0.02	4	170	120	-1	5	6519	61.8447	509.192	1.34592	270.885	160.536	77.7713	927.555
TMG	Asp	[N+]=C(N(C)C)N(C)C.C(C(C(=O)[O-])N)C(=O)O	0.04	4	180	90	-1	5	5966	62.5595	609.621	1.24554	267.789	290.479	51.3533	927.578
N2222	Gly	CC[N+](CC)(CC)CC.C(C(=O)[O-])N	0.04	4	180	90	-1	5	6010	62.624	611.133	1.24425	267.513	292.319	51.3004	927.692
N2222	ZnCl3	CC[N+](CC)(CC)CC.Cl[Zn-](Cl)Cl	0.02	4	160	150	-1	5	4258	68.1834	438.646	1.41676	245.702	95.1089	97.8358	927.701
EMIM	NiCl4	CCN1C=C[N+](=C1)C.Cl[Ni-2](Cl)(Cl)Cl	0.08	4	190	90	-1	5	4386	73.7438	633.152	1.22229	227.175	362.324	43.6528	927.72
N2222	ZnCl3	CC[N+](CC)(CC)CC.Cl[Zn-](Cl)Cl	0.04	4	170	150	-1	5	4258	74.9914	485.437	1.37006	223.396	172.949	89.0915	927.747
C4TMG	Gly	CCCC[N+]=C(N(C)C)N(C)C.C(C(=O)[O-])N	0.04	4	170	90	-1	5	5491	61.7452	594.124	1.26144	271.321	270.877	51.9262	927.783
N1111	Ac	C[N+](C)(C)C.CC(=O)[O-]	0.06	4	170	90	-1	5	2398	61.9189	499.287	1.35629	270.56	176.946	51.7806	927.789
Ch	ZnCl4	C[N+](C)(C)CCO.Cl[Zn-2](Cl)(Cl)Cl	0.1	4	180	120	-1	5	2102	78.2639	480.138	1.37544	214.055	204.52	61.5634	927.791
N2222	ZnCl4	CC[N+](CC)(CC)CC.Cl[Zn-2](Cl)(Cl)Cl	0.02	6	180	90	-1	5	5149	72.998	505.423	1.35044	344.244	107.425	53.7535	927.93
N2222	Lys	CC[N+](CC)(CC)CC.C(CCN)CC(C(=O)[O-])N	0.04	4	190	90	-1	5	4590	60.2919	563.141	1.29291	277.861	231.888	53.3923	928.028
C2TMG	Gly	CC[N+]=C(N(C)C)N(C)C.C(C(=O)[O-])N	0.04	4	190	90	-1	5	4637	60.3659	564.822	1.29133	277.52	233.975	53.3268	928.076
C8TMG	Lys	CCCCCCCC[N+]=C(N(C)C)N(C)C.C(CCN)CC(C(=O)[O-])N	0.04	4	180	90	-1	5	5988	62.5482	610.803	1.24576	267.838	291.603	51.3626	928.282
C8TMG	ZnCl4	CCCCCCCC[N+]=C(N(C)C)N(C)C.Cl[Zn-2](Cl)(Cl)Cl	0.04	4	160	90	-1	5	6559	63.443	629.4	1.22718	264.06	314.904	50.4356	928.291
EMIM	NiCl4	CCN1C=C[N+](=C1)C.Cl[Ni-2](Cl)(Cl)Cl	0.06	4	190	120	-1	5	4386	73.837	563.659	1.29347	226.889	271.4	65.3698	928.566
C4TMG	Gly	CCCC[N+]=C(N(C)C)N(C)C.C(C(=O)[O-])N	0.02	4	190	120	-1	5	5491	60.9795	491.02	1.3664	274.728	137.139	79.153	928.71
TMG	ZnCl3	[N+]=C(N(C)C)N(C)C.Cl[Zn-](Cl)Cl	0.02	4	170	180	-1	5	2717	76.3048	389.375	1.46826	219.551	54.2291	115.595	928.818
DMIM	FeCl4	CN1C=C[N+](=C1)C.Cl[Fe-](Cl)(Cl)Cl	0.04	4	190	150	-1	5	2198	71.588	421.156	1.43664	234.016	93.5215	93.6185	928.899
C6TMG	ZnCl4	CCCCCC[N+]=C(N(C)C)N(C)C.Cl[Zn-2](Cl)(Cl)Cl	0.02	4	190	180	-1	5	5675	78.7997	434.53	1.42333	212.6	109.682	112.248	928.929
C6TMG	For	CCCCCC[N+]=C(N(C)C)N(C)C.C(=O)[O-]	0.02	4	160	90	-1	5	6625	54.7953	548.265	1.30968	305.734	184.135	58.3953	928.972
DEIM	ZnCl3	CC[N]1C=C[N+](=C1)CC.Cl[Zn-](Cl)Cl	0.02	4	170	90	-1	5	1790	50.8525	446.096	1.41185	329.438	53.6086	63.0489	928.972
C6TMG	ZnCl4	CCCCCC[N+]=C(N(C)C)N(C)C.Cl[Zn-2](Cl)(Cl)Cl	0.02	6	190	90	-1	5	5675	73.3712	513.898	1.3442	342.493	117.797	53.6079	929.051
C8TMG	NiCl4	CCCCCCCC[N+]=C(N(C)C)N(C)C.Cl[Ni-2](Cl)(Cl)Cl	0.02	4	190	120	-1	5	8296	63.2551	540.891	1.31724	264.845	199.741	76.3055	929.067
AMIM	CoCl4	C[N+]1=CN(C=C1)CC=C.Cl[Co-2](Cl)(Cl)Cl	0.02	4	180	120	-1	5	4574	60.1744	474.24	1.38398	278.404	115.765	80.0706	929.109
Ch	HCO3	C[N+](C)(C)CCO.OC([O-])=O	0.04	4	180	120	-1	5	1984	62.9525	438.65	1.41967	266.118	95.9959	76.537	929.161
C2TMG	For	CC[N+]=C(N(C)C)N(C)C.C(=O)[O-]	0.04	4	190	90	-1	5	4693	60.3799	567.517	1.29103	277.456	236.746	53.3145	929.274
C2TMG	ZnCl3	CC[N+]=C(N(C)C)N(C)C.Cl[Zn-](Cl)Cl	0.02	4	160	150	-1	5	3383	67.336	424.376	1.43459	248.794	76.5153	99.067	929.481
N2222	But	CC[N+](CC)(CC)CC.CCCC(=O)[O-]	0.02	4	190	120	-1	5	5497	60.9335	491.541	1.36743	274.935	137.393	79.2127	929.485
AMIM	CoCl3	C[N+]1=CN(C=C1)CC=C.Cl[Co-](Cl)Cl	0.04	4	190	120	-1	5	5132	68.1111	546.333	1.31277	245.962	229.505	70.8653	929.552
C4TMG	FeCl4	CCCC[N+]=C(N(C)C)N(C)C.Cl[Fe-](Cl)(Cl)Cl	0.02	4	170	90	-1	5	4321	52.8897	501.795	1.35747	316.749	124.425	60.6204	929.632
C4TMG	FeCl4	CCCC[N+]=C(N(C)C)N(C)C.Cl[Fe-](Cl)(Cl)Cl	0.02	4	190	150	-1	5	4321	68.1916	440.458	1.41886	245.672	96.5045	98.2813	929.659
TMG	ZnCl4	[N+]=C(N(C)C)N(C)C.Cl[Zn-2](Cl)(Cl)Cl	0.06	4	180	150	-1	5	3192	79.0111	481.303	1.37811	212.031	184.582	84.6904	929.707
Ch	ZnCl3	C[N+](C)(C)CCO.Cl[Zn-](Cl)Cl	0.04	4	180	180	-1	5	1880	80.3842	389.528	1.47029	208.409	71.2379	109.882	929.91
C6TMG	Ala	CCCCCC[N+]=C(N(C)C)N(C)C.CC(C(=O)[O-])N	0.02	4	160	90	-1	5	6744	54.8311	551.212	1.30882	305.534	187.32	58.3572	930.018
C6TMG	For	CCCCCC[N+]=C(N(C)C)N(C)C.C(=O)[O-]	0.02	4	170	120	-1	5	6625	61.7675	512.442	1.3476	271.223	163.35	77.8685	930.021
DMIM	NiCl4	CN1C=C[N+](=C1)C.Cl[Ni-2](Cl)(Cl)Cl	0.08	4	190	90	-1	5	4682	74.5303	650.665	1.20939	224.778	382.695	43.1921	930.028
N2222	Ser	CC[N+](CC)(CC)CC.C(C(C(=O)[O-])N)O	0.04	4	180	90	-1	5	6118	62.6365	616.263	1.244	267.46	297.513	51.2902	930.133
AMIM	CoCl4	C[N+]1=CN(C=C1)CC=C.Cl[Co-2](Cl)(Cl)Cl	0.08	4	190	90	-1	5	4574	74.1611	645.033	1.21541	225.897	375.728	43.4071	930.221
Ch	Lys	C[N+](C)(C)CCO.C(CCN)CC(C(=O)[O-])N	0.04	4	180	120	-1	5	1993	62.8879	439.537	1.42113	266.391	96.5304	76.6156	930.333
C6TMG	OH	CCCCCC[N+]=C(N(C)C)N(C)C.[OH-]	0.02	4	170	120	-1	5	7371	62.353	525.851	1.33495	268.676	180.038	77.1373	930.399
DEIM	ZnCl4	CC[N]1C=C[N+](=C1)CC.Cl[Zn-2](Cl)(Cl)Cl	0.04	4	190	180	-1	5	1966	80.5142	392.307	1.46868	208.072	74.3764	109.858	930.494
AMIM	CoCl3	C[N+]1=CN(C=C1)CC=C.Cl[Co-](Cl)Cl	0.02	4	190	150	-1	5	5132	68.7906	454.577	1.4065	243.533	113.619	97.4254	930.541
AMIM	ZnCl4	C[N+]1=CN(C=C1)CC=C.Cl[Zn-2](Cl)(Cl)Cl	0.04	4	190	180	-1	5	2047	80.6364	394.772	1.46646	207.757	77.3234	109.691	930.614
N1111	For	C[N+](C)(C)C.C(=O)[O-]	0.06	4	180	90	-1	5	2691	62.4696	516.418	1.34485	268.175	196.816	51.4272	930.632
C4TMG	For	CCCC[N+]=C(N(C)C)N(C)C.C(=O)[O-]	0.02	4	190	120	-1	5	5655	60.9821	495.095	1.36634	274.716	141.229	79.1496	930.717
C4TMG	Arg	CCCC[N+]=C(N(C)C)N(C)C.C(CC(C(=O)[O-])N)CN=C(N)N	0.02	4	180	120	-1	5	8207	63.0425	540.43	1.32101	265.738	198.264	76.4277	930.721
C4TMG	Ser	CCCC[N+]=C(N(C)C)N(C)C.C(C(C(=O)[O-])N)O	0.02	4	190	120	-1	5	5639	60.9659	494.827	1.36671	274.789	140.867	79.1707	930.766
Ch	Ac	C[N+](C)(C)CCO.CC(=O)[O-]	0.04	4	180	120	-1	5	2054	62.9509	442.049	1.41971	266.124	99.3853	76.5389	930.878
C8TMG	Asp	CCCCCCCC[N+]=C(N(C)C)N(C)C.C(C(C(=O)[O-])N)C(=O)O	0.02	4	180	120	-1	5	8192	63.0159	540.296	1.32157	265.85	197.986	76.46	930.933
N2222	ZnCl4	CC[N+](CC)(CC)CC.Cl[Zn-2](Cl)(Cl)Cl	0.04	4	160	120	-1	5	5149	67.9549	547.978	1.31393	246.528	230.795	70.6549	930.955
C8TMG	FeCl4	CCCCCCCC[N+]=C(N(C)C)N(C)C.Cl[Fe-](Cl)(Cl)Cl	0.04	4	190	120	-1	5	5745	69.0027	566.333	1.29581	242.784	253.599	69.9495	931.07
C4TMG	Ser	CCCC[N+]=C(N(C)C)N(C)C.C(C(C(=O)[O-])N)O	0.04	4	170	90	-1	5	5639	61.7589	601.292	1.26116	271.261	278.116	51.9147	931.227
C6TMG	MnCl3	CCCCCC[N+]=C(N(C)C)N(C)C.Cl[Mn-](Cl)Cl	0.06	4	190	90	-1	5	5048	68.2323	630.726	1.23174	245.525	338.022	47.1788	931.231
C6TMG	Ala	CCCCCC[N+]=C(N(C)C)N(C)C.CC(C(=O)[O-])N	0.02	4	170	120	-1	5	6744	61.7774	515.293	1.34738	271.18	166.258	77.856	931.339
N2222	ZnCl3	CC[N+](CC)(CC)CC.Cl[Zn-](Cl)Cl	0.06	4	160	90	-1	5	4258	66.2114	595.171	1.26788	253.02	293.825	48.3269	931.526
DEIM	ZnCl4	CC[N]1C=C[N+](=C1)CC.Cl[Zn-2](Cl)(Cl)Cl	0.04	4	180	150	-1	5	1966	70.9715	414.71	1.44839	236.049	84.3769	94.284	931.548
Ch	MnCl3	C[N+](C)(C)CCO.Cl[Mn-](Cl)Cl	0.02	4	180	120	-1	5	2028	57.932	425.664	1.43755	289.18	53.3143	83.1699	931.606
DEIM	ZnCl4	CC[N]1C=C[N+](=C1)CC.Cl[Zn-2](Cl)(Cl)Cl	0.08	4	180	90	-1	5	1966	65.5011	487.658	1.37561	255.763	182.847	49.047	931.633
N1111	Leu	C[N+](C)(C)C.CC(C)CC(C(=O)[O-])N	0.02	4	160	90	-1	5	6994	54.9377	557.073	1.30628	304.942	193.887	58.244	931.679
N2222	HCO3	CC[N+](CC)(CC)CC.OC([O-])=O	0.02	4	190	120	-1	5	5725	60.9735	496.913	1.36653	274.755	142.997	79.1608	931.723
Ch	Leu	C[N+](C)(C)CCO.CC(C)CC(C(=O)[O-])N	0.04	4	180	90	-1	5	6166	62.605	618.909	1.24463	267.595	299.998	51.316	931.769
C2TMG	FeCl4	CC[N+]=C(N(C)C)N(C)C.Cl[Fe-](Cl)(Cl)Cl	0.04	4	190	120	-1	5	3681	65.5727	500.081	1.36359	255.484	170.989	73.6086	931.836
Ch	Arg	C[N+](C)(C)CCO.C(CC(C(=O)[O-])N)CN=C(N)N	0.02	4	160	90	-1	5	6996	54.926	557.246	1.30656	305.006	193.984	58.2563	931.904
C6TMG	Leu	CCCCCC[N+]=C(N(C)C)N(C)C.CC(C)CC(C(=O)[O-])N	0.02	4	180	120	-1	5	8277	63.0142	542.364	1.32161	265.857	200.045	76.462	931.985
AMIM	FeCl4	C[N+]1=CN(C=C1)CC=C.Cl[Fe-](Cl)(Cl)Cl	0.06	4	190	120	-1	5	2292	68.4289	468.391	1.3957	244.82	153.035	70.5362	932.046
C4TMG	For	CCCC[N+]=C(N(C)C)N(C)C.C(=O)[O-]	0.04	4	170	90	-1	5	5655	61.7291	602.372	1.26177	271.392	279.04	51.9398	932.072
C8TMG	But	CCCCCCCC[N+]=C(N(C)C)N(C)C.CCCC(=O)[O-]	0.02	4	160	90	-1	5	6873	54.8136	554.972	1.30924	305.632	190.964	58.3758	932.107
TMG	ZnCl4	[N+]=C(N(C)C)N(C)C.Cl[Zn-2](Cl)(Cl)Cl	0.02	4	170	180	-1	5	3192	76.3986	398.366	1.46646	219.281	63.6314	115.453	932.411
C4TMG	Asp	CCCC[N+]=C(N(C)C)N(C)C.C(C(C(=O)[O-])N)C(=O)O	0.02	4	160	90	-1	5	6913	54.8229	555.989	1.30902	305.58	192.043	58.3659	932.504
C2TMG	ZnCl3	CC[N+]=C(N(C)C)N(C)C.Cl[Zn-](Cl)Cl	0.06	4	190	150	-1	5	3383	79.2754	490.839	1.37417	211.324	194.975	84.5402	932.507
N1111	Asp	C[N+](C)(C)C.C(C(C(=O)[O-])N)C(=O)O	0.02	4	190	120	-1	5	5793	60.9732	498.614	1.36654	274.756	144.697	79.1611	932.577
N1111	ZnCl3	C[N+](C)(C)C.Cl[Zn-](Cl)Cl	0.1	4	180	120	-1	5	2044	77.6245	478.403	1.38677	215.818	200.515	62.0705	932.588
C6TMG	HCO3	CCCCCC[N+]=C(N(C)C)N(C)C.OC([O-])=O	0.04	4	180	90	-1	5	6184	62.5702	620.13	1.24532	267.744	301.041	51.3446	932.727
TMG	CoCl4	[N+]=C(N(C)C)N(C)C.Cl[Co-2](Cl)(Cl)Cl	0.02	4	190	90	-1	5	5842	53.9942	534.671	1.33089	310.27	164.782	59.6198	932.781
N2222	HCO3	CC[N+](CC)(CC)CC.OC([O-])=O	0.04	4	170	90	-1	5	5725	61.7875	605.254	1.26058	271.136	282.227	51.8907	932.917
C6TMG	CrCl4	CCCCCC[N+]=C(N(C)C)N(C)C.Cl[Cr-](Cl)(Cl)Cl	0.02	4	180	120	-1	5	8986	63.5233	555.016	1.31102	263.727	215.441	75.8493	933.016
DMIM	MnCl3	CN1C=C[N+](=C1)C.Cl[Mn-](Cl)Cl	0.04	4	180	90	-1	5	1851	55.4771	461.514	1.40454	301.976	101.629	57.9092	933.029
AMIM	ZnCl4	C[N+]1=CN(C=C1)CC=C.Cl[Zn-2](Cl)(Cl)Cl	0.06	4	180	120	-1	5	2047	67.7225	456.622	1.40963	247.374	138.102	71.1461	933.127
C8TMG	But	CCCCCCCC[N+]=C(N(C)C)N(C)C.CCCC(=O)[O-]	0.02	4	170	120	-1	5	6873	61.7639	518.587	1.34768	271.239	169.475	77.873	933.133
N1111	ZnCl4	C[N+](C)(C)C.Cl[Zn-2](Cl)(Cl)Cl	0.06	4	180	150	-1	5	2368	76.6952	446.749	1.41972	218.433	141.068	87.2477	933.237
N2222	Ac	CC[N+](CC)(CC)CC.CC(=O)[O-]	0.02	4	190	120	-1	5	5825	60.9535	499.575	1.36698	274.845	145.543	79.1868	933.278
EMIM	NiCl4	CCN1C=C[N+](=C1)C.Cl[Ni-2](Cl)(Cl)Cl	0.02	4	180	120	-1	5	4386	59.7511	472.807	1.39378	280.376	111.794	80.6378	933.295
C4TMG	Asp	CCCC[N+]=C(N(C)C)N(C)C.C(C(C(=O)[O-])N)C(=O)O	0.02	4	170	120	-1	5	6913	61.7856	519.391	1.34721	271.144	170.401	77.8457	933.298
Ch	Arg	C[N+](C)(C)CCO.C(CC(C(=O)[O-])N)CN=C(N)N	0.02	4	170	120	-1	5	6996	61.8444	520.941	1.34592	270.886	172.283	77.7717	933.433
C2TMG	ZnCl4	CC[N+]=C(N(C)C)N(C)C.Cl[Zn-2](Cl)(Cl)Cl	0.1	4	190	90	-1	5	3985	78.4946	641.028	1.22592	213.426	386.592	41.0107	933.474
Ch	OH	C[N+](C)(C)CCO.[OH-]	0.02	4	180	150	-1	5	2579	66.4571	411.875	1.45511	252.084	59.1023	100.689	933.492
DEIM	ZnCl3	CC[N]1C=C[N+](=C1)CC.Cl[Zn-](Cl)Cl	0.08	4	180	90	-1	5	1790	64.7941	476.431	1.39062	258.554	168.295	49.5823	933.525
TMG	ZnCl3	[N+]=C(N(C)C)N(C)C.Cl[Zn-](Cl)Cl	0.1	4	170	90	-1	5	2717	73.2741	554.748	1.31238	228.632	282.36	43.7562	933.566
N1111	Leu	C[N+](C)(C)C.CC(C)CC(C(=O)[O-])N	0.02	4	170	120	-1	5	6994	61.8298	521.015	1.34624	270.95	172.275	77.79	933.628
N2222	CoCl4	CC[N+](CC)(CC)CC.Cl[Co-2](Cl)(Cl)Cl	0.02	4	190	90	-1	5	7642	55.4076	570.508	1.29694	302.355	210.054	58.0989	933.724
Ch	CoCl4	C[N+](C)(C)CCO.Cl[Co-2](Cl)(Cl)Cl	0.02	4	190	90	-1	5	4865	53.1414	515.251	1.35225	315.249	139.426	60.5765	933.75
Ch	ZnCl4	C[N+](C)(C)CCO.Cl[Zn-2](Cl)(Cl)Cl	0.08	4	190	150	-1	5	2102	81.0084	447.607	1.41998	206.803	158.073	82.7317	933.793
N1111	But	C[N+](C)(C)C.CCCC(=O)[O-]	0.06	4	170	90	-1	5	2553	61.8968	510.907	1.35677	270.657	188.451	51.7991	933.84
N1111	FeCl4	C[N+](C)(C)C.Cl[Fe-](Cl)(Cl)Cl	0.02	4	190	120	-1	5	2546	58.2413	437.095	1.43064	287.644	66.5766	82.8743	933.867
TMG	OH	[N+]=C(N(C)C)N(C)C.[OH-]	0.04	4	190	120	-1	5	4352	66.5173	523.705	1.34422	251.856	199.287	72.5632	933.965
C6TMG	NiCl4	CCCCCC[N+]=C(N(C)C)N(C)C.Cl[Ni-2](Cl)(Cl)Cl	0.02	4	180	90	-1	5	7565	55.3093	569.285	1.29866	302.893	208.308	58.085	933.974
C8TMG	CoCl4	CCCCCCCC[N+]=C(N(C)C)N(C)C.Cl[Co-2](Cl)(Cl)Cl	0.02	4	180	90	-1	5	8326	55.9288	583.702	1.28428	299.538	226.723	57.4416	933.991
N2222	Leu	CC[N+](CC)(CC)CC.CC(C)CC(C(=O)[O-])N	0.02	4	180	120	-1	5	8495	63.0403	547.406	1.32106	265.747	205.229	76.4303	934.232
DEIM	ZnCl3	CC[N]1C=C[N+](=C1)CC.Cl[Zn-](Cl)Cl	0.06	4	180	120	-1	5	1790	67.0097	443.956	1.42463	250.005	122.048	71.9029	934.291
C6TMG	Ac	CCCCCC[N+]=C(N(C)C)N(C)C.CC(=O)[O-]	0.04	4	180	90	-1	5	6260	62.5799	623.732	1.24513	267.702	304.693	51.3365	934.43
N1111	Asp	C[N+](C)(C)C.C(C(C(=O)[O-])N)C(=O)O	0.04	4	170	90	-1	5	5793	61.7954	608.527	1.26042	271.101	285.543	51.884	934.472
TMG	Asp	[N+]=C(N(C)C)N(C)C.C(C(C(=O)[O-])N)C(=O)O	0.02	4	190	120	-1	5	5966	60.986	502.83	1.36625	274.699	148.987	79.1446	934.542
AMIM	FeCl4	C[N+]1=CN(C=C1)CC=C.Cl[Fe-](Cl)(Cl)Cl	0.08	4	190	90	-1	5	2292	66.3805	511.213	1.35787	252.375	210.343	48.495	934.542
TMG	ZnCl3	[N+]=C(N(C)C)N(C)C.Cl[Zn-](Cl)Cl	0.12	4	190	90	-1	5	2717	78.7117	569.159	1.29993	212.837	315.425	40.8976	934.546
C4TMG	Ala	CCCC[N+]=C(N(C)C)N(C)C.CC(C(=O)[O-])N	0.02	4	190	120	-1	5	5947	60.9677	502.506	1.36666	274.781	148.557	79.1683	934.585
AMIM	ZnCl4	C[N+]1=CN(C=C1)CC=C.Cl[Zn-2](Cl)(Cl)Cl	0.02	4	170	90	-1	5	2047	50.7535	454.679	1.4146	330.081	61.4252	63.1719	934.642
Ch	Gly	C[N+](C)(C)CCO.C(C(=O)[O-])N	0.06	4	170	90	-1	5	2584	61.9185	513.015	1.3563	270.562	190.672	51.7809	934.656
N2222	For	CC[N+](CC)(CC)CC.C(=O)[O-]	0.04	4	180	90	-1	5	6298	62.6251	625.131	1.24423	267.509	306.322	51.2995	934.681
C2TMG	ZnCl3	CC[N+]=C(N(C)C)N(C)C.Cl[Zn-](Cl)Cl	0.08	4	180	120	-1	5	3383	76.8803	548.644	1.32096	217.907	268.066	62.6714	934.802
TMG	Leu	[N+]=C(N(C)C)N(C)C.CC(C)CC(C(=O)[O-])N	0.02	4	160	90	-1	5	6971	54.7308	558.538	1.31122	306.094	193.98	58.4641	934.879
C2TMG	Ser	CC[N+]=C(N(C)C)N(C)C.C(C(C(=O)[O-])N)O	0.04	4	190	90	-1	5	4906	60.3587	578.465	1.29148	277.554	247.578	53.3332	934.975
N1111	ZnCl3	C[N+](C)(C)C.Cl[Zn-](Cl)Cl	0.04	6	190	90	-1	5	2044	74.8688	471.336	1.39868	335.643	83.158	52.5356	935.01
TMG	Leu	[N+]=C(N(C)C)N(C)C.CC(C)CC(C(=O)[O-])N	0.02	4	170	120	-1	5	6971	61.7164	521.404	1.34872	271.448	172.024	77.9329	935.06
N2222	OH	CC[N+](CC)(CC)CC.[OH-]	0.02	4	170	120	-1	5	7333	62.0077	527.846	1.34238	270.172	180.107	77.5668	935.113
Ch	ZnCl3	C[N+](C)(C)CCO.Cl[Zn-](Cl)Cl	0.02	4	190	200	-1	5	1880	82.1055	365.856	1.50444	204.04	34.8722	126.944	935.146
Ch	ZnCl4	C[N+](C)(C)CCO.Cl[Zn-2](Cl)(Cl)Cl	0.06	4	170	150	-1	5	2102	75.8543	435.542	1.43478	220.854	126.61	88.0779	935.162
N2222	Ac	CC[N+](CC)(CC)CC.CC(=O)[O-]	0.04	4	170	90	-1	5	5825	61.8016	610.044	1.26029	271.074	287.092	51.8789	935.168
C6TMG	But	CCCCCC[N+]=C(N(C)C)N(C)C.CCCC(=O)[O-]	0.02	4	190	120	-1	5	5969	60.9445	503.247	1.36718	274.886	149.163	79.1984	935.215
DMIM	ZnCl3	CN1C=C[N+](=C1)C.Cl[Zn-](Cl)Cl	0.02	4	190	200	-1	5	1706	81.9561	363.29	1.50718	204.412	31.7024	127.176	935.235
C6TMG	CoCl3	CCCCCC[N+]=C(N(C)C)N(C)C.Cl[Co-](Cl)Cl	0.02	4	190	150	-1	5	7501	70.3723	495.63	1.37489	238.059	162.335	95.2358	935.261
TMG	ZnCl3	[N+]=C(N(C)C)N(C)C.Cl[Zn-](Cl)Cl	0.08	4	170	120	-1	5	2717	74.6445	510.61	1.35996	224.434	221.741	64.4353	935.286
N1111	Lys	C[N+](C)(C)C.C(CCN)CC(C(=O)[O-])N	0.04	4	180	120	-1	5	2193	62.8781	449.294	1.42135	266.433	106.234	76.6276	935.323
EMIM	FeCl4	CCN1C=C[N+](=C1)C.Cl[Fe-](Cl)(Cl)Cl	0.04	4	190	150	-1	5	2108	70.9427	421.123	1.44971	236.145	90.508	94.4701	935.417
Ch	But	C[N+](C)(C)CCO.CCCC(=O)[O-]	0.04	4	180	120	-1	5	2235	62.9329	450.935	1.42011	266.2	108.174	76.5608	935.524
DMIM	ZnCl4	CN1C=C[N+](=C1)C.Cl[Zn-2](Cl)(Cl)Cl	0.02	4	180	180	-1	5	1877	75.1118	378.691	1.49239	223.038	38.0584	117.595	935.542
Ch	OH	C[N+](C)(C)CCO.[OH-]	0.02	4	160	90	-1	5	2579	51.11	467.234	1.40411	327.779	76.8492	62.6059	935.674
N2222	ZnCl3	CC[N+](CC)(CC)CC.Cl[Zn-](Cl)Cl	0.08	4	170	90	-1	5	4258	72.6584	631.701	1.23966	230.569	357.005	44.127	935.681
N2222	Gly	CC[N+](CC)(CC)CC.C(C(=O)[O-])N	0.02	4	190	120	-1	5	6010	60.9458	504.261	1.36715	274.88	150.184	79.1967	935.707
C4TMG	ZnCl3	CCCC[N+]=C(N(C)C)N(C)C.Cl[Zn-](Cl)Cl	0.02	4	180	180	-1	5	4096	76.9001	413.831	1.45769	217.851	81.1199	114.86	935.759
Ch	For	C[N+](C)(C)CCO.C(=O)[O-]	0.04	4	180	120	-1	5	2256	62.9499	451.83	1.41973	266.129	109.161	76.5402	935.781
N2222	MnCl3	CC[N+](CC)(CC)CC.Cl[Mn-](Cl)Cl	0.04	4	180	90	-1	5	4478	59.5836	564.001	1.30774	281.164	228.919	53.9181	935.872
EMIM	ZnCl3	CCN1C=C[N+](=C1)C.Cl[Zn-](Cl)Cl	0.04	4	180	150	-1	5	1632	70.0994	405.357	1.46641	238.986	70.9136	95.457	935.881
Ch	HCO3	C[N+](C)(C)CCO.OC([O-])=O	0.04	4	160	90	-1	5	1984	55.4801	468.559	1.40332	301.96	108.925	57.6745	935.937
DMIM	ZnCl4	CN1C=C[N+](=C1)C.Cl[Zn-2](Cl)(Cl)Cl	0.08	4	180	90	-1	5	1877	64.9074	483.765	1.38819	258.103	176.167	49.4957	935.979
C8TMG	Lys	CCCCCCCC[N+]=C(N(C)C)N(C)C.C(CCN)CC(C(=O)[O-])N	0.02	4	190	120	-1	5	5988	60.9053	504.046	1.36806	275.063	149.734	79.2495	936.055
C6TMG	OH	CCCCCC[N+]=C(N(C)C)N(C)C.[OH-]	0.04	4	190	90	-1	5	7371	64.2876	659.904	1.21256	260.591	349.239	50.0737	936.23
C6TMG	Arg	CCCCCC[N+]=C(N(C)C)N(C)C.C(CC(C(=O)[O-])N)CN=C(N)N	0.02	4	180	120	-1	5	8651	63.0324	551.244	1.32122	265.78	209.024	76.44	936.235
C2TMG	ZnCl4	CC[N+]=C(N(C)C)N(C)C.Cl[Zn-2](Cl)(Cl)Cl	0.06	4	190	150	-1	5	3985	80.4172	518.072	1.35466	208.323	226.409	83.3398	936.367
DEIM	CoCl3	CC[N]1C=C[N+](=C1)CC.Cl[Co-](Cl)Cl	0.06	4	190	90	-1	5	5047	67.8506	634.207	1.23867	246.907	339.856	47.4442	936.436
C6TMG	CrCl4	CCCCCC[N+]=C(N(C)C)N(C)C.Cl[Cr-](Cl)(Cl)Cl	0.04	4	190	90	-1	5	8986	66.894	707.729	1.16531	250.437	409.169	48.1227	936.52
C2TMG	ZnCl3	CC[N+]=C(N(C)C)N(C)C.Cl[Zn-](Cl)Cl	0.1	4	180	90	-1	5	3383	75.7636	603.543	1.26968	221.119	340.021	42.4034	936.613
Ch	Lys	C[N+](C)(C)CCO.C(CCN)CC(C(=O)[O-])N	0.04	4	160	90	-1	5	1993	55.4527	469.286	1.40401	302.109	109.473	57.703	936.648
C8TMG	HCO3	CCCCCCCC[N+]=C(N(C)C)N(C)C.OC([O-])=O	0.02	4	160	90	-1	5	7149	54.7719	563.069	1.31024	305.864	198.784	58.4202	936.653
C8TMG	HCO3	CCCCCCCC[N+]=C(N(C)C)N(C)C.OC([O-])=O	0.02	4	170	120	-1	5	7149	61.7513	525.499	1.34795	271.294	176.316	77.8889	936.726
C8TMG	Ser	CCCCCCCC[N+]=C(N(C)C)N(C)C.C(C(C(=O)[O-])N)O	0.02	4	160	90	-1	5	7242	54.8418	564.933	1.30857	305.474	201.113	58.3457	936.75
EMIM	ZnCl3	CCN1C=C[N+](=C1)C.Cl[Zn-](Cl)Cl	0.04	4	190	180	-1	5	1632	79.4328	384.84	1.48868	210.905	62.5813	111.353	936.758
C2TMG	FeCl4	CC[N+]=C(N(C)C)N(C)C.Cl[Fe-](Cl)(Cl)Cl	0.04	4	180	90	-1	5	3681	58.2281	535.438	1.33819	287.709	192.556	55.1733	936.812
[truncated: 8,002 more rows]
